# Supplementary material for: Silver-catalyzed intramolecular hydroamination of alkynes in aqueous media: efficient and regioselective synthesis for fused benzimidazoles
Source: Royal Society of Chemistry journal article supplement (doi:10.1039/c0gc00668h), 2010-12-23

*Supporting Information for*

**Silver-catalyzed intramolecular hydroamination of alkynes in aqueous media: efficient and regioselective synthesis for fused benzimidazoles**

Xu Zhang,<sup>a, b</sup> Yu Zhou,<sup>b</sup> Hengshuai Wang,<sup>b</sup> Diliang Guo,<sup>a, b</sup> Deju Ye,<sup>b</sup> Yungen Xu,<sup>a</sup>  
Hualiang Jiang,<sup>b</sup> and Hong Liu<sup>a, b\*</sup>

<sup>a</sup> *Department of Medicinal Chemistry, China Pharmaceutical University, 24 Tong jia Xiang, Nanjing, 210009, P. R. China*

<sup>b</sup> *State Key Laboratory of Drug Research, Shanghai Institute of Materia Medica, Chinese Academy of Sciences, Shanghai, 201203, China*

Email: [hliu@mail.shcnc.ac.cn](mailto:hliu@mail.shcnc.ac.cn).

# Contents

**General Information .....S3**

**General Procedure for Synthesis of A1-A27.....S3**

**Characterization Data for A1-A27.....S7**

**Copies of  $^1\text{H}$  NMR and  $^{13}\text{C}$  NMR of A1-A27.....S17**

## General Information

Commercially available reagents and solvents were used without further purification. Column chromatography was carried out on silica gel.  $^1\text{H}$  and  $^{13}\text{C}$  NMR spectra were obtained on Varian Mercury-300 and/or Varian Mercury-400 spectrometers (TMS as IS). Chemical shifts were reported in parts per million (ppm,  $\delta$ ) downfield from tetramethylsilane. Proton coupling patterns are described as singlet (s), doublet (d), triplet (t), quartet (q), multipet (m) and broad (br). Low- and high-resolution mass spectra (LRMS and HRMS) were measured on Finnigan MAT 95 spectrometer.

## General Procedure for Synthesis of A1-A27

### General Procedure for Synthesis of 2-(Pent-4-ynyl)-1*H*-benzo[d]imidazoles (A1-A3, A13, A15)

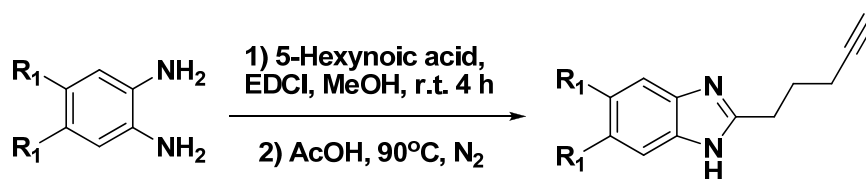

To a solution of substituted or unsubstituted 1, 2-phenylenediamine (2.0 mmol) in methanol (20 ml) was added 5-Hexynoic acid (1.0 equiv.) and EDCI (1.1 equiv.). The reaction mixture was stirred at room temperature for 4-5 h with being monitored by TLC. The solvent was concentrated in vacuums and the amidic intermediate derivatives were precipitated by the addition of water. After filtration, the solid was dried. Then the solid was dissolved in neat acetic acid, and stirred at 90 °C under  $\text{N}_2$  for 5 h. The acetic acid was distilled off; the residue was dissolved in EtOAc, and washed by saturated  $\text{NaHCO}_3$ , brine, dried over anhydrous  $\text{Na}_2\text{SO}_4$ . Evaporation of the solvent followed by chromatography on a silica gel column with Petro Ether (PE) / EtOAc (4 / 1, v / v) as eluent afforded products.

## General Procedure for Synthesis of 2-(5-Phenylpent-4-ynyl)-1H-benzo[d]imidazoles (A4-A12, A14)

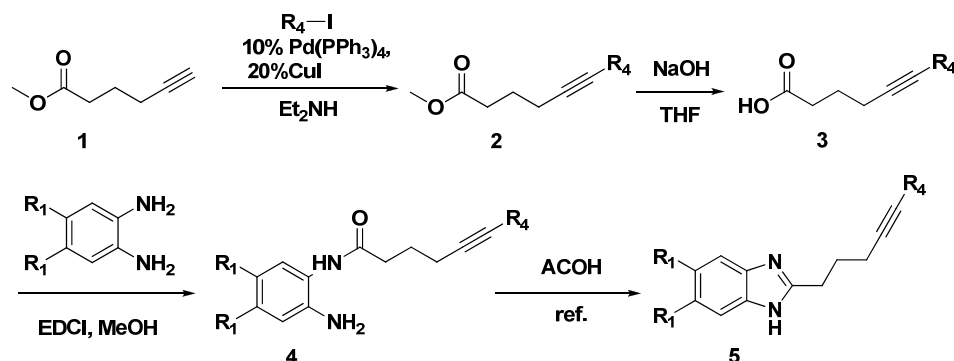

A solution of iodobenzenes (7.83 mmol), Pd (PPh<sub>3</sub>)<sub>4</sub> (0.1eq.) and CuI (0.2eq) in Et<sub>2</sub>NH (20 ml) was stirred at room temperature for 5 minutes. To the resulting mixture, a solution of 1 (0.9eq) in Et<sub>2</sub>NH (10 ml) was added. The reaction mixture was stirred at room temperature until completion (TLC, 2 hours). Then, the reaction was diluted with EtOAc, an aqueous saturated solution of NH<sub>4</sub>Cl (30 ml) was added, and the mixture extracted with EtOAc (3 x 30ml). The combined organic layers were dried with Na<sub>2</sub>SO<sub>4</sub>, filtered, and the solvent evaporated under reduced pressure. The crude ester was filtered through a short pad of SiO<sub>2</sub> Petro Ether (PE) / EtOAc (9 / 1, v / v), dissolved in THF (25 ml), 25 ml of aqueous KOH 1M were added and the mixture was vigorously stirred at room temperature until completion (TLC, 3 hours). The reaction mixture was washed with Et<sub>2</sub>O and this organic layer was discharged. To the aqueous phase was added aqueous HCl 5% until PH = 2 and was extracted with Et<sub>2</sub>O (3 x 50 ml). The combined organic layers were dried over Na<sub>2</sub>SO<sub>4</sub>, filtered and the solvent evaporated under reduced pressure and get crude acids.

To a solution of substituted or unsubstituted 1, 2-phenylenediamine (2.0 mmol) in methanol (20 ml) was added crude acid (1.0 equiv.) and EDCI (1.1 equiv.). The reaction mixture was stirred at room temperature for 4-5 h with being monitored by TLC. The solvent was concentrated in vacuo and the amidic intermediate derivatives were precipitated by the addition of water. After filtration, the solid was dried. Then the solid was dissolved in neat acetic acid, and stirred at 90 °C under N<sub>2</sub> for 5 h. The acetic acid was distilled off; the residue was dissolved in EtOAc, and washed by saturated NaHCO<sub>3</sub>, brine, dried over anhydrous Na<sub>2</sub>SO<sub>4</sub>. Evaporation of the solvent

followed by recrystallization from Petro Ether (PE) / EtOAc (2 / 1, v / v), and get pure products.

**General Procedure for Synthesis of *N*-(Prop-2-ynyl)benzo[d]thiazol-2-amine (A16)**

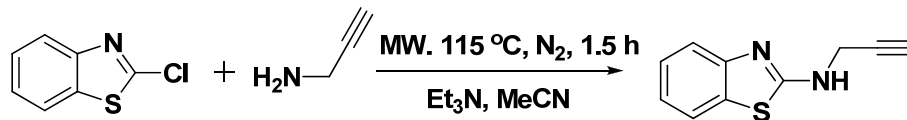

A mixture of 2-chlorobenzo[d]thiazole (0.6mmol), prop-2-yn-1-amine (1.5eq.) and Et<sub>3</sub>N (1.5eq.) was stirred in CH<sub>3</sub>CN (5ml) under N<sub>2</sub>. The vial was sealed and the mixture was then irradiated for 1.5 h at 115 °C. After the reaction was cooled to ambient temperature, and evaporation of the solvent followed by chromatography on a silica gel column with Petro Ether (PE) / EtOAc (4 / 1, v / v) as eluent afforded pure product.

**General Procedure for Synthesis of 2-((Prop-2-ynyloxy) methyl)-1*H*-benzo[d]imidazoles (A17-A19, A27)**

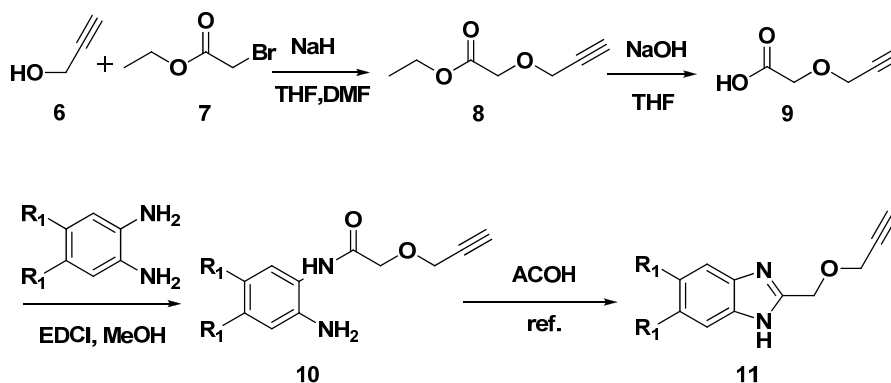

To a solution of propargyl alcohol (6) 1g (17.86 mmol) in THF/DMF (5:1, 20 ml) was added NaH (1.0 equiv.) at 0°C, and the reaction mixture was stirred for 30min. To the resulting mixture, a solution of 7 (2.668g, 16.1 mmol) in THF/DMF (5:1, 10 ml) was added. The reaction mixture was stirred at room temperature until completion (TLC, 4 hours). The solvent was concentrated in vacuums and diluted with EtOAc (50 ml), washed by water, brine, and the solvent evaporated under reduced pressure and get crude product. The residue was dissolved in THF (15 ml), 20 ml of aqueous NaOH 1M were added and the mixture was vigorously stirred at room temperature until completion (TLC, 3 hours). The solvent was concentrated in vacuums and the reaction mixture was washed with Et<sub>2</sub>O and this organic layer was discharged. To the aqueous

phase was added aqueous HCl 5% until PH = 2 and was extracted with Et<sub>2</sub>O (3 x 50 mL). The combined organic layers were dried over Na<sub>2</sub>SO<sub>4</sub>, filtered and the solvent evaporated under reduced pressure and get crude product. The next steps followed by the general procedure (A1-A3) using substituted or unsubstituted 1, 2-phenylenediamine and crude acid provided A17-A19, A27.

**General Procedure for Synthesis of 2-((But-2-ynyloxy)methyl)-1H-benzo[d]imidazole (A20-A22)**

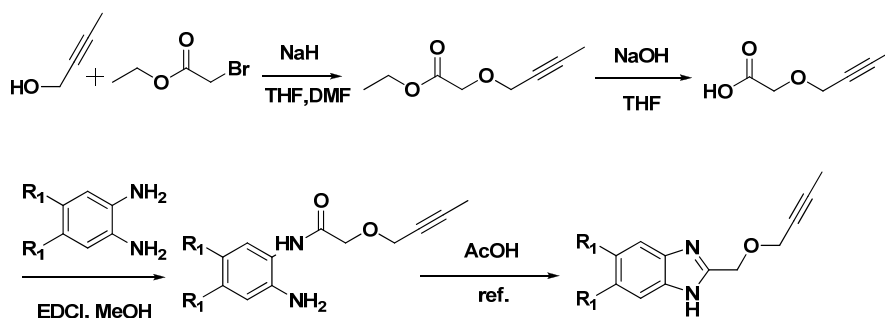

Following the general procedure (A17-A19) using substituted or unsubstituted 1, 2-phenylenediamine and crude acid provided A20-A22.

**General Procedure for Synthesis of 2-((3-Phenylprop-2-ynyloxy)methyl)-1H-benzo[d]imidazoles (A23-A26)**

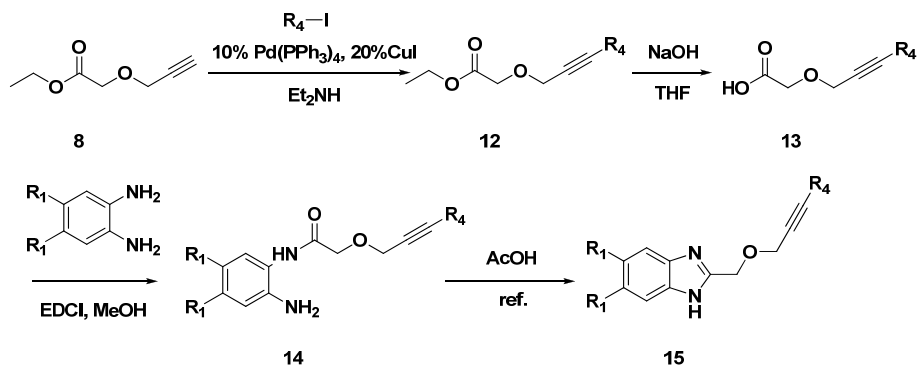

Following the general procedure (A17-A19, A4-A12) using substituted or unsubstituted 1, 2-phenylenediamine and crude acid provided A23-A26.

## Characterization Data for A1-A27

### 2-(Pent-4-ynyl)-1*H*-benzo[*d*]imidazole (A1)

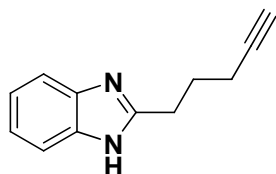

$^1\text{H}$  NMR (300 MHz,  $\text{CDCl}_3$ ):  $\delta$  1.91 (t, 1H, CH), 2.07-2.17 (m, 2H,  $\text{CH}_2$ ), 2.26-2.32 (m, 2H,  $\text{CH}_2$ ), 3.14 (t, 2H,  $\text{CH}_2$ ), 7.21-7.25 (m, 2H, ArH), 7.55-7.61 (m, 2H, ArH), 11.06 (brs, 1H, NH);  $^{13}\text{C}$  NMR (100 MHz,  $\text{CDCl}_3$ ):  $\delta$  17.9, 26.8, 28.0, 69.4, 83.1, 114.6, 122.2, 138.5, 154.6; ESI-MS  $m/z$  185  $[\text{M} + \text{H}]^+$ ; HRMS (ESI) calcd. for  $\text{C}_{12}\text{H}_{13}\text{N}_2$   $[\text{M} + \text{H}]^+$  185.1079, found 185.1085.

### 5,6-Dimethyl-2-(pent-4-ynyl)-1*H*-benzo[*d*]imidazole (A2)

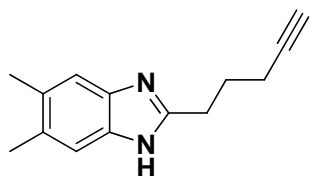

$^1\text{H}$  NMR (300 MHz,  $\text{CDCl}_3$ ):  $\delta$  1.94 (t, 1H, CH), 2.03-2.13 (m, 2H,  $\text{CH}_2$ ), 2.24-2.30 (m, 2H,  $\text{CH}_2$ ), 2.35 (s, 6H,  $\text{CH}_3$ ), 3.05 (t, 2H,  $\text{CH}_2$ ), 7.33 (s, 2H, ArH);  $^{13}\text{C}$  NMR (100 MHz,  $\text{CDCl}_3$ ):  $\delta$  17.9, 20.3, 26.8, 27.9, 69.4, 83.3, 114.8, 131.0, 137.0, 153.4; ESI-MS  $m/z$  213  $[\text{M} + \text{H}]^+$ ; HRMS (ESI) calcd. for  $\text{C}_{14}\text{H}_{17}\text{N}_2$   $[\text{M} + \text{H}]^+$  213.1392, found 213.1389.

### 5, 6-Dichloro-2-(pent-4-ynyl)-1*H*-benzo[*d*]imidazole (A3)

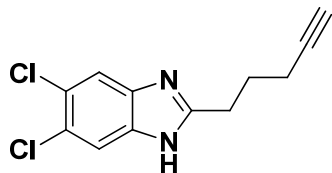

$^1\text{H}$  NMR (300 MHz,  $\text{CDCl}_3$ ):  $\delta$  2.02 (m, 3H, CH,  $\text{CH}_2$ ), 2.30-2.35 (m, 2H,  $\text{CH}_2$ ), 3.06 (t, 2H,  $\text{CH}_2$ ), 7.65 (s, 2H, ArH);  $^{13}\text{C}$  NMR (100 MHz,  $\text{CDCl}_3$ ):  $\delta$  17.8, 26.3, 27.8, 69.9, 82.9, 126.4, 156.2; ESI-MS  $m/z$  253  $[\text{M} + \text{H}]^+$ ; HRMS (ESI) calcd. for  $\text{C}_{12}\text{H}_{11}\text{N}_2\text{Cl}_2$   $[\text{M} + \text{H}]^+$  253.0299, found 253.0306.

**2-(5-Phenylpent-4-ynyl)-1H-benzo[d]imidazole (A4)**

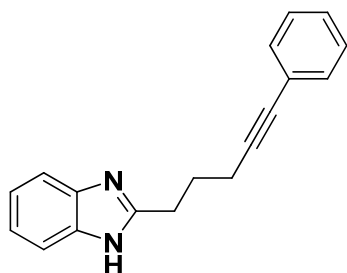

$^1\text{H}$  NMR (300 MHz,  $\text{CDCl}_3$ ):  $\delta$  2.11-2.21 (m, 2H,  $\text{CH}_2$ ), 2.49 (t, 2H,  $\text{CH}_2$ ), 3.13 (t, 2H,  $\text{CH}_2$ ), 7.18-7.29 (m, 7H, ArH), 7.53-7.58 (m, 2H, ArH);  $^{13}\text{C}$  NMR (100 MHz,  $\text{CDCl}_3$ ):  $\delta$  18.9, 27.0, 28.2, 81.7, 88.8, 114.6, 122.2, 123.5, 127.7, 128.2, 131.5, 154.4; EI-MS  $m/z$  260  $[\text{M}]^+$ ; HRMS (EI) calcd. for  $\text{C}_{18}\text{H}_{16}\text{N}_2$   $[\text{M}]^+$  260.1313, found 260.1303.

**5,6-Dimethyl-2-(5-phenylpent-4-ynyl)-1H-benzo[d]imidazole (A5)**

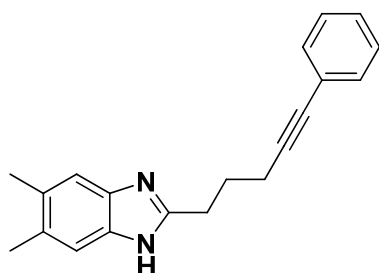

$^1\text{H}$  NMR (300 MHz,  $\text{DMSO}-d_6$ ):  $\delta$  2.02-2.07 (m, 2H,  $\text{CH}_2$ ), 2.28 (s, 6H,  $\text{CH}_3$ ), 2.54 (t, 2H,  $\text{CH}_2$ ), 2.94 (t, 2H,  $\text{CH}_2$ ), 7.18-7.40 (m, 7H, ArH), 12.08 (s, 1H, NH);  $^{13}\text{C}$  NMR (100 MHz,  $\text{DMSO}-d_6$ ):  $\delta$  18.3, 19.9, 26.6, 27.6, 81.0, 90.0, 110.9, 118.3, 123.2, 127.9, 128.5, 128.7, 131.2, 153.3; EI-MS  $m/z$  288  $[\text{M}]^+$ ; HRMS (EI) calcd. for  $\text{C}_{20}\text{H}_{20}\text{N}_2$   $[\text{M}]^+$  288.1626, found 288.1627.

**5, 6-Dichloro-2-(5-phenylpent-4-ynyl)-1H-benzo[d]imidazole (A6)**

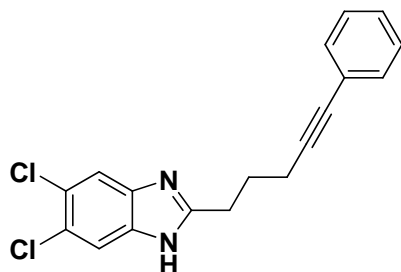

$^1\text{H}$  NMR (300 MHz,  $\text{CDCl}_3$ ):  $\delta$  2.10-2.17 (m, 2H,  $\text{CH}_2$ ), 2.48-2.52 (m, 2H,  $\text{CH}_2$ ), 3.11 (t, 2H,  $\text{CH}_2$ ), 7.18-7.26 (m, 5H, ArH), 7.59 (s, 2H, ArH);  $^{13}\text{C}$  NMR (100 MHz,  $\text{CDCl}_3$ ):  $\delta$  18.9, 26.8, 28.1, 82.0, 88.2, 115.9, 123.2, 126.3, 127.8, 128.2, 131.3, 137.9, 156.6; EI-MS  $m/z$  328  $[\text{M}]^+$ ; HRMS (EI) calcd. for  $\text{C}_{18}\text{H}_{14}\text{N}_2\text{Cl}_2$   $[\text{M}]^+$  328.0534, found



328.0532.

**2-(5-(4-Methoxyphenyl)pent-4-ynyl)-1H-benzo[d]imidazole (A7)**

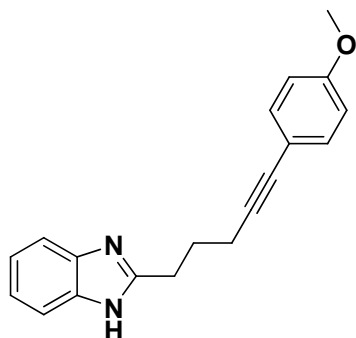

$^1\text{H}$  NMR (300 MHz,  $\text{CDCl}_3$ ):  $\delta$  2.12-2.19 (m, 2H,  $\text{CH}_2$ ), 2.47 (t, 2H,  $\text{CH}_2$ ), 3.14 (t, 2H,  $\text{CH}_2$ ), 3.76 (s, 3H,  $\text{CH}_3$ ), 6.73-6.75 (m, 2H, ArH), 7.18-7.23 (m, 4H, ArH), 7.54-7.57 (m, 2H, ArH);  $^{13}\text{C}$  NMR  $\delta$  (100 MHz,  $\text{CDCl}_3$ ): 19.0, 27.1, 28.2, 55.2, 81.5, 87.1, 113.7, 114.6, 115.6, 122.2, 132.8, 138.5, 154.5, 159.0; EI-MS  $m/z$  290  $[\text{M}]^+$ ; HRMS (EI) calcd. for  $\text{C}_{19}\text{H}_{18}\text{N}_2\text{O}$   $[\text{M}]^+$  290.1419, found 290.1421.

**2-(5-(2-(Trifluoromethyl)phenyl)pent-4-ynyl)-1H-benzo[d]imidazole (A8)**

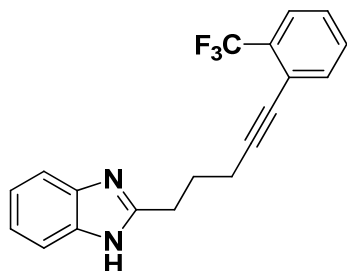

$^1\text{H}$  NMR (300 MHz,  $\text{CDCl}_3$ ):  $\delta$  2.14-2.24 (m, 2H,  $\text{CH}_2$ ), 2.56 (t, 2H,  $\text{CH}_2$ ), 3.16 (t, 2H,  $\text{CH}_2$ ), 7.20-7.30 (m, 2H, ArH), 7.35-7.66 (m, 6H, ArH);  $^{13}\text{C}$  NMR  $\delta$  (100 MHz,  $\text{CDCl}_3$ ): 18.9, 26.6, 27.7, 77.9, 95.0, 121.9, 122.2, 125.7 (d,  $J = 5.1$  Hz), 127.5, 131.4, 134.0, 154.1; EI-MS  $m/z$  328  $[\text{M}]^+$ ; HRMS (EI) calcd. for  $\text{C}_{19}\text{H}_{15}\text{N}_2\text{F}_3$   $[\text{M}]^+$  328.1187, found 328.1193.

**2-(5-(3-(Trifluoromethyl)phenyl)pent-4-ynyl)-1H-benzo[d]imidazole (A9)**

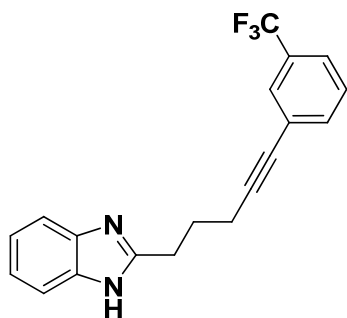

$^1\text{H}$  NMR (300 MHz,  $\text{CDCl}_3$ ):  $\delta$  2.16-2.25 (m, 2H,  $\text{CH}_2$ ), 2.52 (t, 2H,  $\text{CH}_2$ ), 3.16 (t, 2H,  $\text{CH}_2$ ), 7.18-7.24 (m, 2H, ArH), 7.30-7.35 (m, 2H, ArH), 7.46-7.49 (d,  $J = 7.5$  Hz, 1H, ArH), 7.52-7.58 (m, 3H, ArH);  $^{13}\text{C}$  NMR (100 MHz,  $\text{CDCl}_3$ ):  $\delta$  18.9, 27.0, 28.3, 80.2, 90.5, 114.6, 122.3, 124.2 (d,  $J = 3.2$  Hz), 124.4, 125.0, 128.1 (d,  $J = 3.8$  Hz), 128.6, 130.6 (d,  $J = 32.2$  Hz) 134.6, 138.5, 154.4; EI-MS  $m/z$  328  $[\text{M}]^+$ ; HRMS (EI) calcd. for  $\text{C}_{19}\text{H}_{15}\text{N}_2\text{F}_3$   $[\text{M}]^+$  328.1187, found 328.1184.

**2-(5-(4-(Trifluoromethyl)phenyl)pent-4-ynyl)-1H-benzo[d]imidazole (A10)**

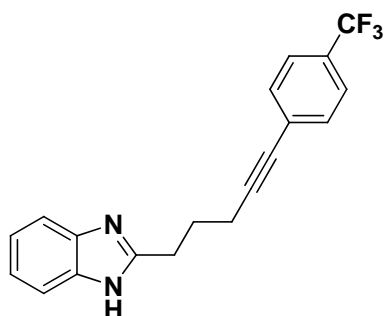

$^1\text{H}$  NMR (300 MHz,  $\text{CDCl}_3$ ):  $\delta$  2.16-2.26 (m, 2H,  $\text{CH}_2$ ), 2.51 (t, 2H,  $\text{CH}_2$ ), 3.18 (t, 2H,  $\text{CH}_2$ ), 7.19-7.23 (m, 4H, ArH), 7.41-7.43 (d,  $J = 8.1$  Hz, 2H, ArH), 7.56-7.59 (m, 2H, ArH);  $^{13}\text{C}$  NMR (100 MHz,  $\text{CDCl}_3$ ):  $\delta$  19.0, 27.0, 28.3, 80.5, 91.4, 114.5, 122.3, 123.9 (d,  $J = 270.8$  Hz), 125.0 (d,  $J = 3.6$  Hz), 127.2, 129.3 (d,  $J = 32.6$  Hz), 131.6, 138.5, 154.4; EI-MS  $m/z$  328  $[\text{M}]^+$ ; HRMS (EI) calcd. for  $\text{C}_{19}\text{H}_{15}\text{N}_2\text{F}_3$   $[\text{M}]^+$  328.1187, found 328.1186.

**2-(5-(4-Chlorophenyl)pent-4-ynyl)-1H-benzo[d]imidazole (A11)**

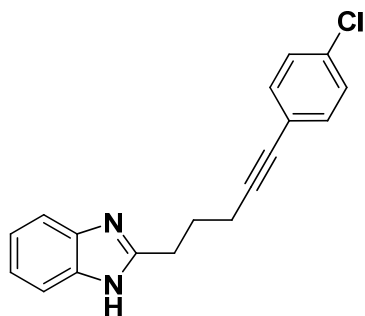

$^1\text{H}$  NMR (300 MHz,  $\text{CDCl}_3$ ):  $\delta$  2.14-2.18 (m, 2H,  $\text{CH}_2$ ), 2.45-2.48 (m, 2H,  $\text{CH}_2$ ), 3.17 (m, 2H,  $\text{CH}_2$ ), 7.08-7.15 (m, 4H, ArH), 7.21 (br, 2H, ArH), 7.56 (br, 2H, ArH);  $^{13}\text{C}$  NMR (100 MHz,  $\text{CDCl}_3$ ):  $\delta$  18.9, 26.9, 27.7, 80.7, 89.5, 114.4, 121.8, 123.1, 128.4, 132.6, 133.6, 136.8, 154.0; EI-MS  $m/z$  294  $[\text{M}]^+$ ; HRMS (EI) calcd. for  $\text{C}_{18}\text{H}_{15}\text{N}_2\text{Cl}$   $[\text{M}]^+$  294.0924, found 294.0890.

**2-(5-(Pyridin-3-yl)pent-4-ynyl)-1H-benzo[d]imidazole (A12)**

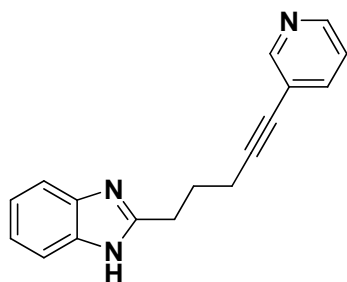

$^1\text{H}$  NMR (300 MHz,  $\text{CDCl}_3$ ):  $\delta$  2.15-2.24 (m, 2H,  $\text{CH}_2$ ), 2.52 (t, 2H,  $\text{CH}_2$ ), 3.13 (t, 2H,  $\text{CH}_2$ ), 7.01-7.03 (m, 2H, ArH), 7.17-7.23 (m, 2H, ArH), 7.52-7.57 (m, 2H, ArH), 8.44-8.46 (m, 2H, ArH);  $^{13}\text{C}$  NMR (100 MHz,  $\text{CDCl}_3$ ):  $\delta$  18.9, 26.7, 28.1, 79.027, 95.0, 114.6, 122.0, 125.9, 132.3, 148.9, 154.3; EI-MS  $m/z$  261  $[\text{M}]^+$ ; HRMS (EI) calcd. for  $\text{C}_{17}\text{H}_{15}\text{N}_3$   $[\text{M}]^+$  261.1266, found 261.1257.

**2-(Pent-4-ynyl)-1H-naphtho[2,3-d]imidazole (A13)**

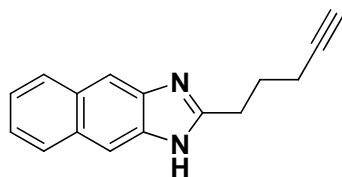

$^1\text{H}$  NMR (300 MHz,  $\text{CDCl}_3$ ):  $\delta$  2.04 (m, 1H, CH), 2.14-2.19 (m, 2H,  $\text{CH}_2$ ), 2.35-2.39 (m, 2H,  $\text{CH}_2$ ), 3.15 (t, 2H,  $\text{CH}_2$ ), 7.39-7.42 (m, 2H, ArH), 7.92-7.96 (m, 2H, ArH),

7.99 (s, 2H, ArH);  $^{13}\text{C}$  NMR (100 MHz,  $\text{CDCl}_3$ ):  $\delta$  17.9, 26.3, 28.1, 69.8, 83.2, 110.9, 123.9, 127.9, 130.4, 158.0; ESI-MS  $m/z$  235  $[\text{M} + \text{H}]^+$ ; HRMS (ESI) calcd. for  $\text{C}_{16}\text{H}_{15}\text{N}_2$   $[\text{M} + \text{H}]^+$  235.1235, found 235.1232.

**2-(5-Phenylpent-4-ynyl)-1*H*-naphtho[2,3-*d*]imidazole (A14)**

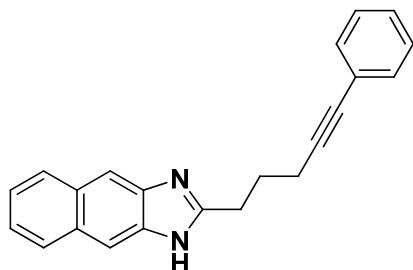

$^1\text{H}$  NMR (300 MHz,  $\text{DMSO}-d_6$ ):  $\delta$  2.26-2.31 (m, 2H,  $\text{CH}_2$ ), 2.66 (t, 2H,  $\text{CH}_2$ ), 3.41 (t, 2H,  $\text{CH}_2$ ), 7.19-7.25 (m, 5H, ArH), 7.55-7.58 (m, 2H, ArH), 8.15-8.18 (m, 2H, ArH), 8.32 (s, 2H, ArH);  $^{13}\text{C}$  NMR (100 MHz,  $\text{DMSO}-d_6$ ):  $\delta$  18.3, 25.3, 26.0, 81.5, 89.0, 110.4, 122.7, 125.5, 127.9, 128.1, 128.3, 130.6, 130.7, 131.1, 158.3; EI-MS  $m/z$  310  $[\text{M}]^+$ ; HRMS (EI) calcd. for  $\text{C}_{22}\text{H}_{18}\text{N}_2$   $[\text{M}]^+$  310.1470, found 310.1468.

**2-(Pent-4-ynyl)-1*H*-perimidine (A15)**

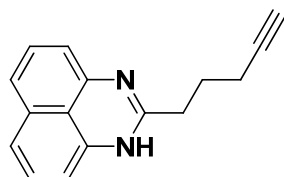

$^1\text{H}$  NMR (300 MHz,  $\text{CDCl}_3$ ):  $\delta$  1.92-2.00 (m, 3H, CH,  $\text{CH}_2$ ), 2.26-2.31 (m, 2H,  $\text{CH}_2$ ), 2.47 (t, 2H,  $\text{CH}_2$ ), 6.52-6.54 (m, 2H, ArH), 7.07-7.16 (m, 4H, ArH);  $^{13}\text{C}$  NMR  $\delta$  (100 MHz,  $\text{CDCl}_3$ ): 17.9, 25.8, 34.2, 69.6, 83.0, 107.7, 119.4, 121.8, 128.2, 135.3, 140.6, 156.9; EI-MS  $m/z$  234  $[\text{M}]^+$ ; HRMS (EI) calcd. for  $\text{C}_{16}\text{H}_{14}\text{N}_2$   $[\text{M}]^+$  234.1157, found 234.1149.

***N*-(Prop-2-ynyl)benzo[*d*]thiazol-2-amine (A16)**

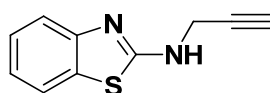

$^1\text{H}$  NMR (300 MHz,  $\text{CDCl}_3$ ):  $\delta$  2.33 (t, 1H, CH), 4.29 (d,  $J = 2.7$  Hz, 2H,  $\text{CH}_2$ ), 7.11-7.16 (t, 1H, ArH), 7.27-7.35 (t, 1H, ArH), 7.60-7.63 (d,  $J = 8.1$  Hz, 2H, ArH);  $^{13}\text{C}$  NMR (100 MHz,  $\text{CDCl}_3$ ):  $\delta$  34.5, 72.5, 79.1, 119.4, 120.9, 122.1, 126.0, 130.8,

152.0, 166.2; EI-MS  $m/z$  188  $[M]^+$ ; HRMS (EI) calcd. for  $C_{10}H_8N_2S$   $[M]^+$  188.0408, found 188.0406.

**2-((Prop-2-ynyloxy)methyl)-1*H*-benzo[*d*]imidazole (A17)**

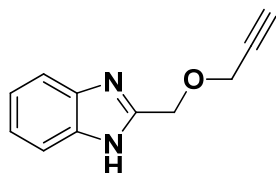

$^1H$  NMR (300 MHz,  $CDCl_3$ ):  $\delta$  2.39 (t, 1H, CH), 4.24 (d,  $J = 2.1$  Hz, 2H,  $CH_2$ ), 4.97 (s, 2H,  $CH_2$ ), 7.27-7.29 (m, 2H, ArH), 7.64-7.68 (m, 2H, ArH);  $^{13}C$  NMR (100 MHz,  $CDCl_3$ ):  $\delta$  58.0, 65.0, 75.5, 78.5, 115.1, 122.5, 138.2, 151.0; EI-MS  $m/z$  186  $[M]^+$ ; HRMS (EI) calcd. for  $C_{11}H_{10}N_2O$   $[M]^+$  186.0793, found 186.0787.

**5,6-Dimethyl-2-((prop-2-ynyloxy)methyl)-1*H*-benzo[*d*]imidazole (A18)**

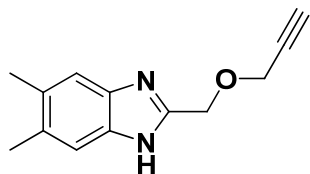

$^1H$  NMR (300 MHz,  $CDCl_3$ ):  $\delta$  2.36 (s, 6H,  $CH_3$ ), 2.49 (t, 1H, CH), 4.28 (d,  $J = 2.1$  Hz, 2H,  $CH_2$ ), 4.88 (s, 2H,  $CH_2$ ), 7.35 (s, 2H, ArH);  $^{13}C$  NMR (100 MHz,  $CDCl_3$ ):  $\delta$  20.3, 58.2, 65.5, 75.5, 78.7, 115.2, 131.6, 136.8, 149.8; EI-MS  $m/z$  214  $[M]^+$ ; HRMS (EI) calcd. for  $C_{13}H_{14}N_2O$   $[M]^+$  214.1106, found 214.1099.

**5,6-Dichloro-2-((prop-2-ynyloxy)methyl)-1*H*-benzo[*d*]imidazole (A19)**

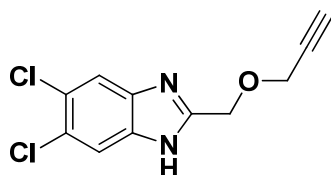

$^1H$  NMR (300 MHz,  $CDCl_3$ ):  $\delta$  2.49 (t, 1H, CH), 4.30 (d,  $J = 2.7$  Hz, 2H,  $CH_2$ ), 4.89 (s, 2H,  $CH_2$ ), 7.68 (s, 2H, ArH);  $^{13}C$  NMR (100 MHz,  $CDCl_3$ ):  $\delta$  58.7, 65.3, 76.1, 78.2, 126.8, 153.1; EI-MS  $m/z$  254  $[M]^+$ ; HRMS (EI) calcd. for  $C_{11}H_8Cl_2N_2O$   $[M]^+$  254.0014, found 254.0012.

**2-((But-2-ynyloxy)methyl)-1*H*-benzo[*d*]imidazole (A20)**

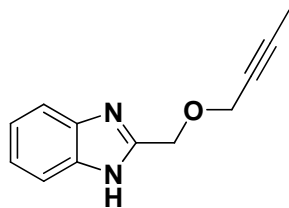

$^1\text{H}$  NMR (300 MHz,  $\text{CDCl}_3$ ):  $\delta$  1.76 (m, 3H,  $\text{CH}_3$ ), 4.23 (m, 2H,  $\text{CH}_2$ ), 4.91 (s, 2H,  $\text{CH}_2$ ), 7.23-7.26 (m, 2H, ArH), 7.59-7.62 (m, 2H, ArH);  $^{13}\text{C}$  NMR (100 MHz,  $\text{CDCl}_3$ ):  $\delta$  3.3, 58.8, 65.0, 74.0, 83.7, 115.1, 122.4, 138.3, 151.4; EI-MS  $m/z$  200  $[\text{M}]^+$ ; HRMS (EI) calcd. for  $\text{C}_{12}\text{H}_{12}\text{N}_2\text{O}$   $[\text{M}]^+$  200.0950, found 200.0950.

**2-((But-2-ynyloxy)methyl)-5,6-dimethyl-1H-benzo[d]imidazole (A21)**

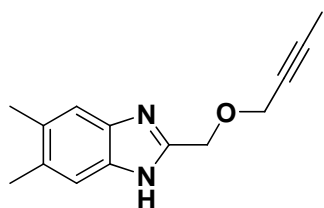

$^1\text{H}$  NMR (300 MHz,  $\text{CDCl}_3$ ):  $\delta$  1.79 (t, 3H,  $\text{CH}_3$ ), 2.36 (s, 6H,  $\text{CH}_3$ ), 4.22 (m, 2H,  $\text{CH}_2$ ), 4.88 (s, 2H,  $\text{CH}_2$ ), 7.37 (s, 2H, ArH);  $^{13}\text{C}$  NMR  $\delta$  (100 MHz,  $\text{CDCl}_3$ ): 3.4, 20.3, 58.7, 65.2, 74.2, 83.7, 131.4, 150.3; EI-MS  $m/z$  228  $[\text{M}]^+$ ; HRMS (EI) calcd. for  $\text{C}_{14}\text{H}_{16}\text{N}_2\text{O}$   $[\text{M}]^+$  228.1263, found 228.1270.

**2-((But-2-ynyloxy)methyl)-5,6-dichloro-1H-benzo[d]imidazole (A22)**

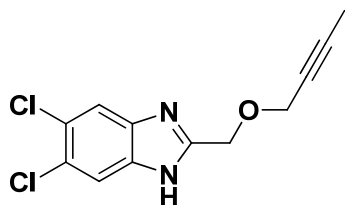

$^1\text{H}$  NMR (300 MHz,  $\text{CDCl}_3$ ):  $\delta$  1.83 (s, 3H,  $\text{CH}_3$ ), 4.28 (s, 2H,  $\text{CH}_2$ ), 4.88 (s, 2H,  $\text{CH}_2$ ), 7.68 (s, 2H, ArH);  $^{13}\text{C}$  NMR (100 MHz,  $\text{CDCl}_3$ ):  $\delta$  3.6, 59.3, 65.1, 73.7, 84.4, 126.6, 153.5; EI-MS  $m/z$  268  $[\text{M}]$ ; HRMS (EI) calcd. for  $\text{C}_{12}\text{H}_{10}\text{Cl}_2\text{N}_2\text{O}$   $[\text{M}]^+$  268.0170, found 268.0177.

**2-((3-Phenylprop-2-ynyloxy)methyl)-1H-benzo[d]imidazole (A23)**

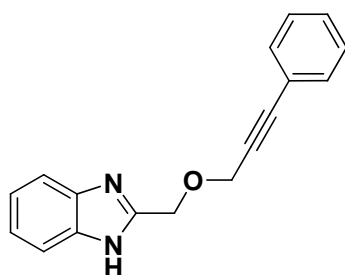

$^1\text{H}$  NMR (300 MHz,  $\text{CDCl}_3$ ):  $\delta$  4.50 (s, 2H,  $\text{CH}_2$ ), 5.01 (s, 2H,  $\text{CH}_2$ ), 7.24-7.30 (m, 5H, ArH), 7.31-7.35 (m, 2H, ArH), 7.60-7.61 (br, 2H, ArH);  $^{13}\text{C}$  NMR (100 MHz,  $\text{CDCl}_3$ ):  $\delta$  59.2, 65.6, 83.9, 87.3, 122.0, 122.6, 128.2, 128.6, 131.7, 151.1; EI-MS  $m/z$  262  $[\text{M}]^+$ ; HRMS (EI) calcd. for  $\text{C}_{17}\text{H}_{14}\text{N}_2\text{O}$   $[\text{M}]^+$  262.1106, found 262.1098.

**2-((3-(2-(Trifluoromethyl)phenyl)prop-2-ynyloxy)methyl)-1H-benzo[d]imidazole (A24)**

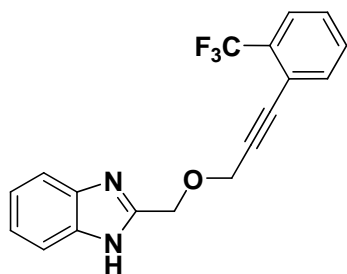

$^1\text{H}$  NMR (300 MHz,  $\text{CDCl}_3$ ):  $\delta$  4.52 (s, 2H,  $\text{CH}_2$ ), 5.02 (s, 2H,  $\text{CH}_2$ ), 7.22-7.27 (m, 2H, ArH), 7.37-7.41 (m, 3H, ArH), 7.59-7.63 (m, 3H, ArH);  $^{13}\text{C}$  NMR (100 MHz,  $\text{CDCl}_3$ ):  $\delta$  59.0, 65.5, 83.1, 89.6, 113.0, 120.2, 122.6, 123.4 (d,  $J = 271.4$  Hz), 125.7 (d,  $J = 5.0$  Hz), 127.4, 128.3, 131.35, 131.4 (d,  $J = 30.0$  Hz), 134.0, 151.0; EI-MS  $m/z$  330  $[\text{M}]^+$ ; HRMS (EI) calcd. for  $\text{C}_{18}\text{H}_{13}\text{F}_3\text{N}_2\text{O}$   $[\text{M}]^+$  330.0980, found 330.0973.

**2-((3-(4-(Trifluoromethyl)phenyl)prop-2-ynyloxy)methyl)-1H-benzo[d]imidazole (A25)**

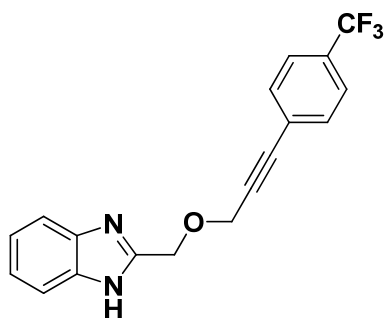

$^1\text{H}$  NMR (300 MHz,  $\text{CDCl}_3$ ):  $\delta$  4.53 (s, 2H,  $\text{CH}_2$ ), 5.00 (s, 2H,  $\text{CH}_2$ ), 7.25-7.28 (m, 2H, ArH), 7.39-7.42 (d,  $J = 7.8$  Hz, 2H, ArH), 7.51-7.53 (d,  $J = 8.4$  Hz, 2H, ArH), 7.60-7.62 (m, 2H, ArH);  $^{13}\text{C}$  NMR (100 MHz,  $\text{CDCl}_3$ ):  $\delta$  59.1, 65.8, 86.0, 86.3, 122.8, 125.2 (d,  $J = 3.6$  Hz), 125.8, 131.9, 150.8; EI-MS  $m/z$  330  $[\text{M}]^+$ ; HRMS (EI) calcd. for  $\text{C}_{18}\text{H}_{13}\text{F}_3\text{N}_2\text{O}$   $[\text{M}]^+$  330.0980, found 330.0985.

**2-((3-(4-Chlorophenyl)prop-2-ynyloxy)methyl)-1H-benzo[d]imidazole (A26)**

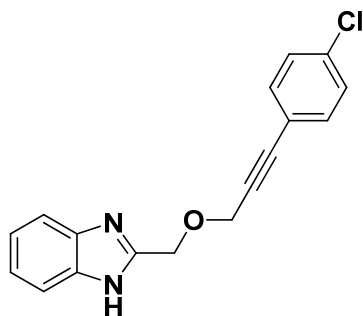

$^1\text{H}$  NMR (300 MHz,  $\text{CDCl}_3$ ):  $\delta$  4.50 (s, 2H,  $\text{CH}_2$ ), 4.98 (s, 2H,  $\text{CH}_2$ ), 7.24-7.28 (m, 6H, ArH), 7.59-7.62 (m, 2H, ArH);  $^{13}\text{C}$  NMR (100 MHz,  $\text{CDCl}_3$ ):  $\delta$  59.2, 65.7, 84.8, 86.3, 115.2, 120.5, 122.7, 128.6, 132.9, 134.7, 150.9; EI-MS  $m/z$  296  $[\text{M}]^+$ ; HRMS (EI) calcd. for  $\text{C}_{17}\text{H}_{13}\text{ClN}_2\text{O}$   $[\text{M}]^+$  296.0716, found 296.0710.

**2-((Prop-2-ynyloxy)methyl)-1H-naphtho[2,3-*d*]imidazole (A27)**

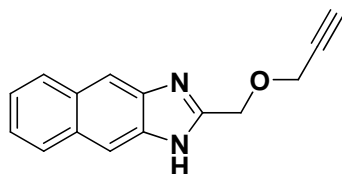

$^1\text{H}$  NMR (300 MHz,  $\text{CDCl}_3$ ):  $\delta$  2.49 (s, 1H, CH), 4.34 (s, 2H,  $\text{CH}_2$ ), 4.99 (s, 2H,  $\text{CH}_2$ ), 7.39-7.43 (m, 2H, ArH), 7.93-7.96 (m, 2H, ArH), 8.04 (s, 2H, ArH);  $^{13}\text{C}$  NMR (100 MHz,  $\text{CDCl}_3$ ):  $\delta$  58.7, 65.7, 75.9, 78.4, 124.0, 127.9, 130.5, 155.2; EI-MS  $m/z$  236  $[\text{M}]^+$ ; HRMS (EI) calcd. for  $\text{C}_{15}\text{H}_{12}\text{N}_2\text{O}$   $[\text{M}]^+$  236.0950, found 236.0944.



# Copies of $^1\text{H}$ NMR and $^{13}\text{C}$ NMR of A1-A27

## 2-(Pent-4-ynyl)-1*H*-benzo[d]imidazole (A1)

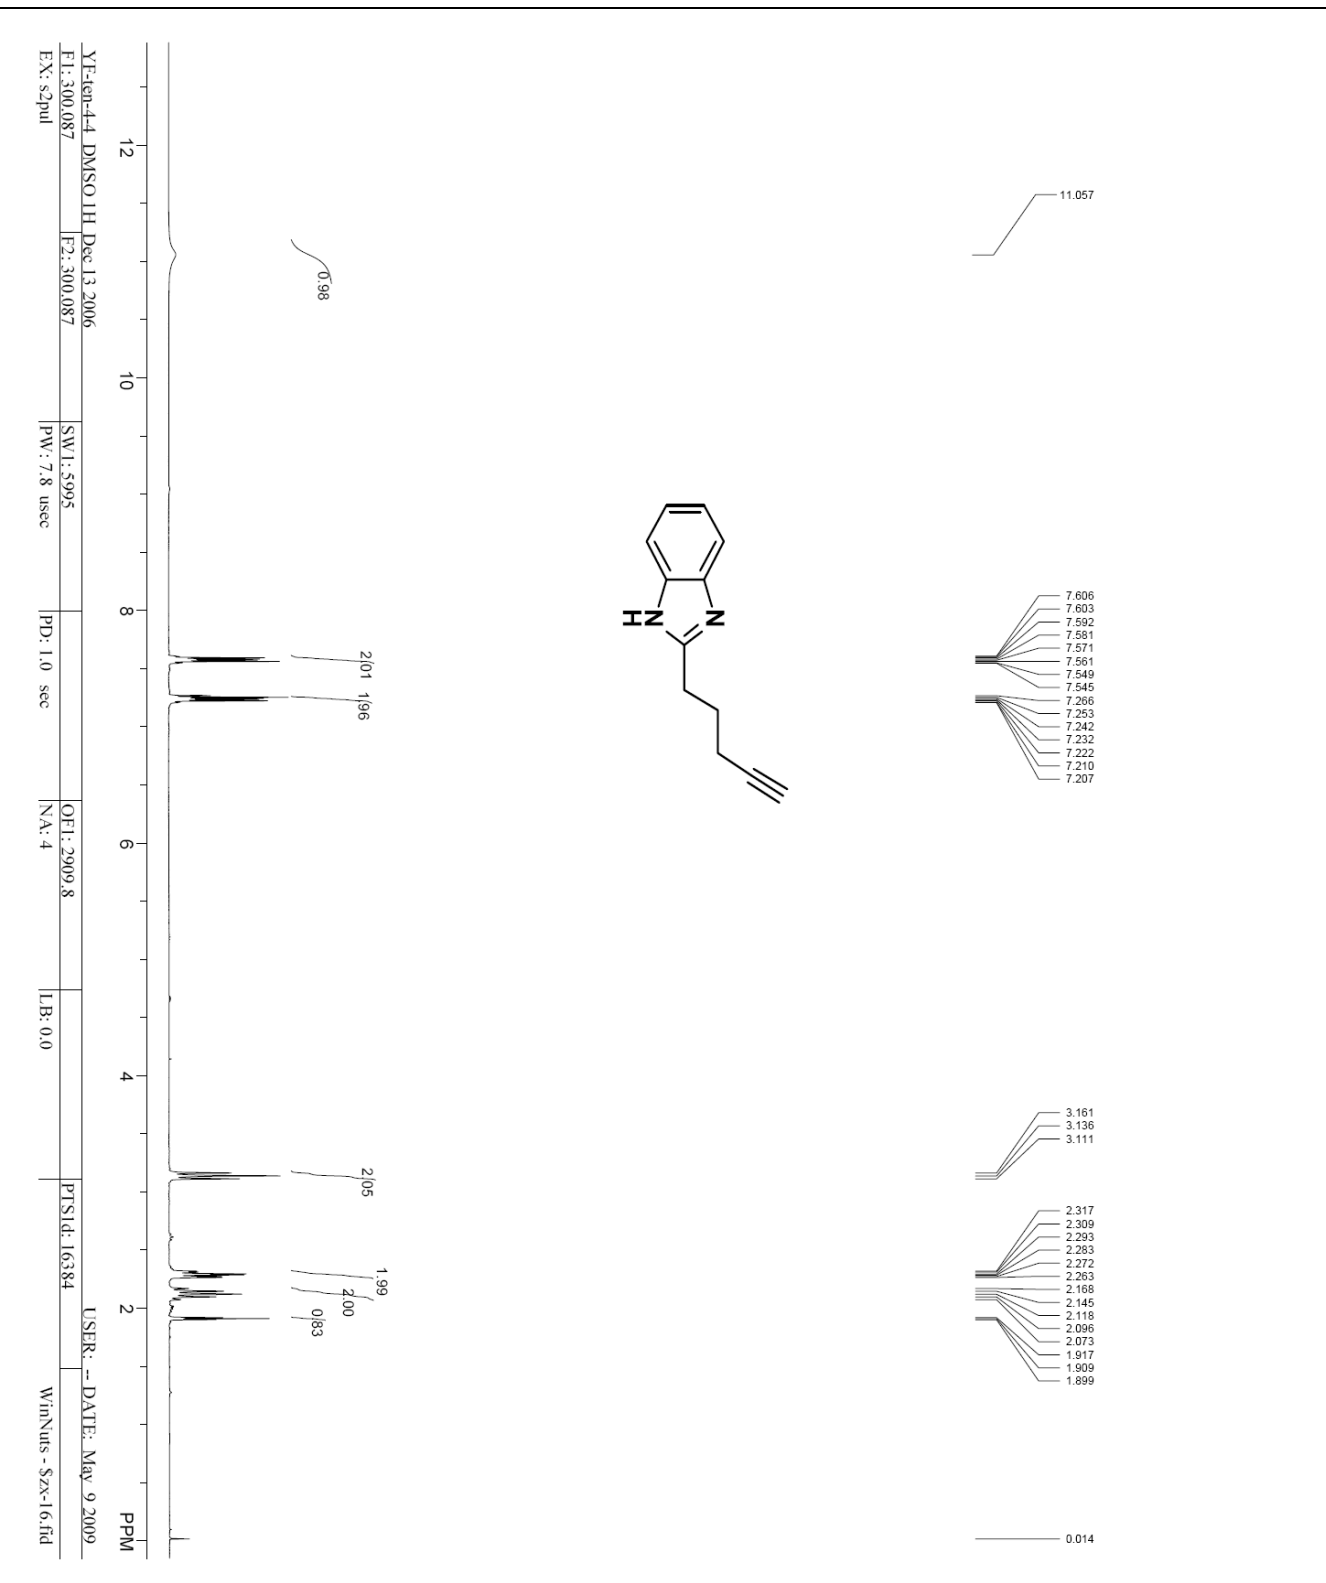

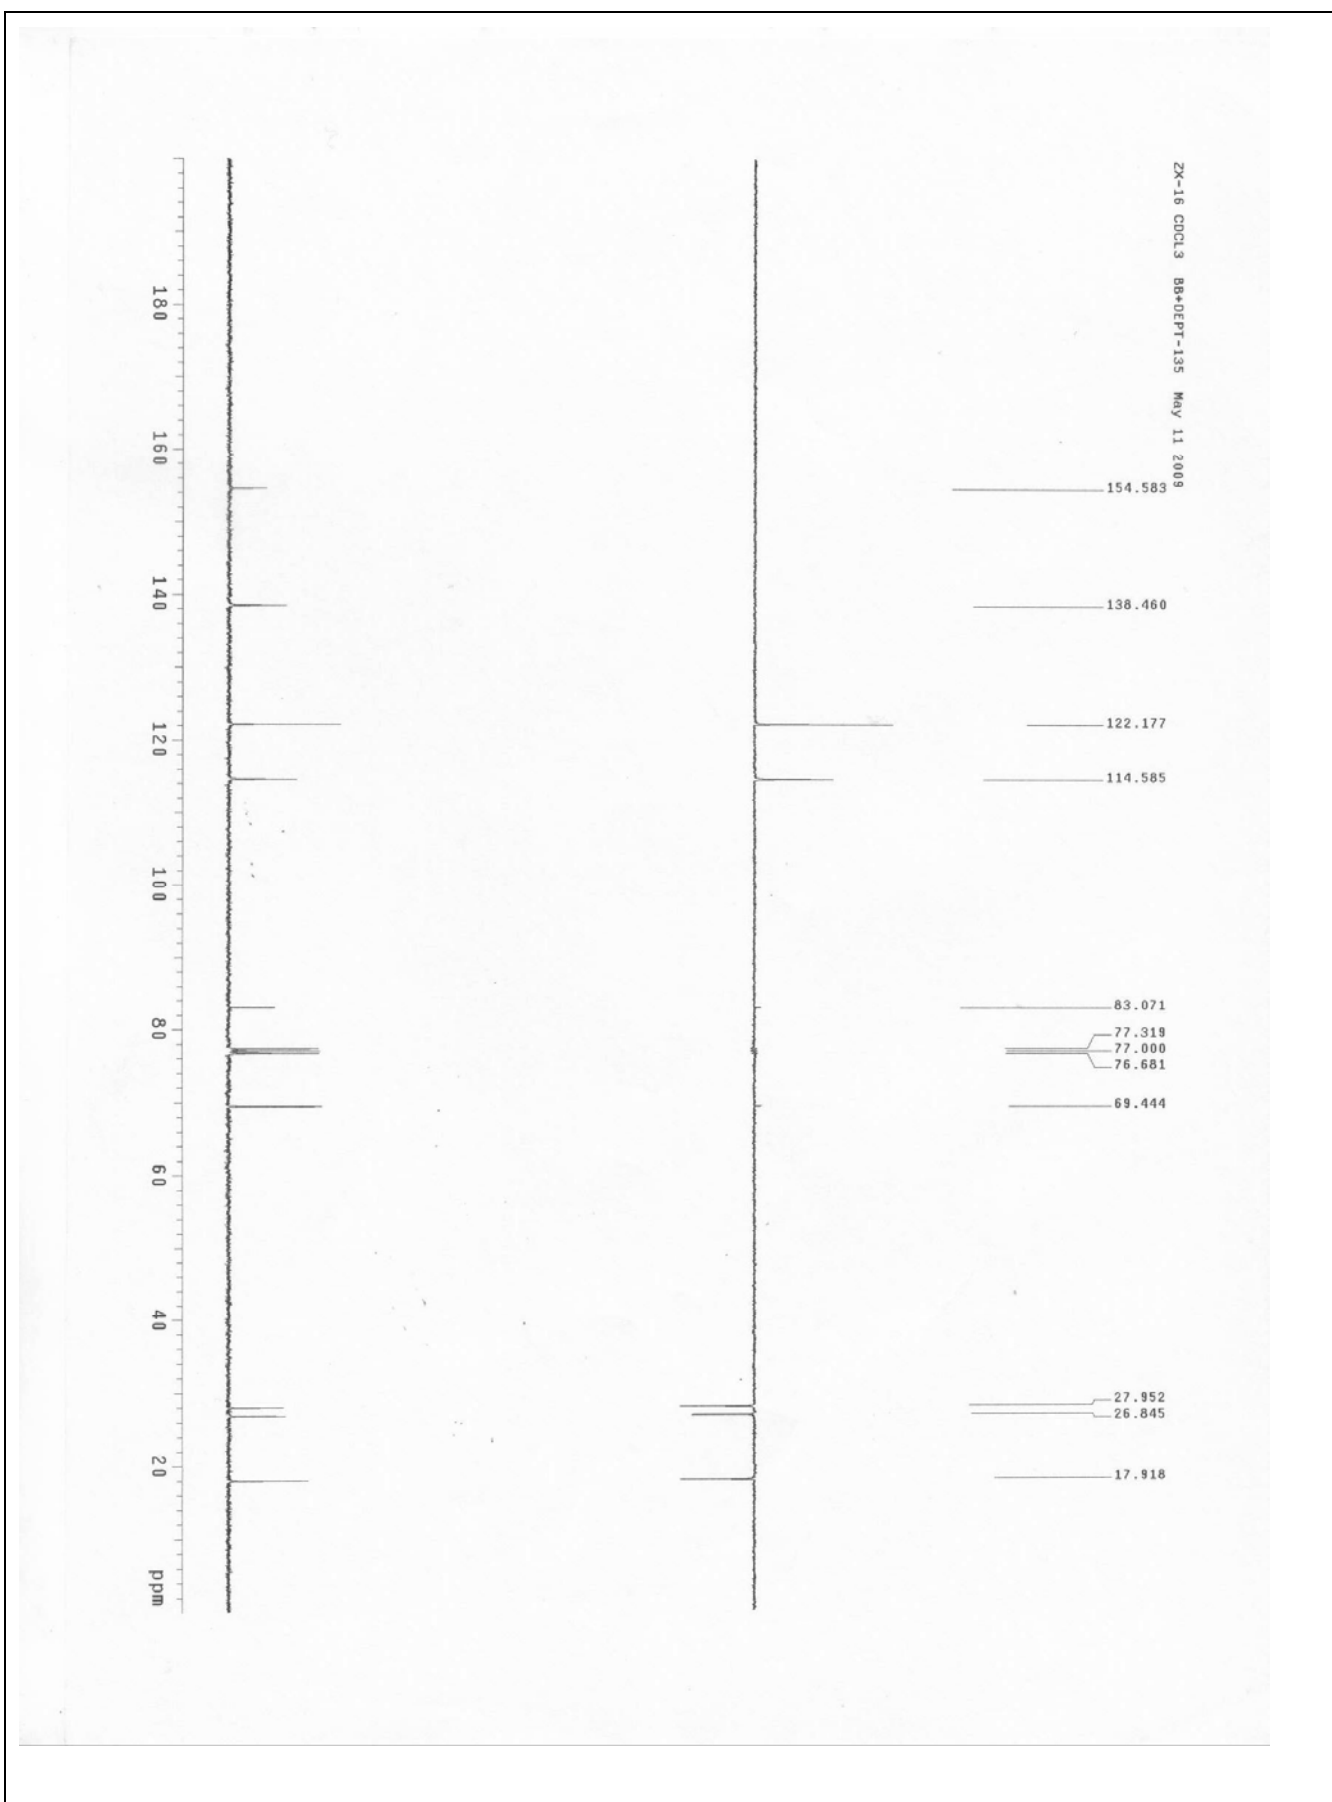

# 5,6-Dimethyl-2-(pent-4-ynyl)-1H-benzo[d]imidazole (A2)

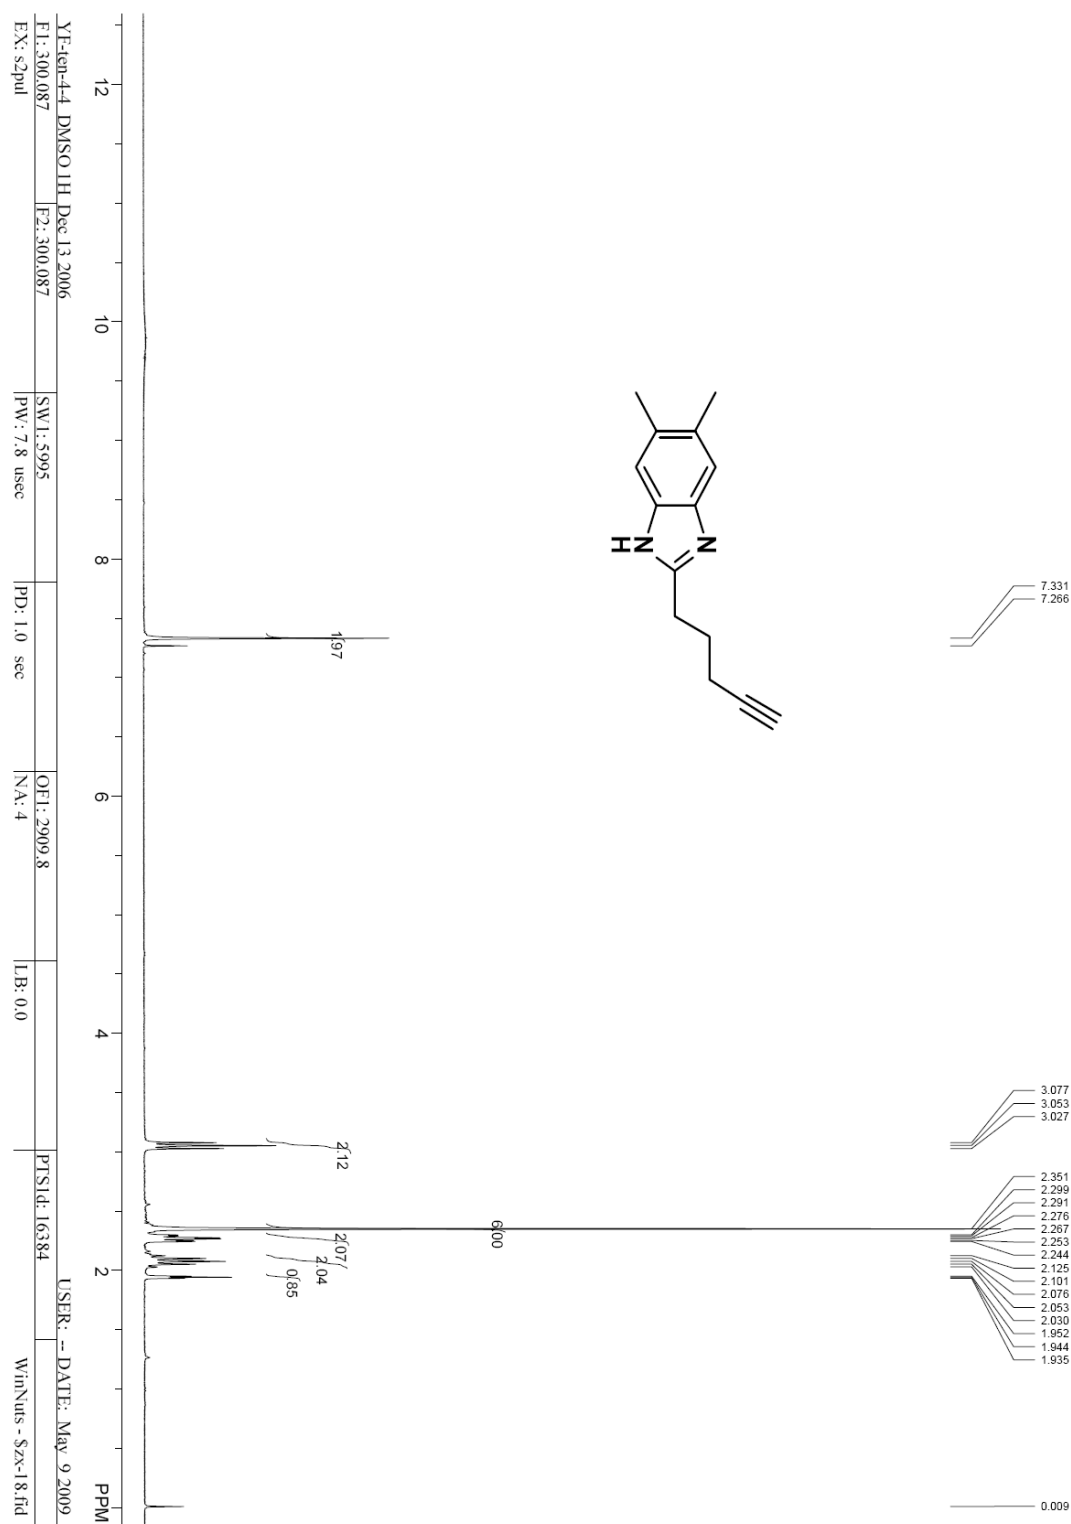

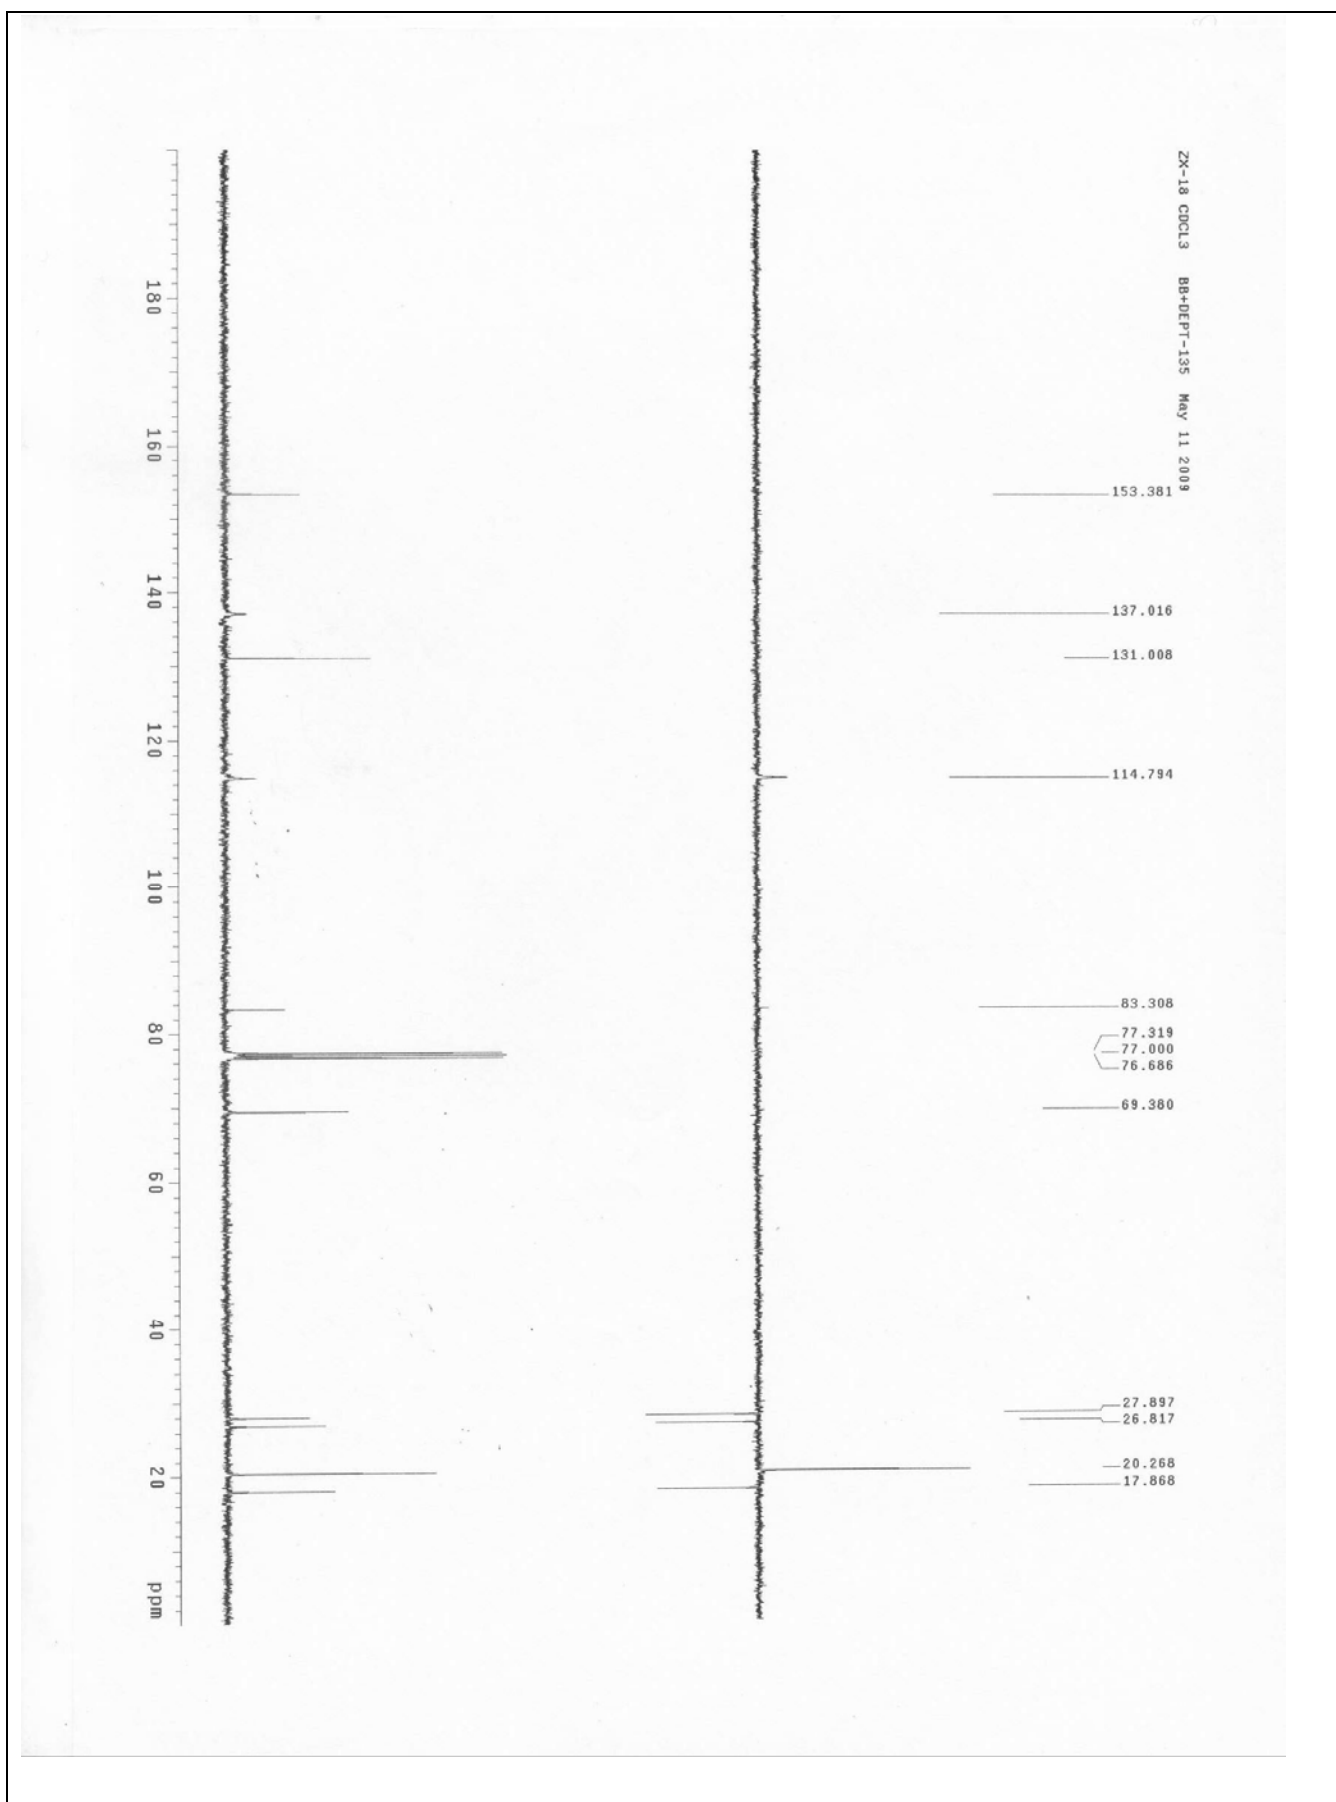

# 5, 6-Dichloro-2-(pent-4-ynyl)-1H-benzo[d]imidazole (A3)

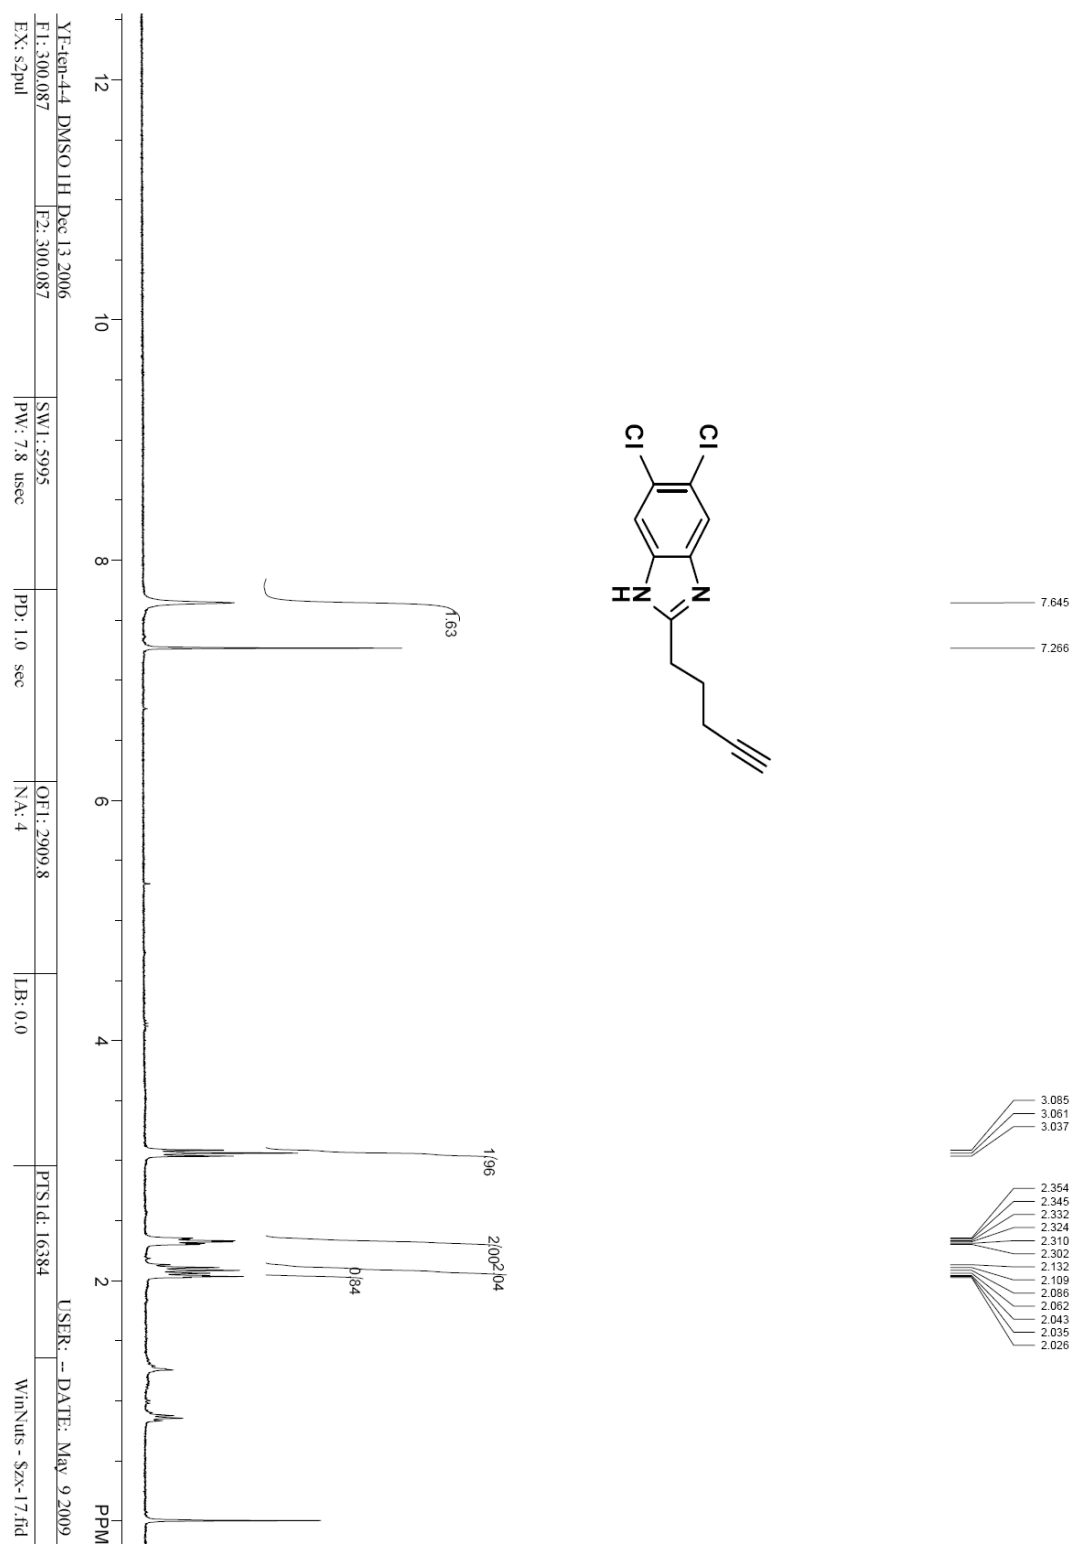

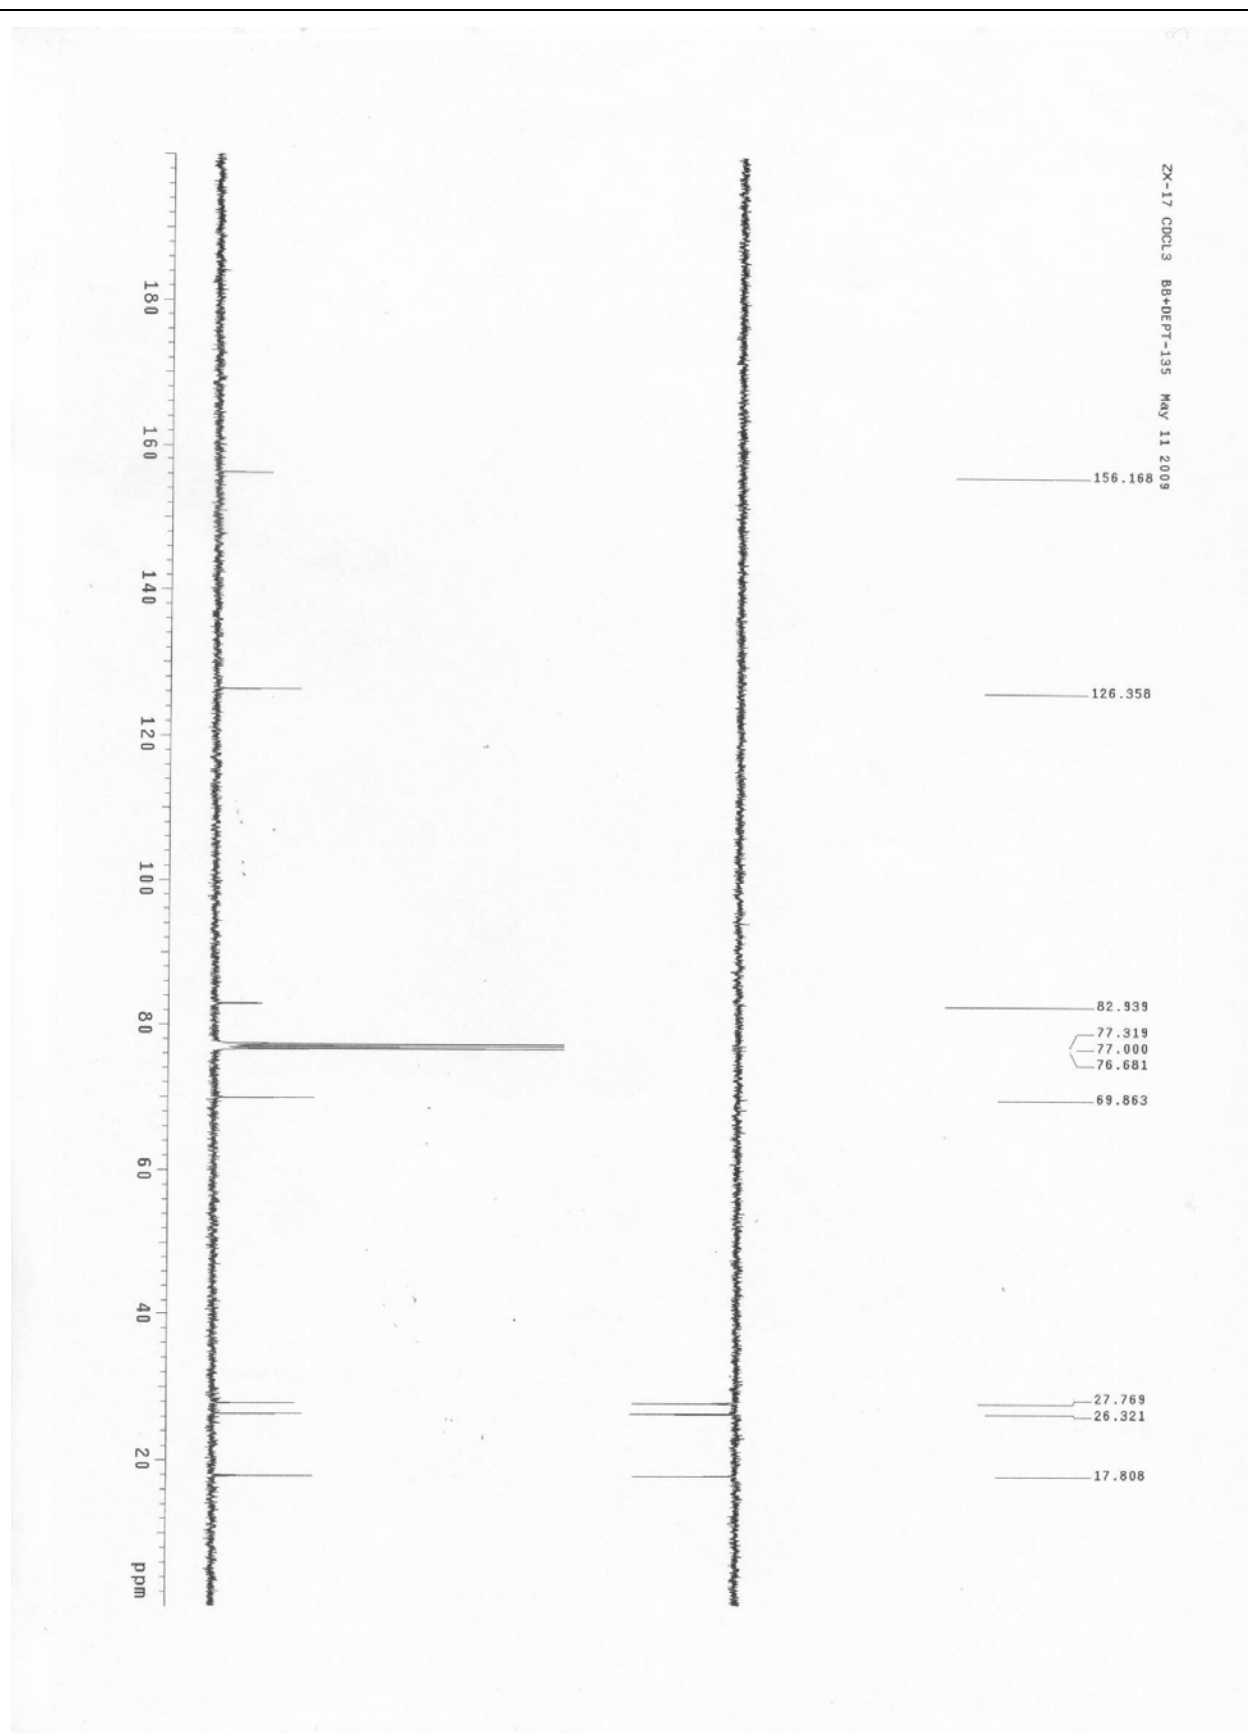

## 2-(5-Phenylpent-4-ynyl)-1H-benzo[d]imidazole (A4)

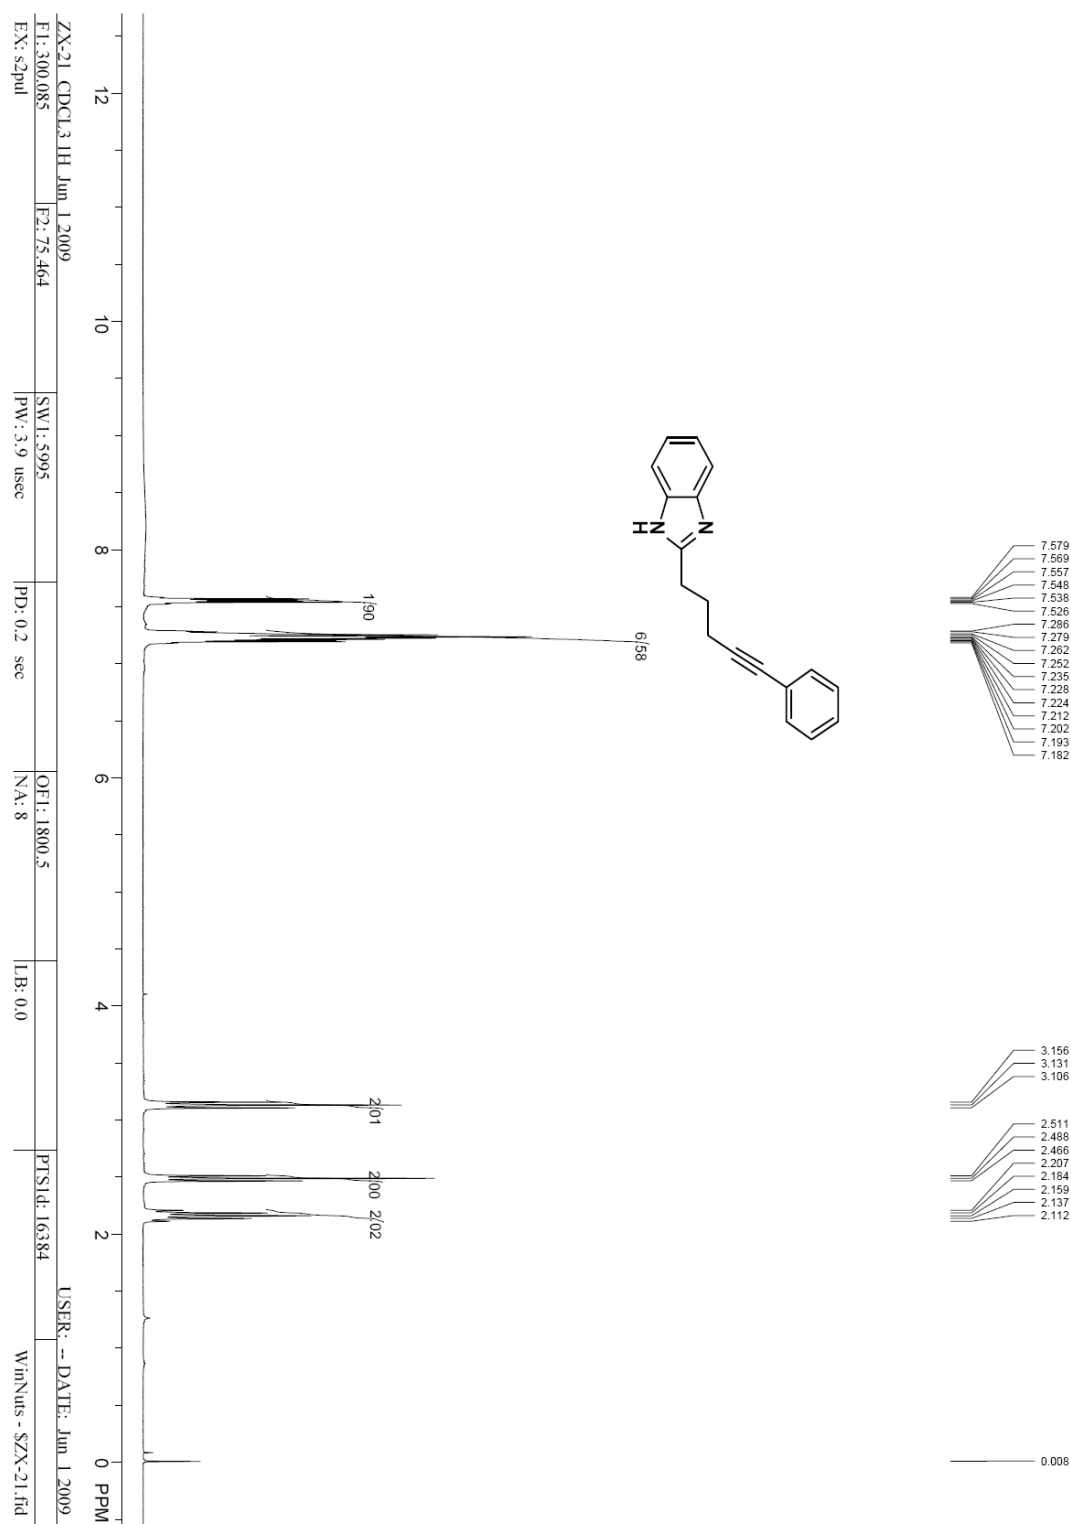

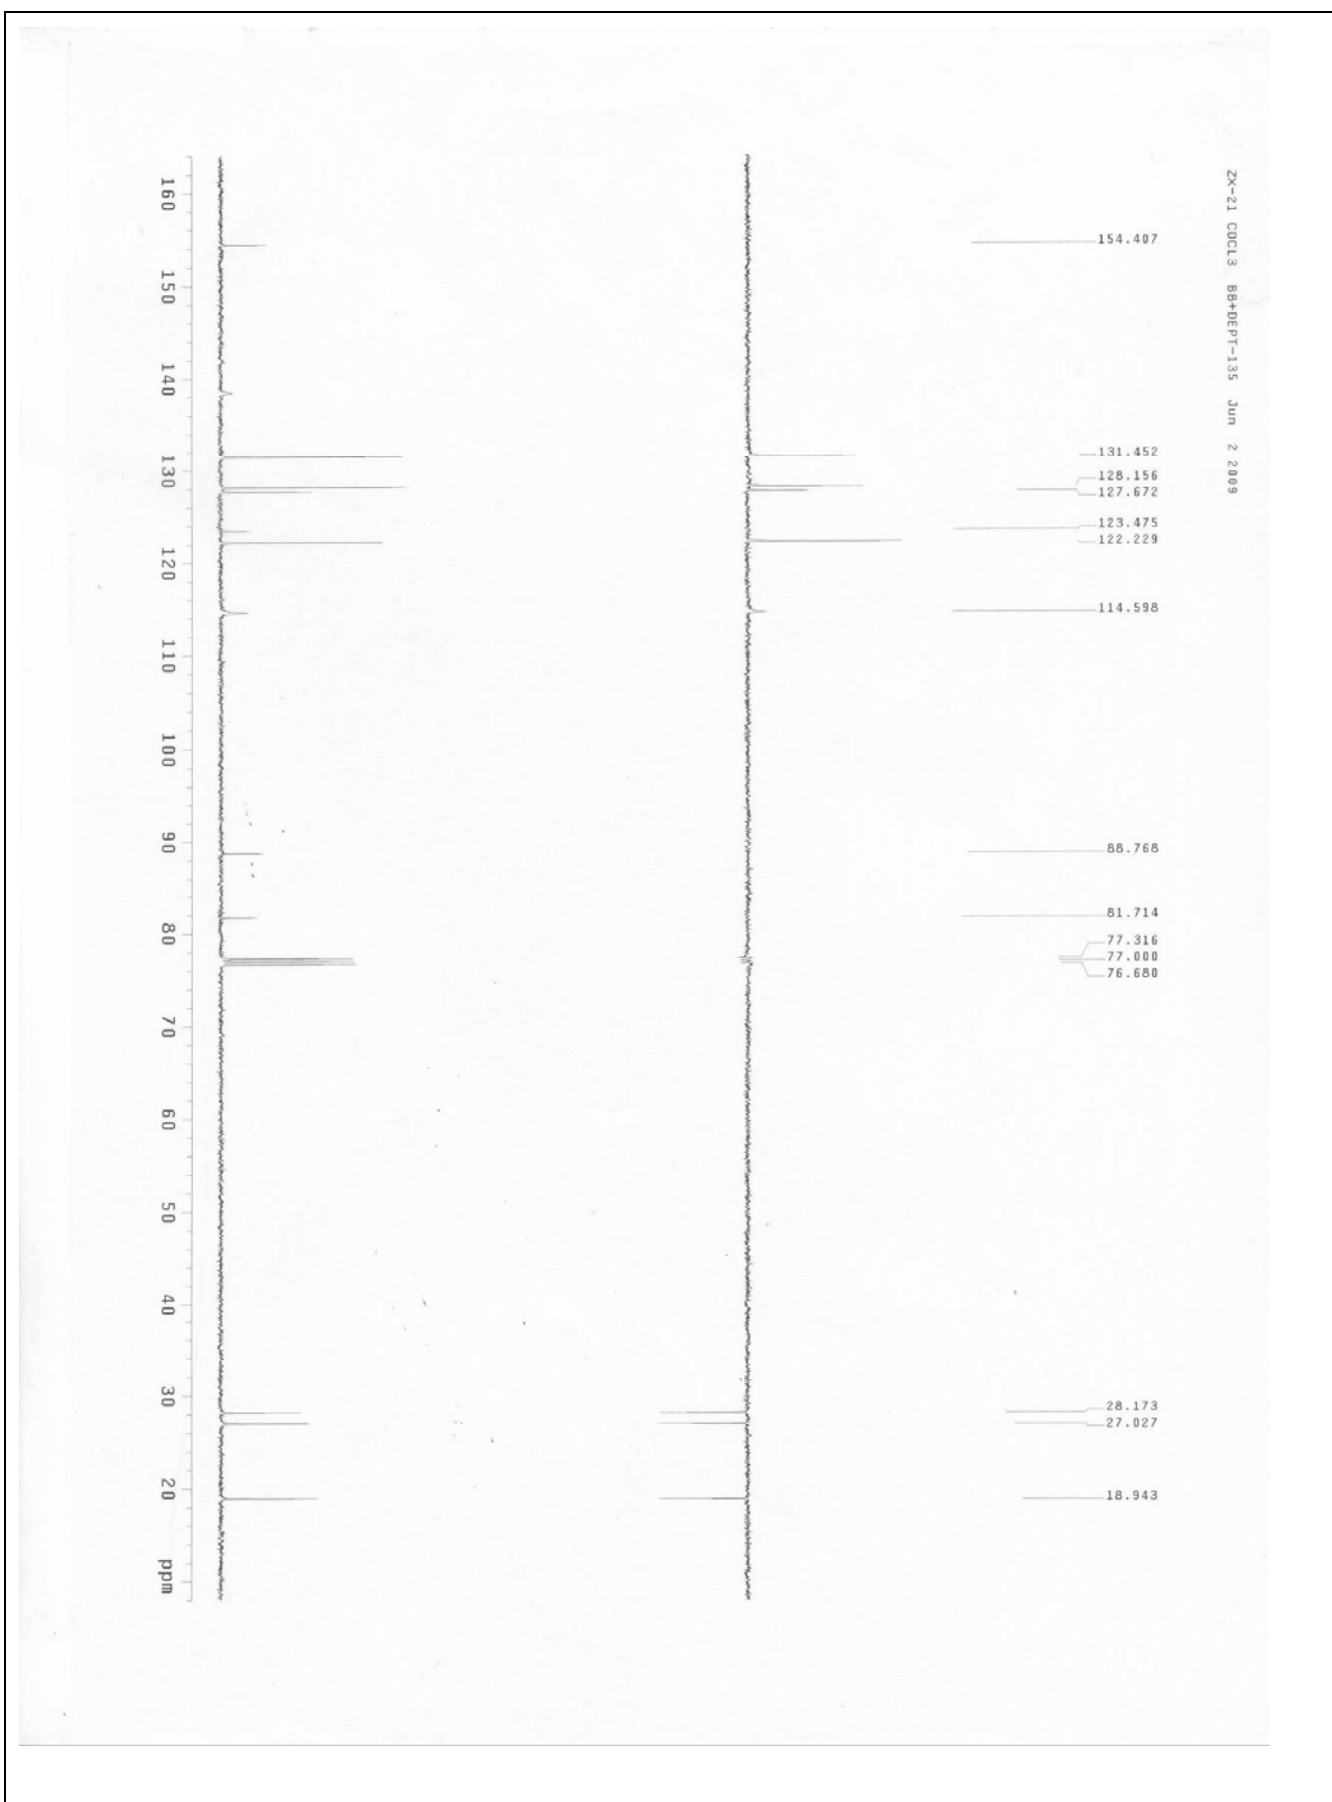



# 5,6-Dimethyl-2-(5-phenylpent-4-ynyl)-1H-benzo[d]imidazole (A5)

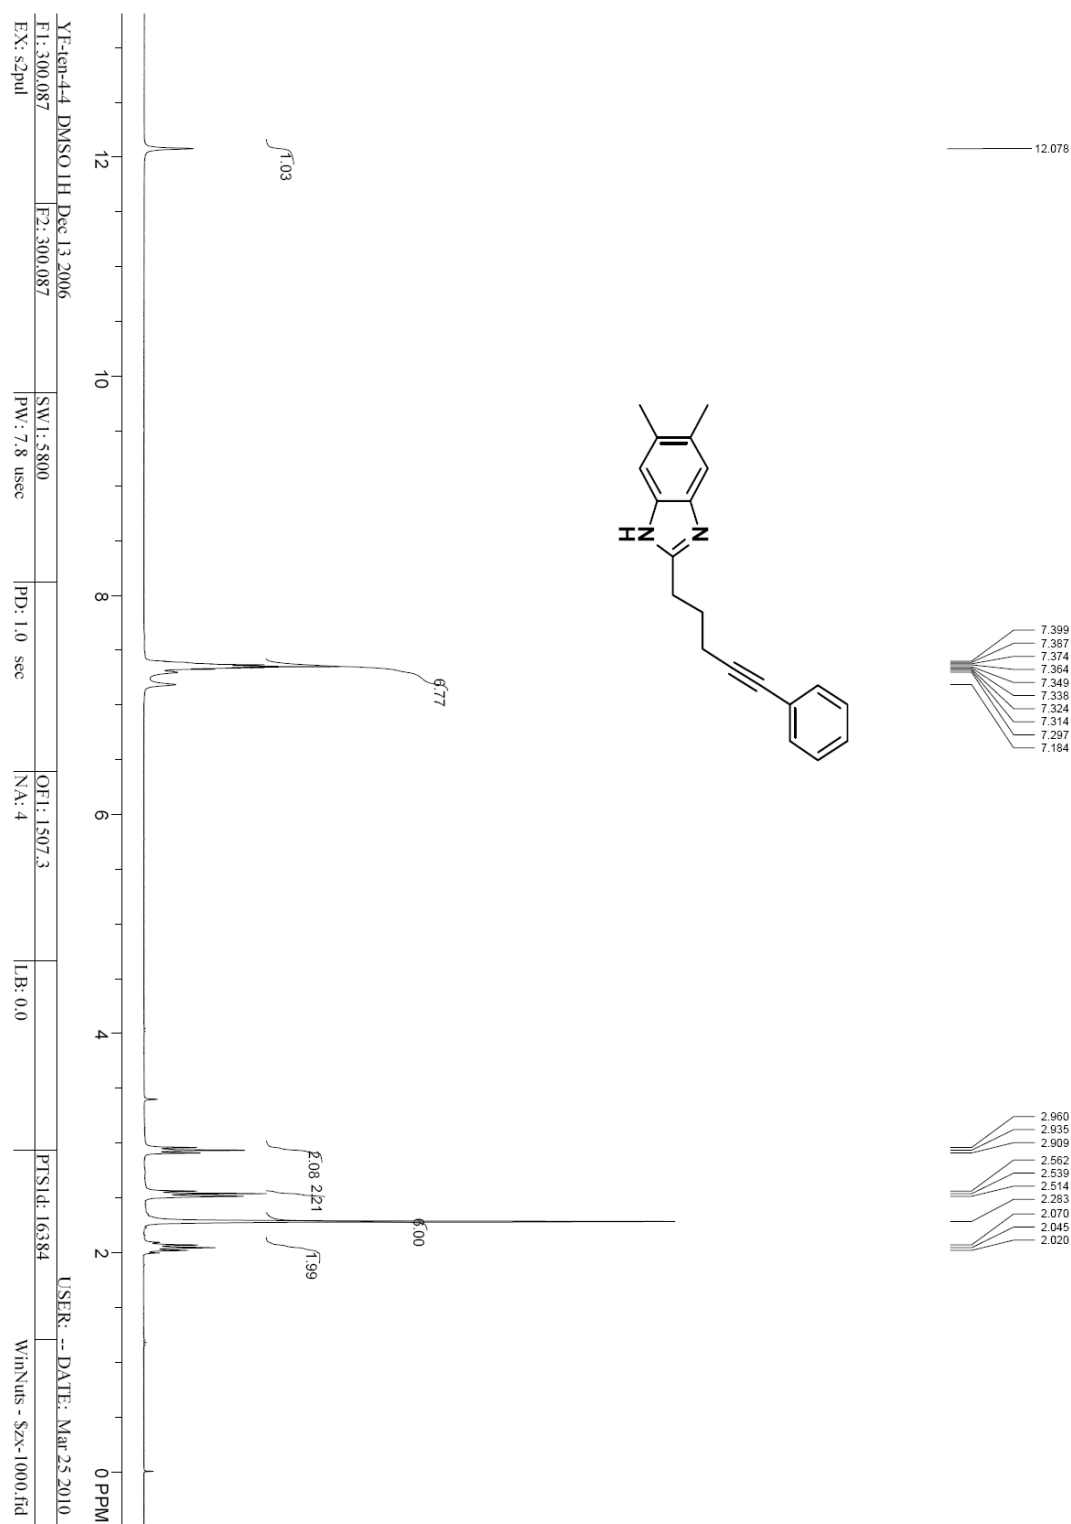

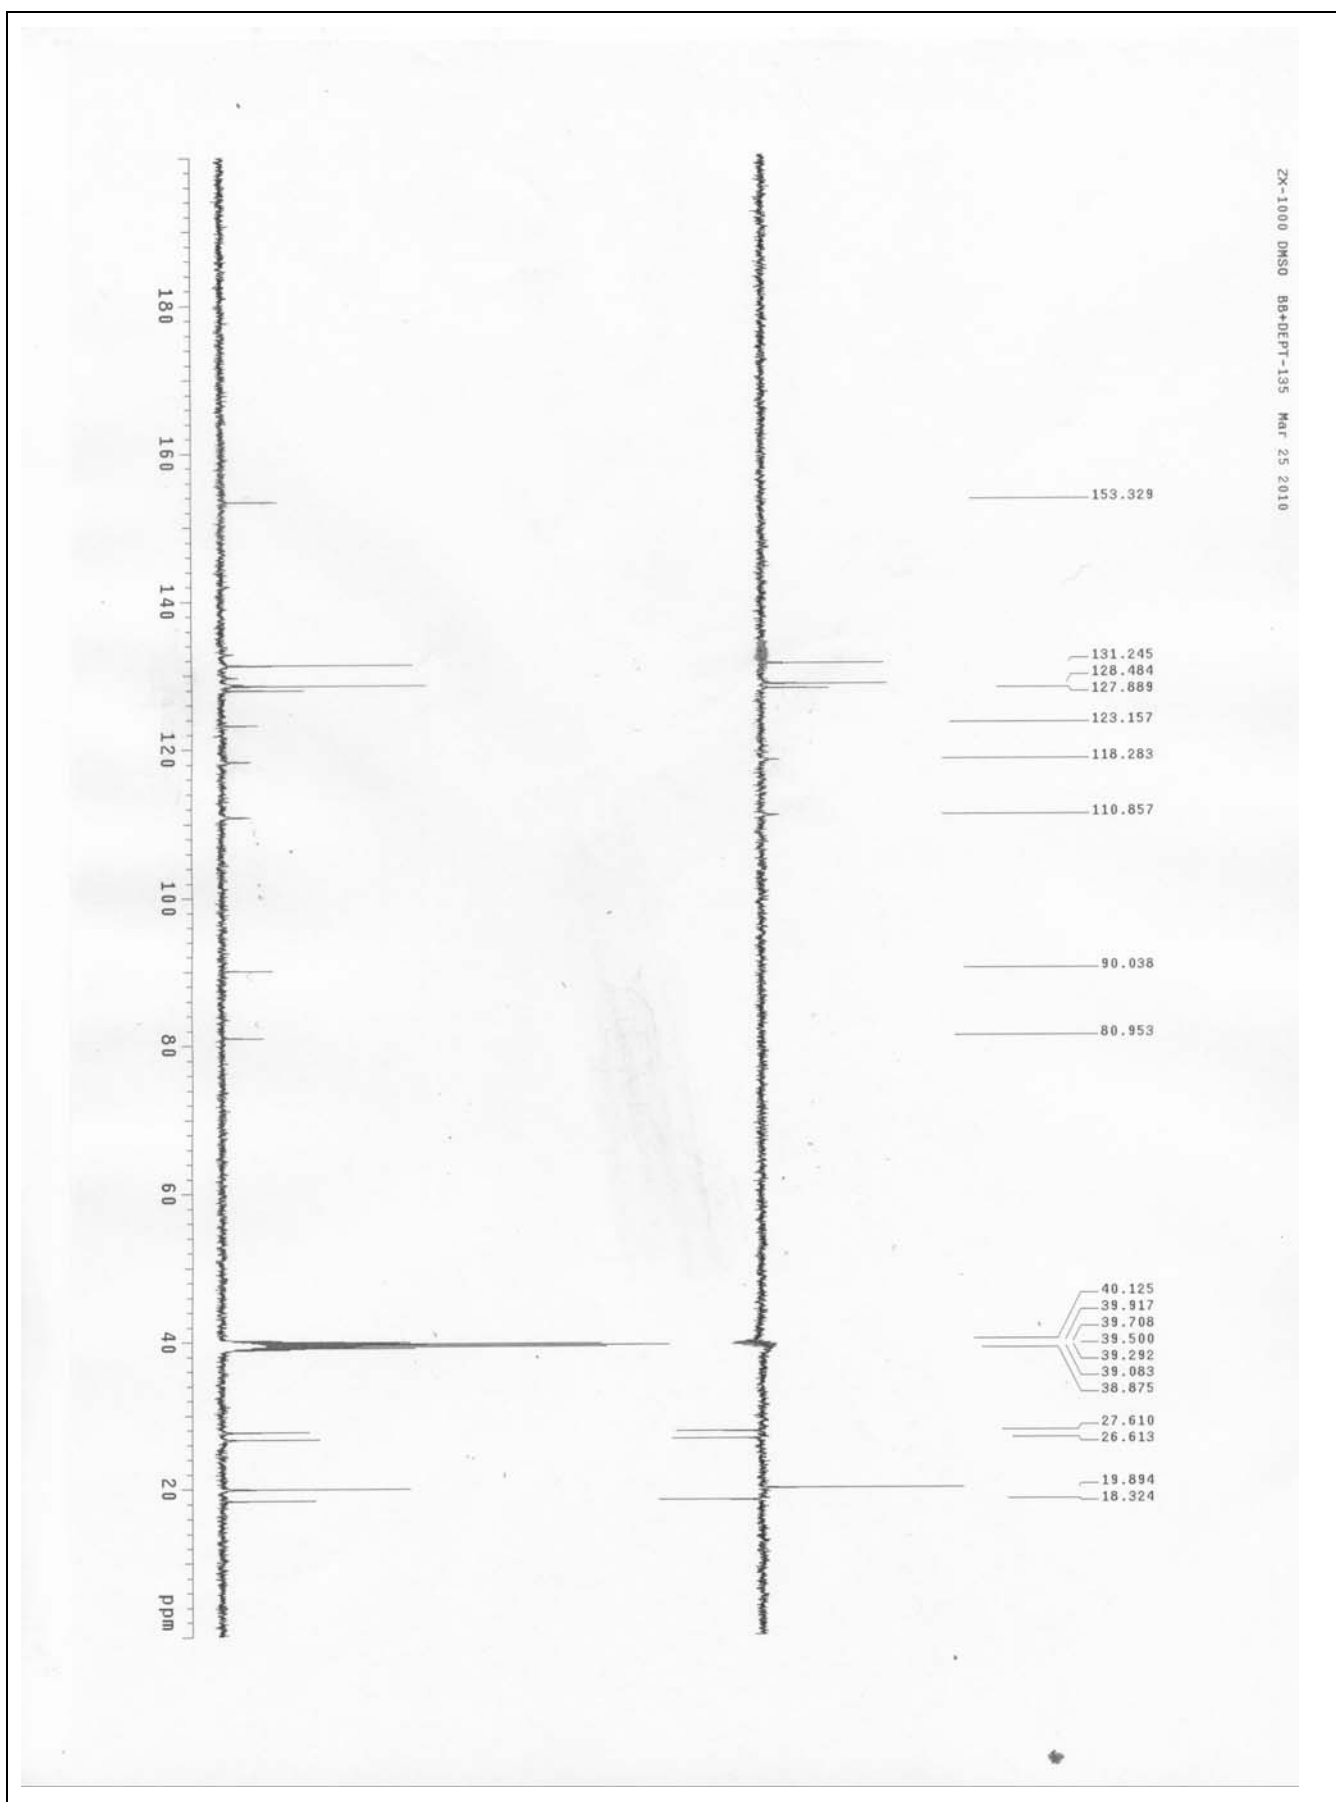

# **5, 6-Dichloro-2-(5-phenylpent-4-ynyl)-1H-benzo[d]imidazole (A6)**

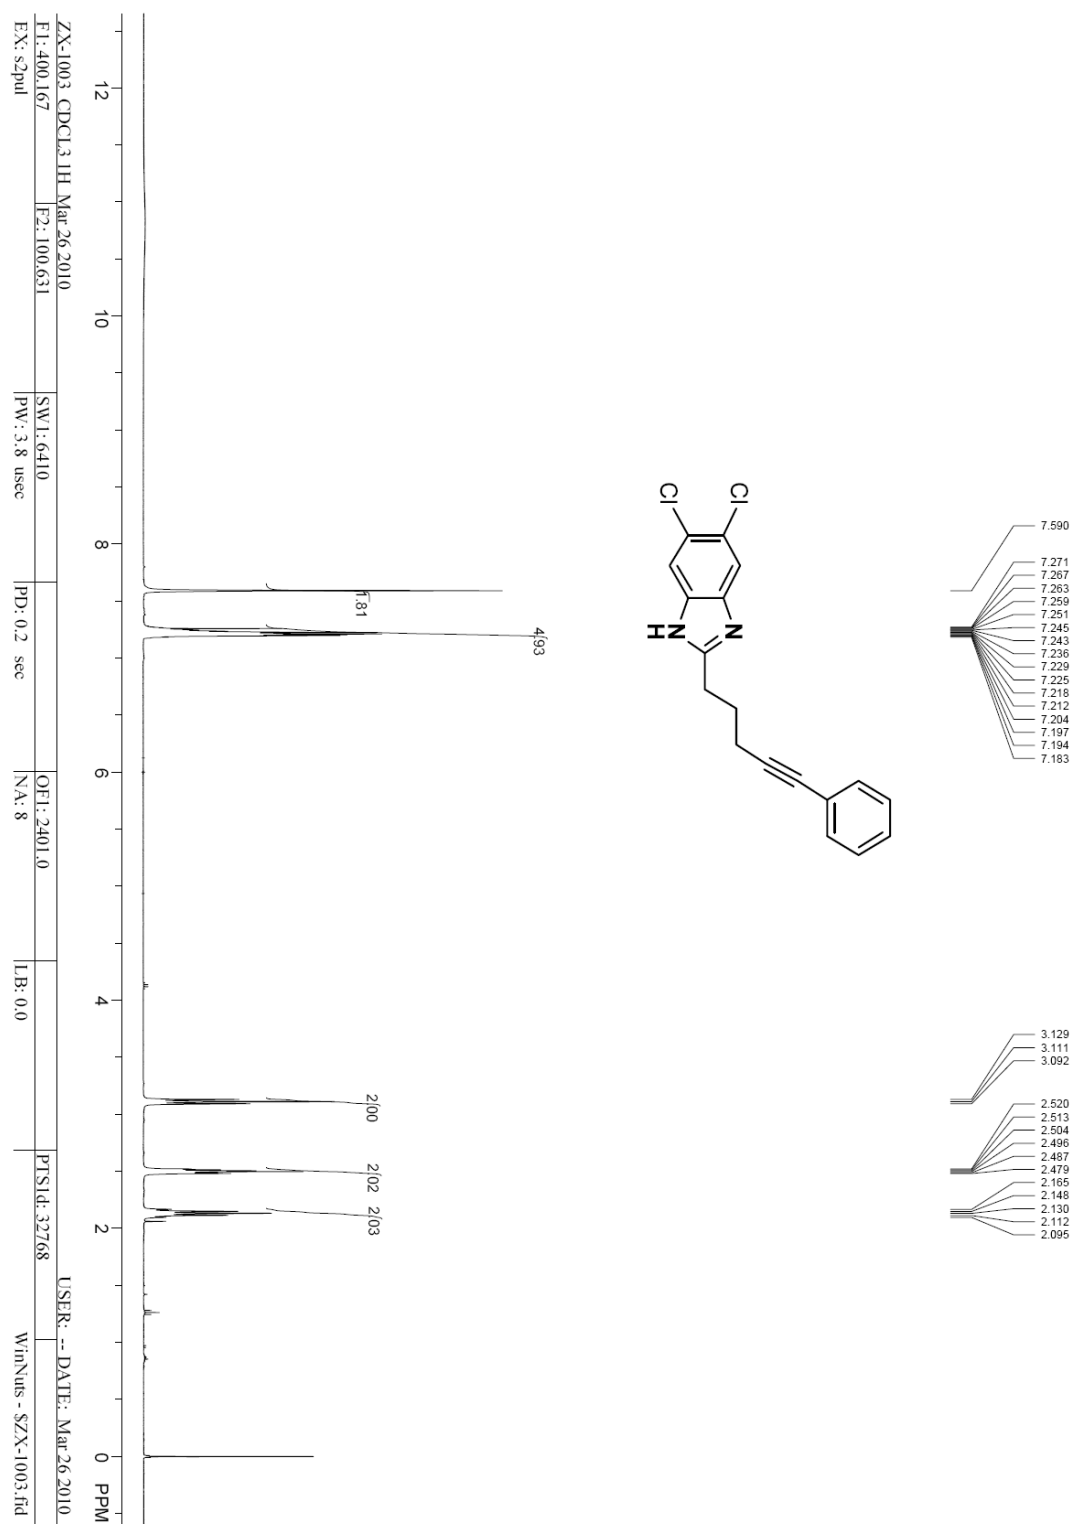

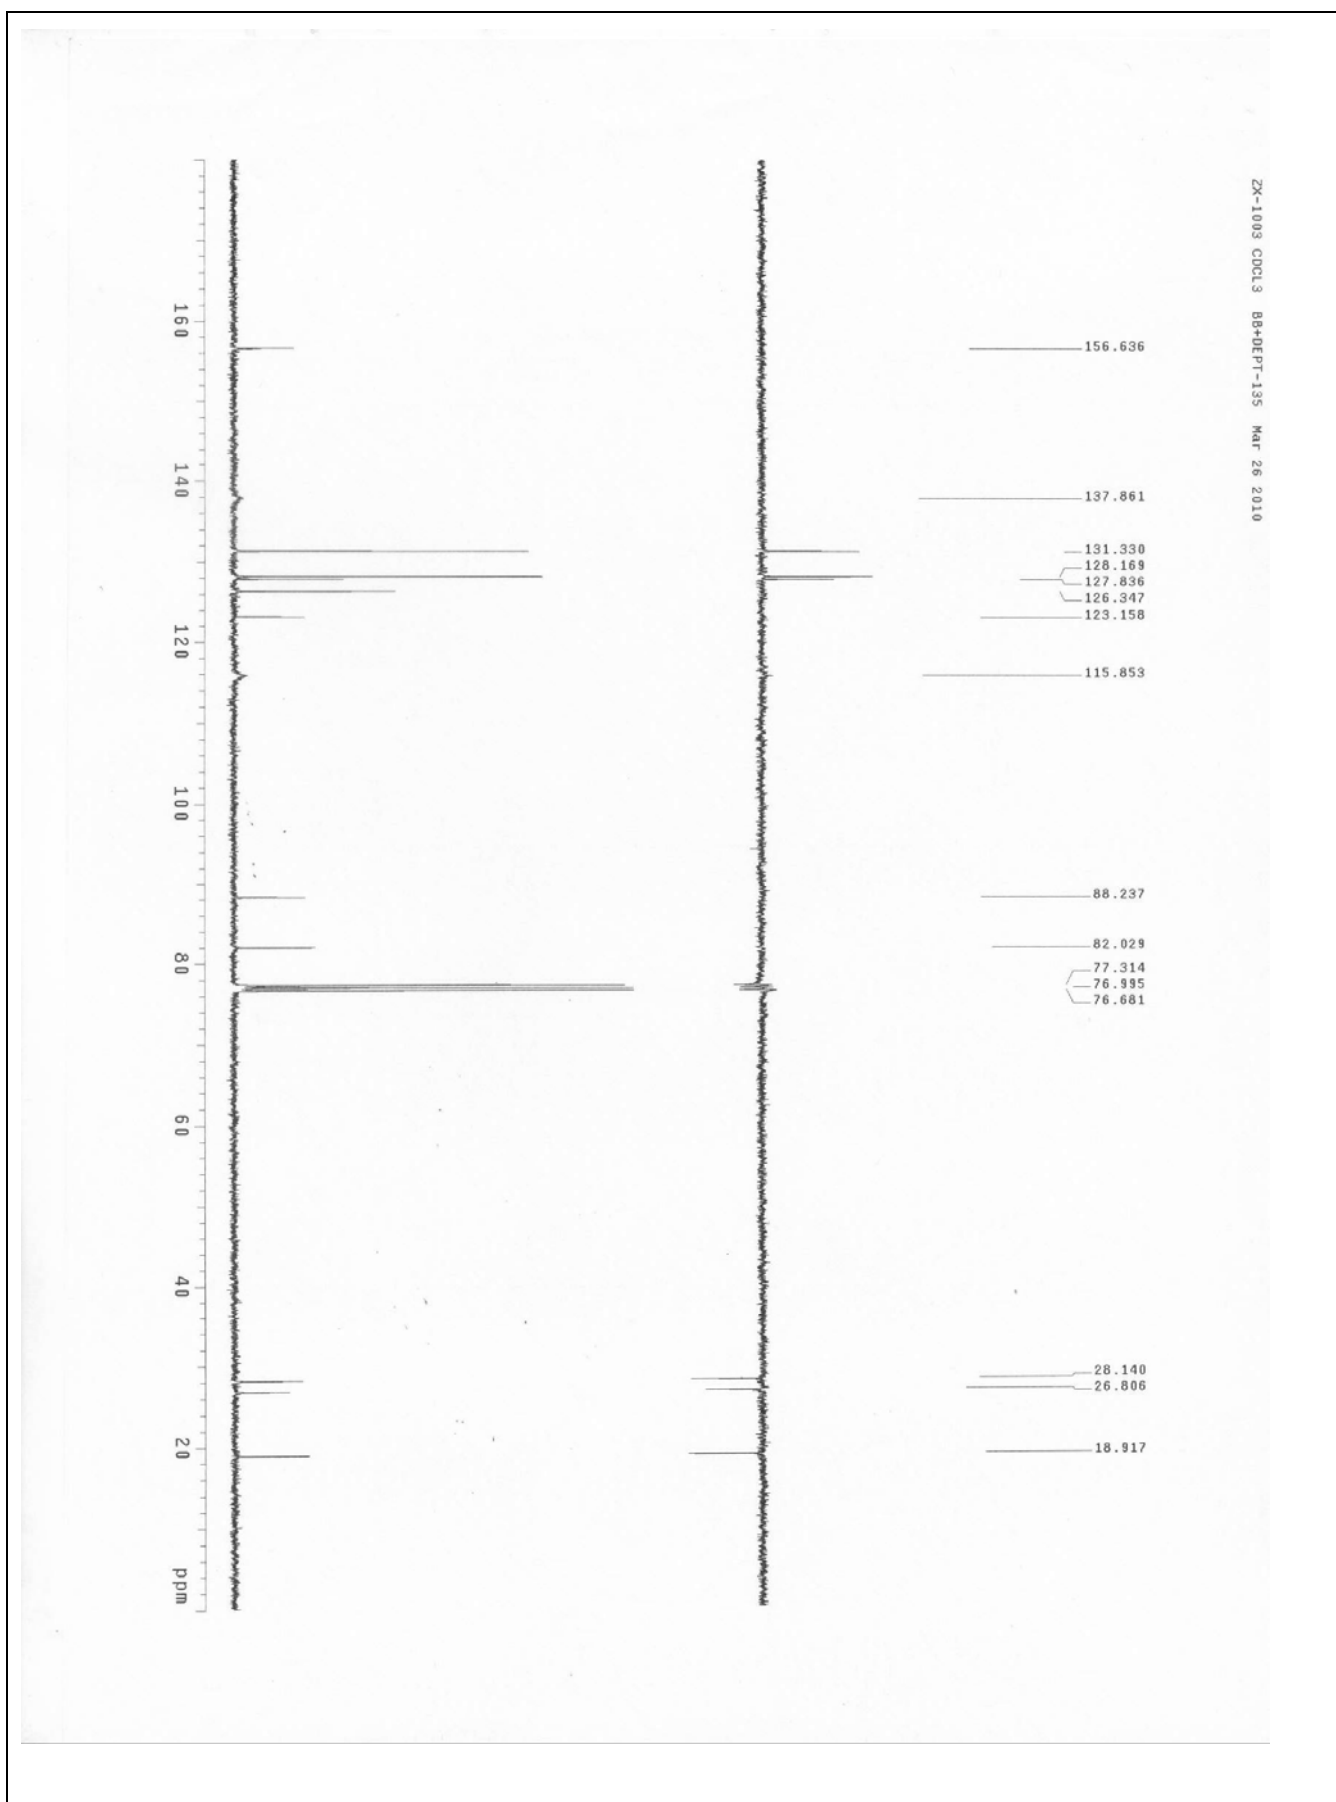

## 2-(5-(4-Methoxyphenyl)pent-4-ynyl)-1H-benzo[d]imidazole (A7)

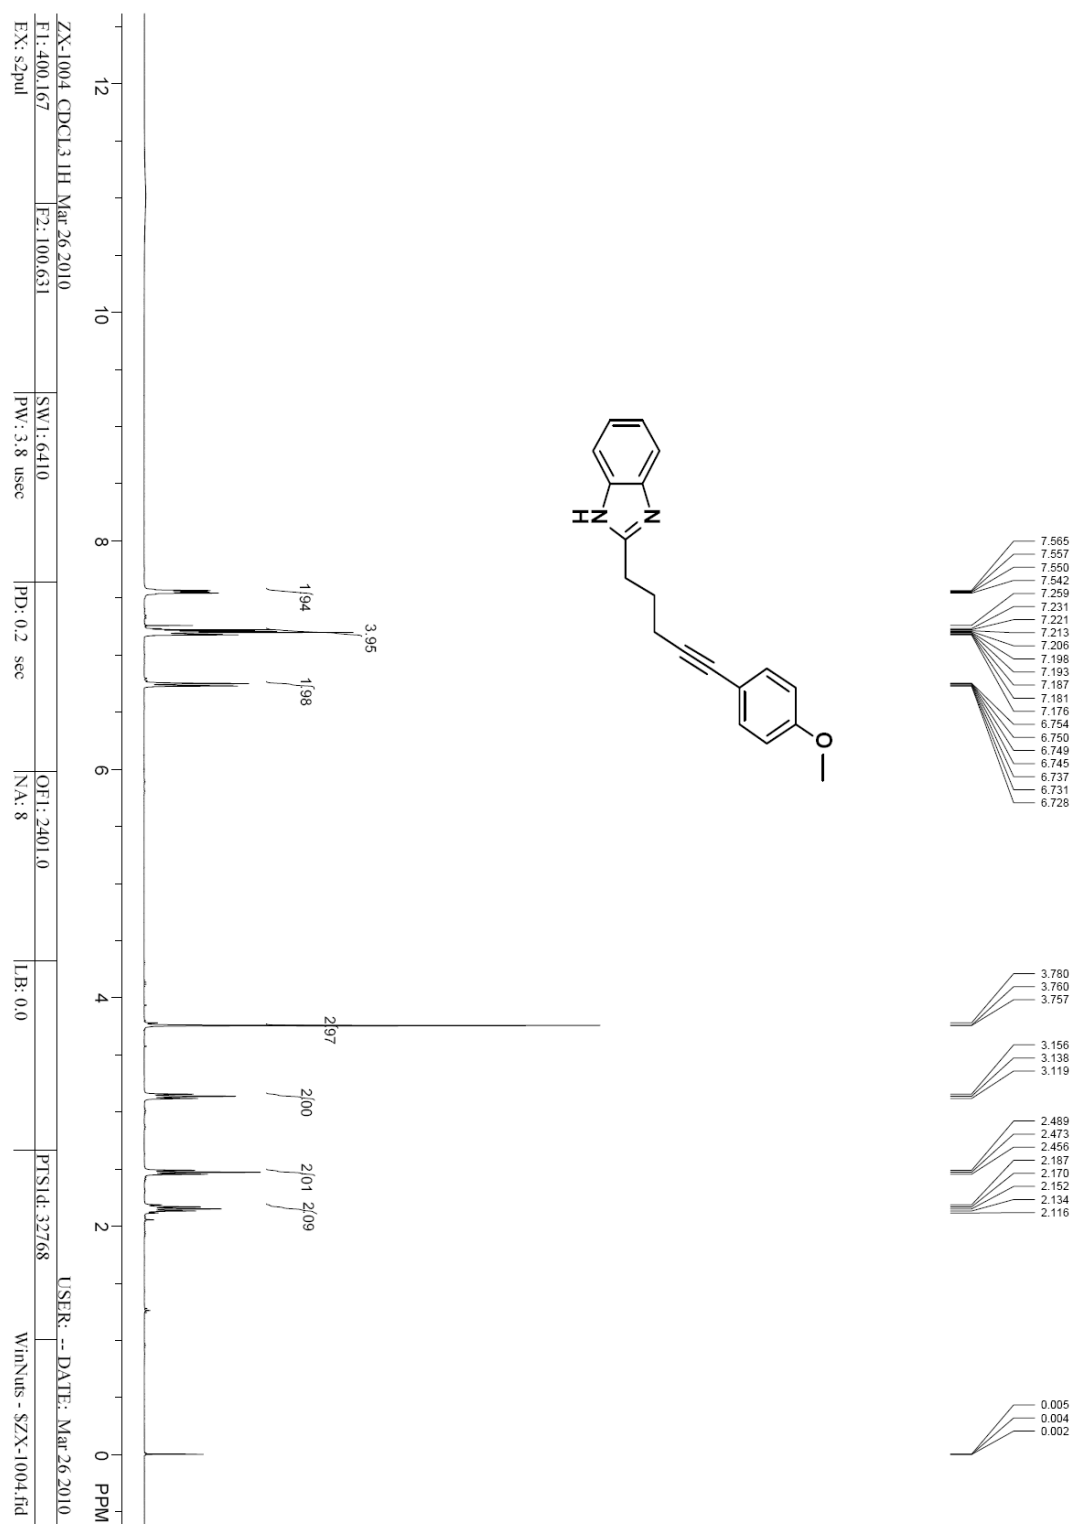

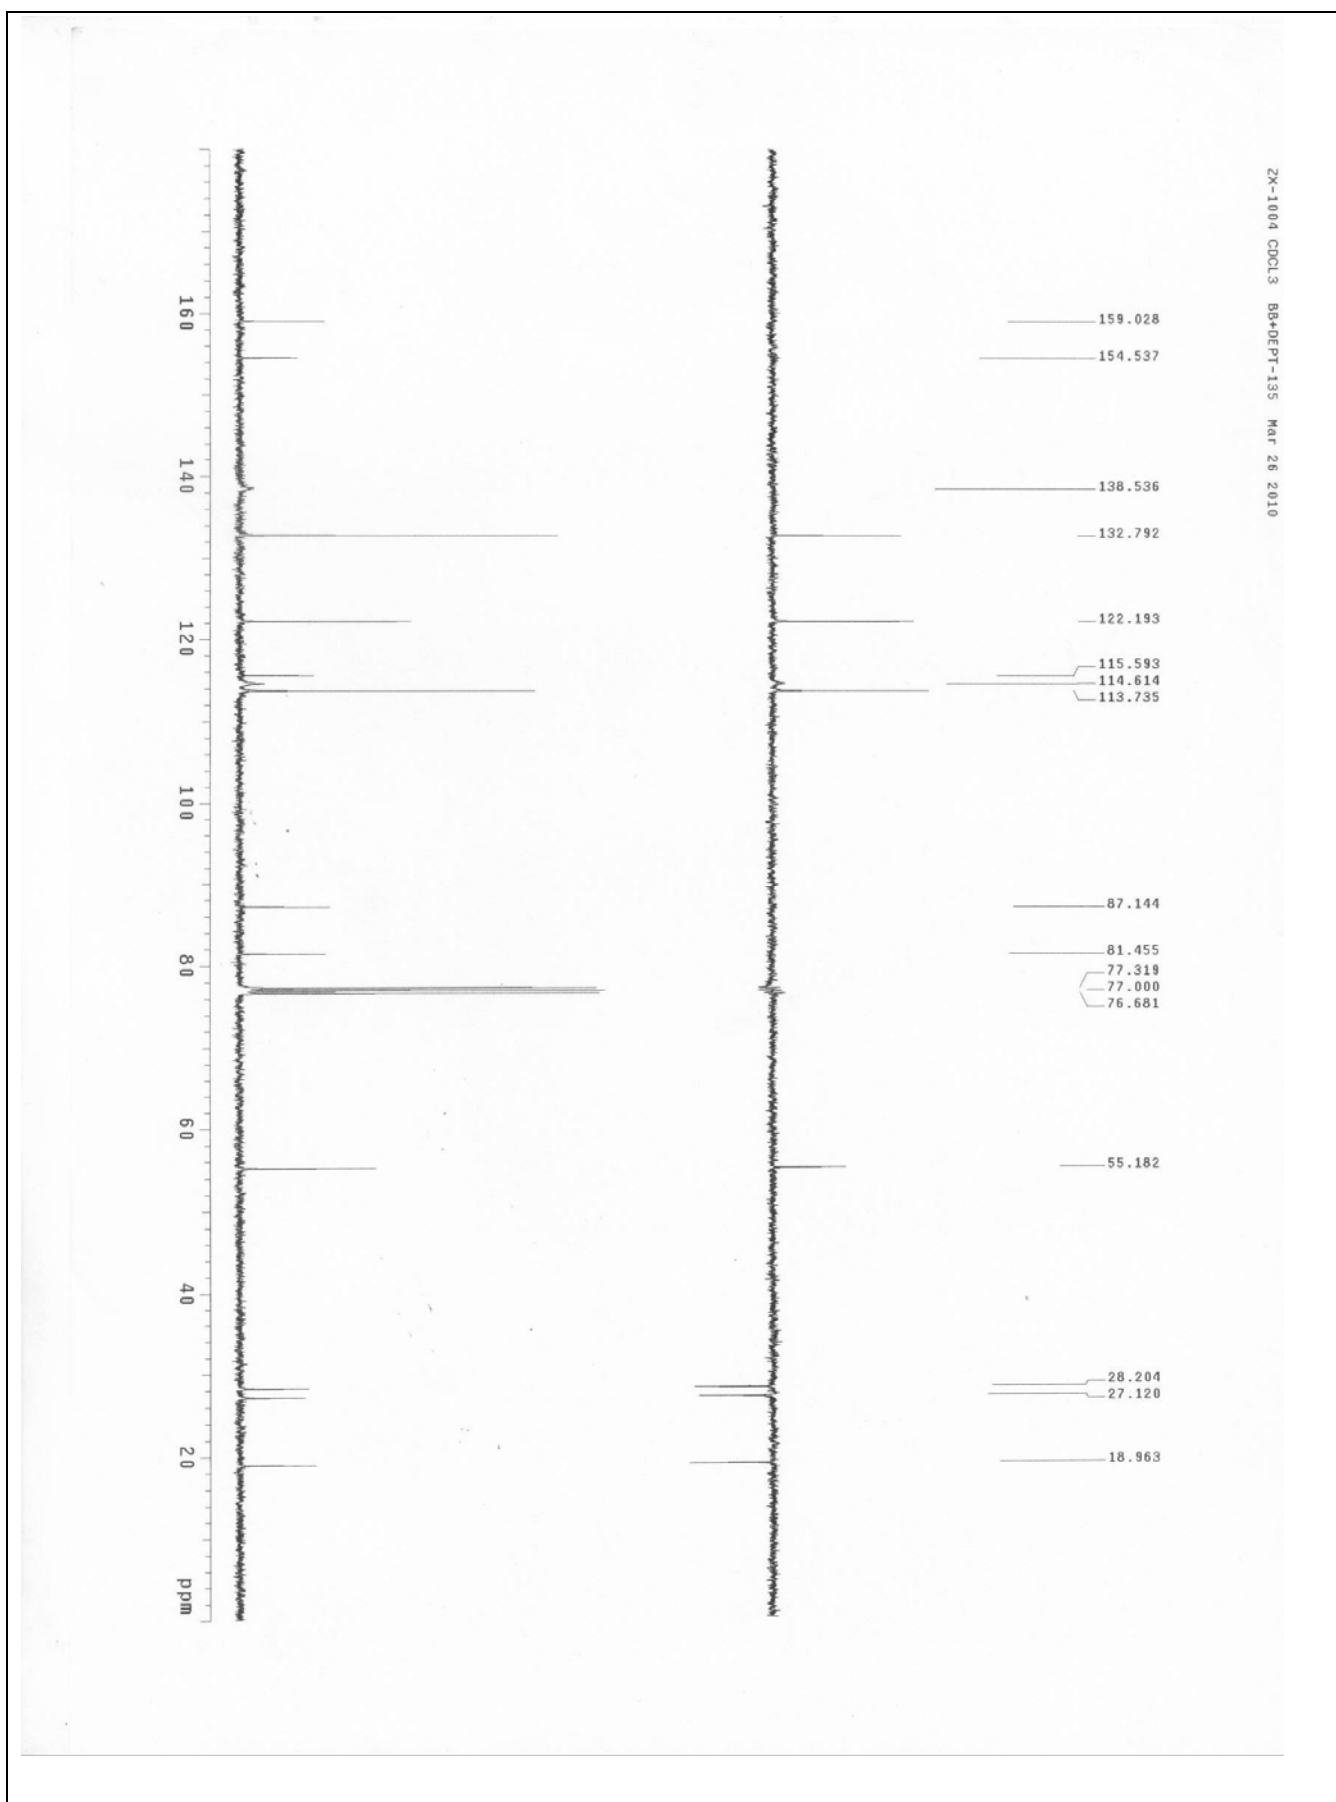

## 2-(5-(2-(Trifluoromethyl)phenyl)pent-4-ynyl)-1H-benzo[d]imidazole (A8)

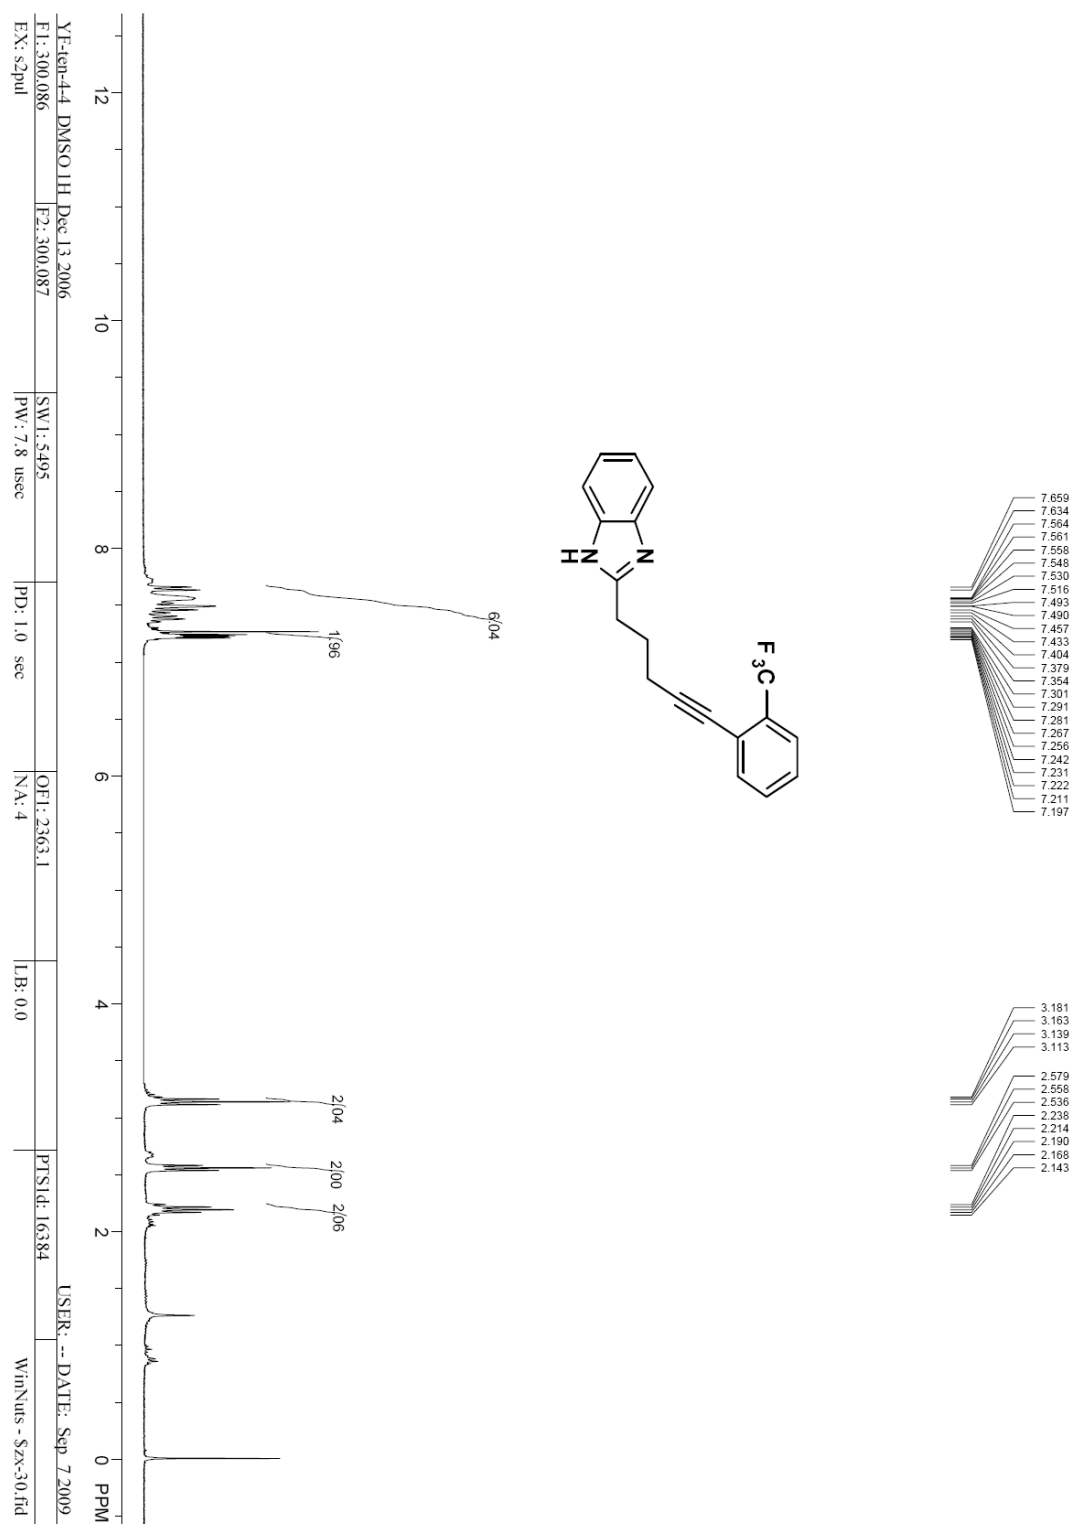

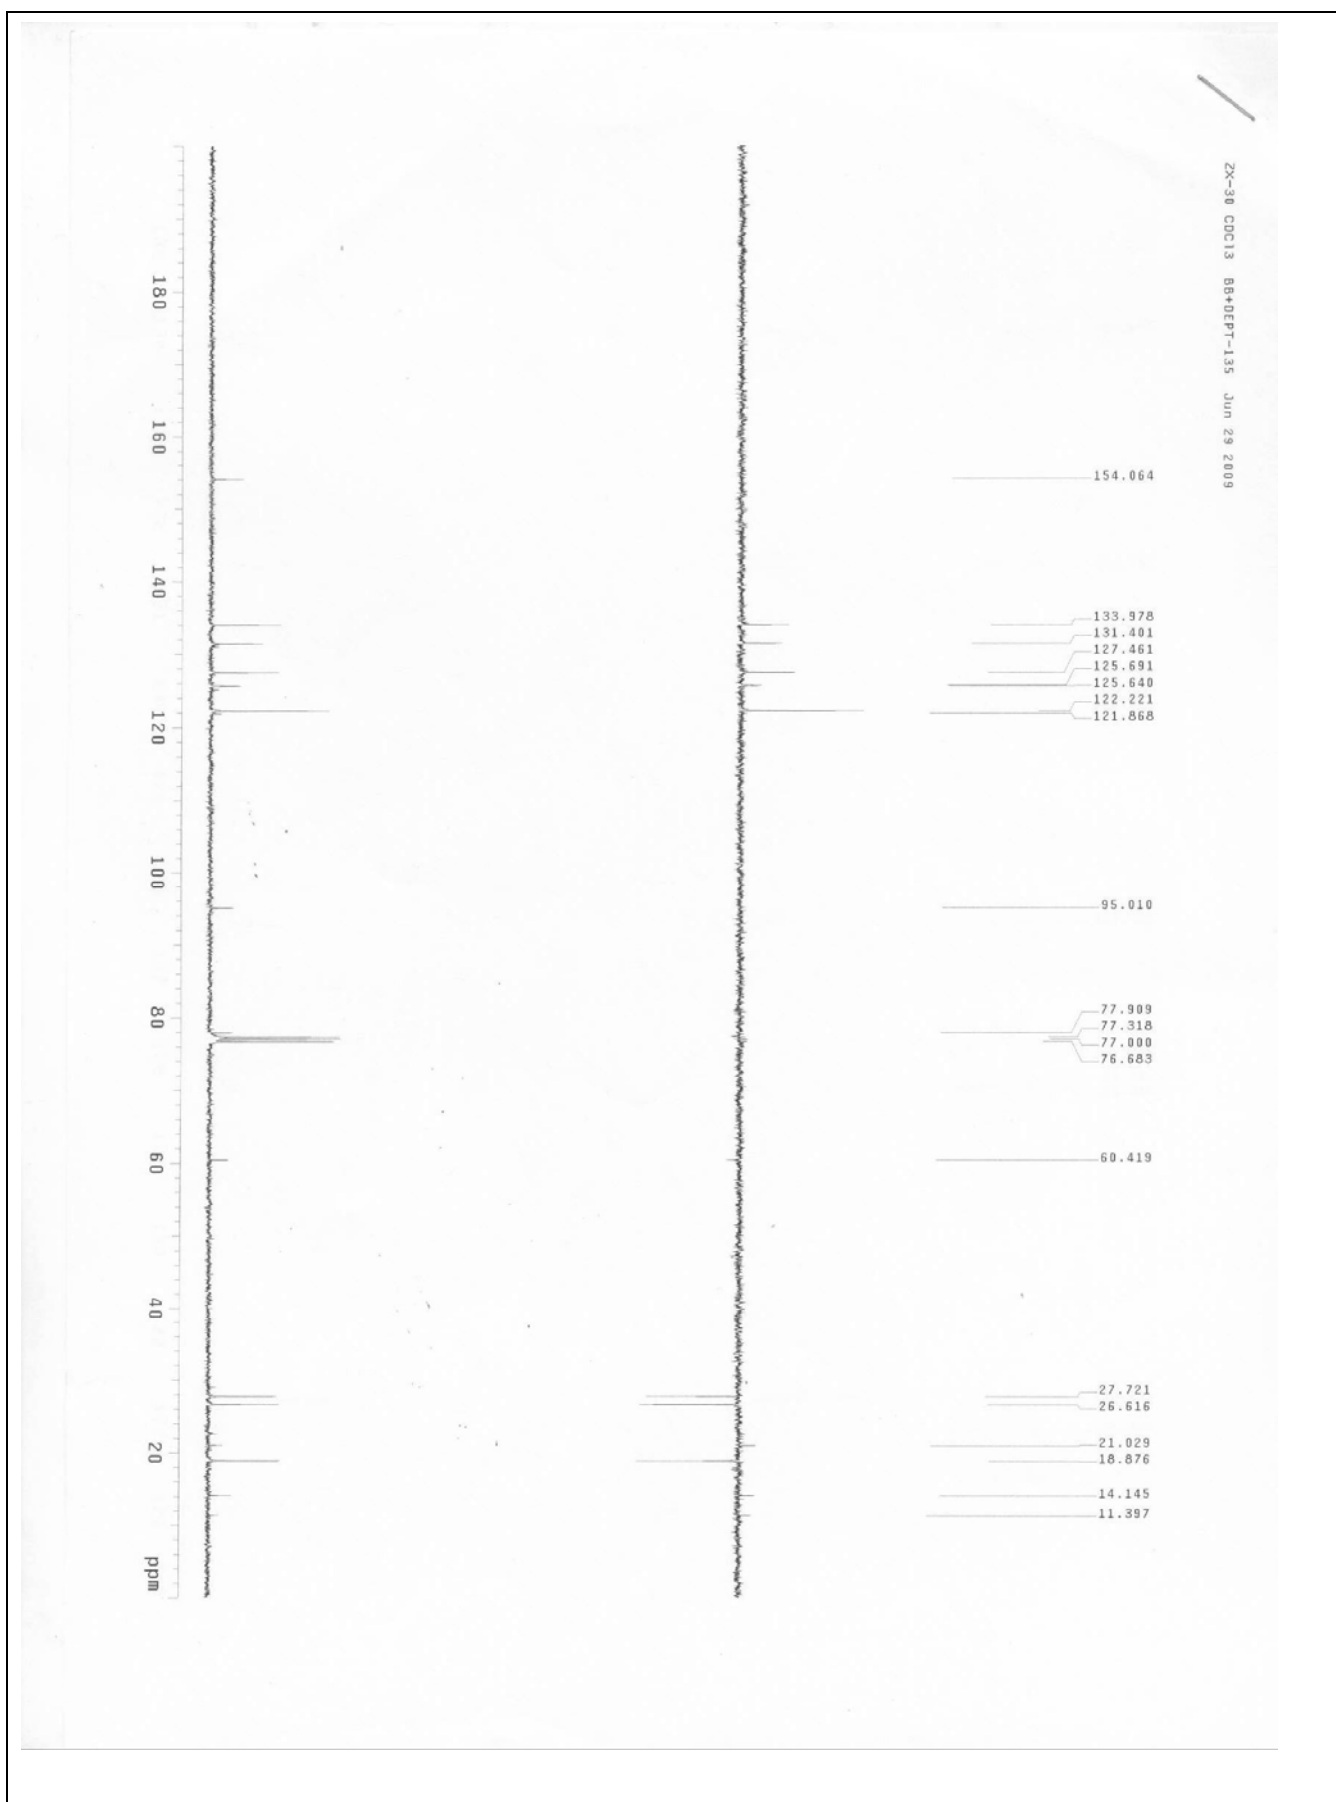



## 2-(5-(3-(Trifluoromethyl)phenyl)pent-4-ynyl)-1H-benzo[d]imidazole (A9)

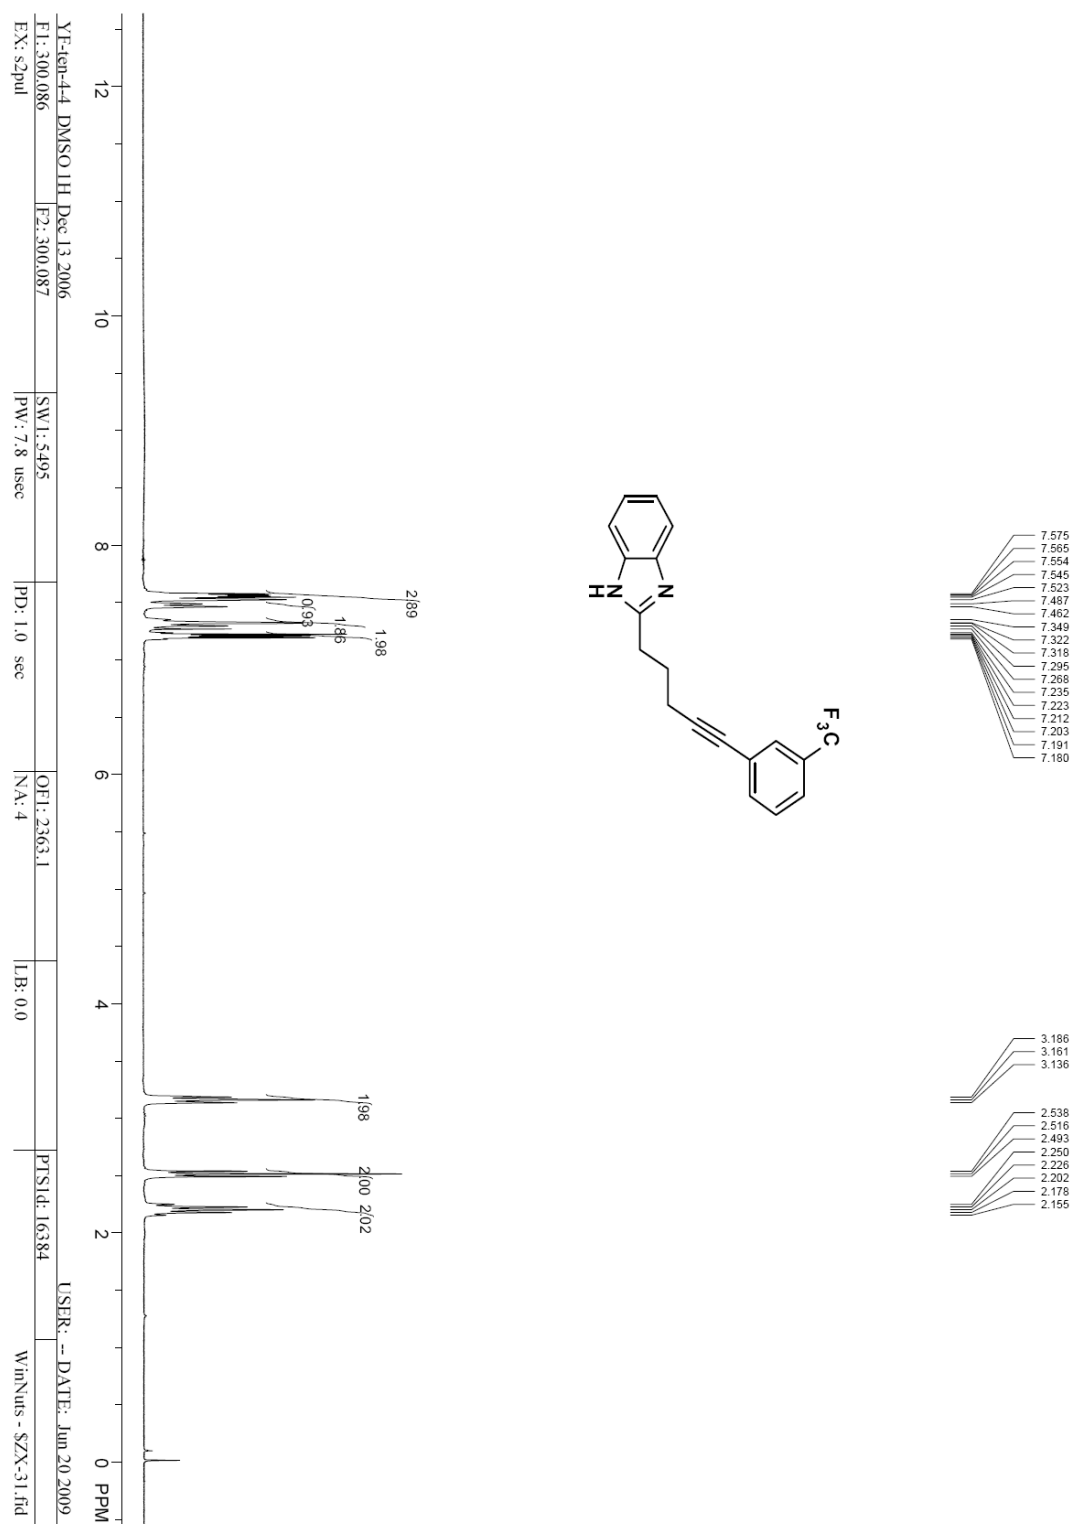

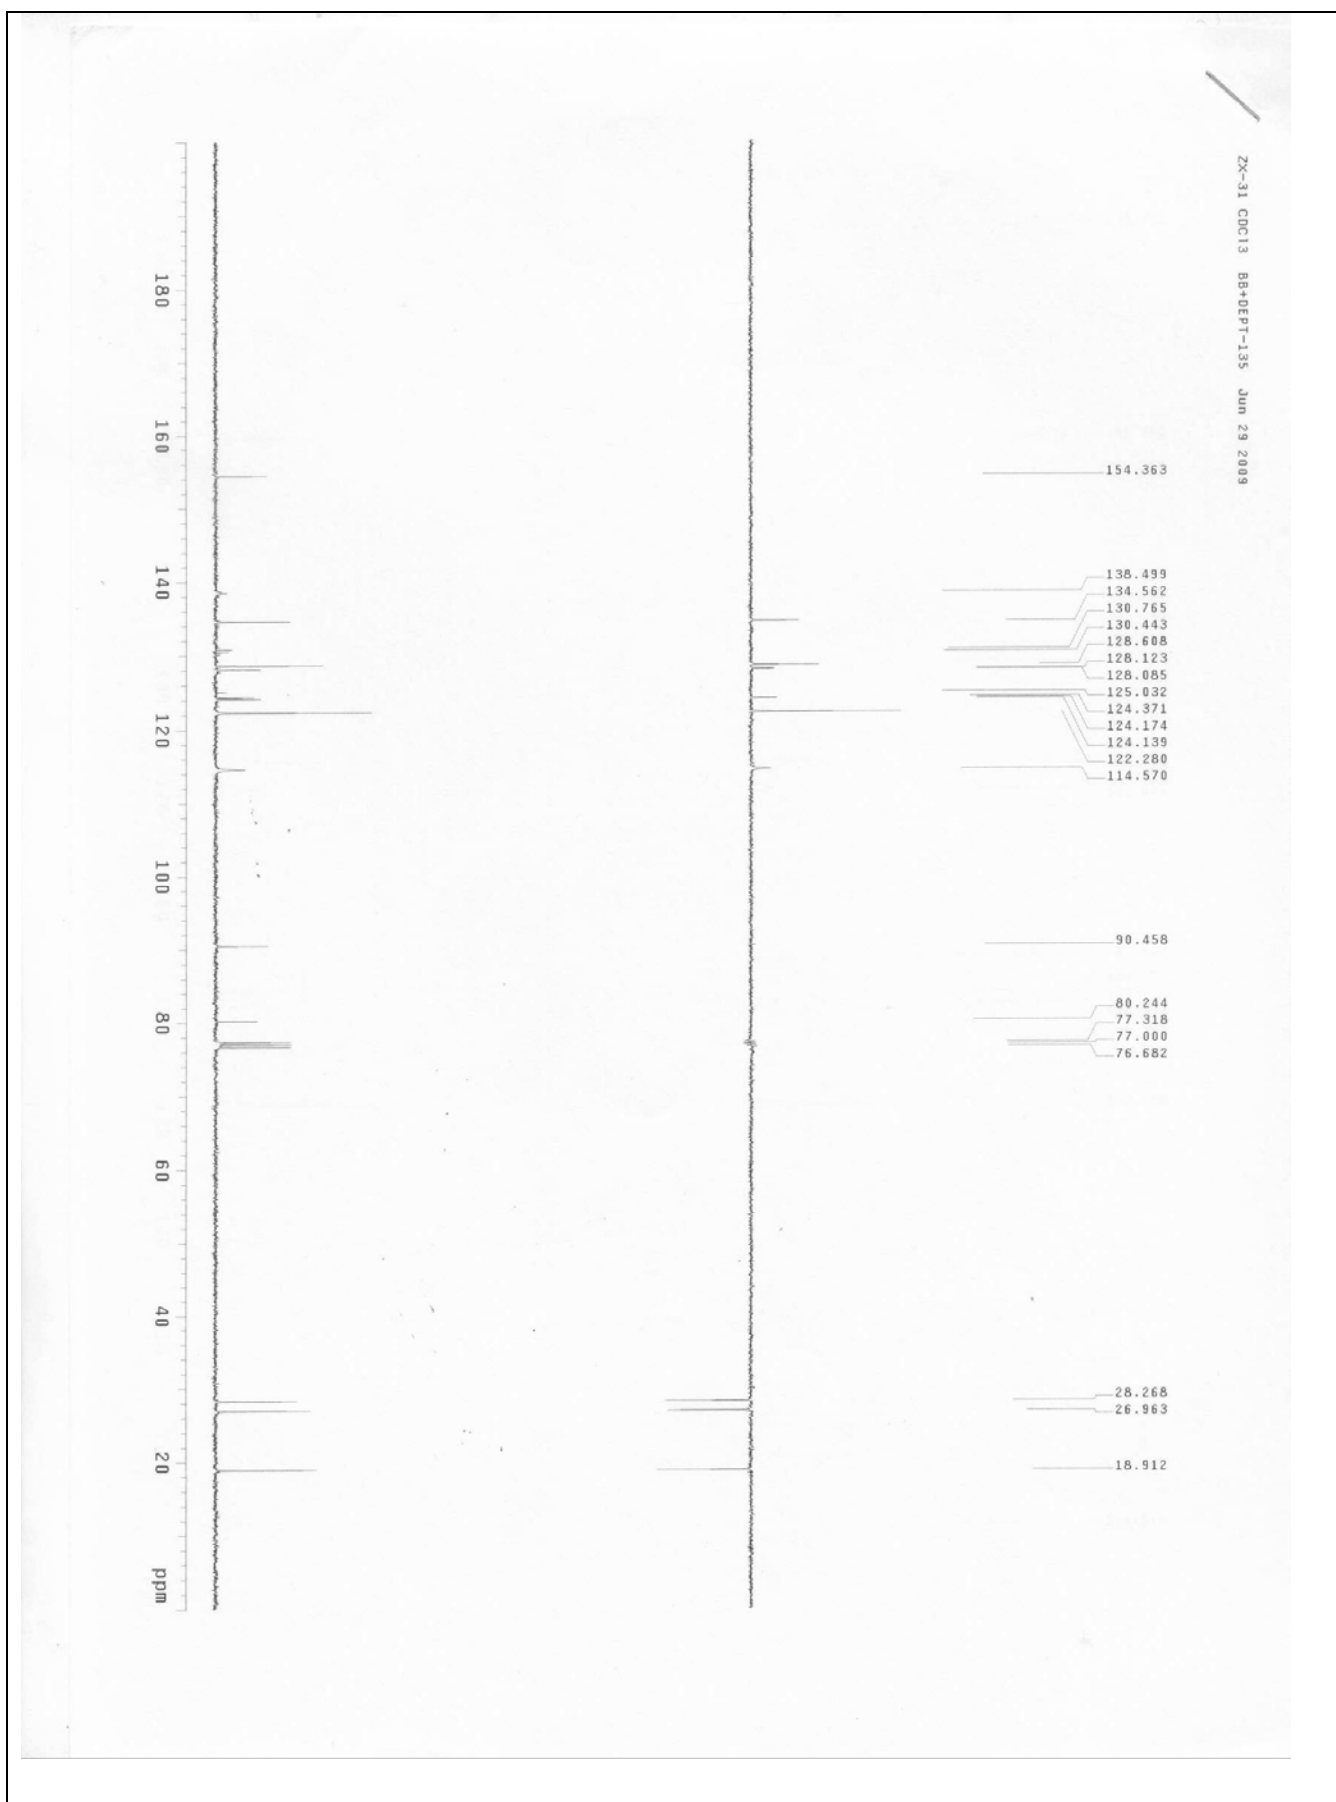

## 2-(5-(4-(Trifluoromethyl)phenyl)pent-4-ynyl)-1H-benzo[d]imidazole (A10)

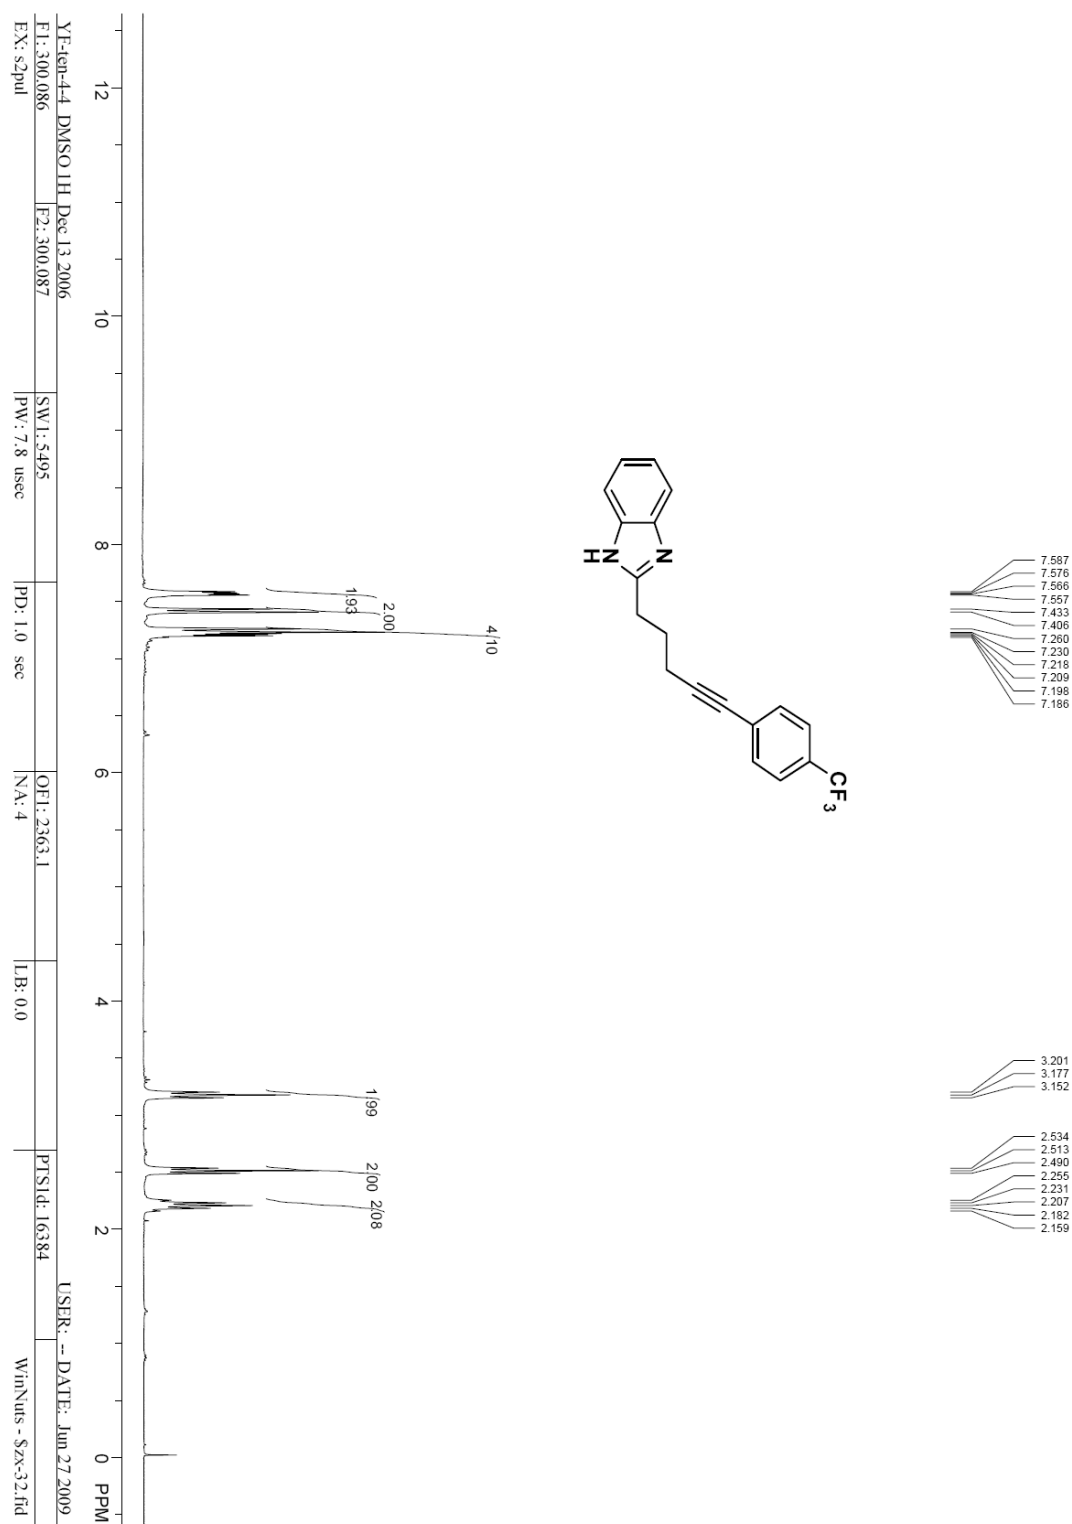

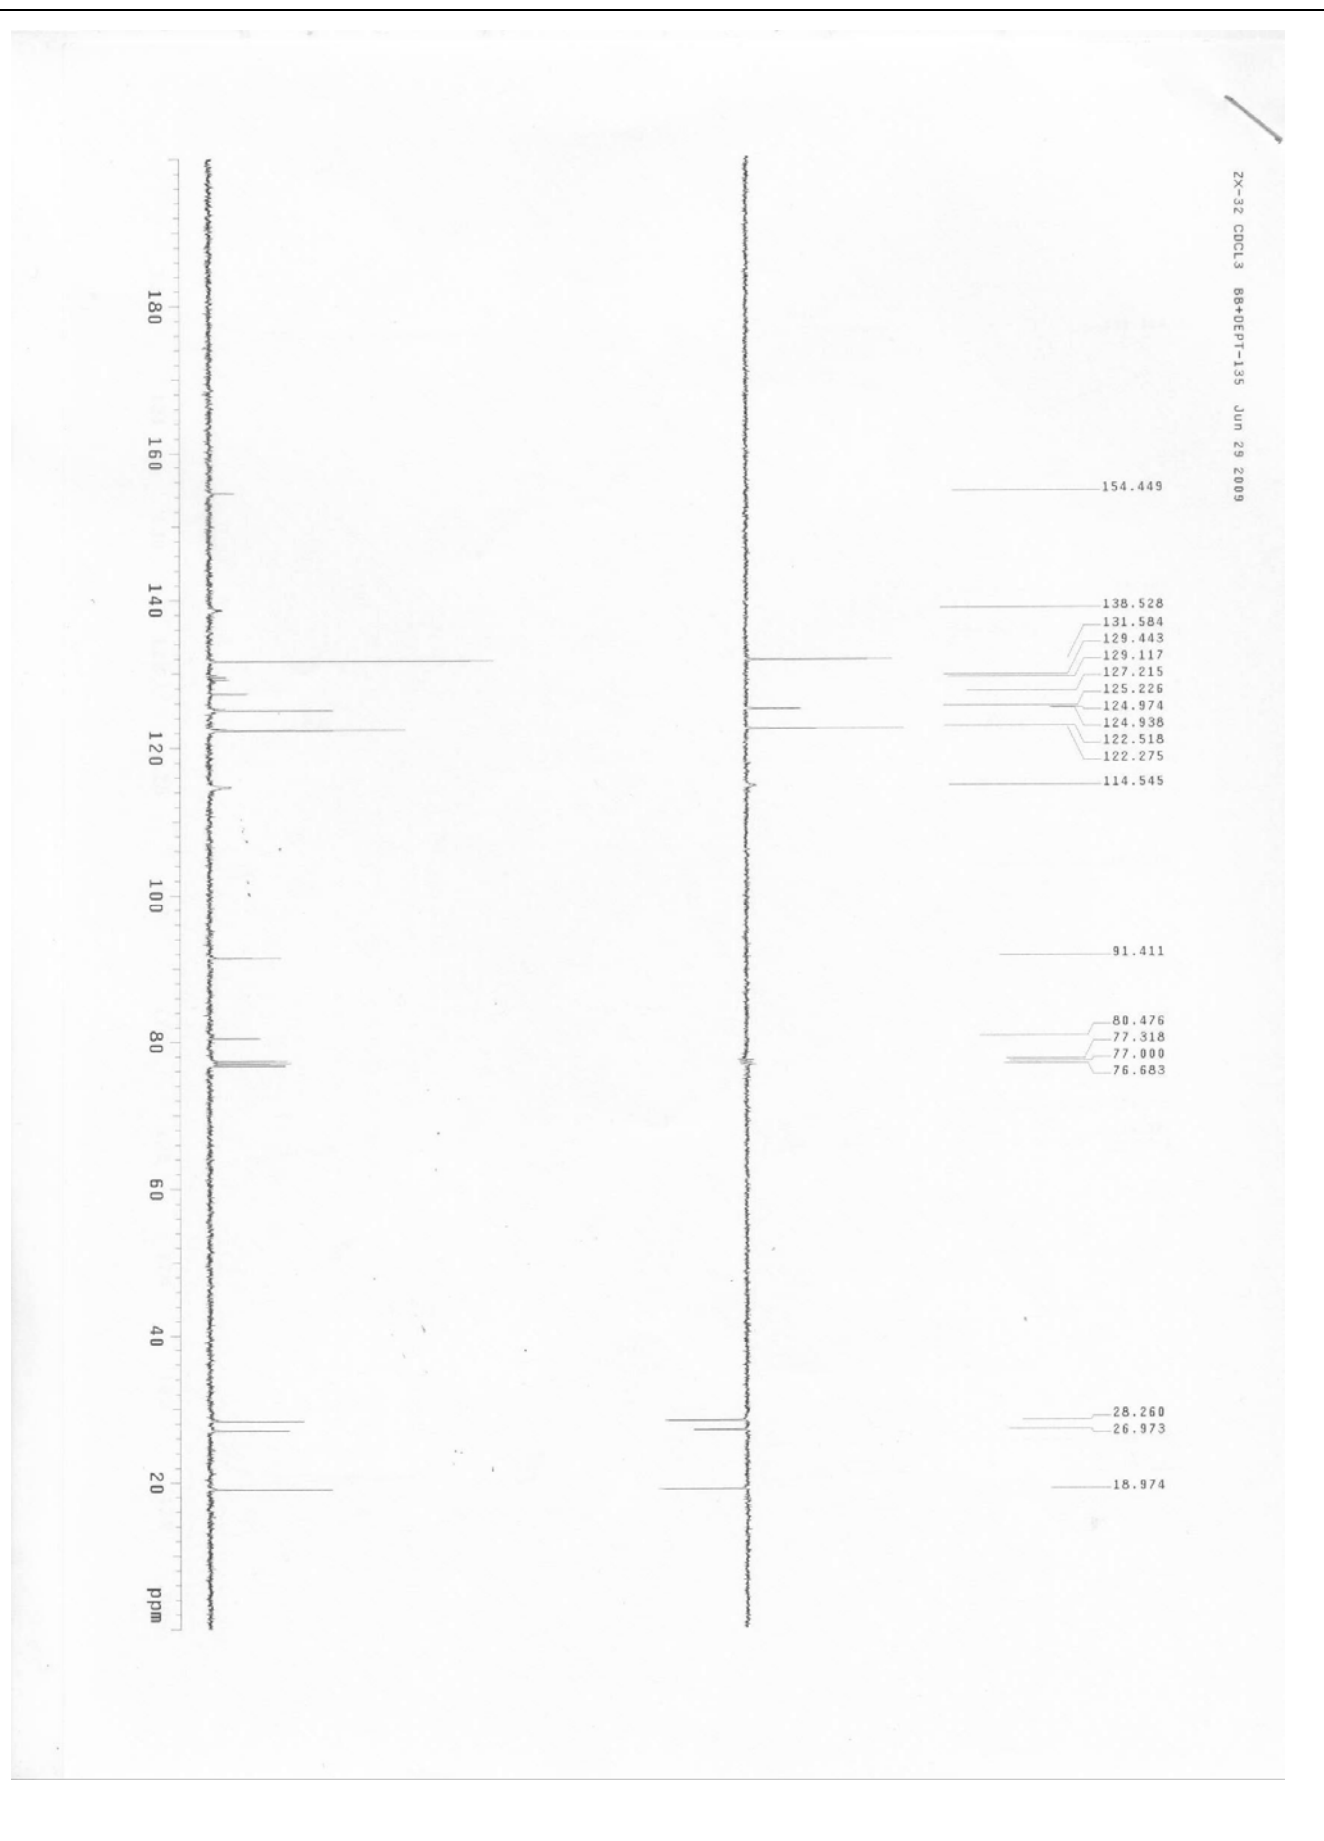

# 2-(5-(4-Chlorophenyl)pent-4-ynyl)-1H-benzo[d]imidazole (A11)

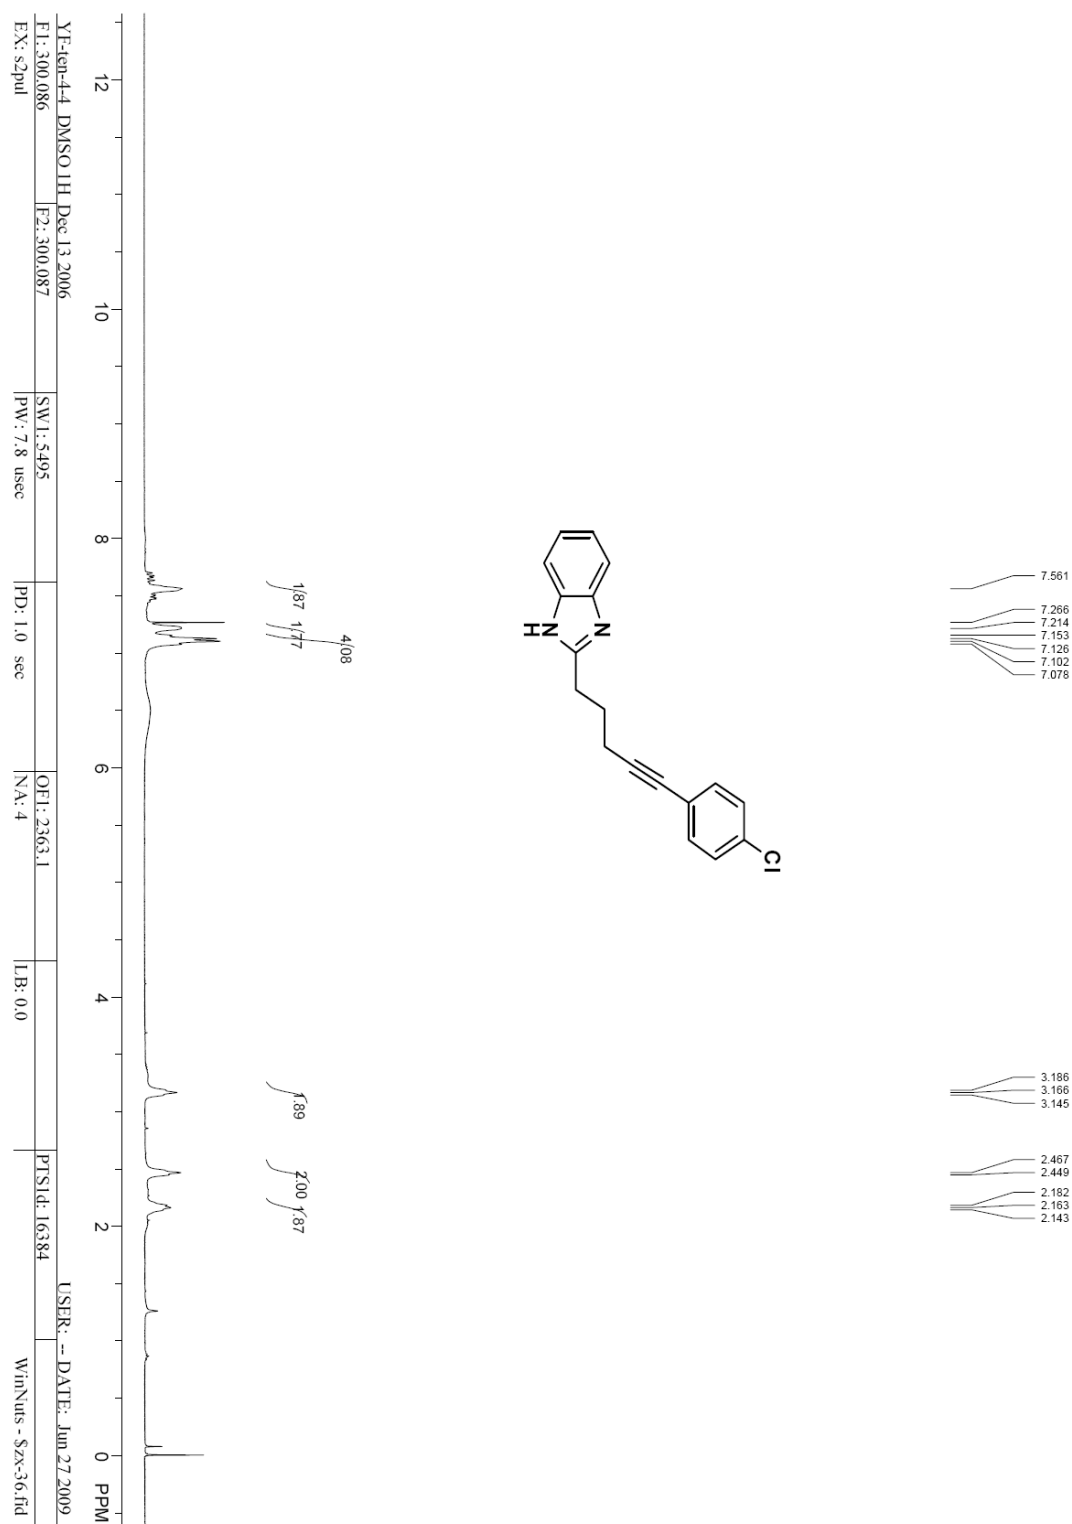

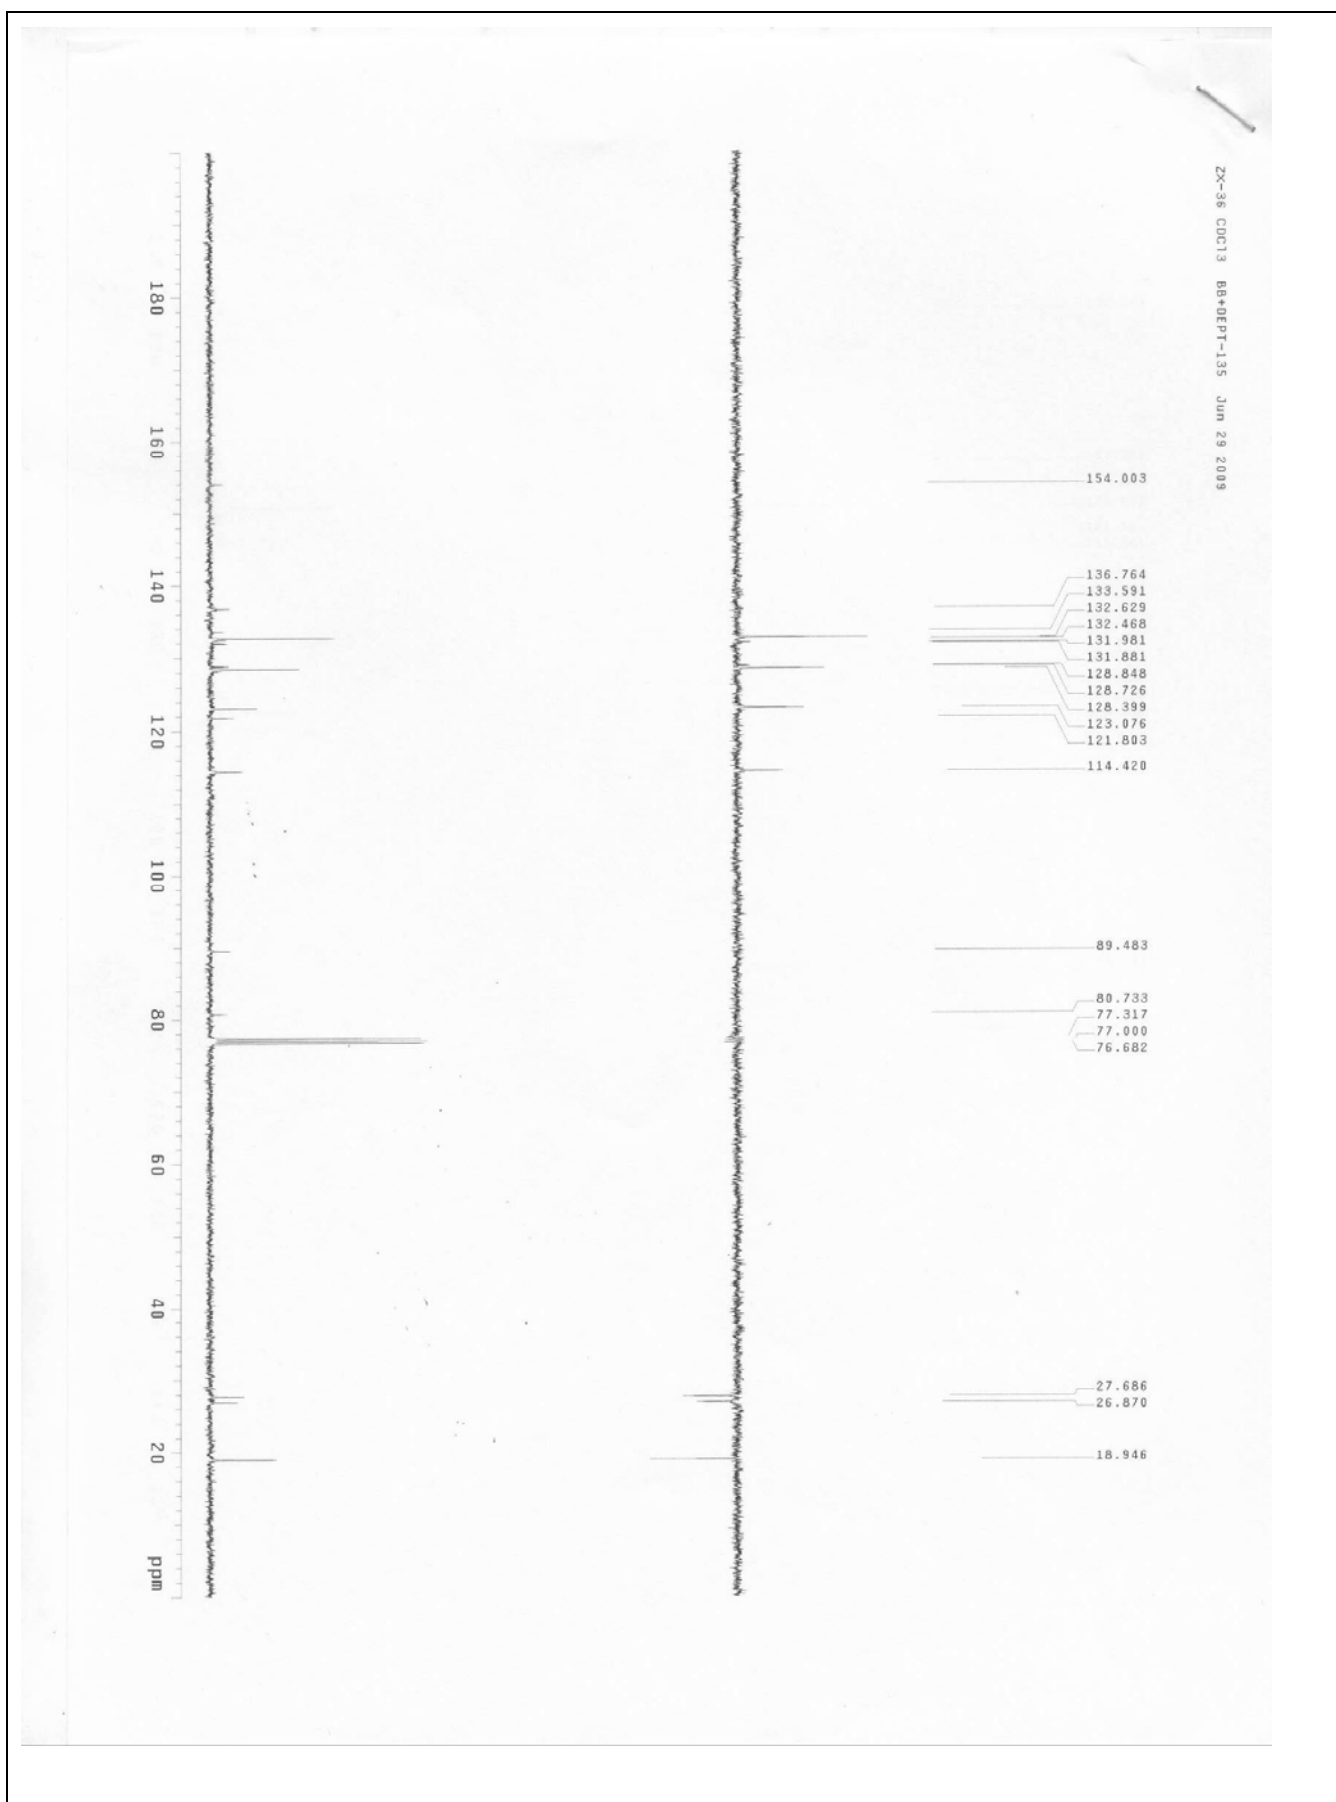

## 2-(5-(Pyridin-3-yl)pent-4-ynyl)-1H-benzo[d]imidazole (A12)

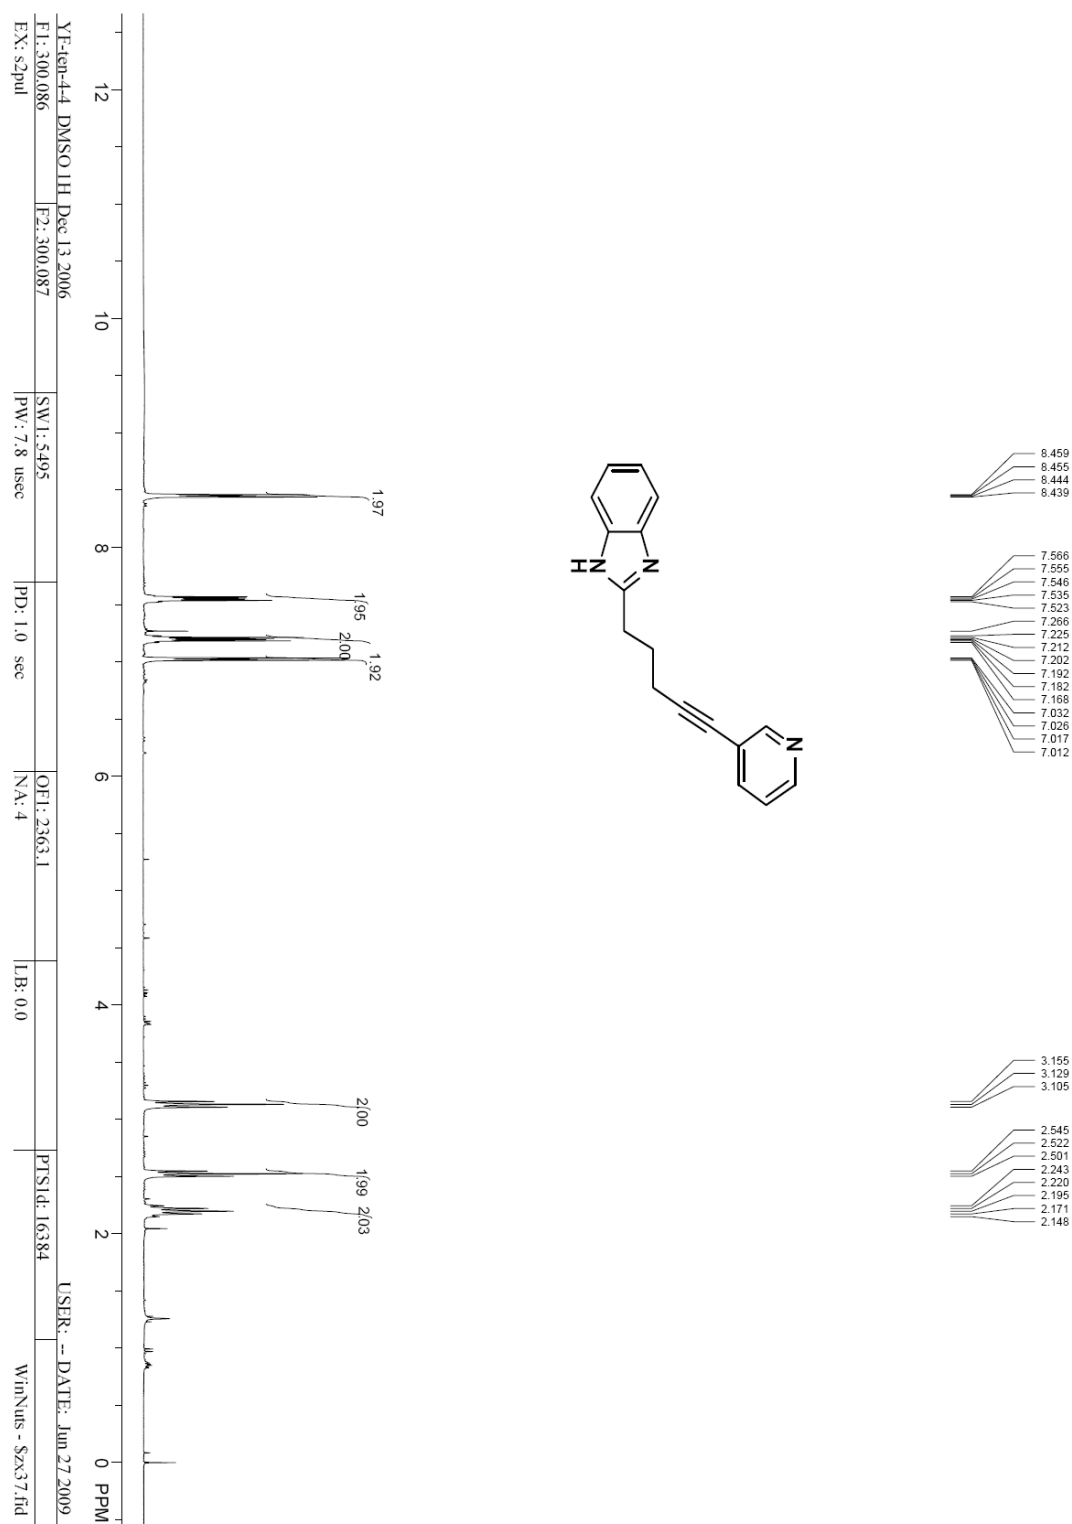

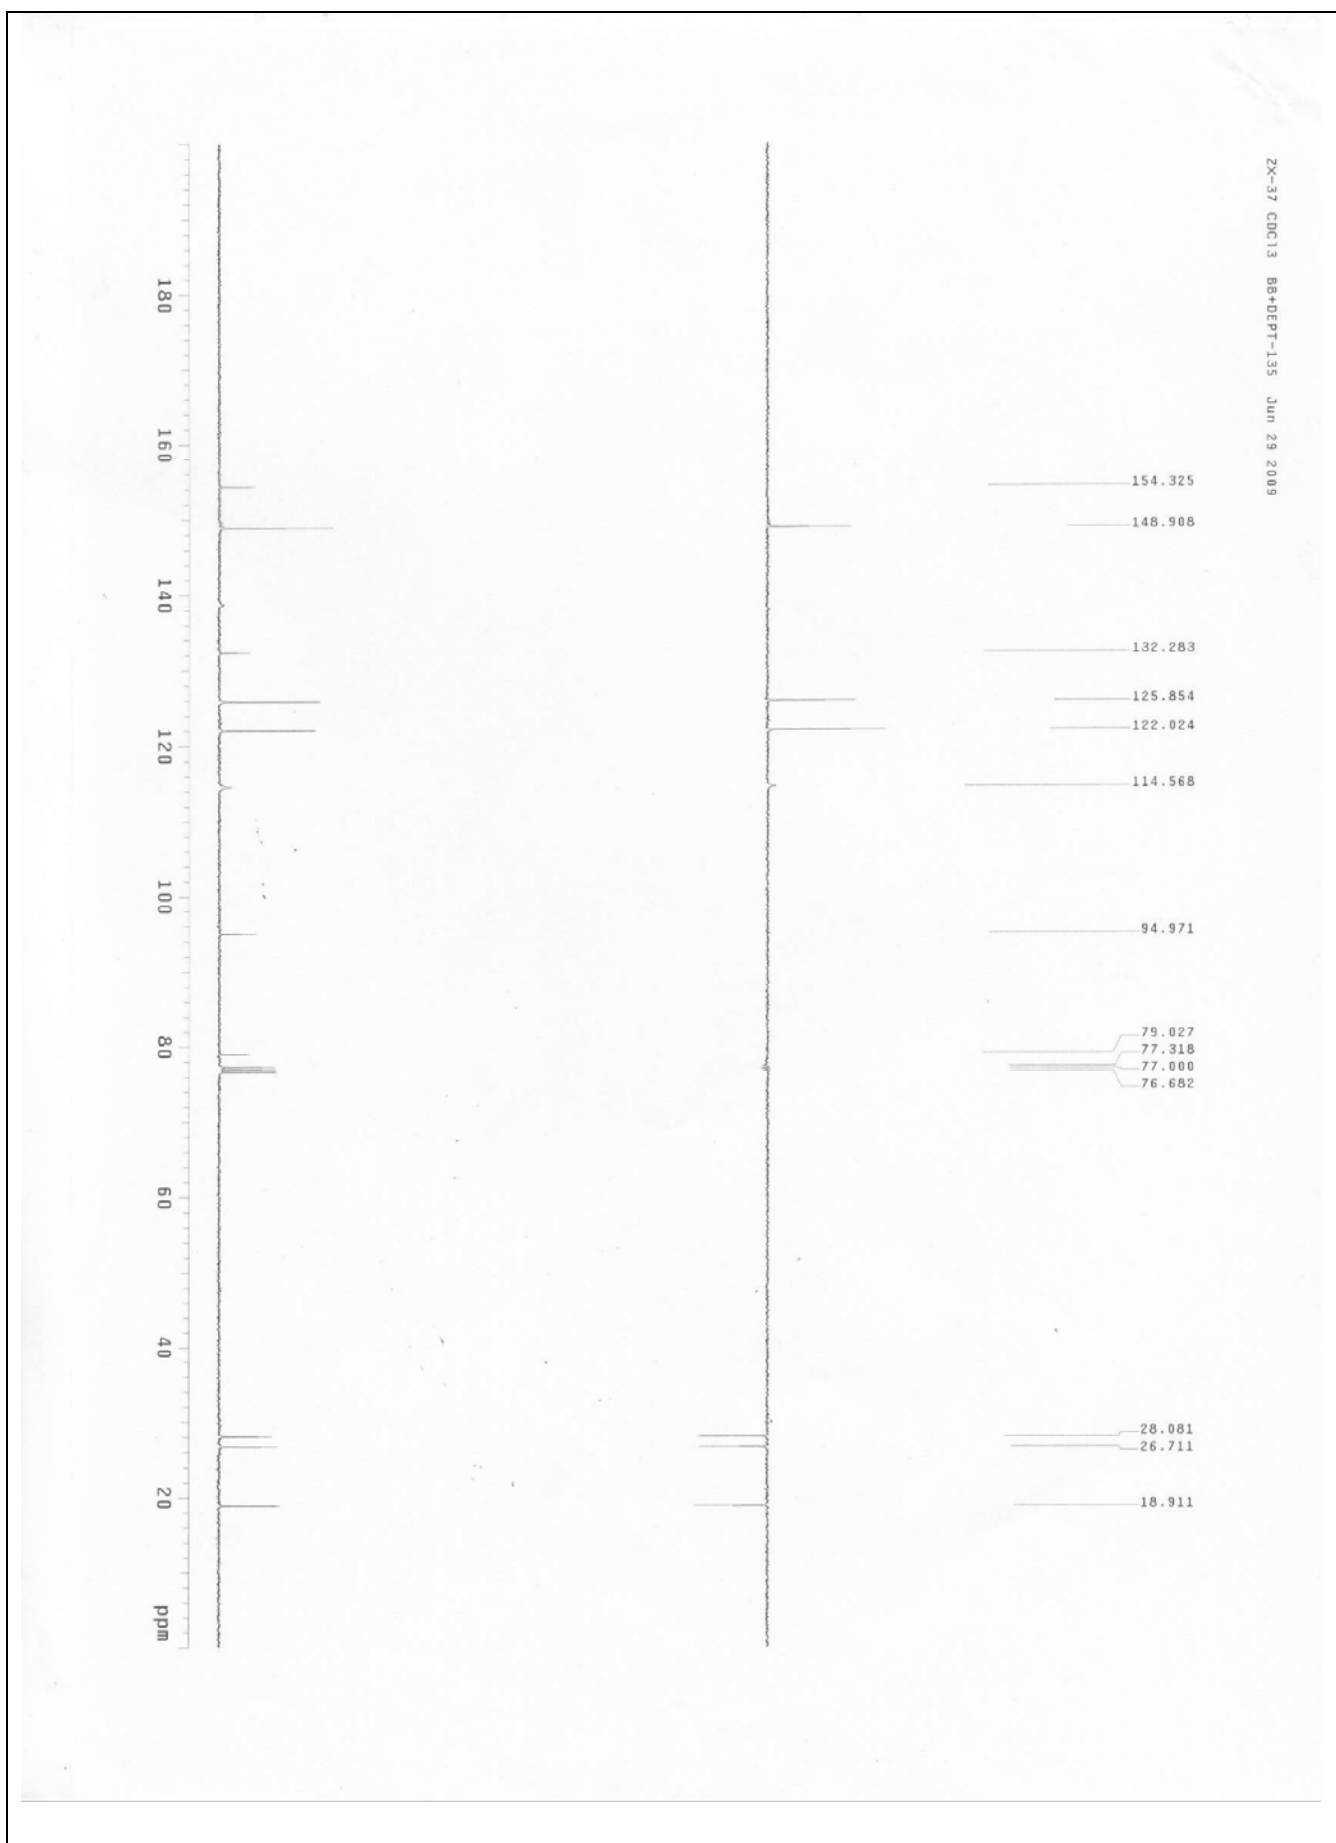



## 2-(Pent-4-ynyl)-1*H*-naphtho[2,3-*d*]imidazole (A13)

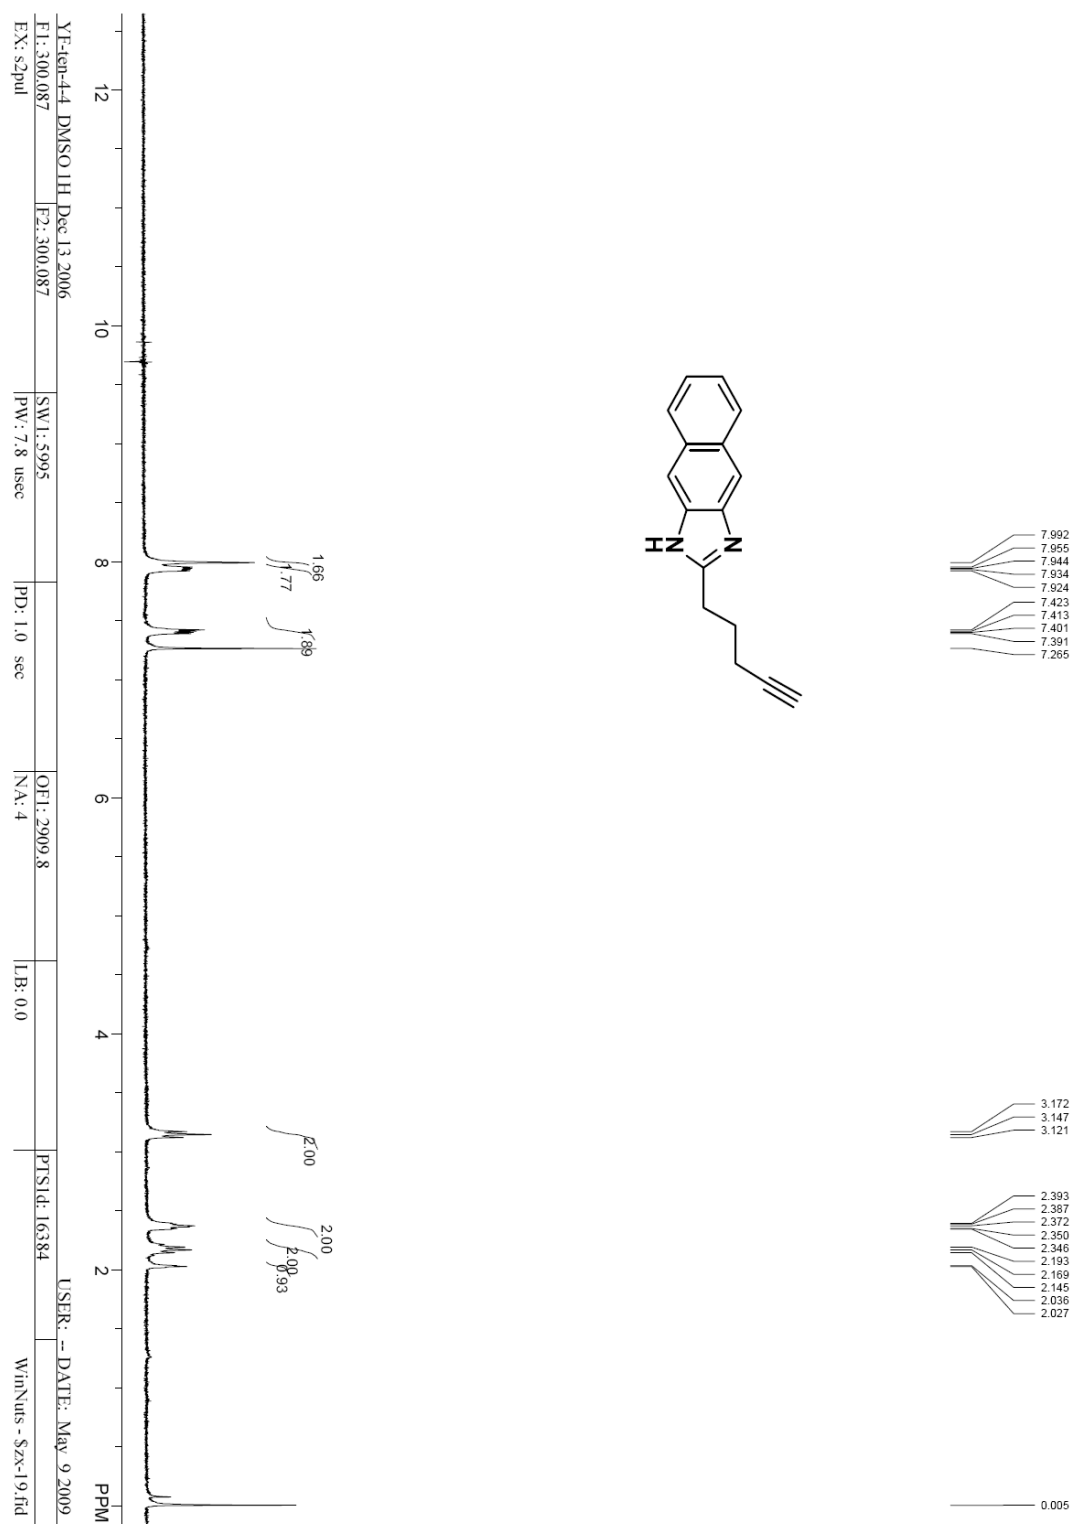

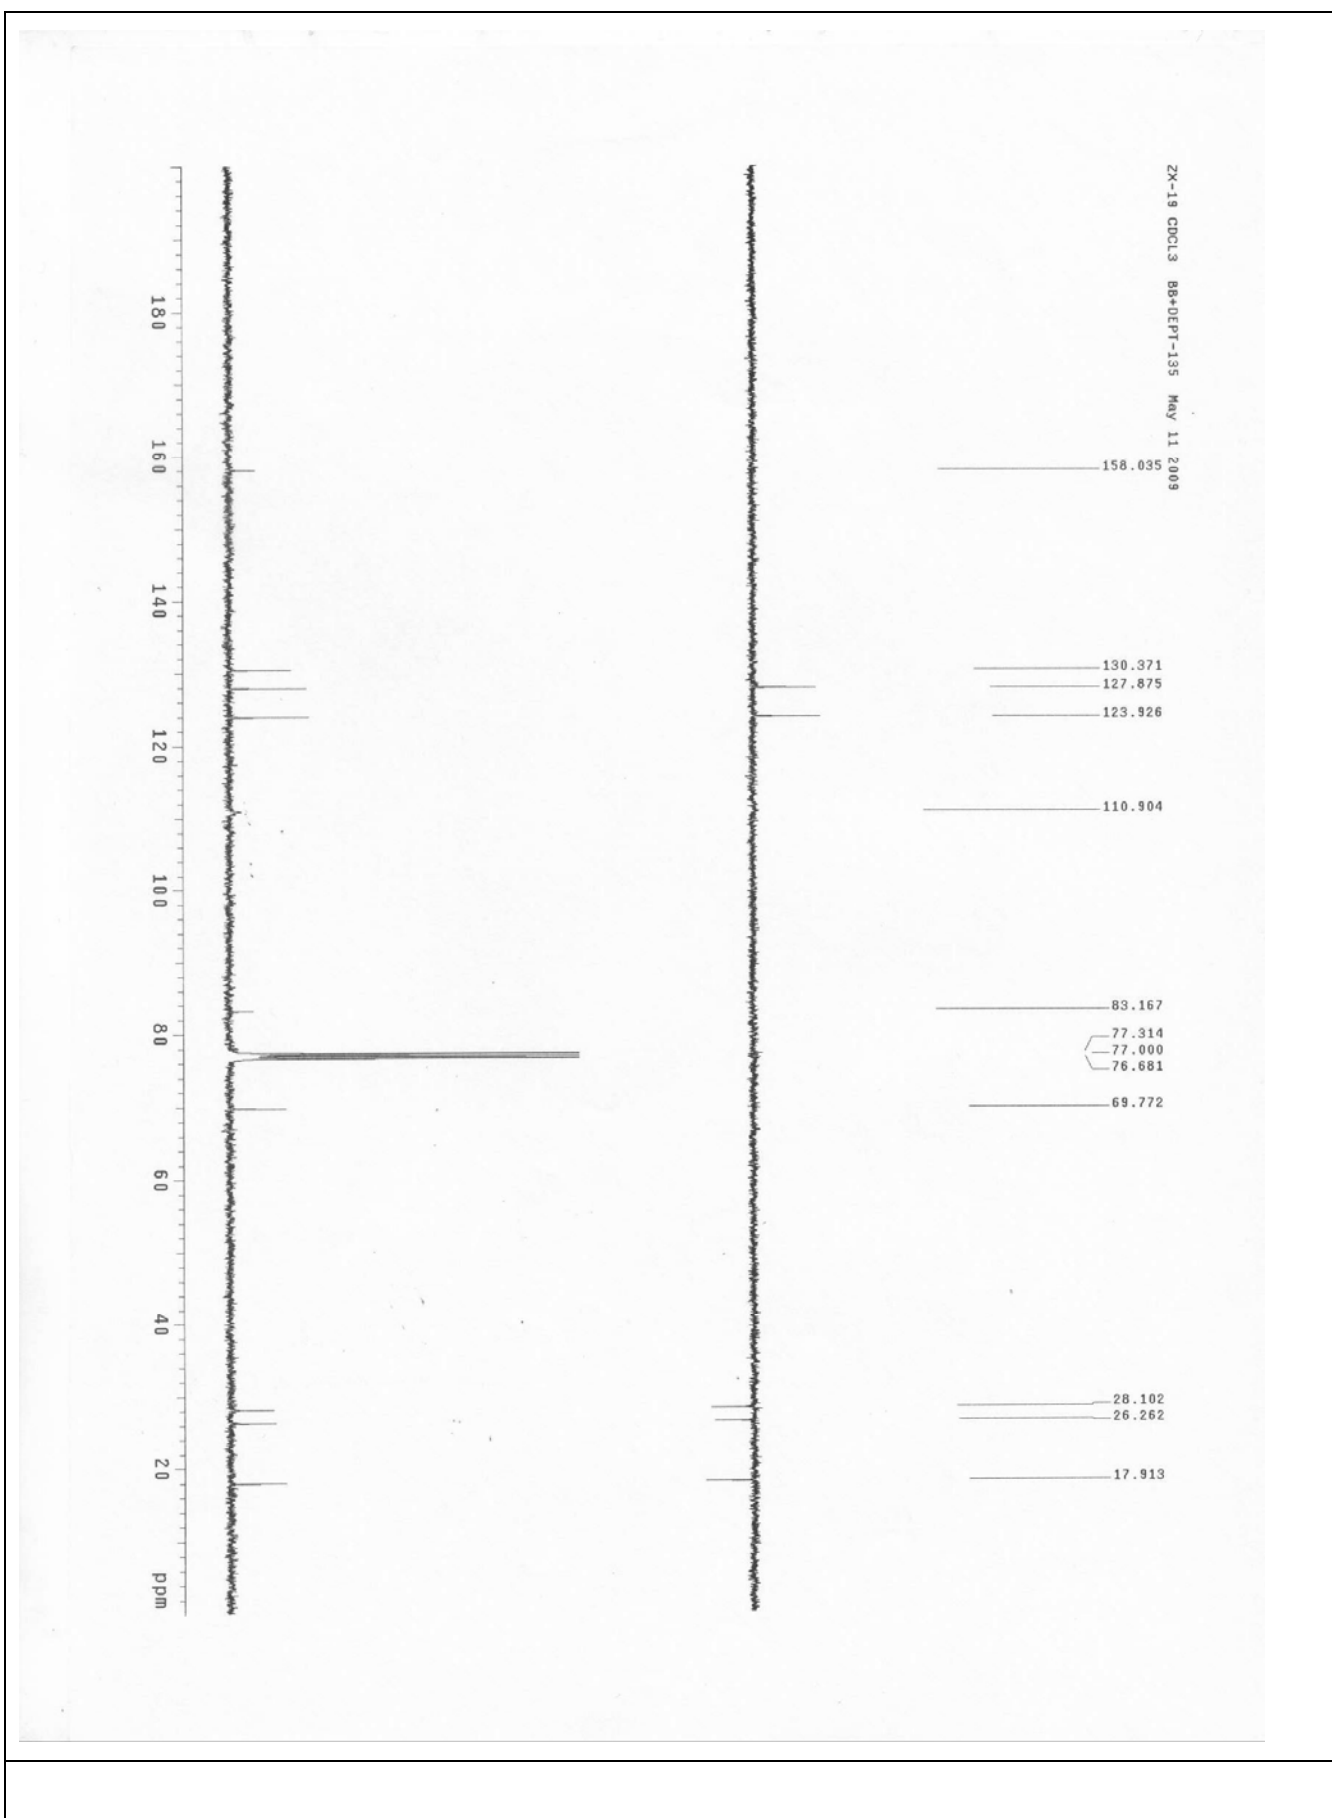

## 2-(5-Phenylpent-4-ynyl)-1H-naphtho[2,3-d]imidazole (A14)

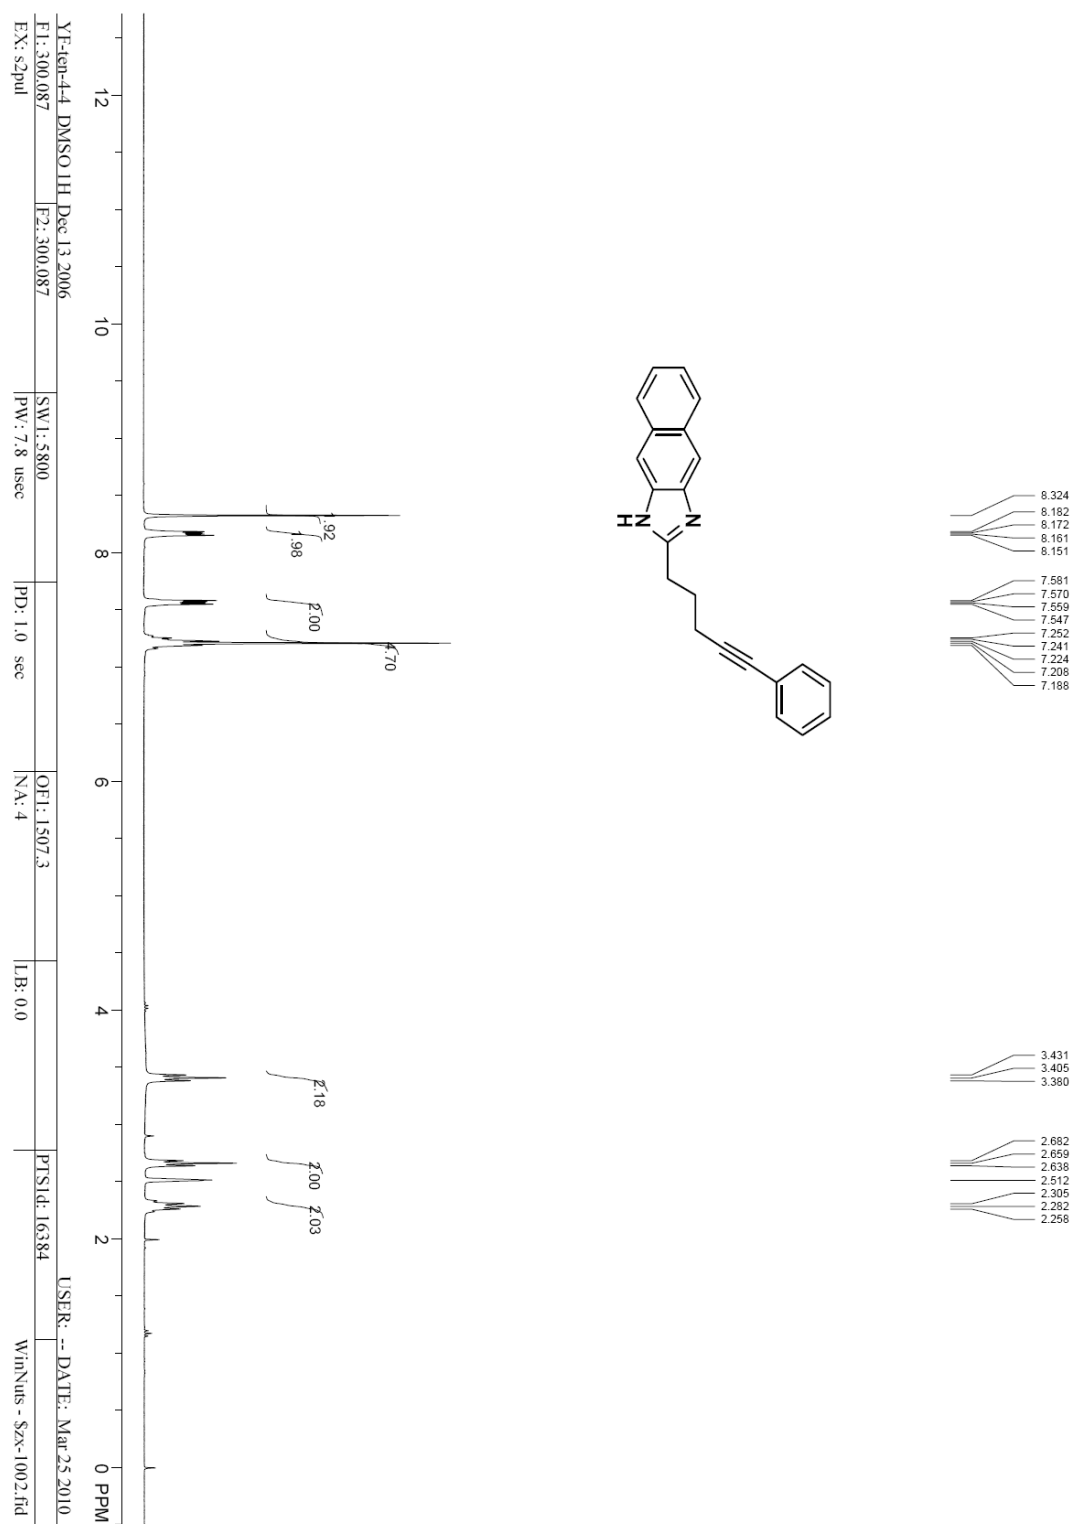

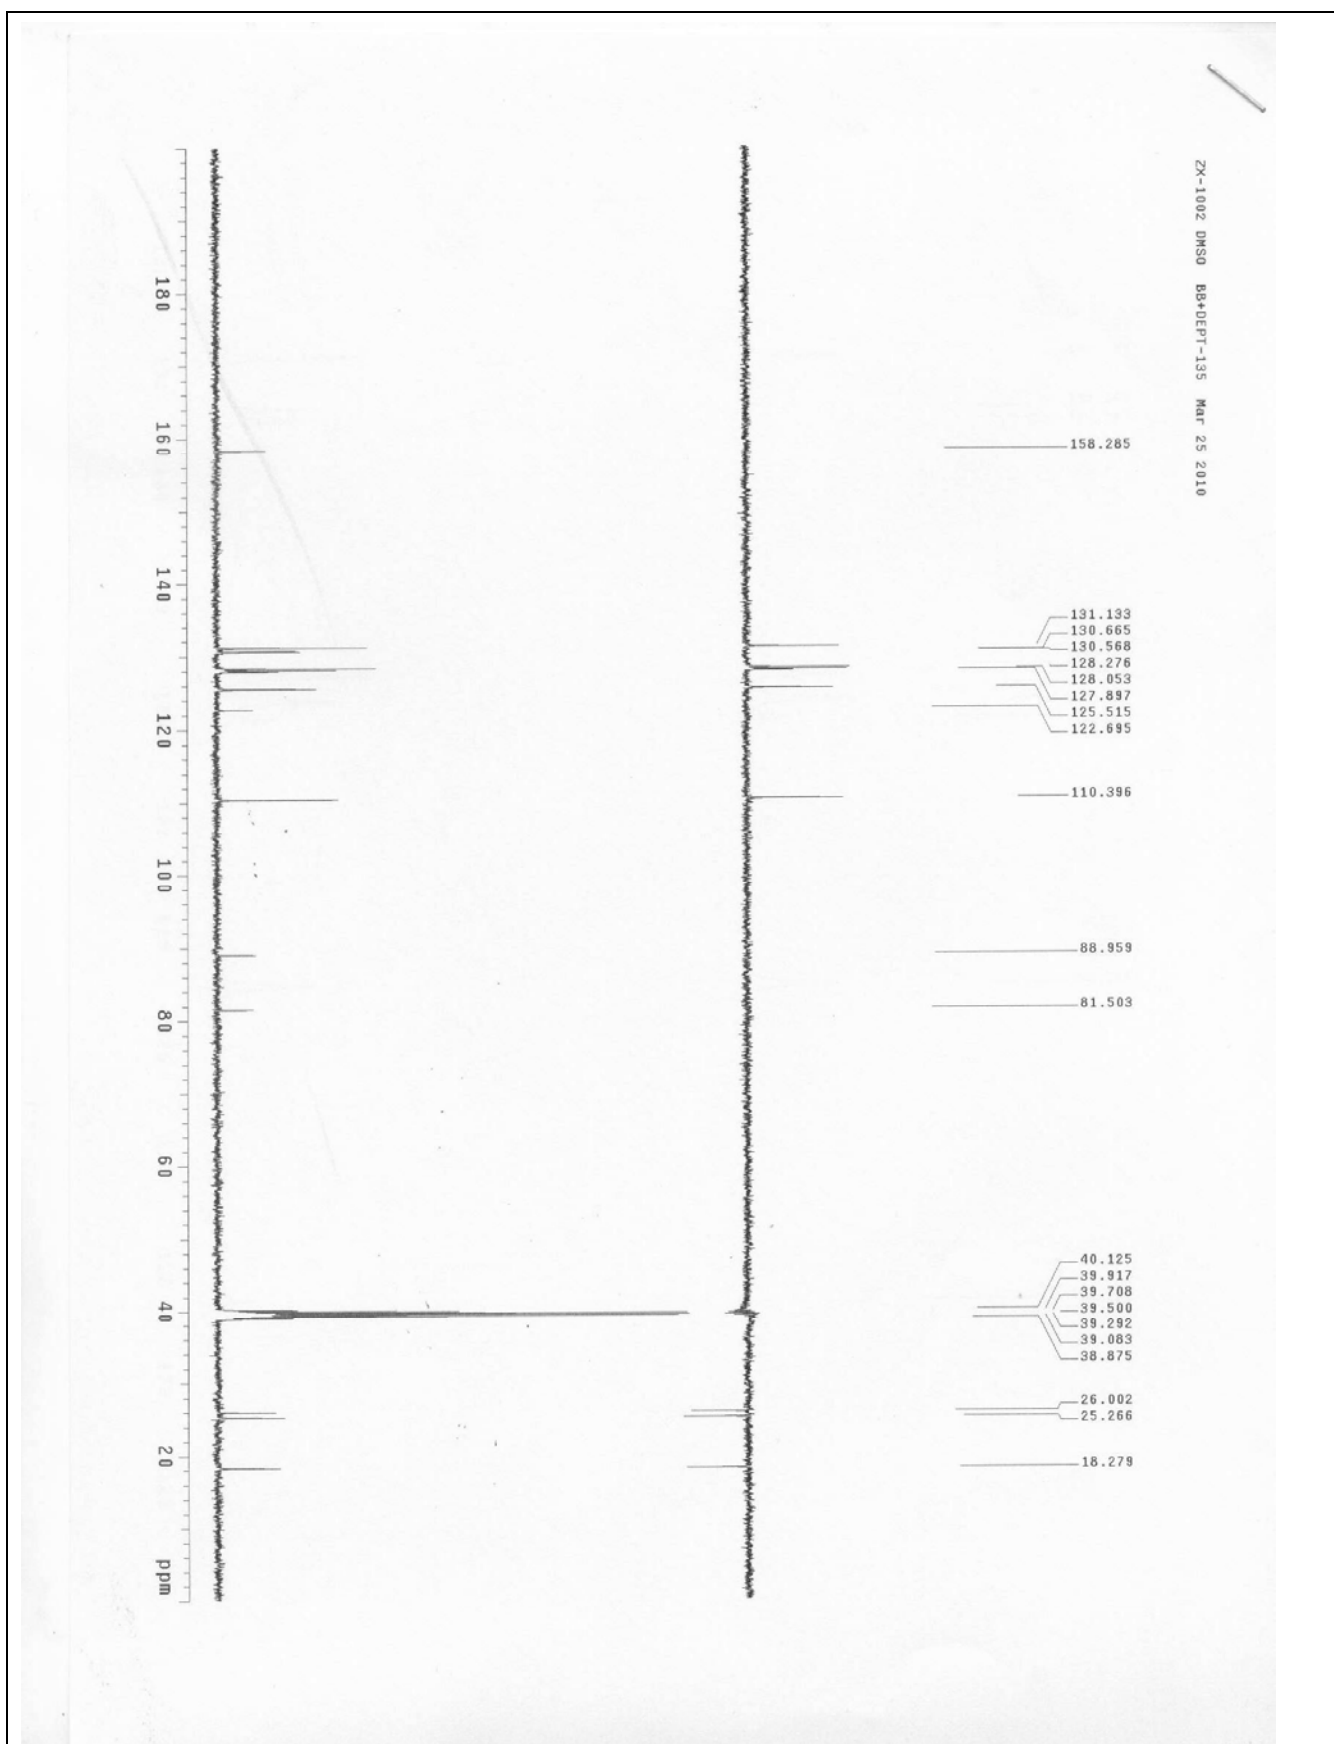

## 2-(Pent-4-ynyl)-1H-perimidine (A15)

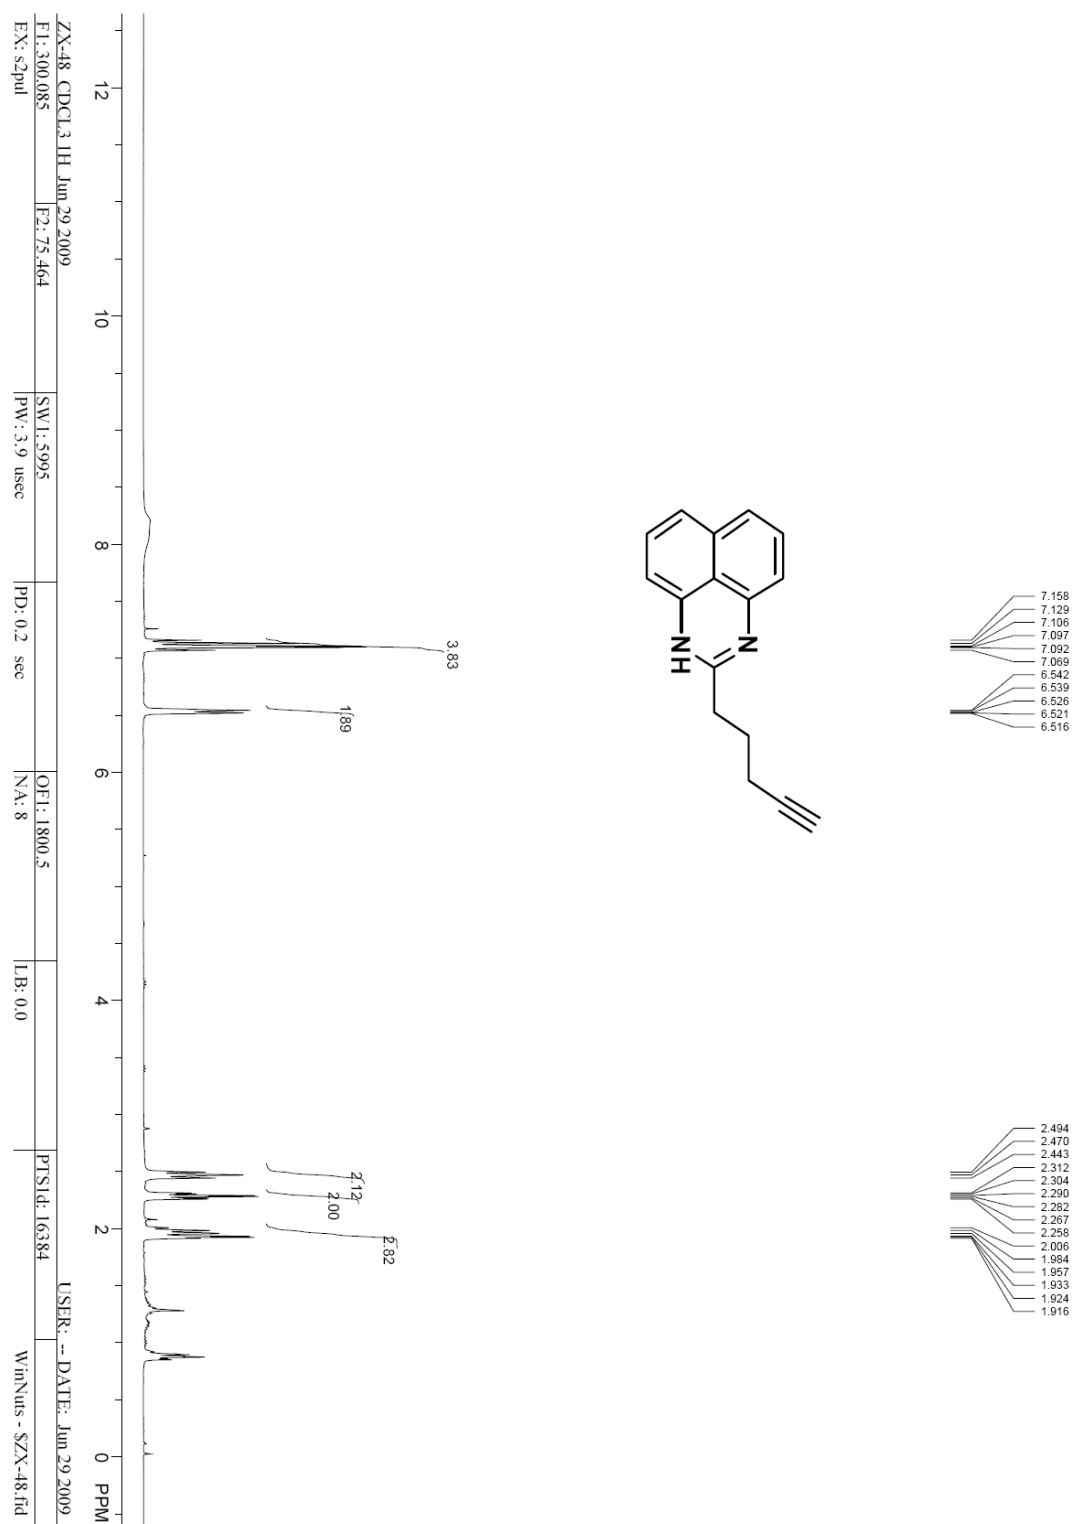

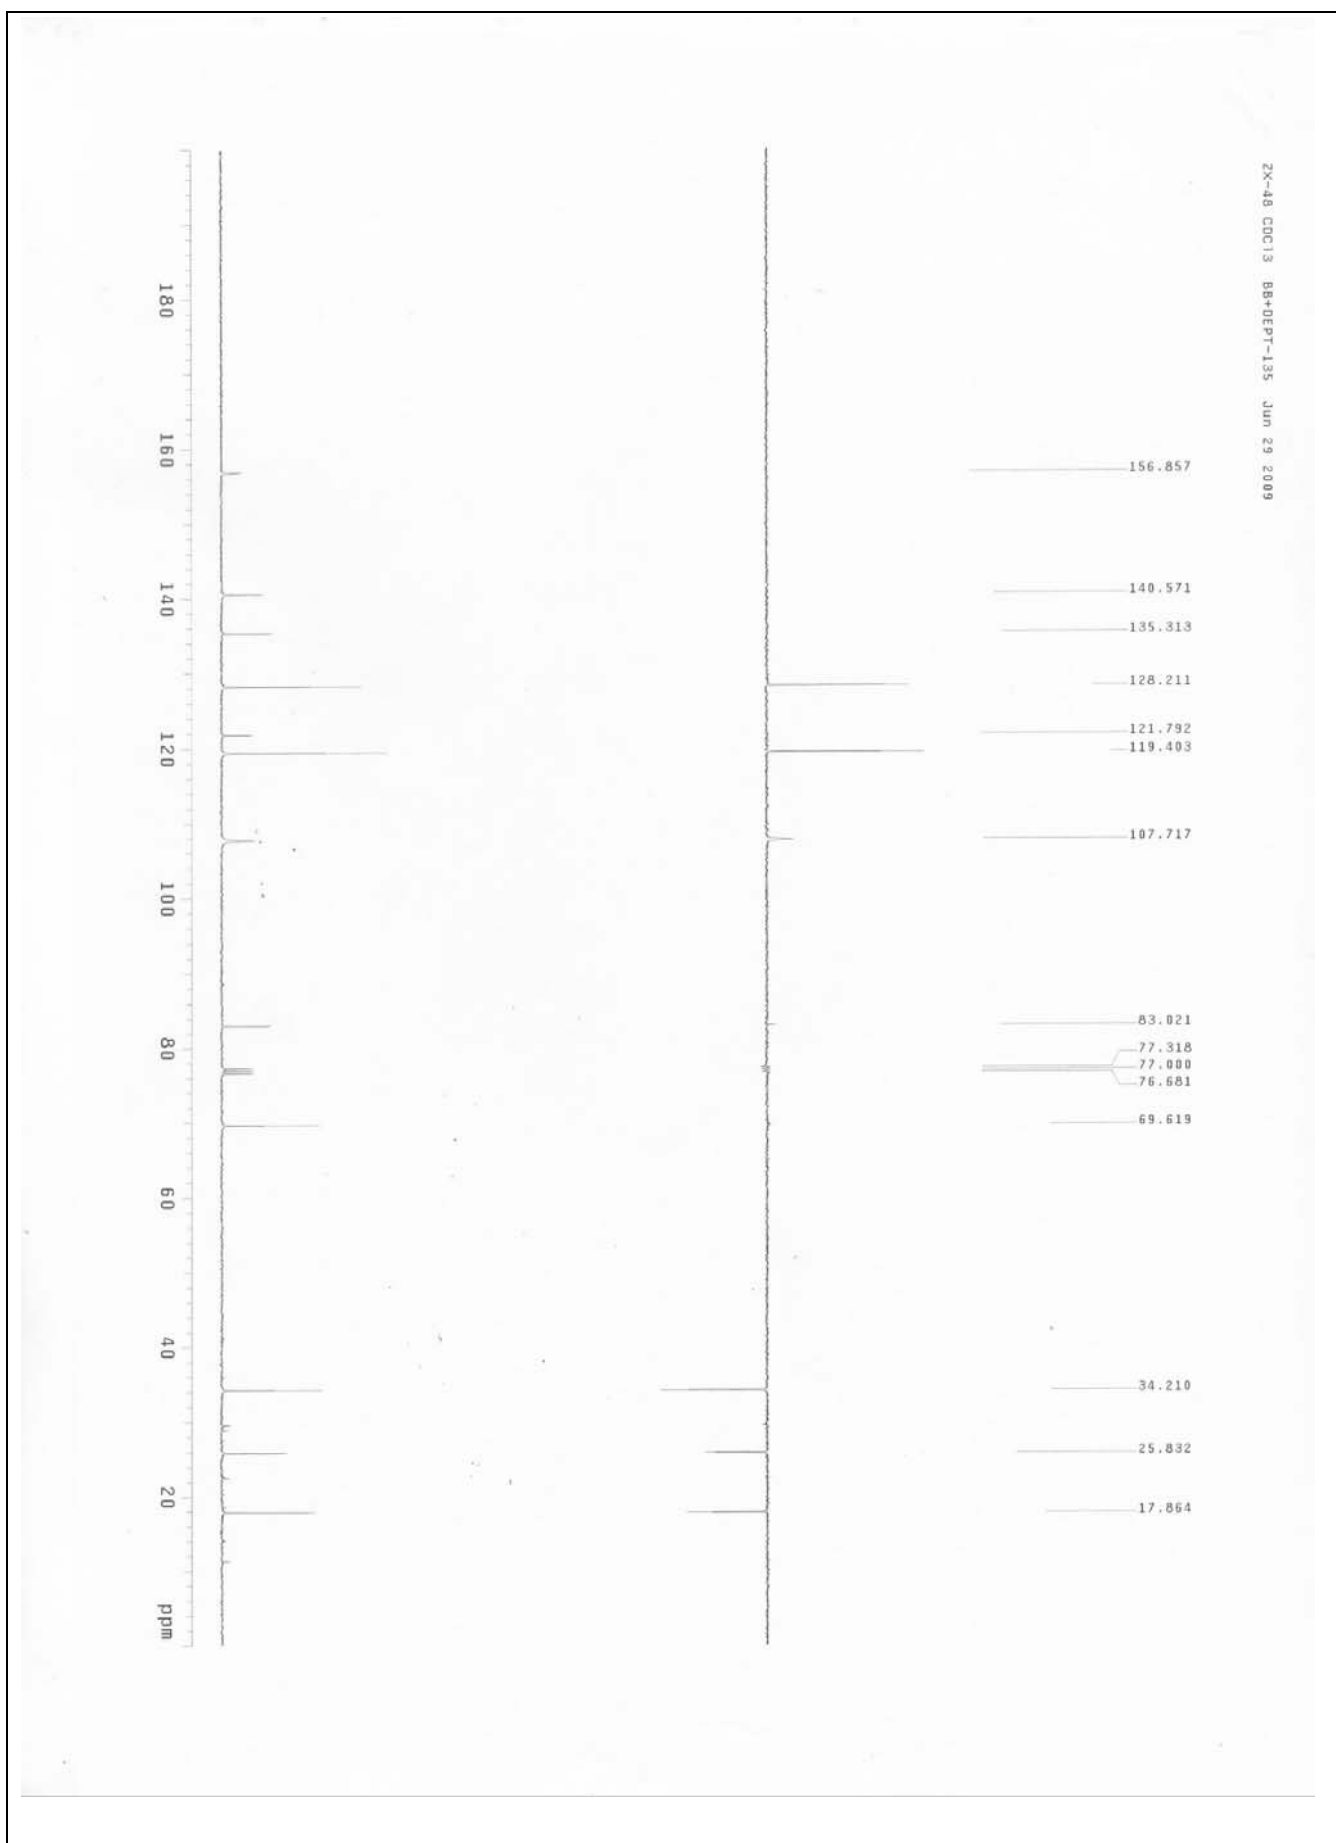

***N*-(Prop-2-ynyl)benzo[d]thiazol-2-amine (A16)**

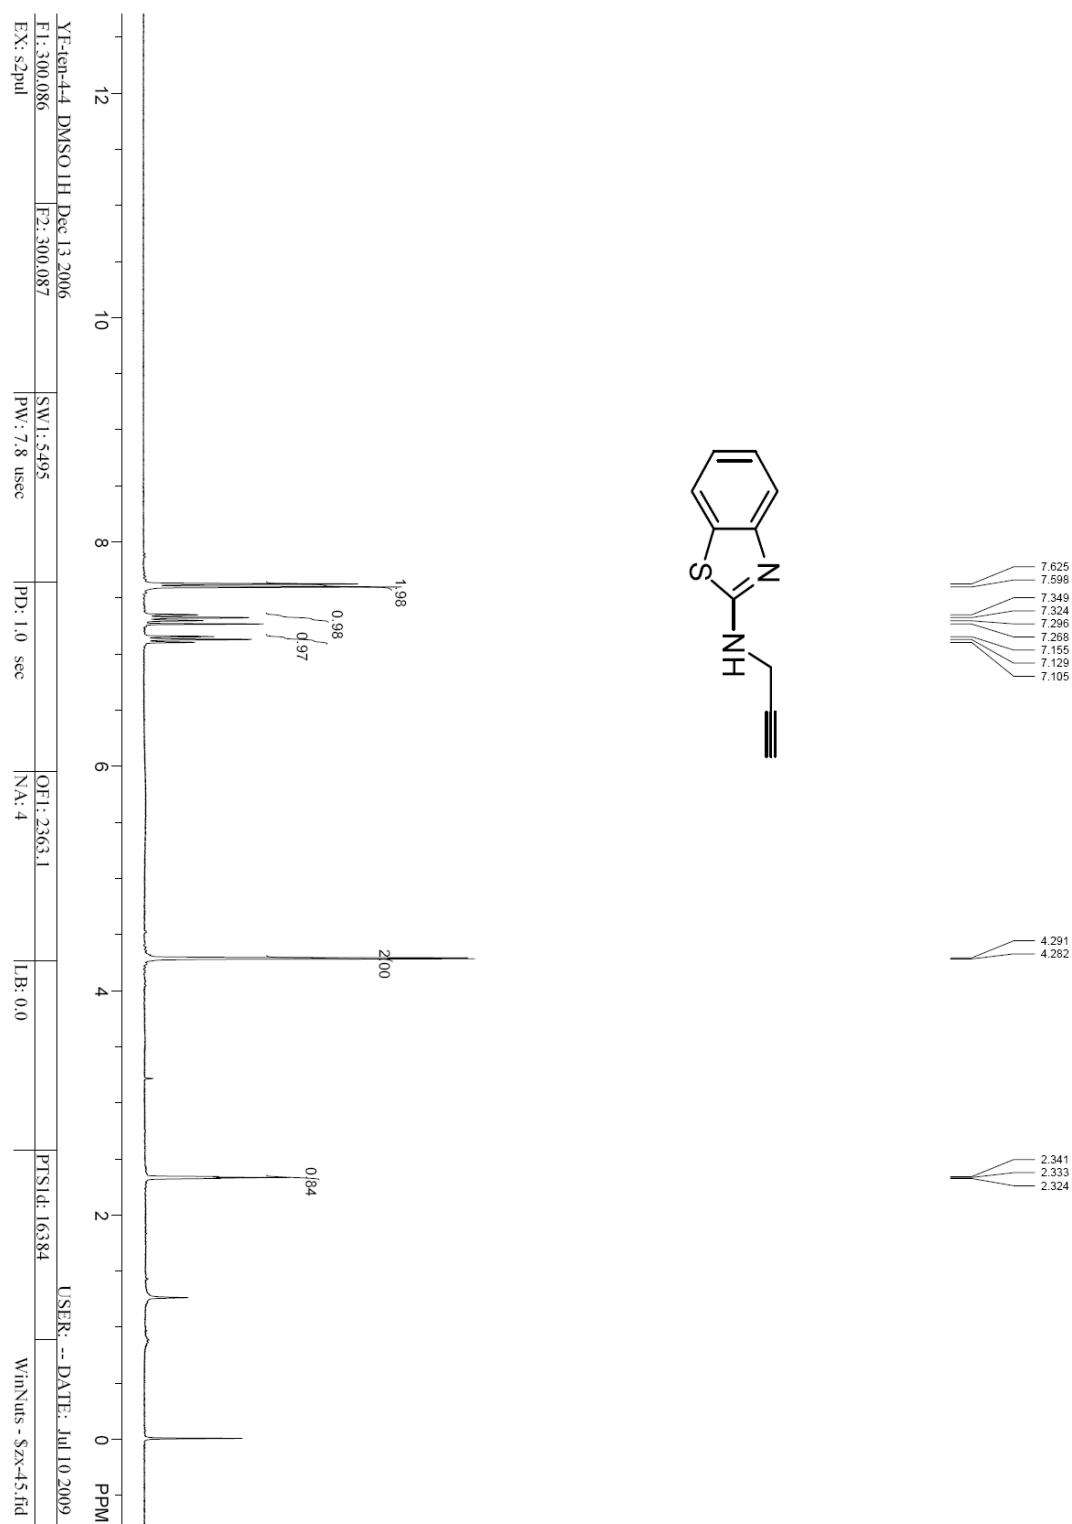

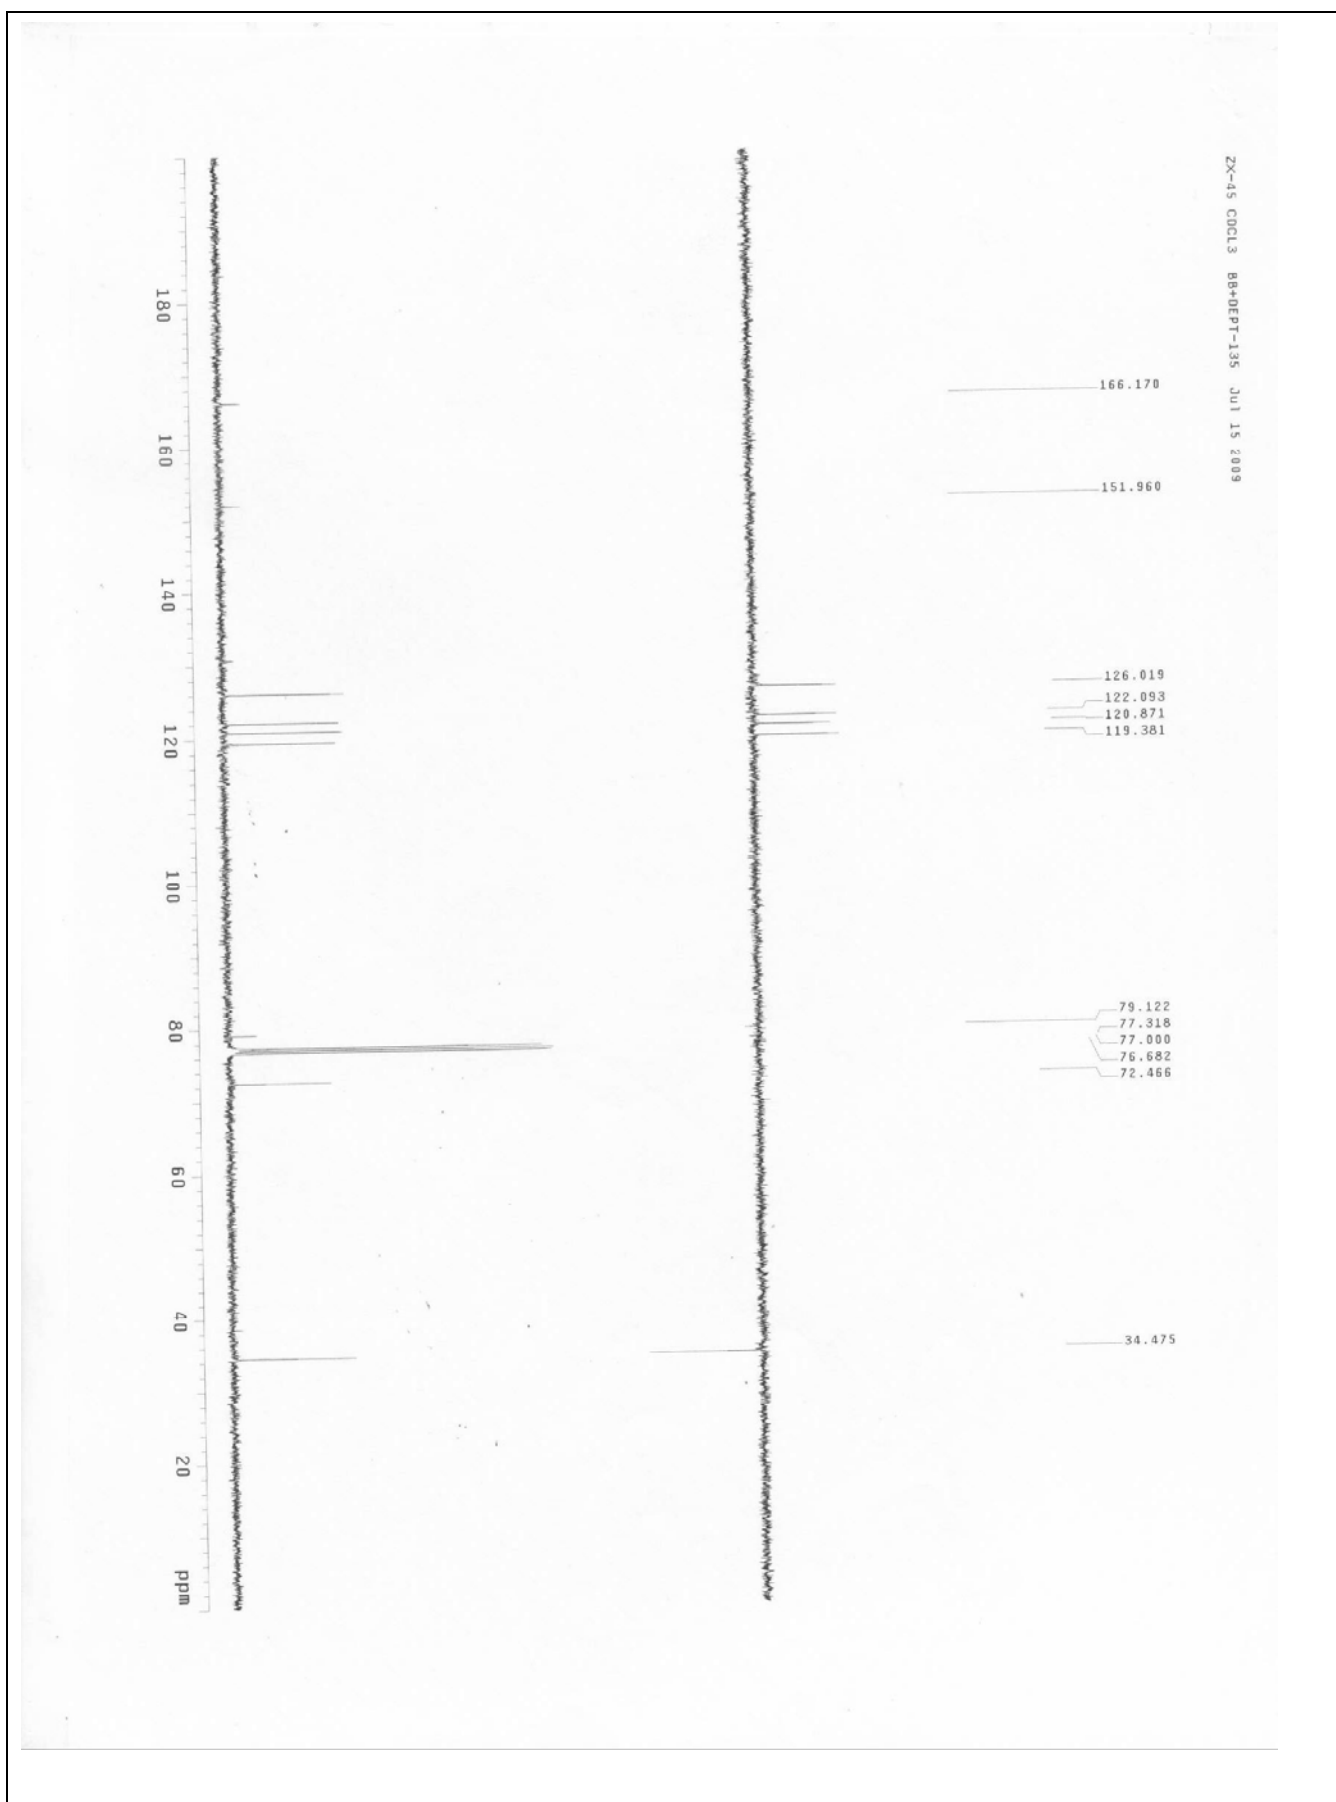



## 2-((Prop-2-ynyloxy)methyl)-1*H*-benzo[d]imidazole (A17)

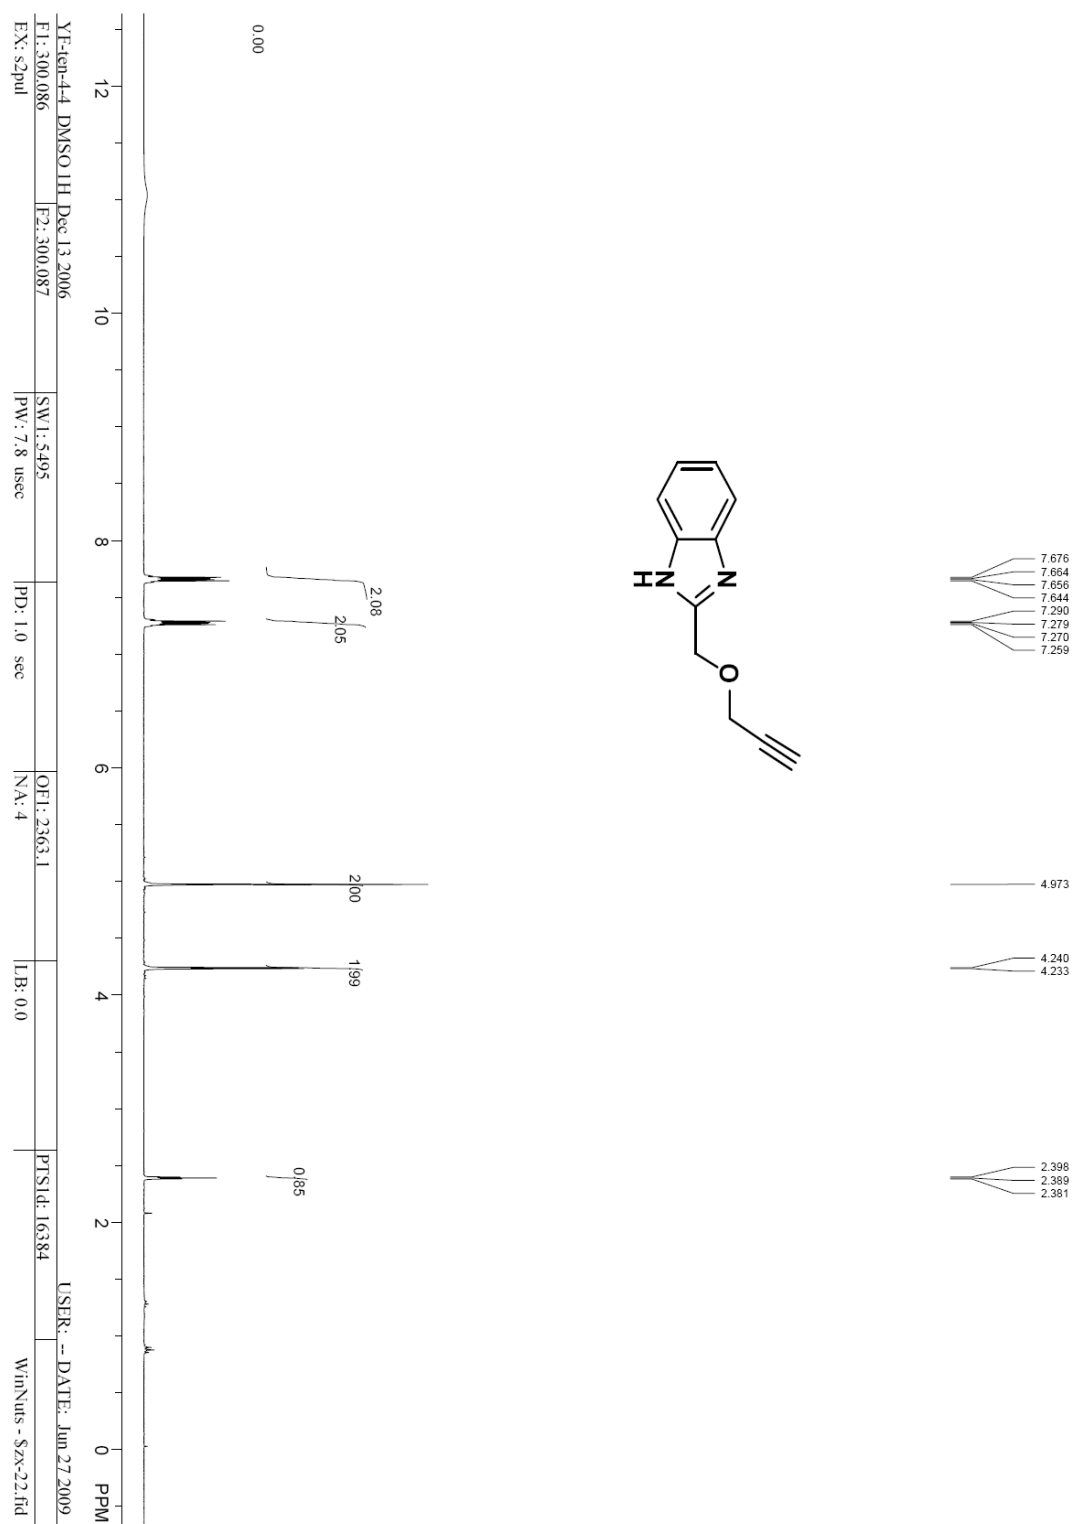

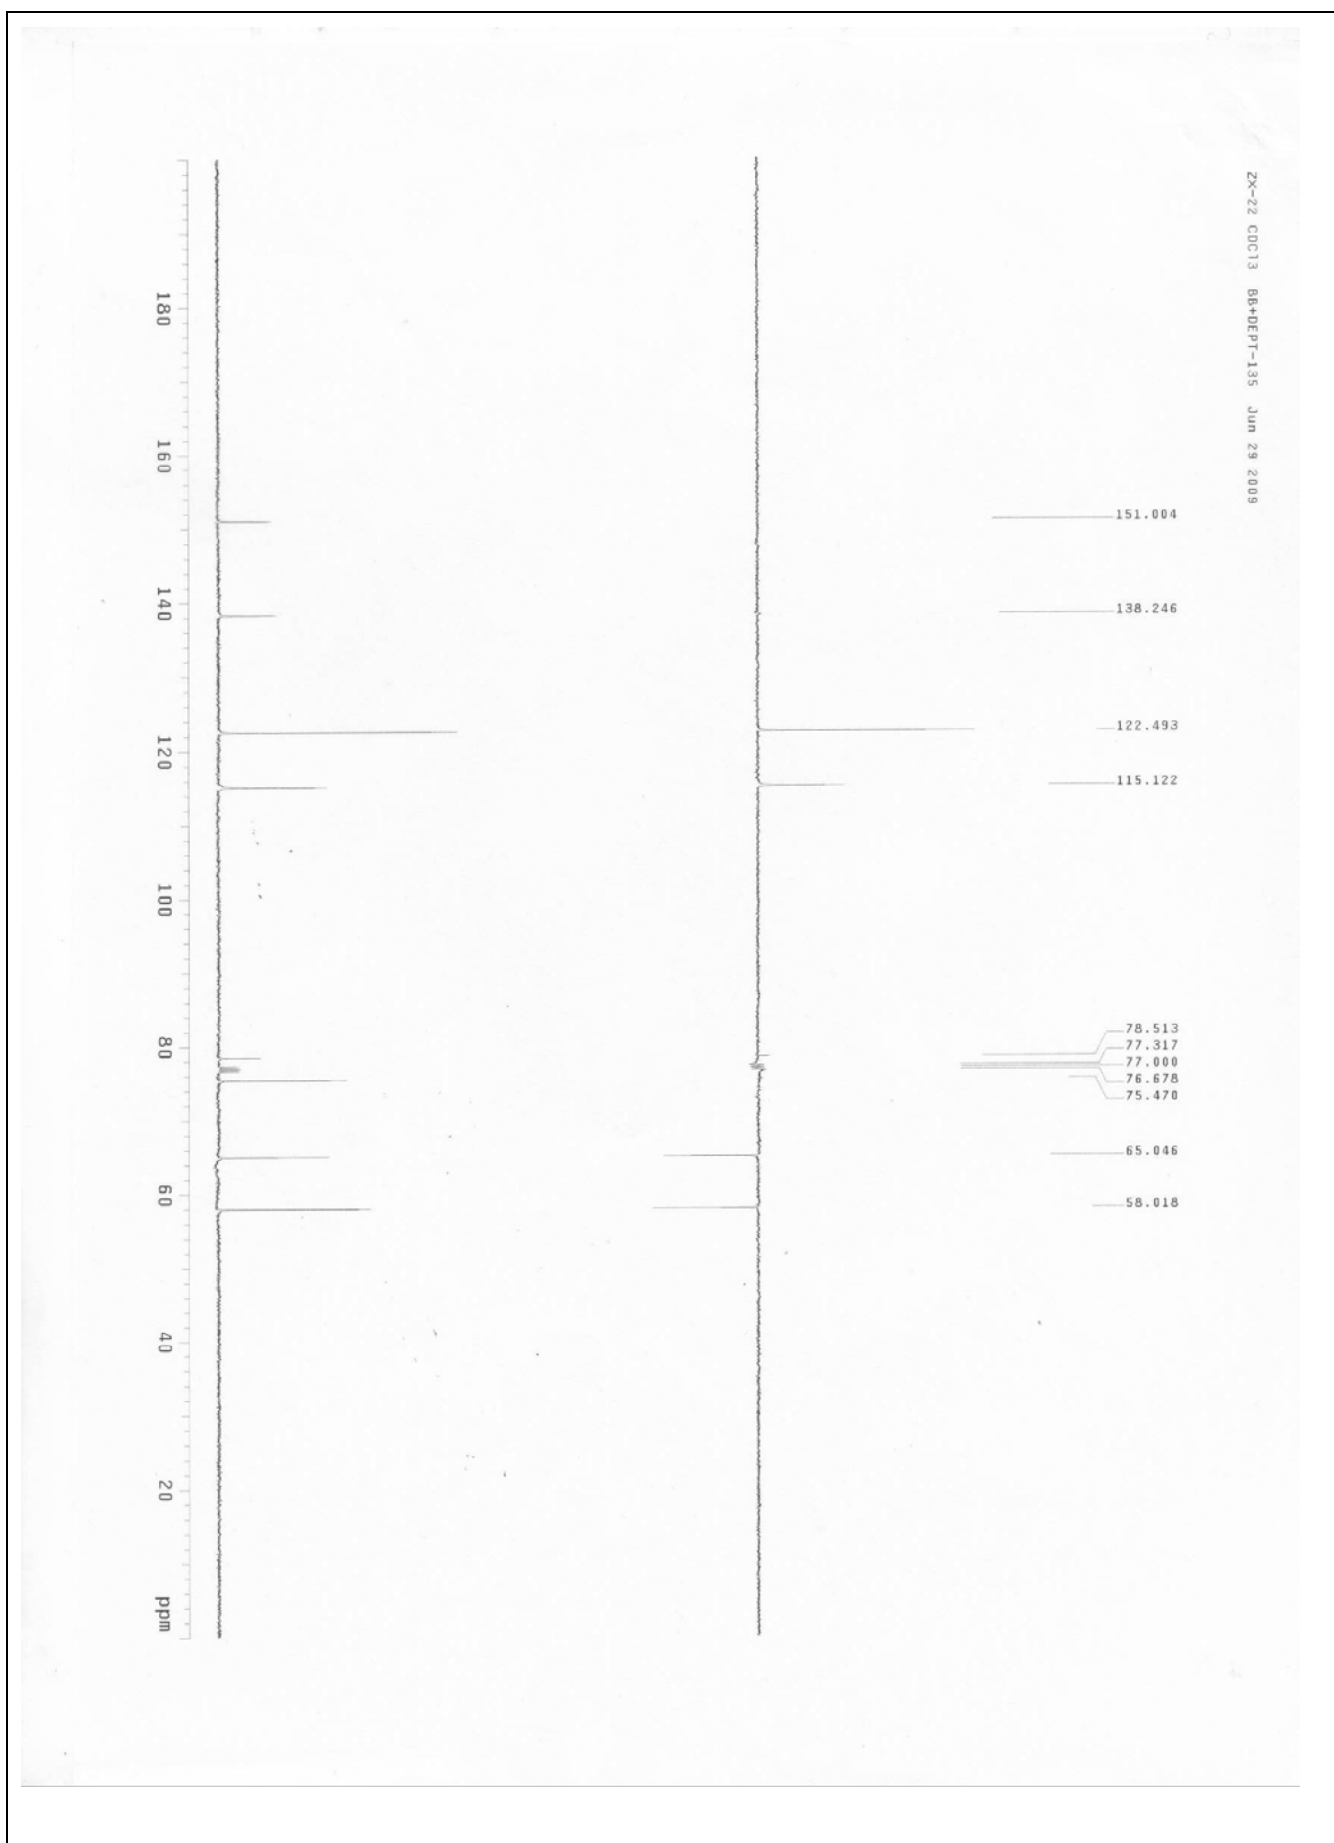

# 5,6-Dimethyl-2-((prop-2-ynyloxy)methyl)-1*H*-benzo[*d*]imidazole (A18)

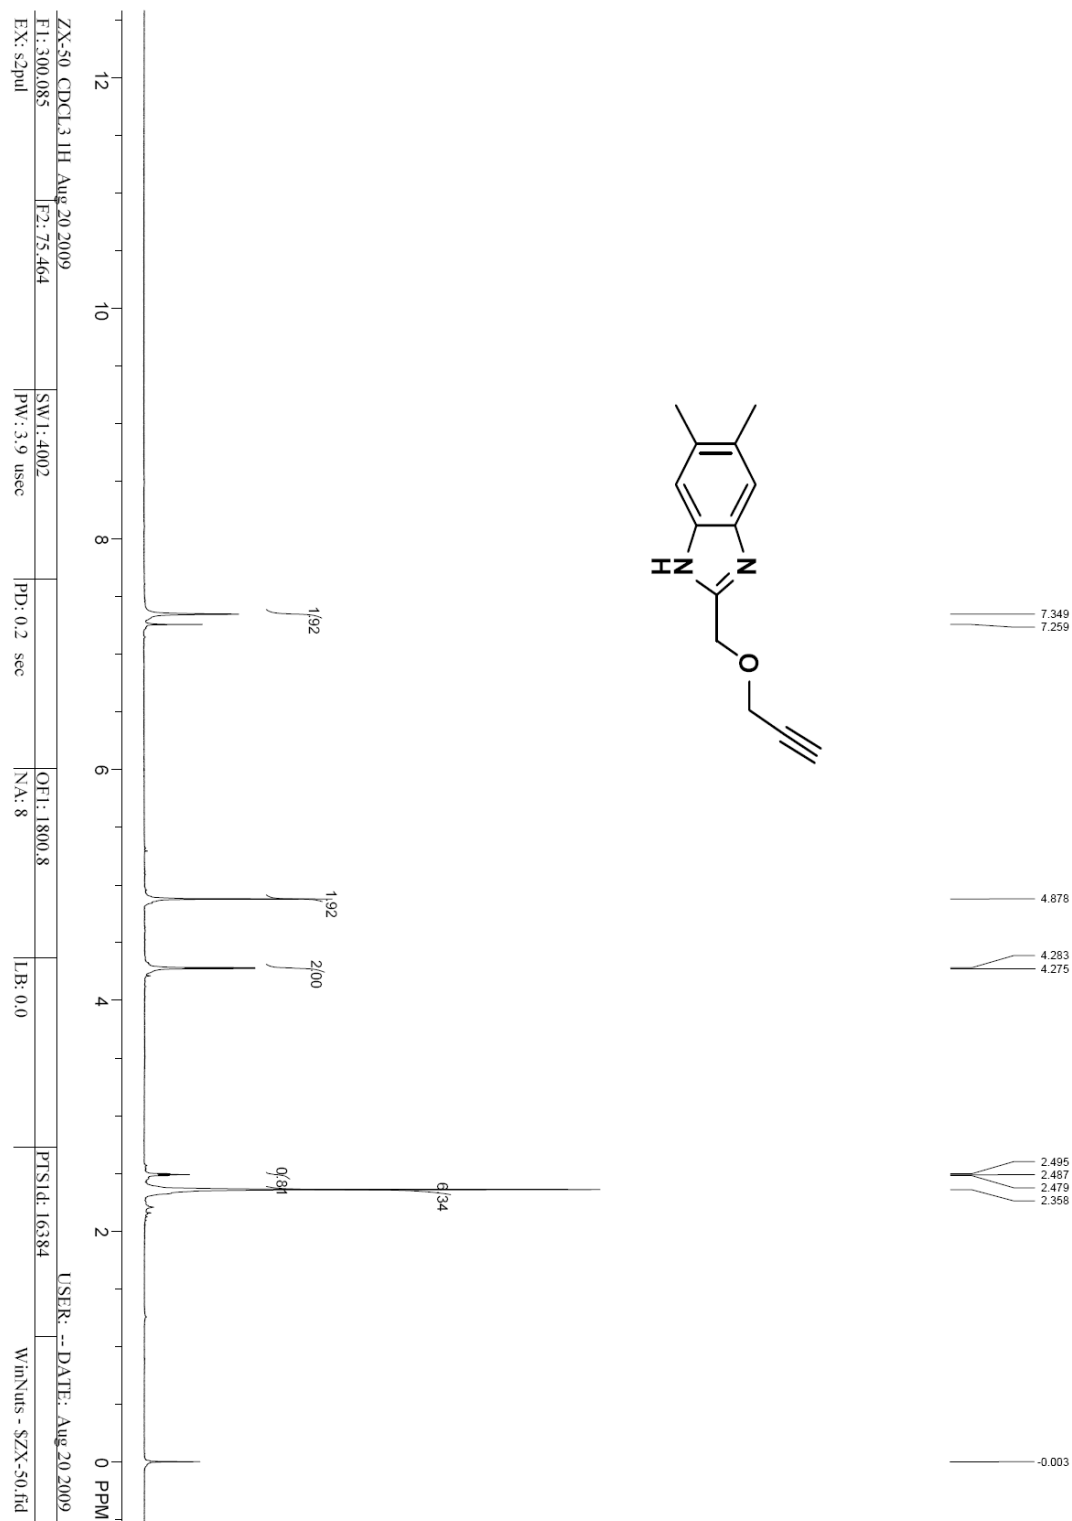

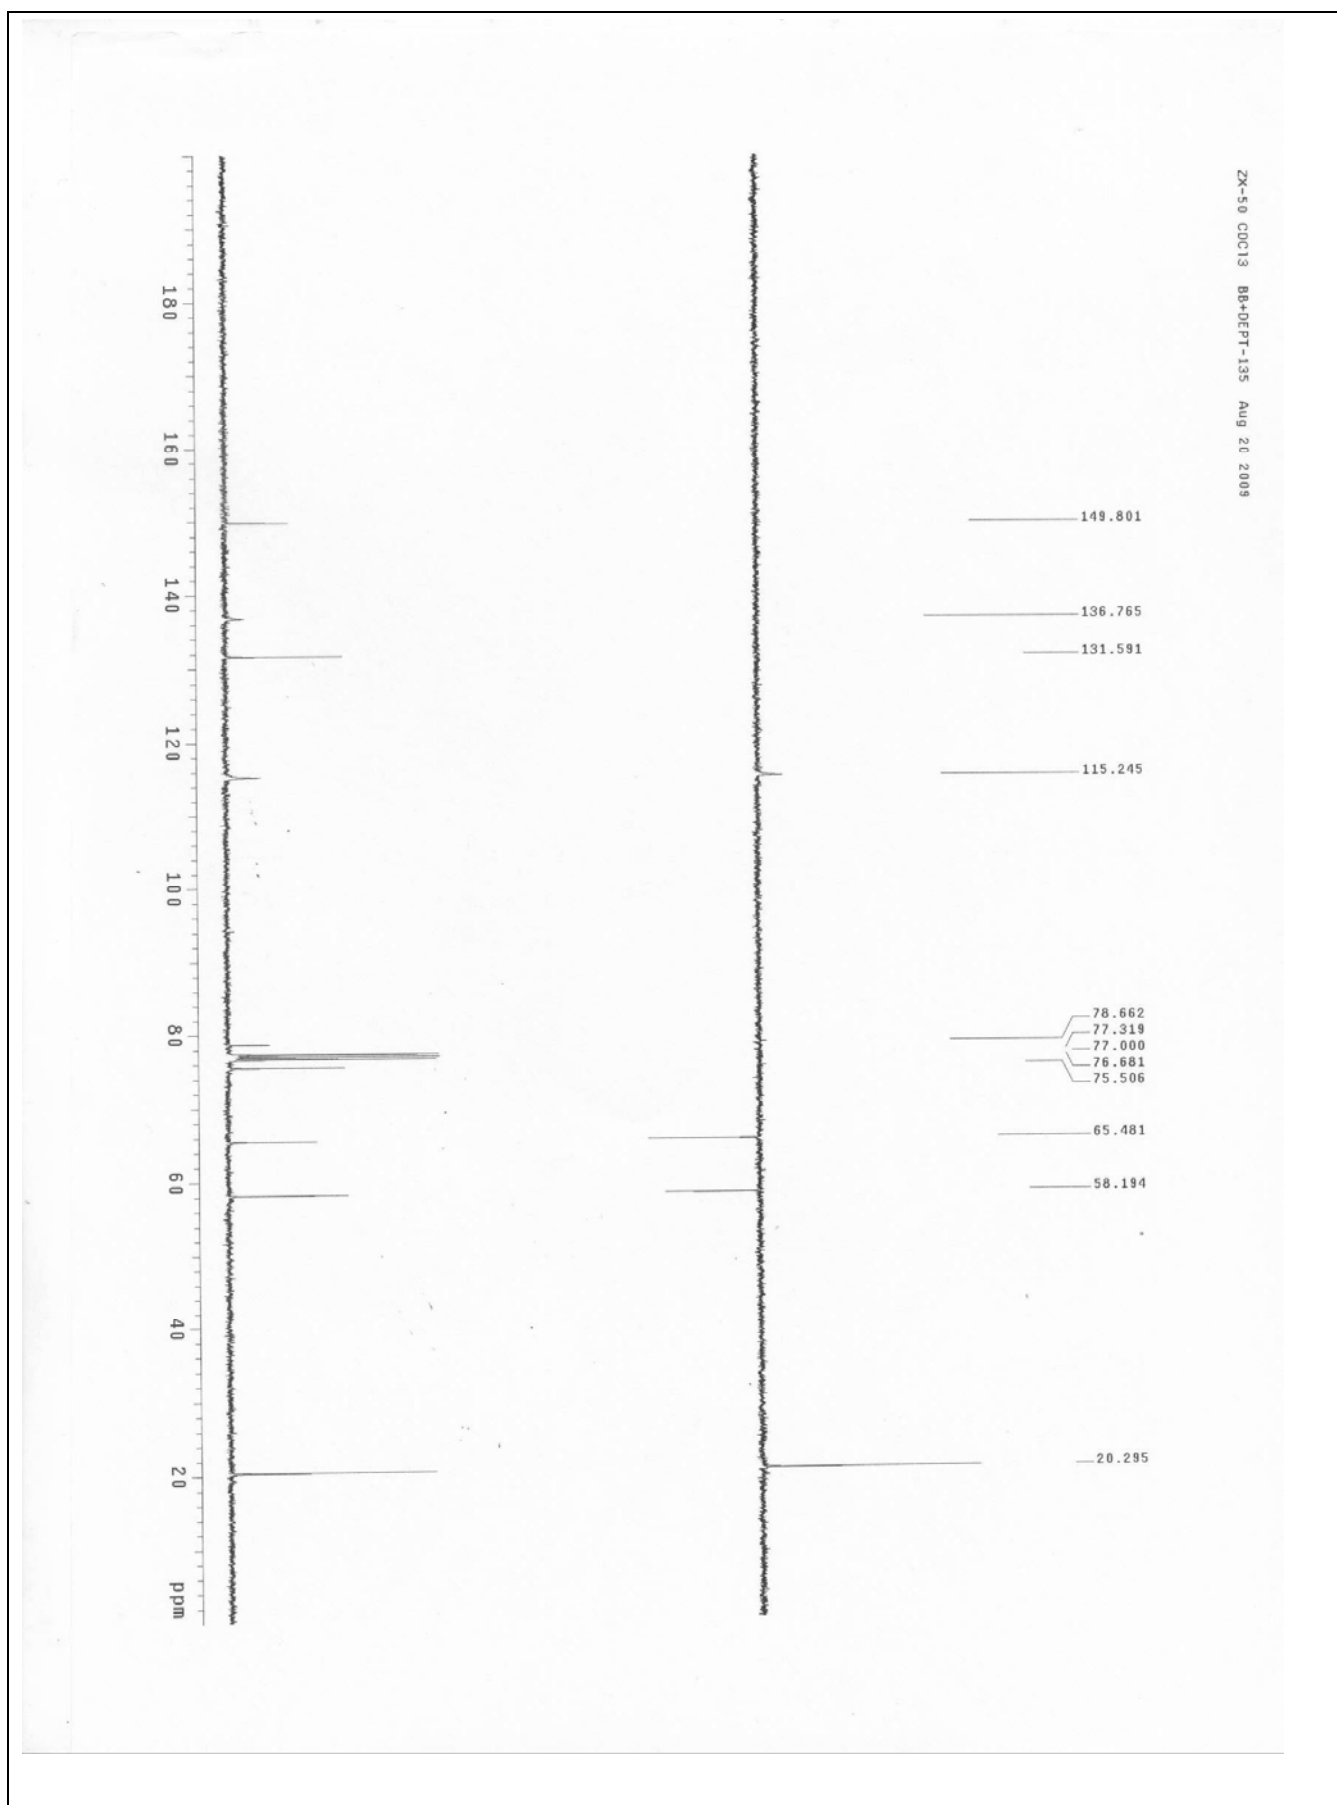

# **5,6-Dichloro-2-((prop-2-ynyloxy)methyl)-1*H*-benzo[*d*]imidazole (A19)**

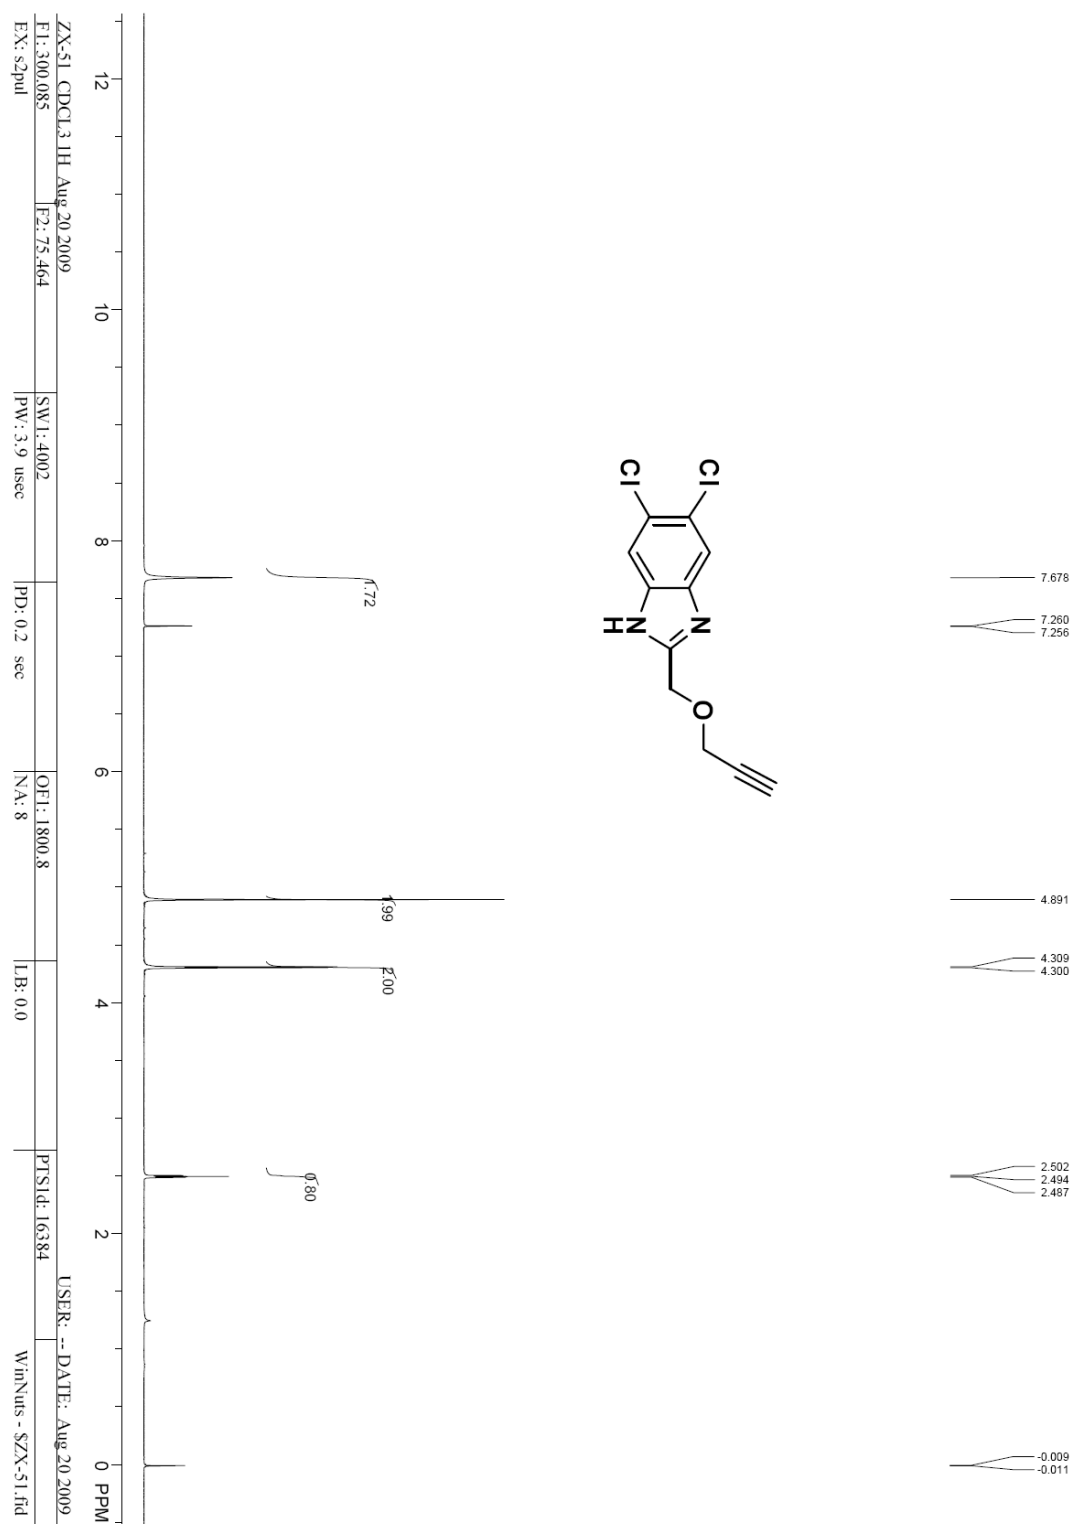

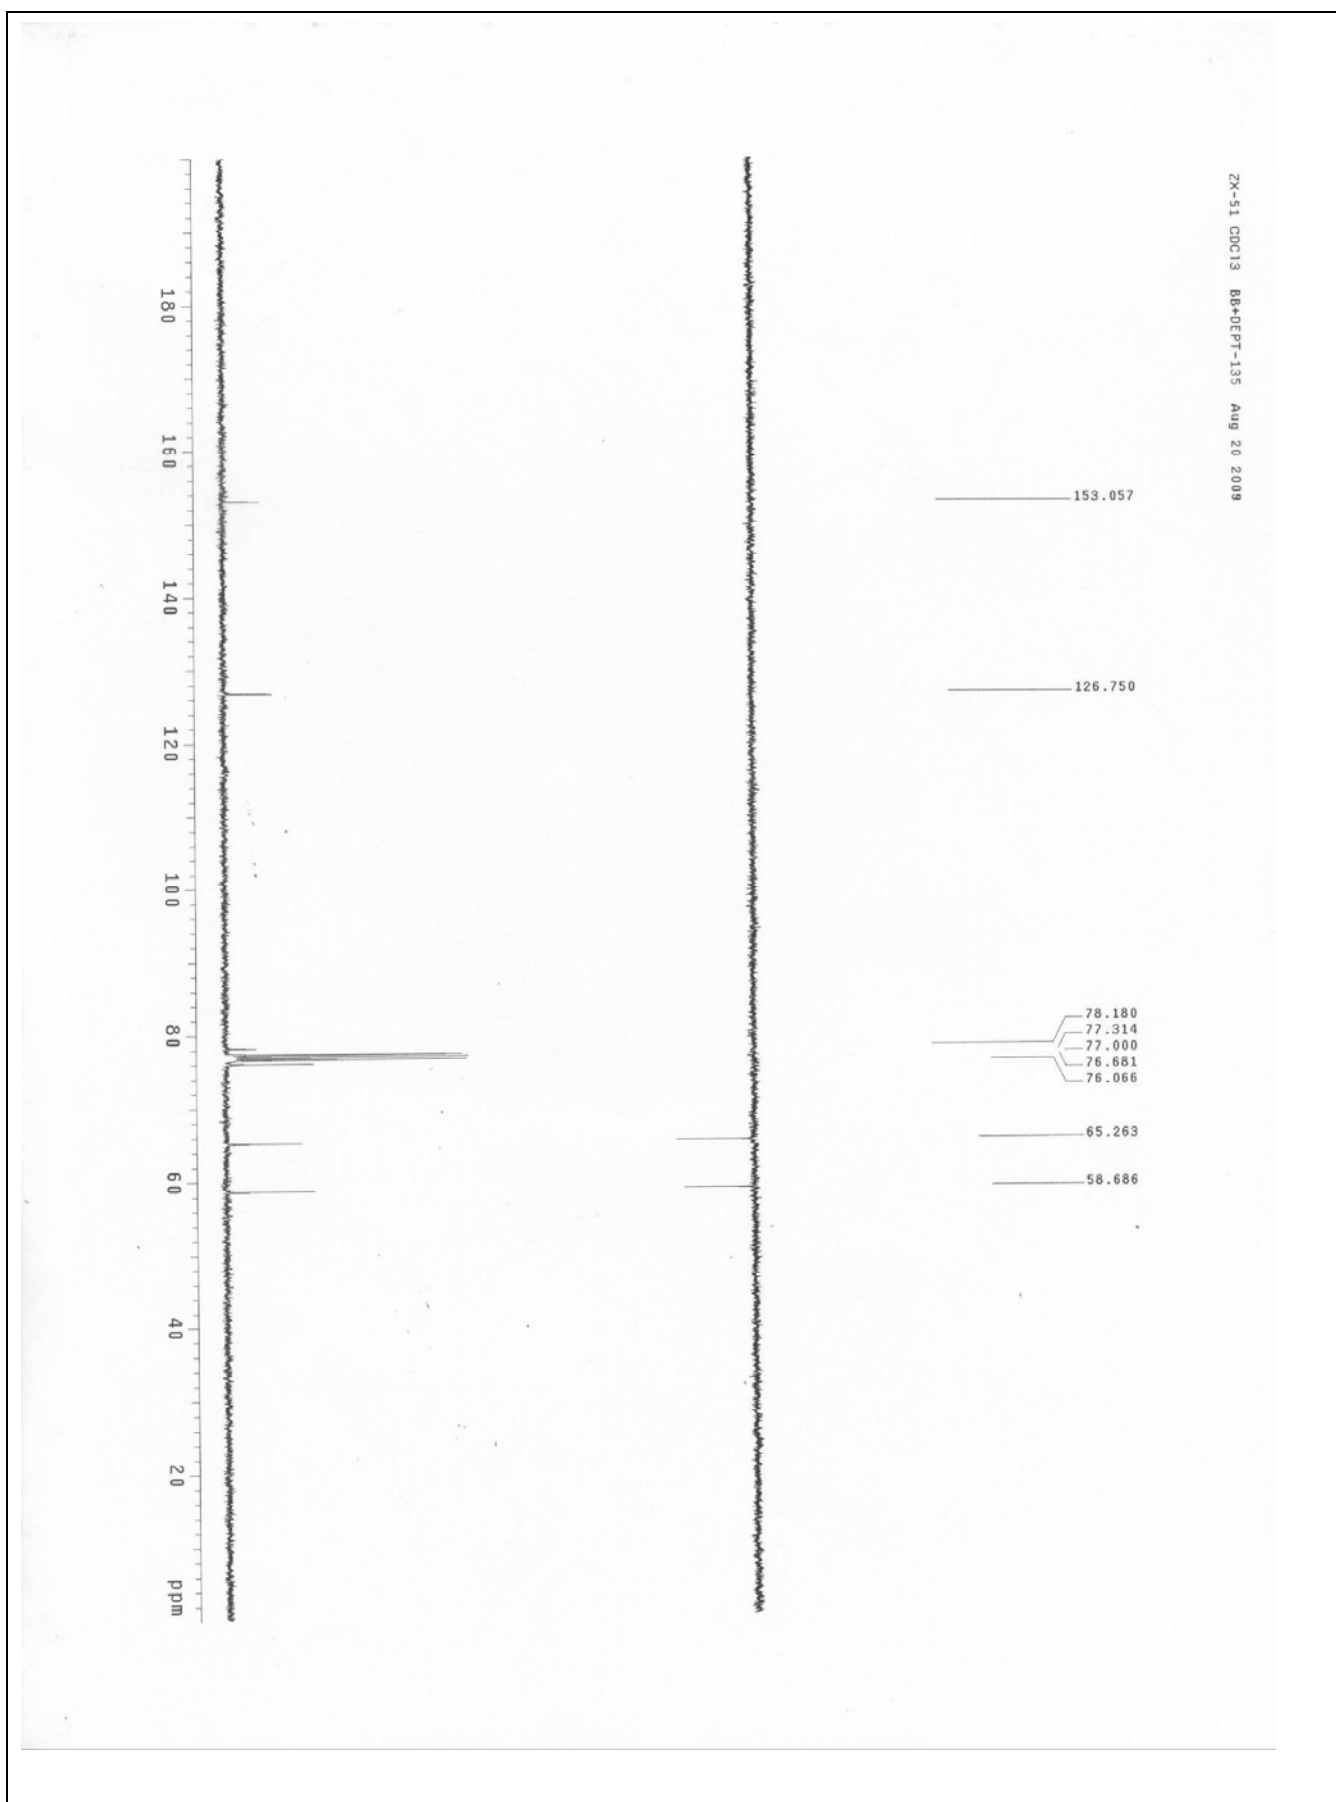

# 2-((But-2-ynyloxy)methyl)-1*H*-benzo[d]imidazole (A20)

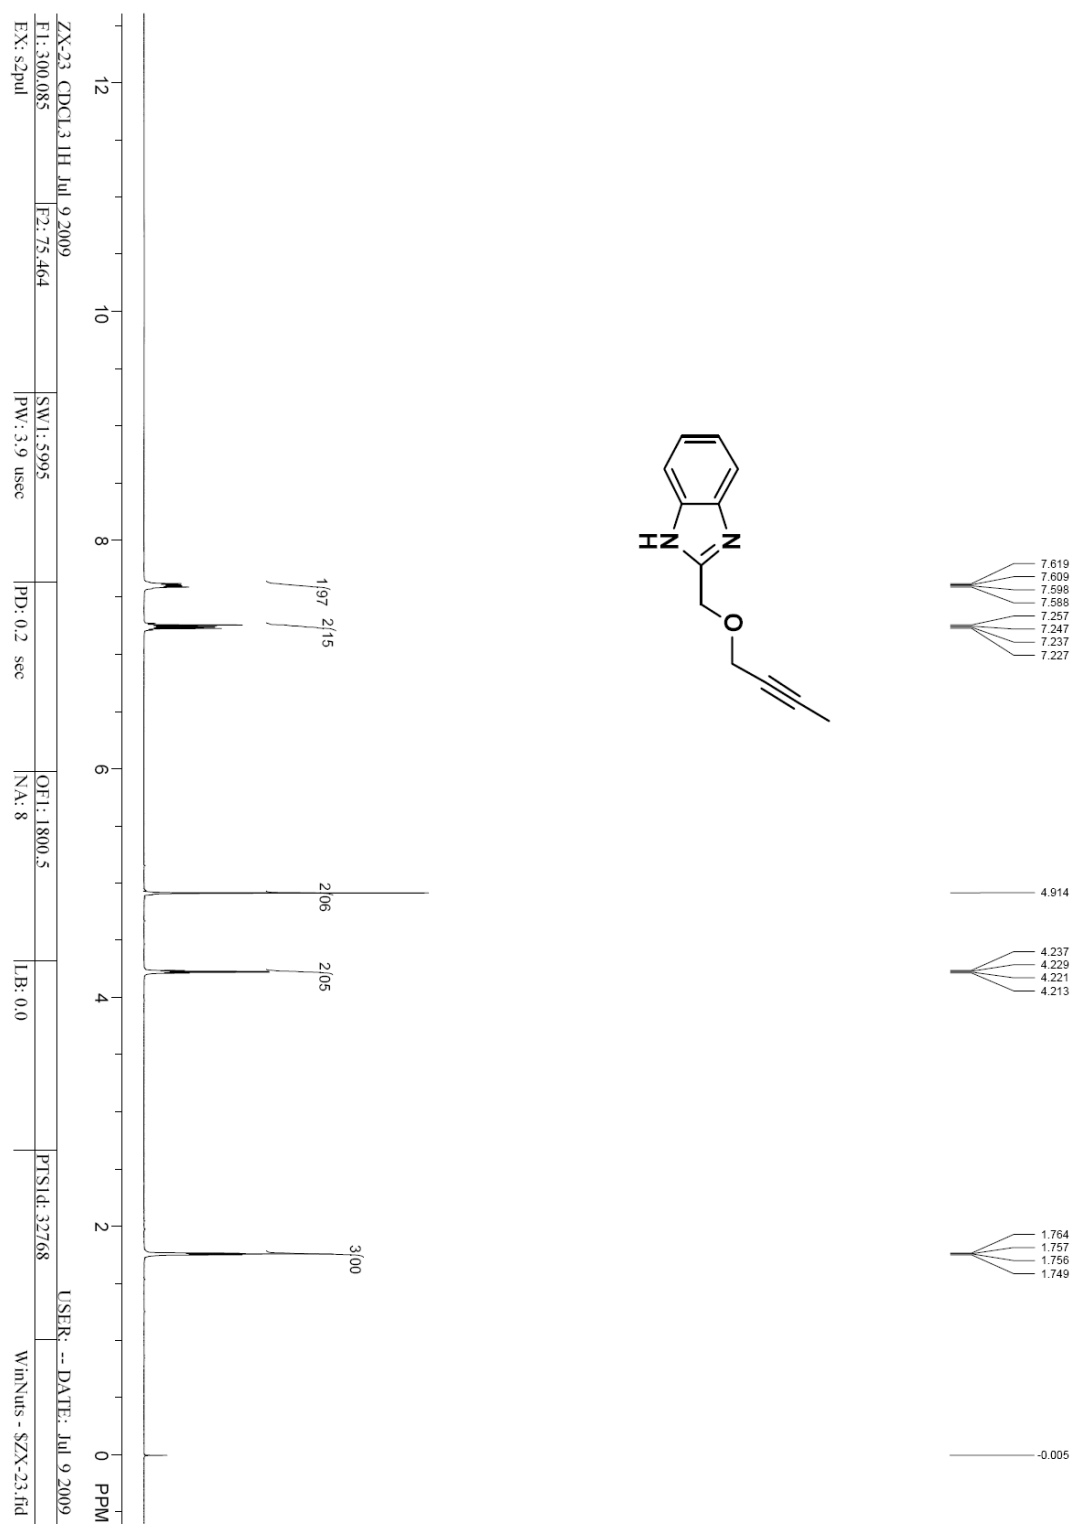

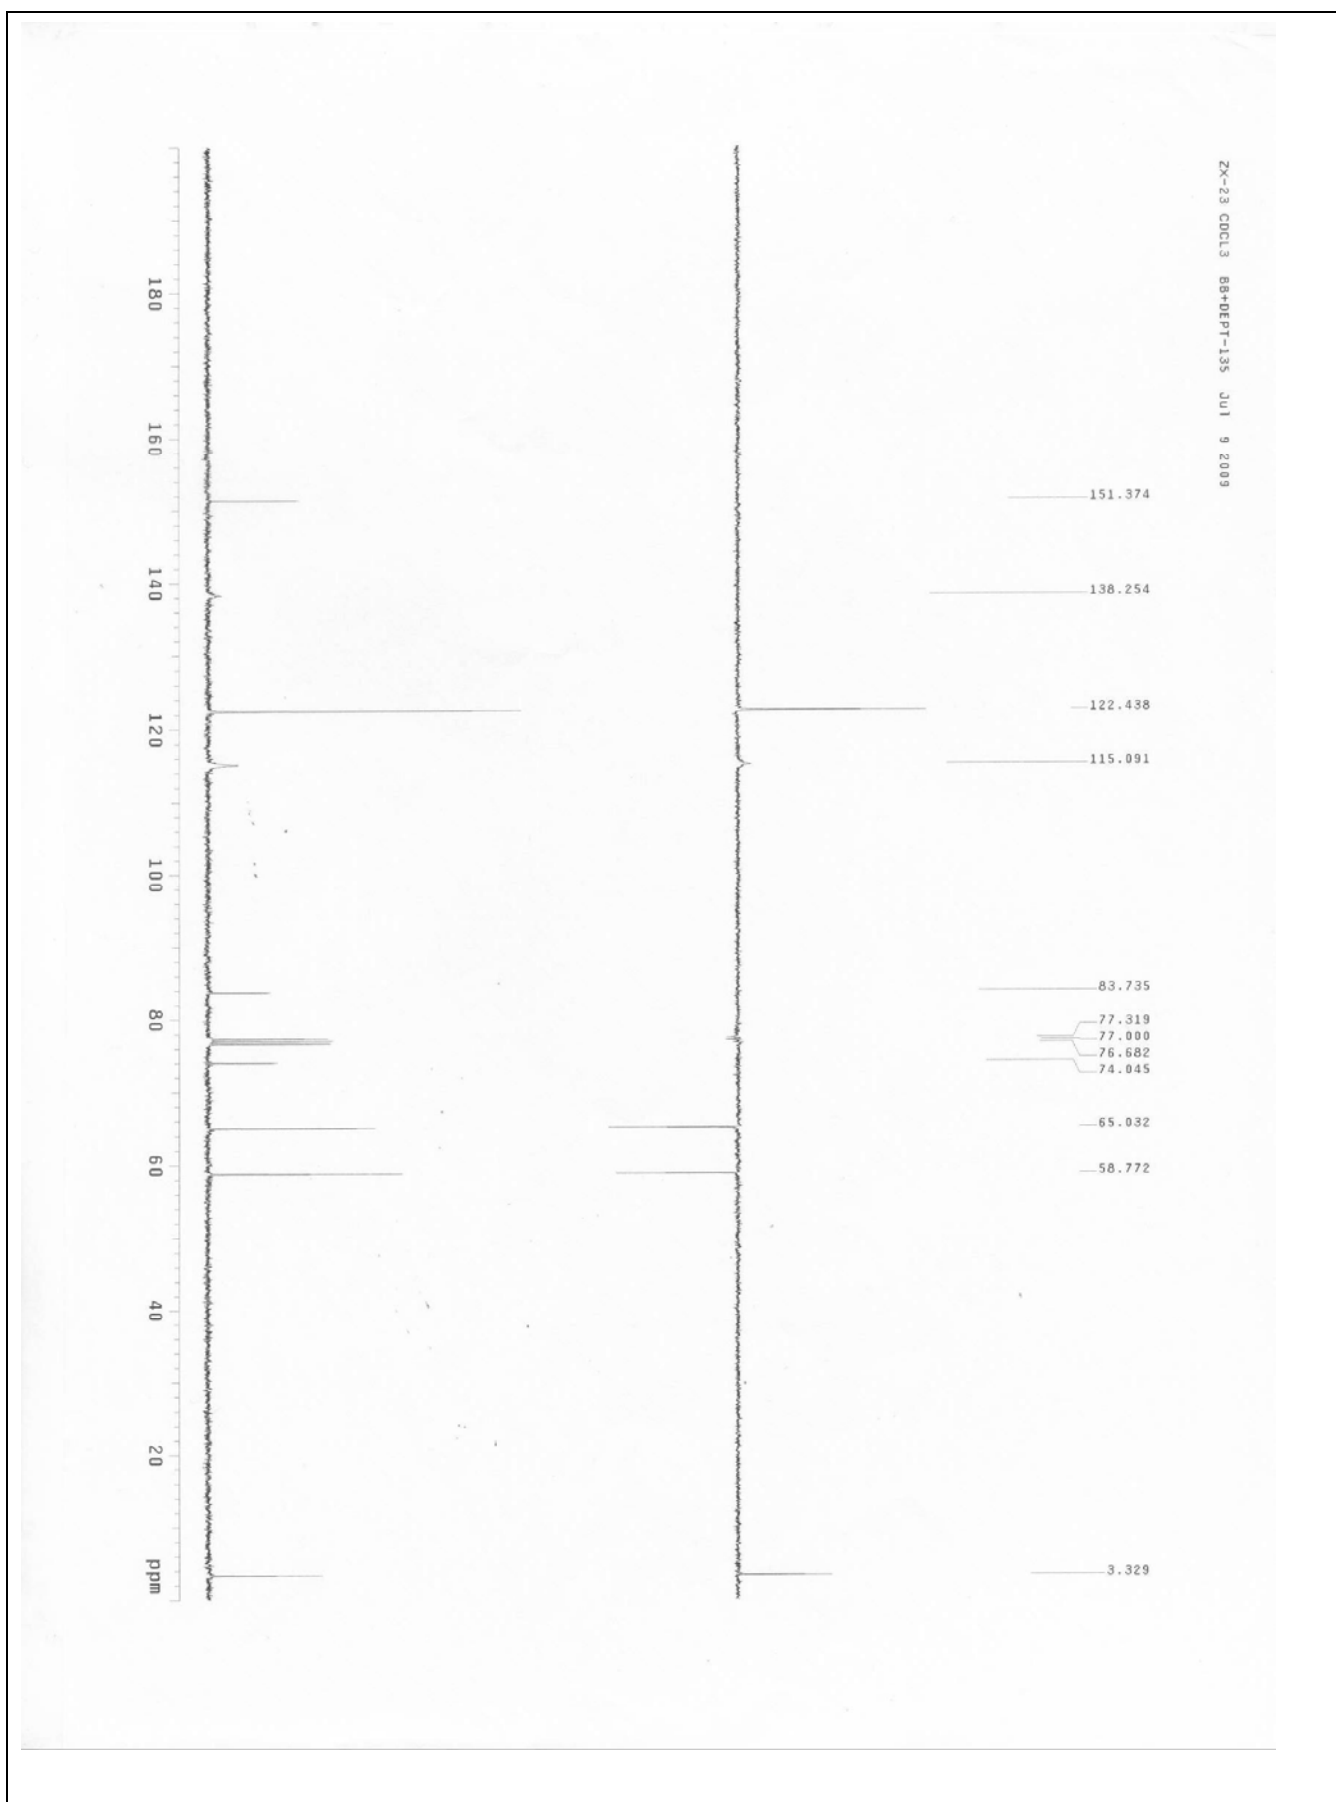



## 2-((But-2-ynoxy)methyl)-5,6-dimethyl-1H-benzo[d]imidazole (A21)

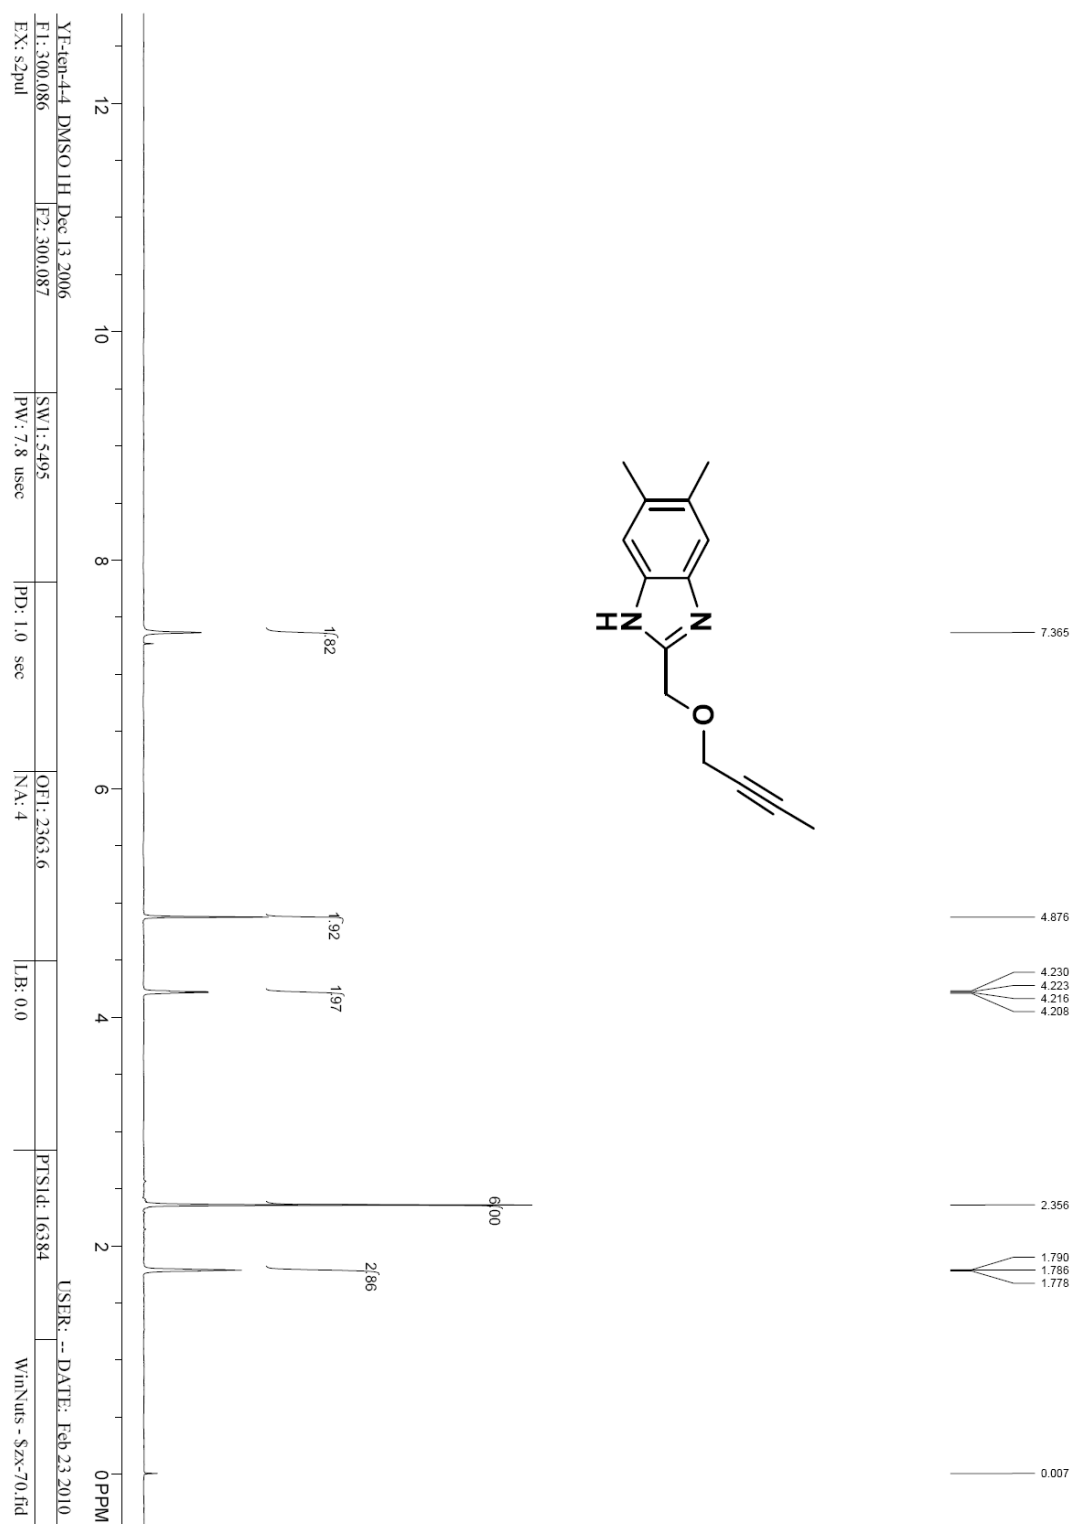

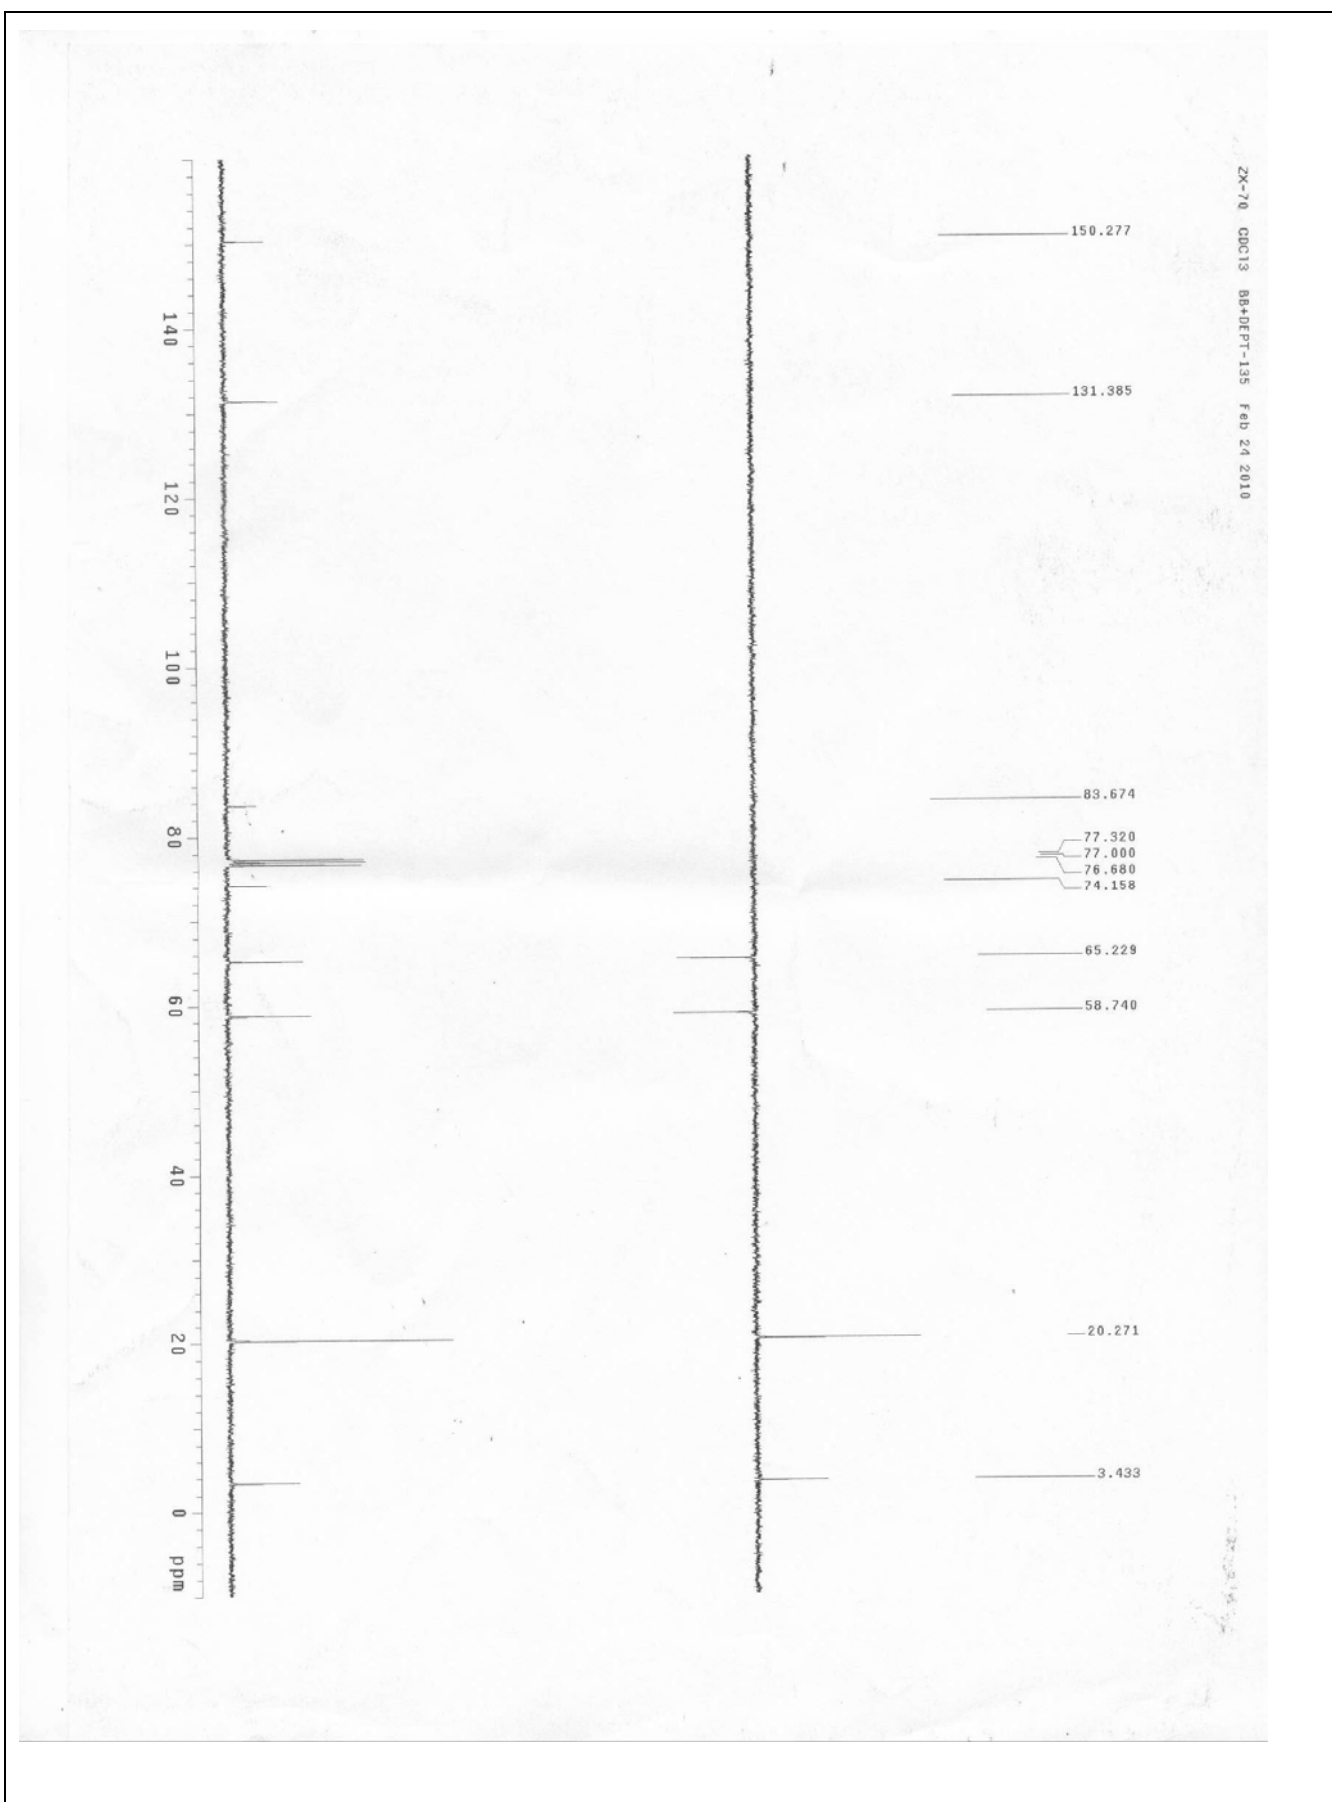

**2-((But-2-ynyloxy)methyl)-5,6-dichloro-1*H*-benzo[*d*]imidazole (A22)**

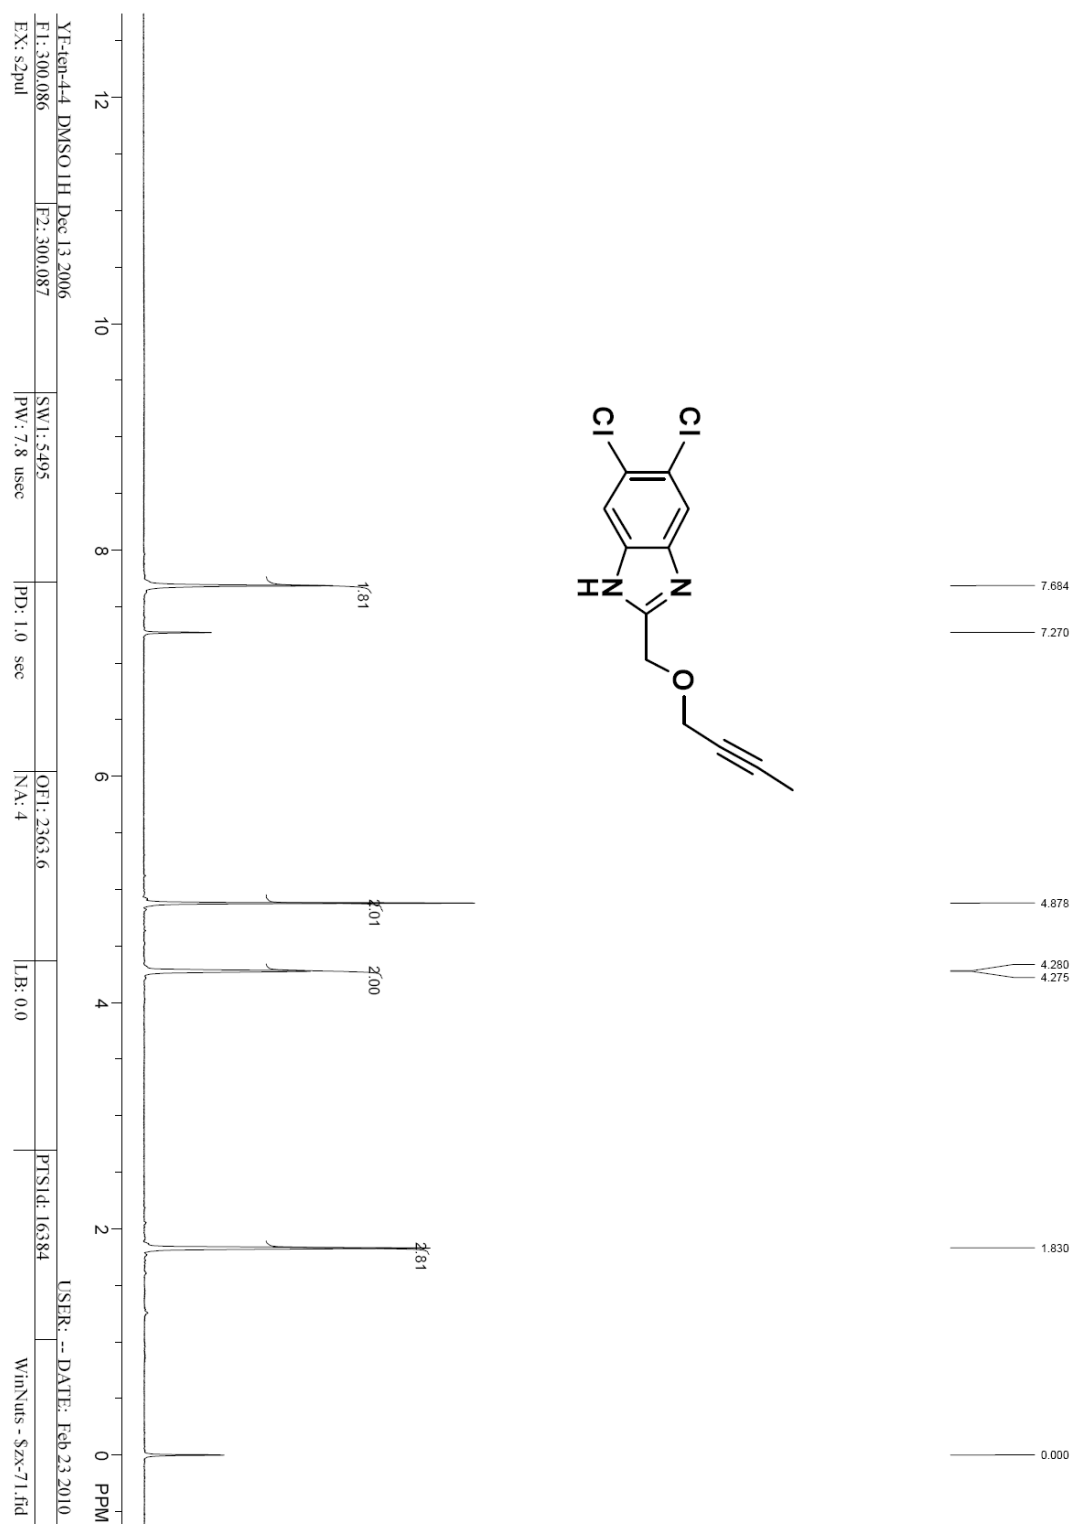

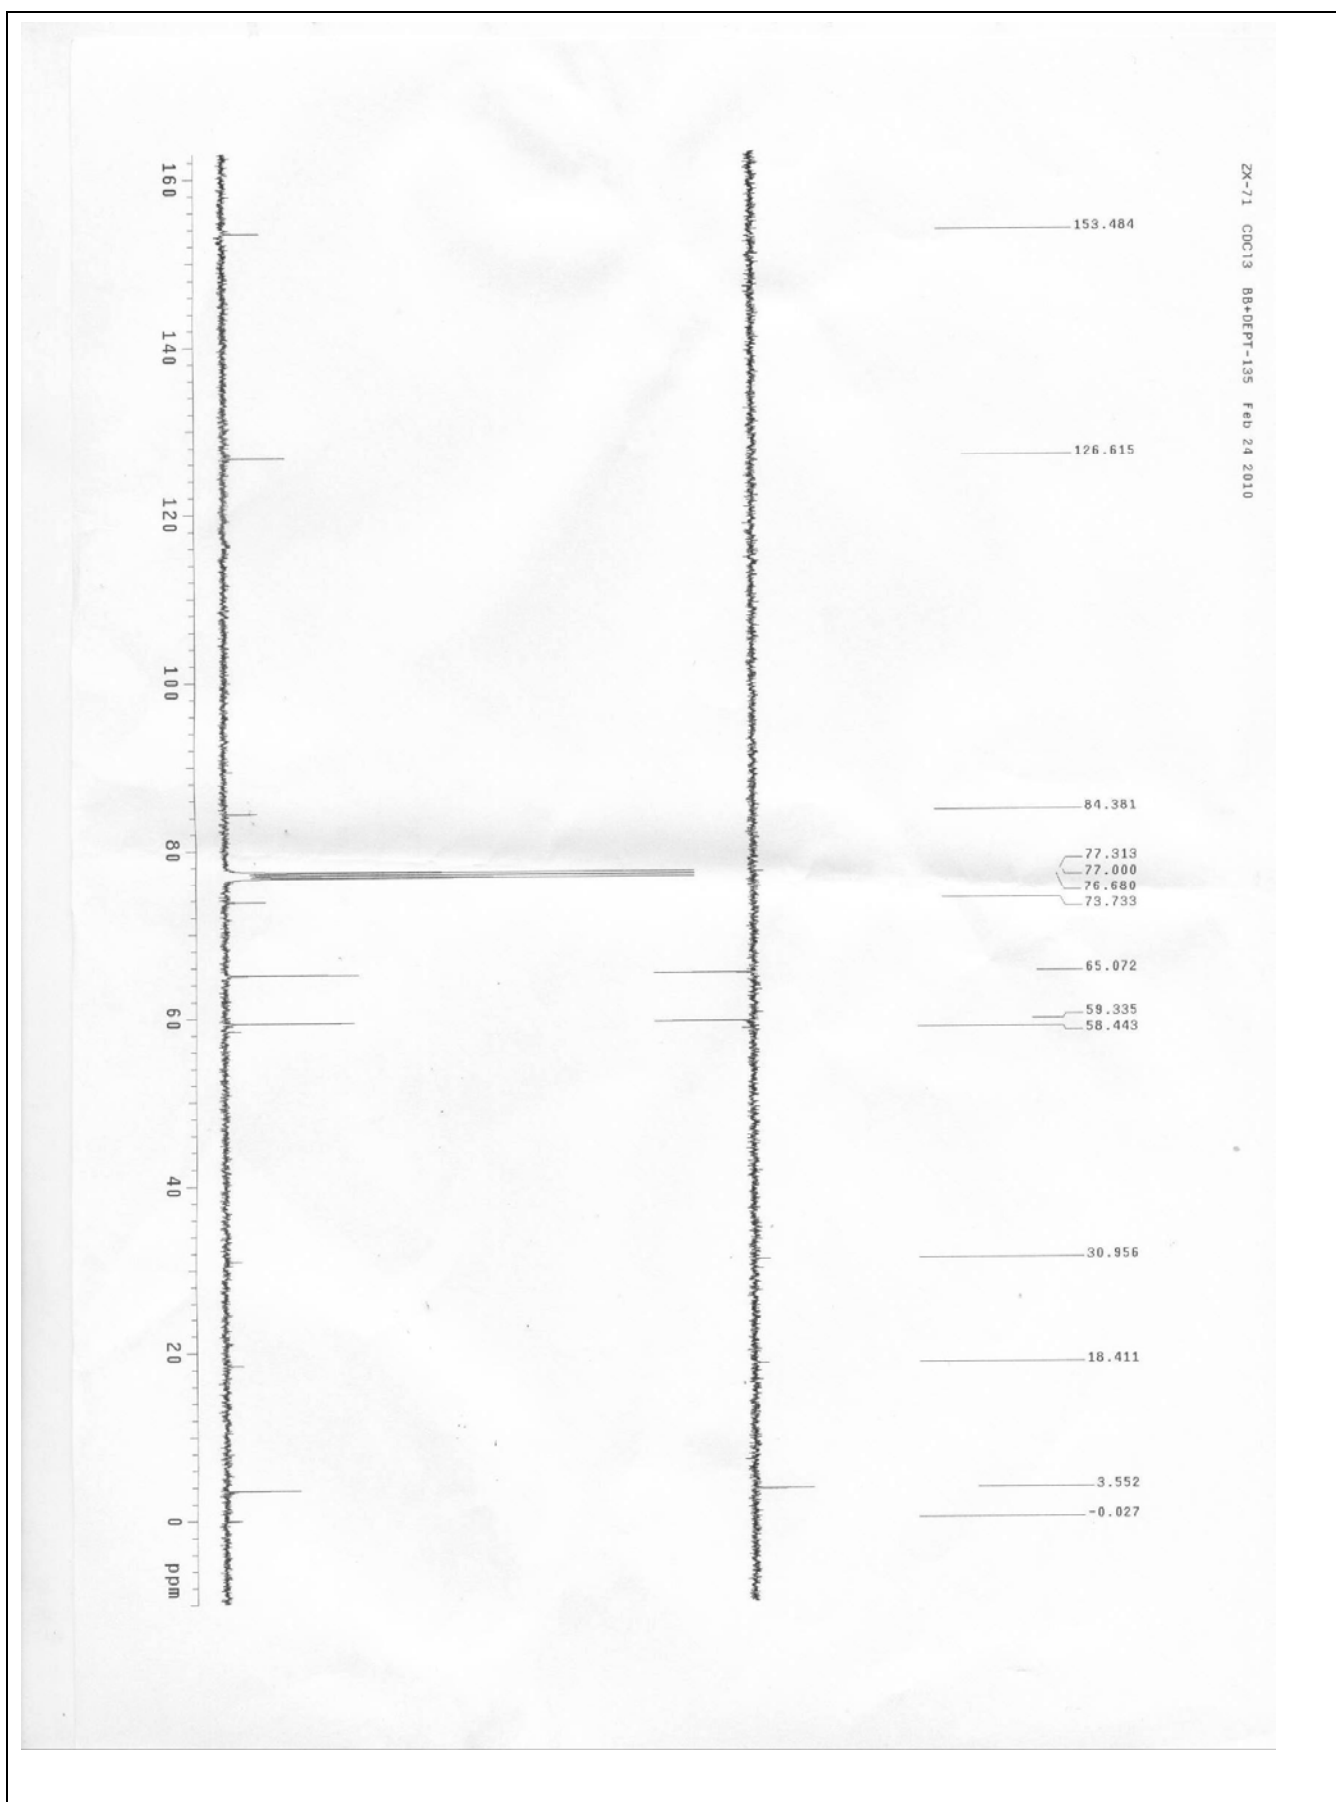

## 2-((3-Phenylprop-2-ynyloxy)methyl)-1H-benzo[d]imidazole (A23)

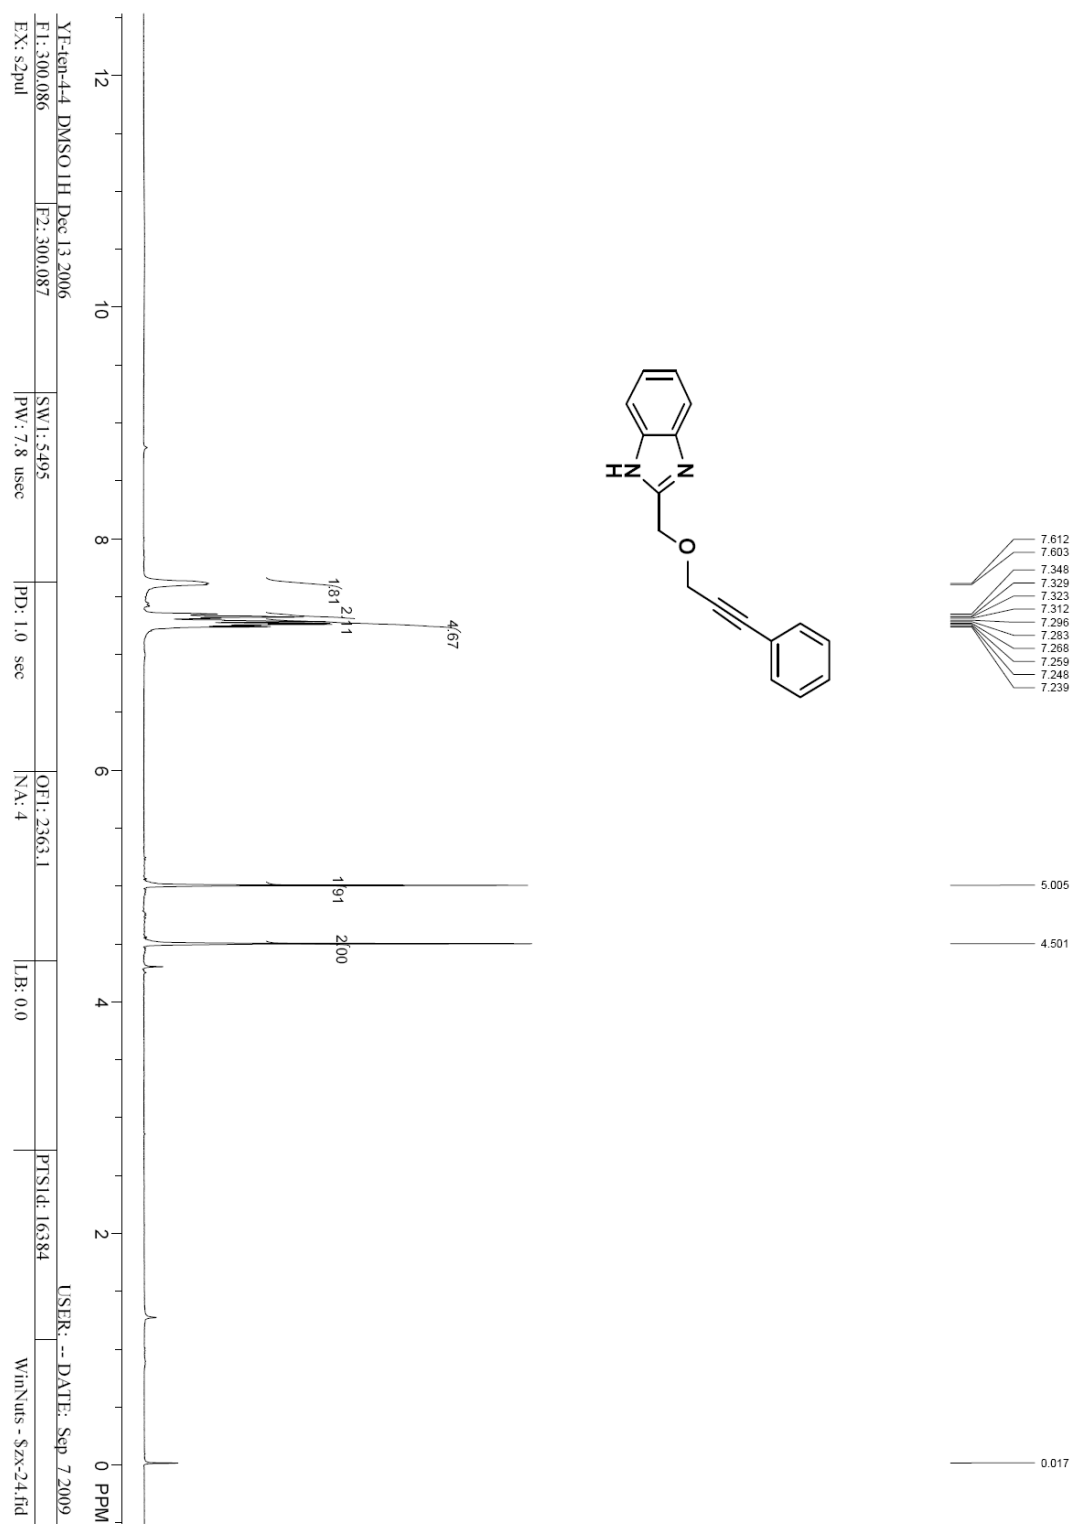

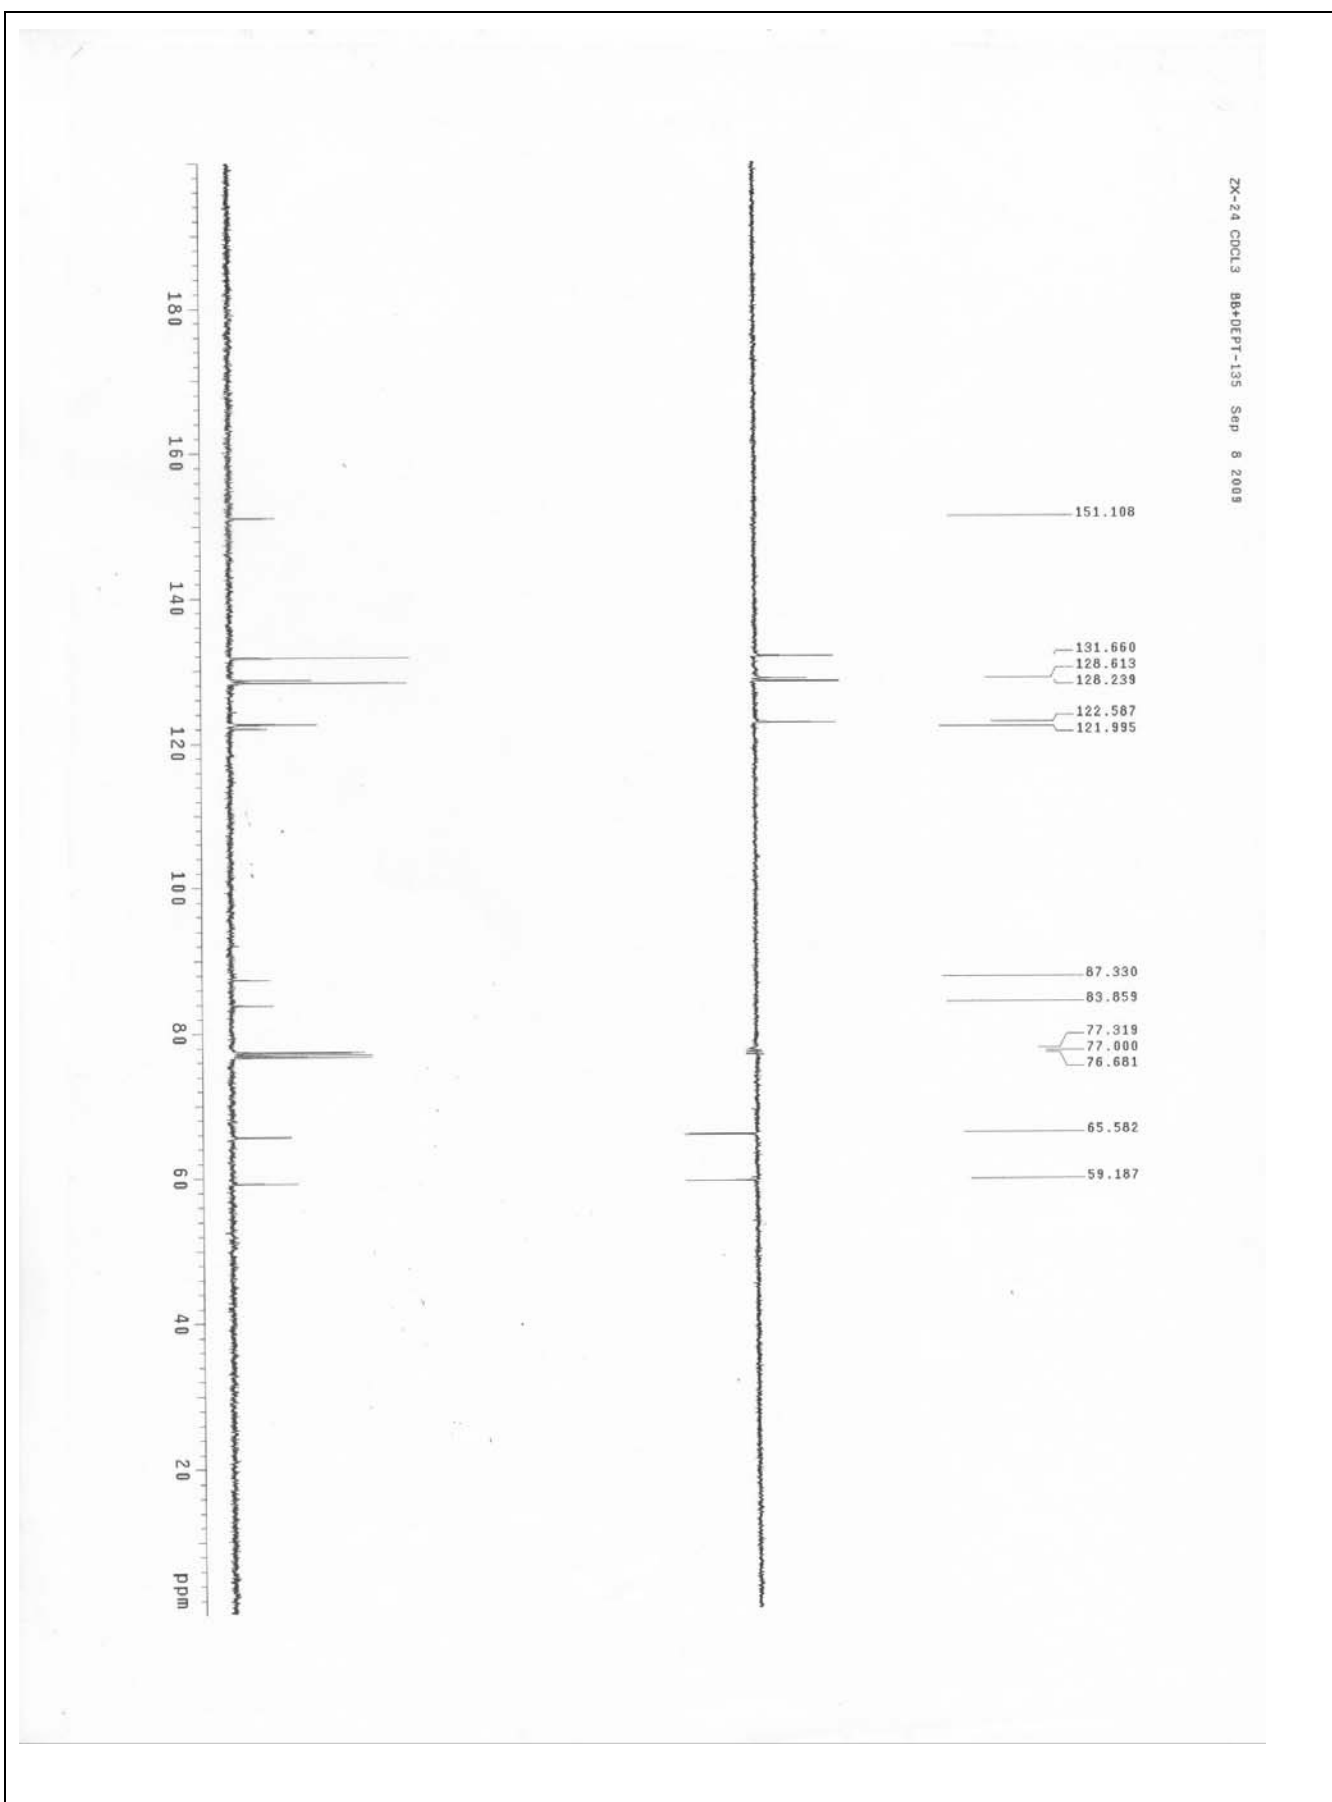

**2-((3-(2-(Trifluoromethyl)phenyl)prop-2-ynyloxy)methyl)-1H-benzo[d]imidazole (A24)**

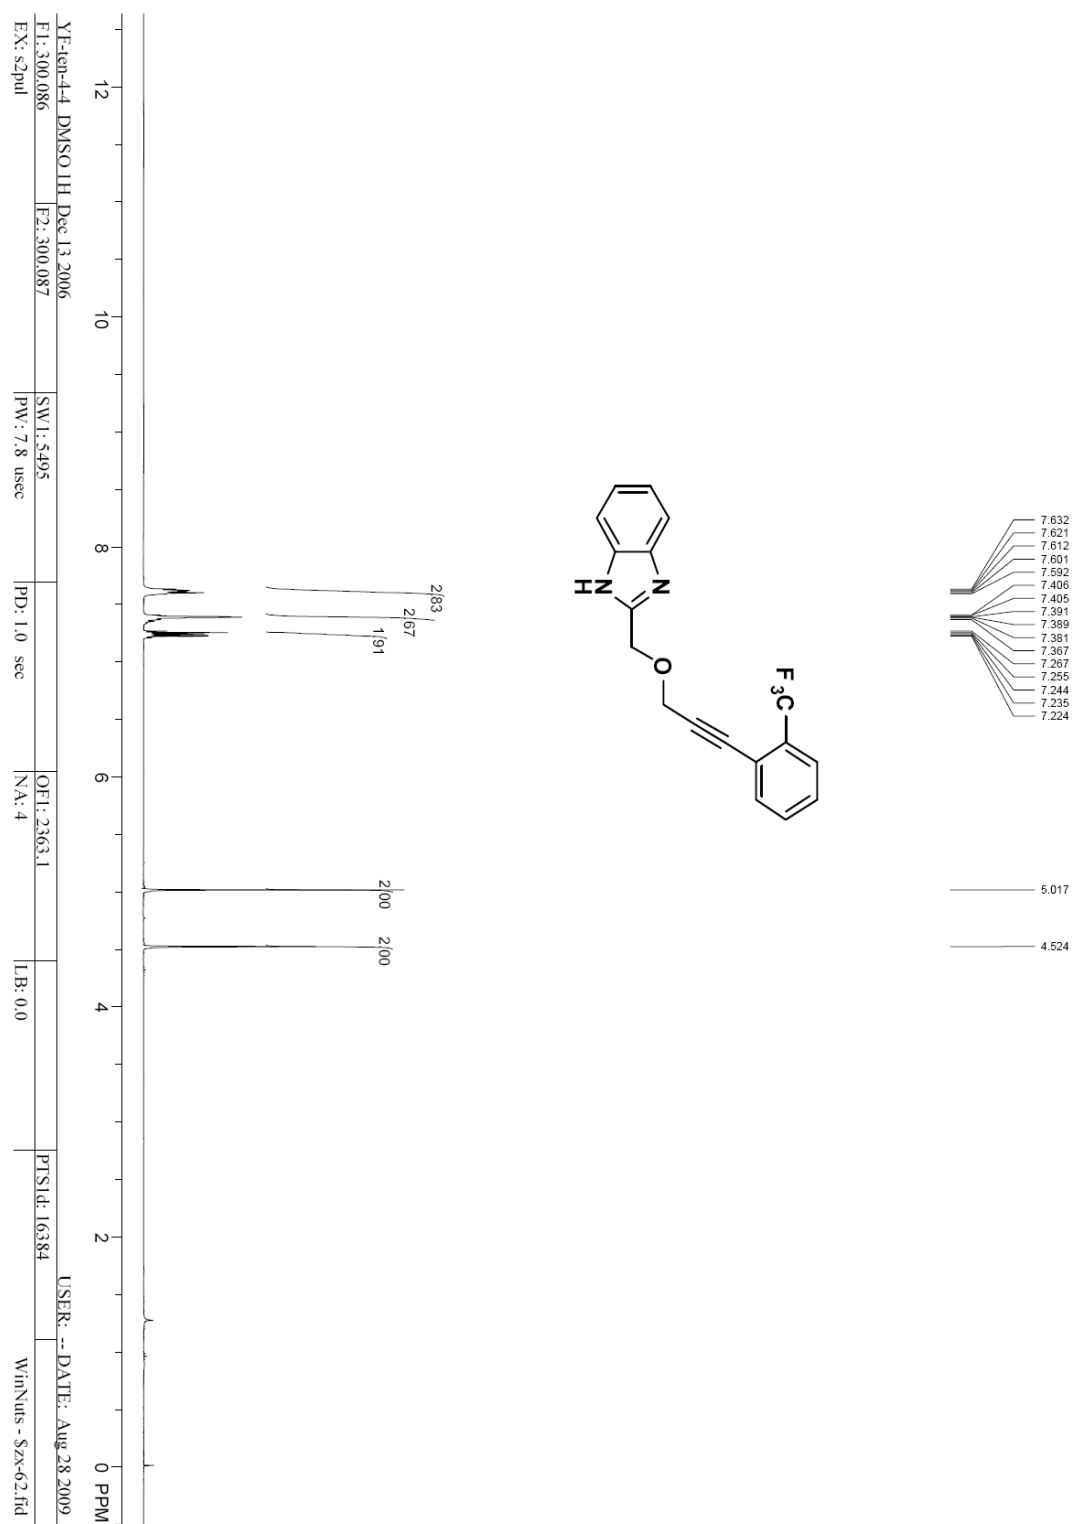

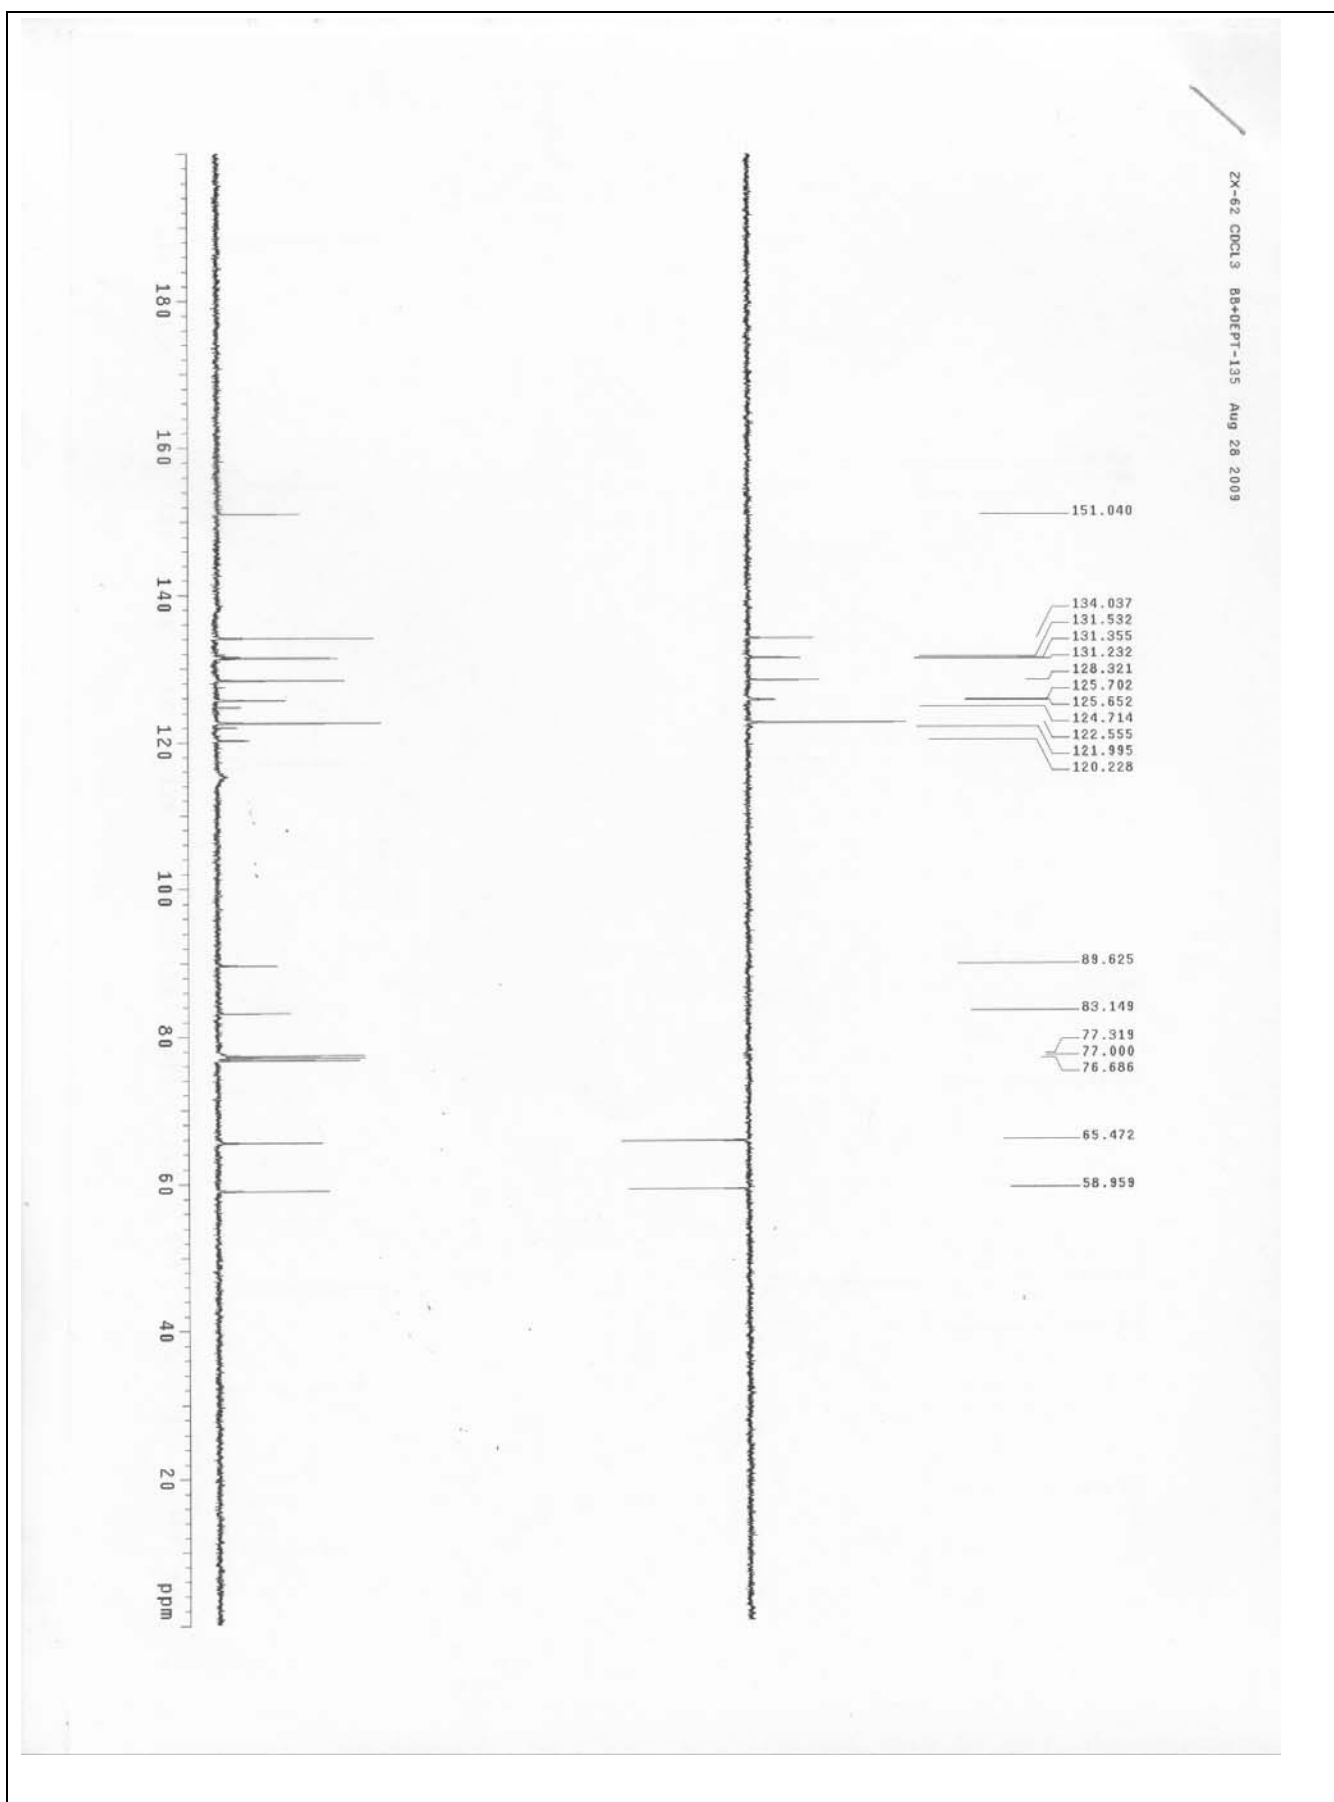



**2-((3-(4-(Trifluoromethyl)phenyl)prop-2-ynyloxy)methyl)-1H-benzo[d]imidazole (A25)**

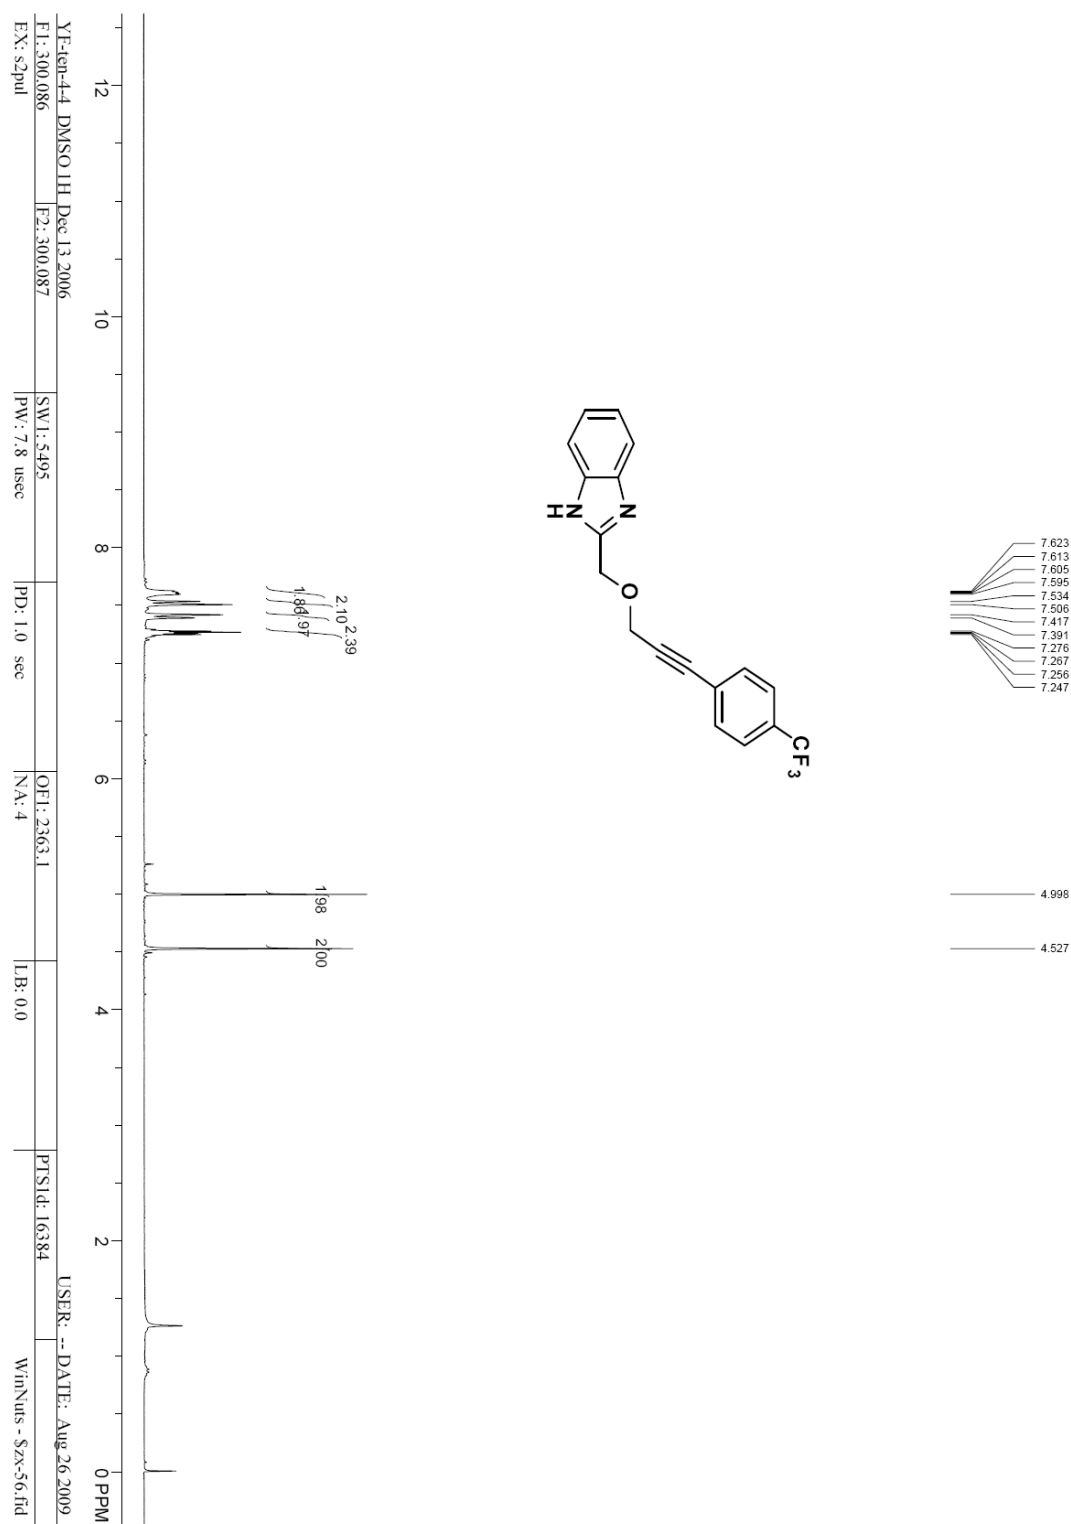

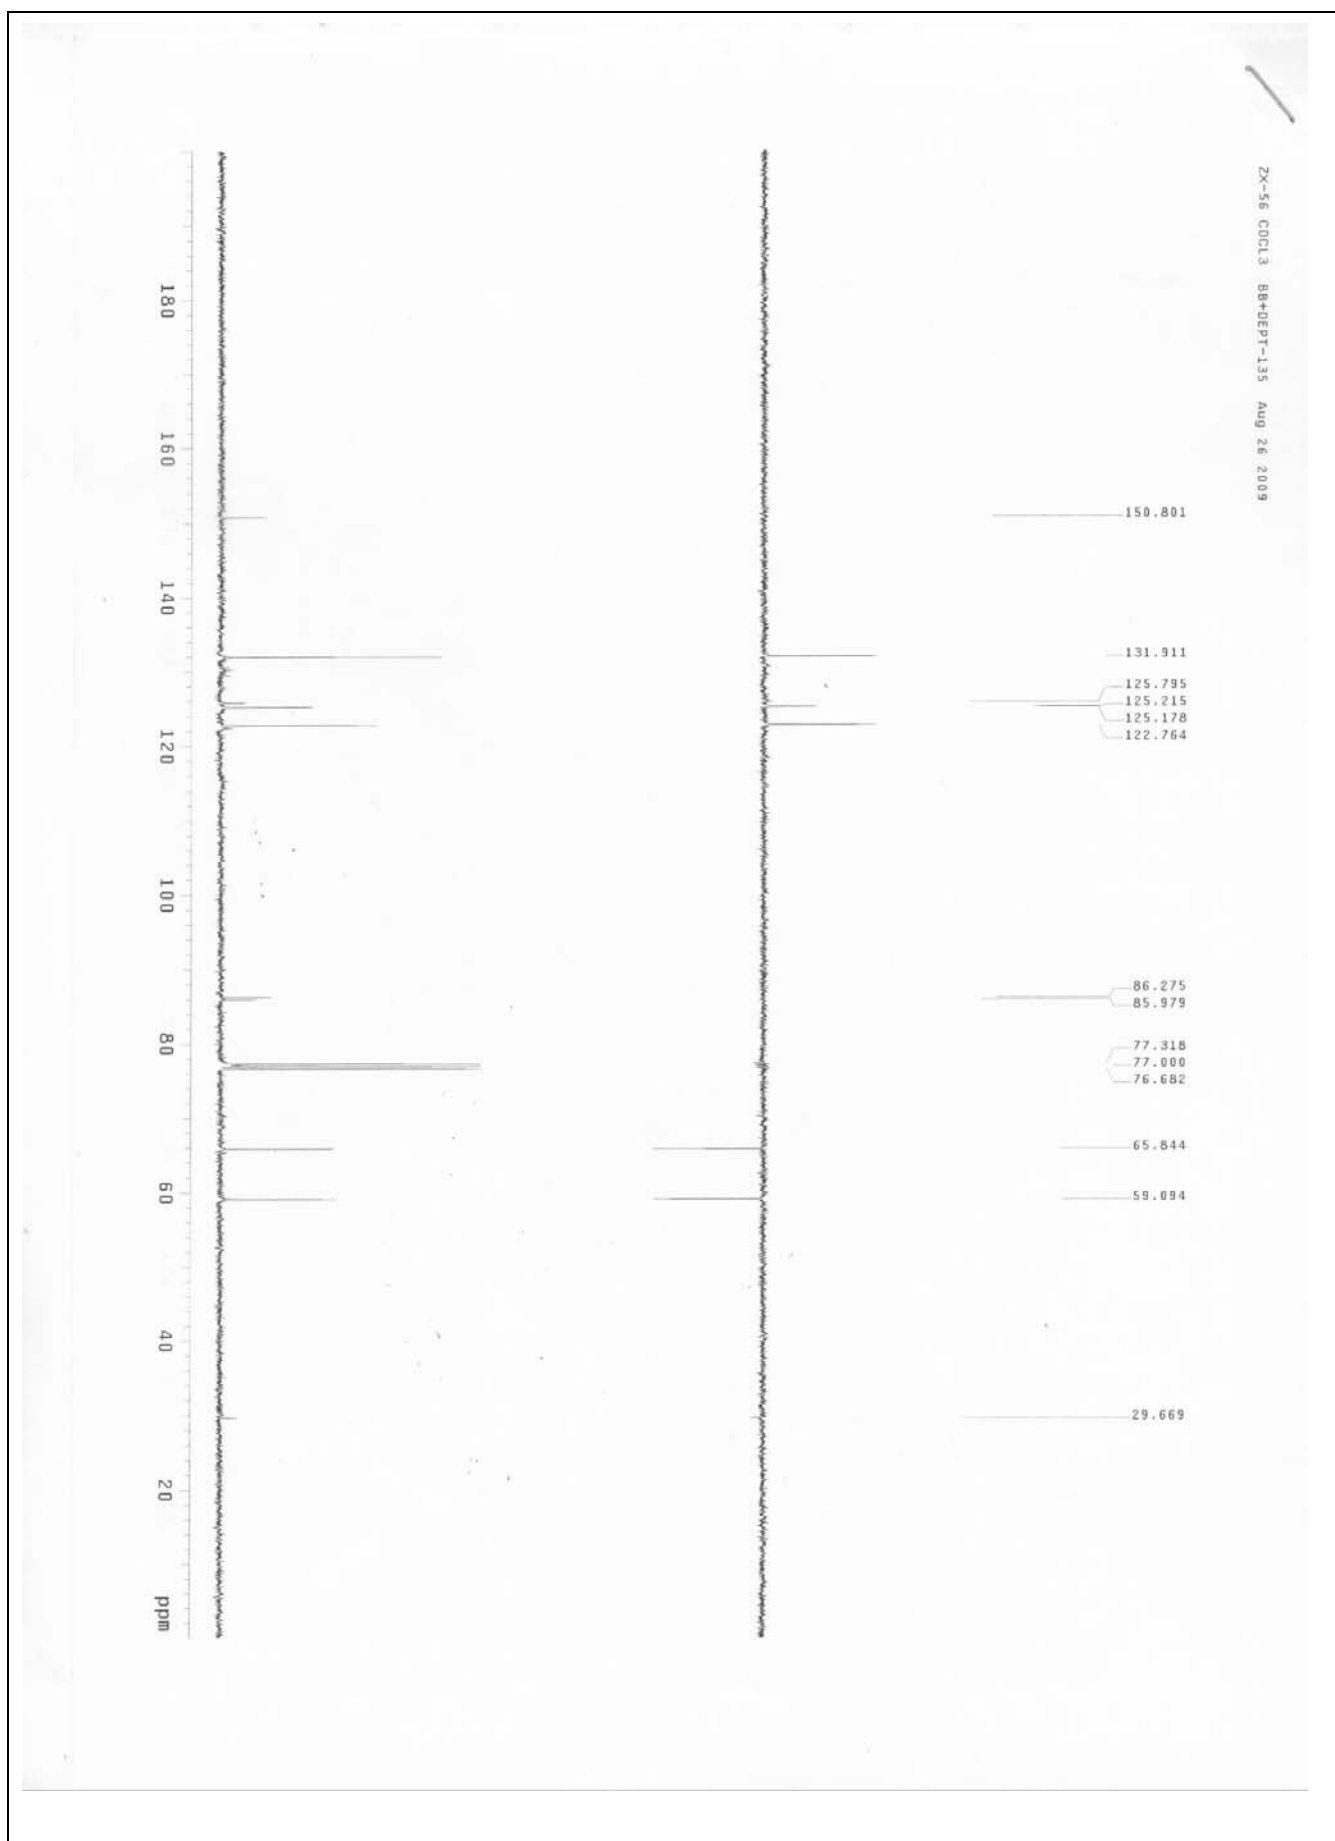

**2-((3-(4-Chlorophenyl)prop-2-ynyloxy)methyl)-1H-benzo[d]imidazole (A26)**

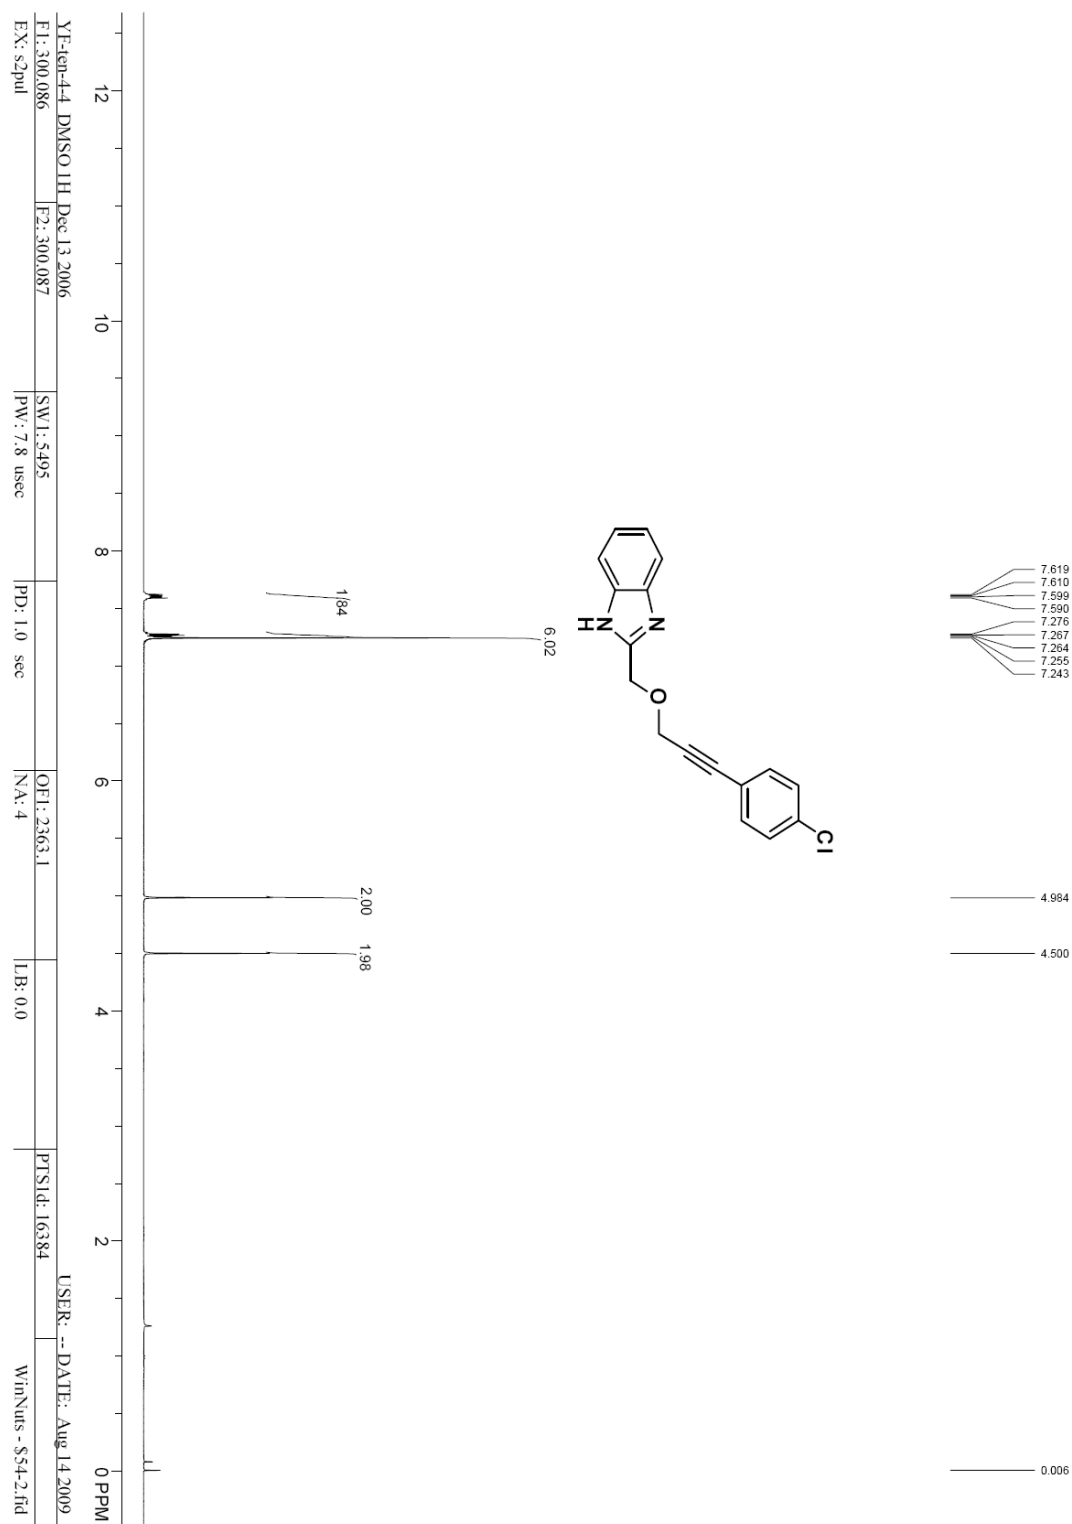

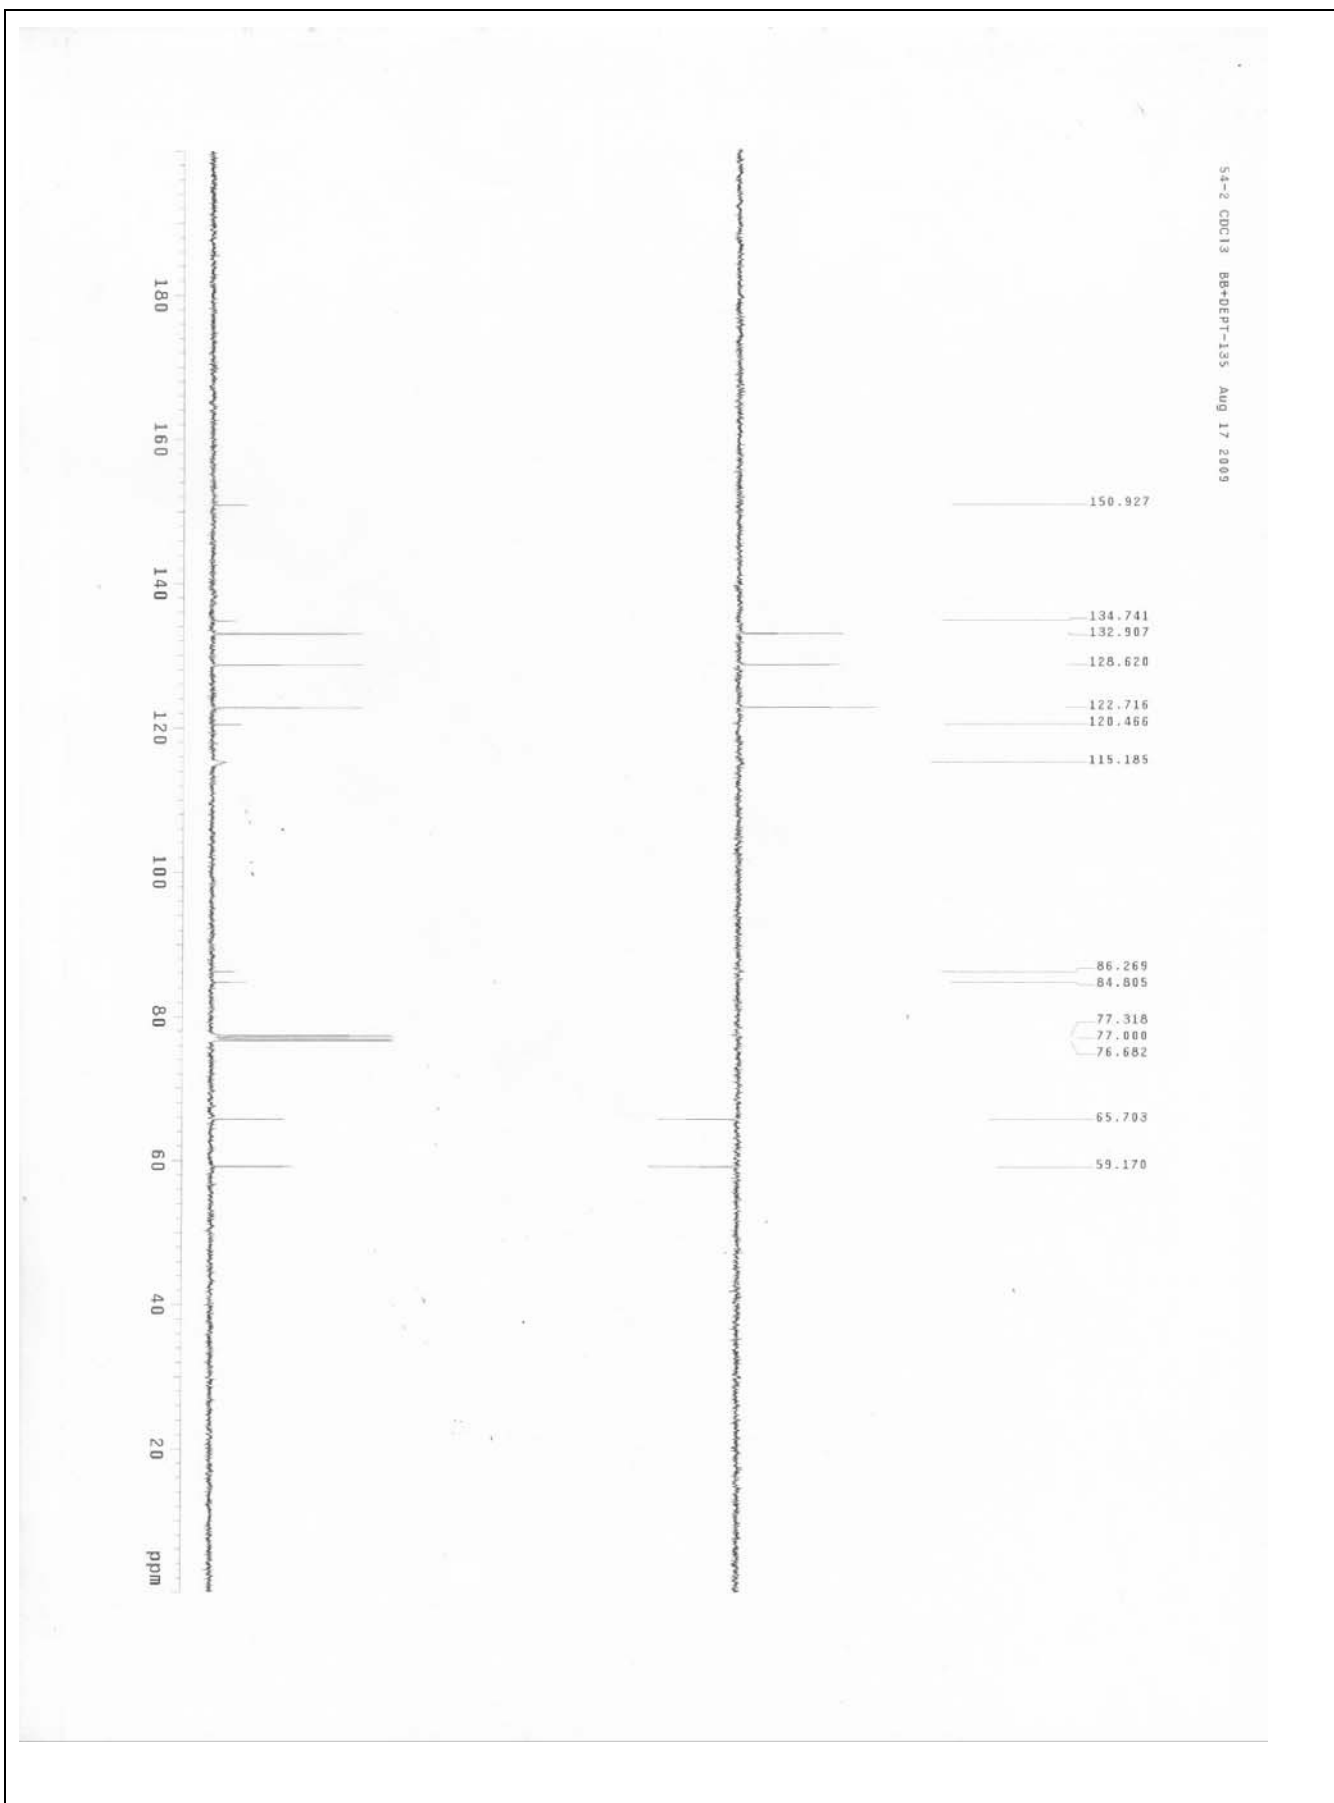

## 2-((Prop-2-ynyloxy)methyl)-1*H*-naphtho[2,3-*d*]imidazole (A27)

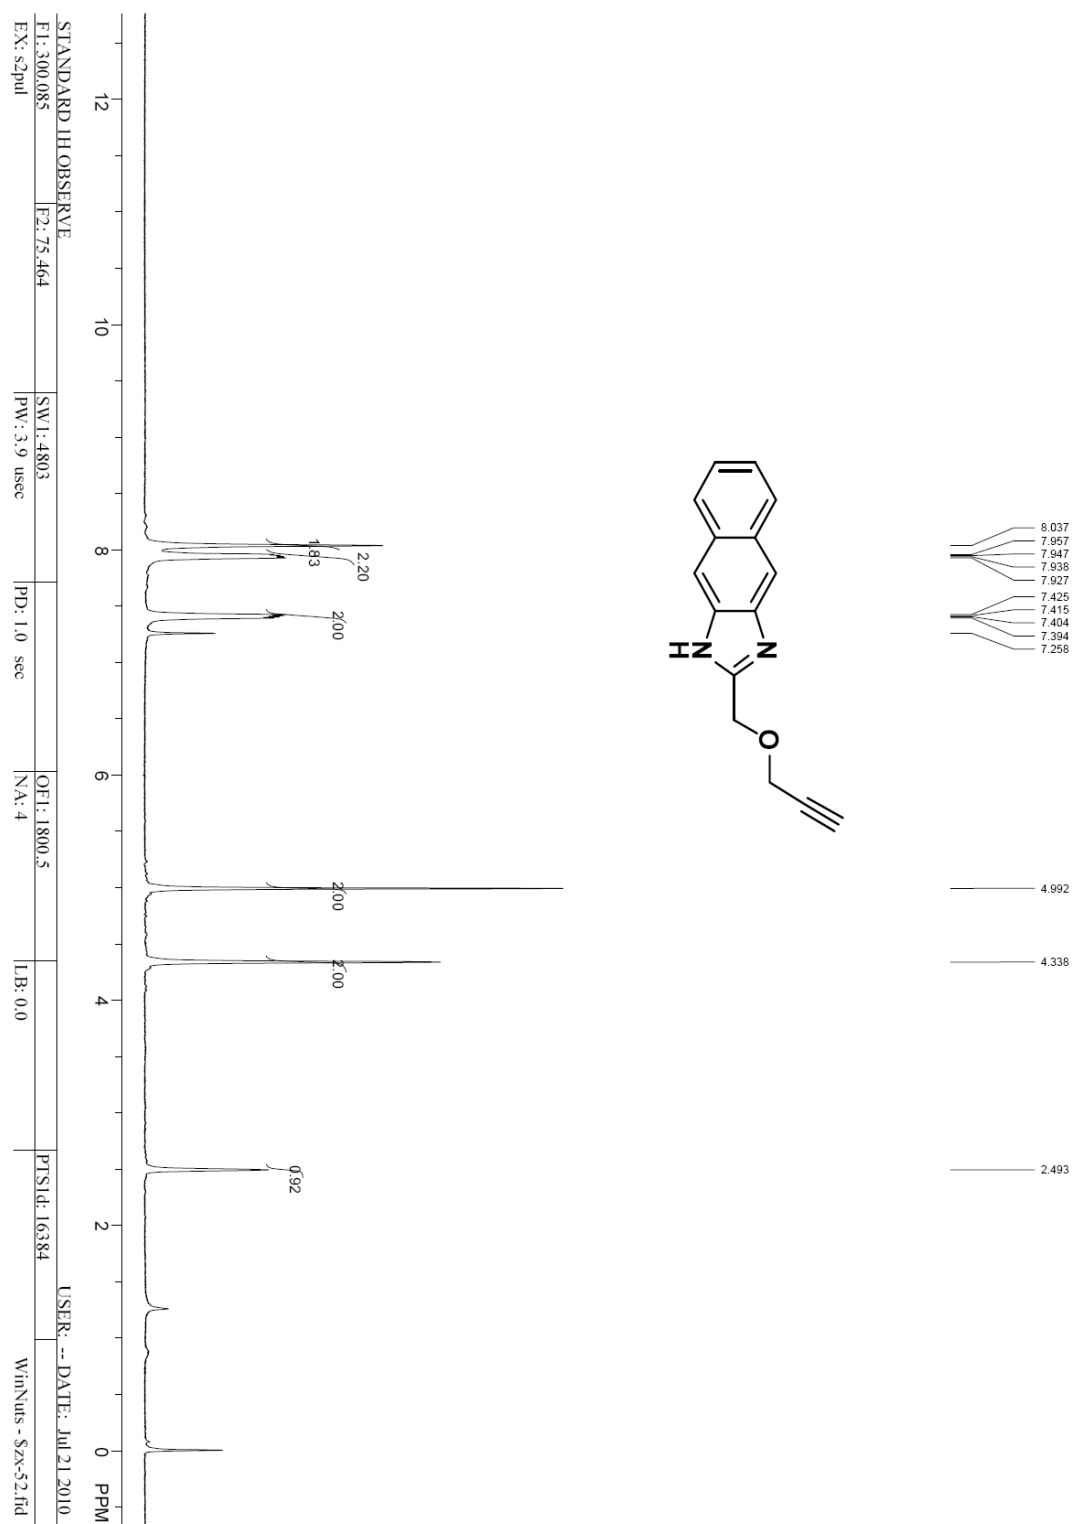

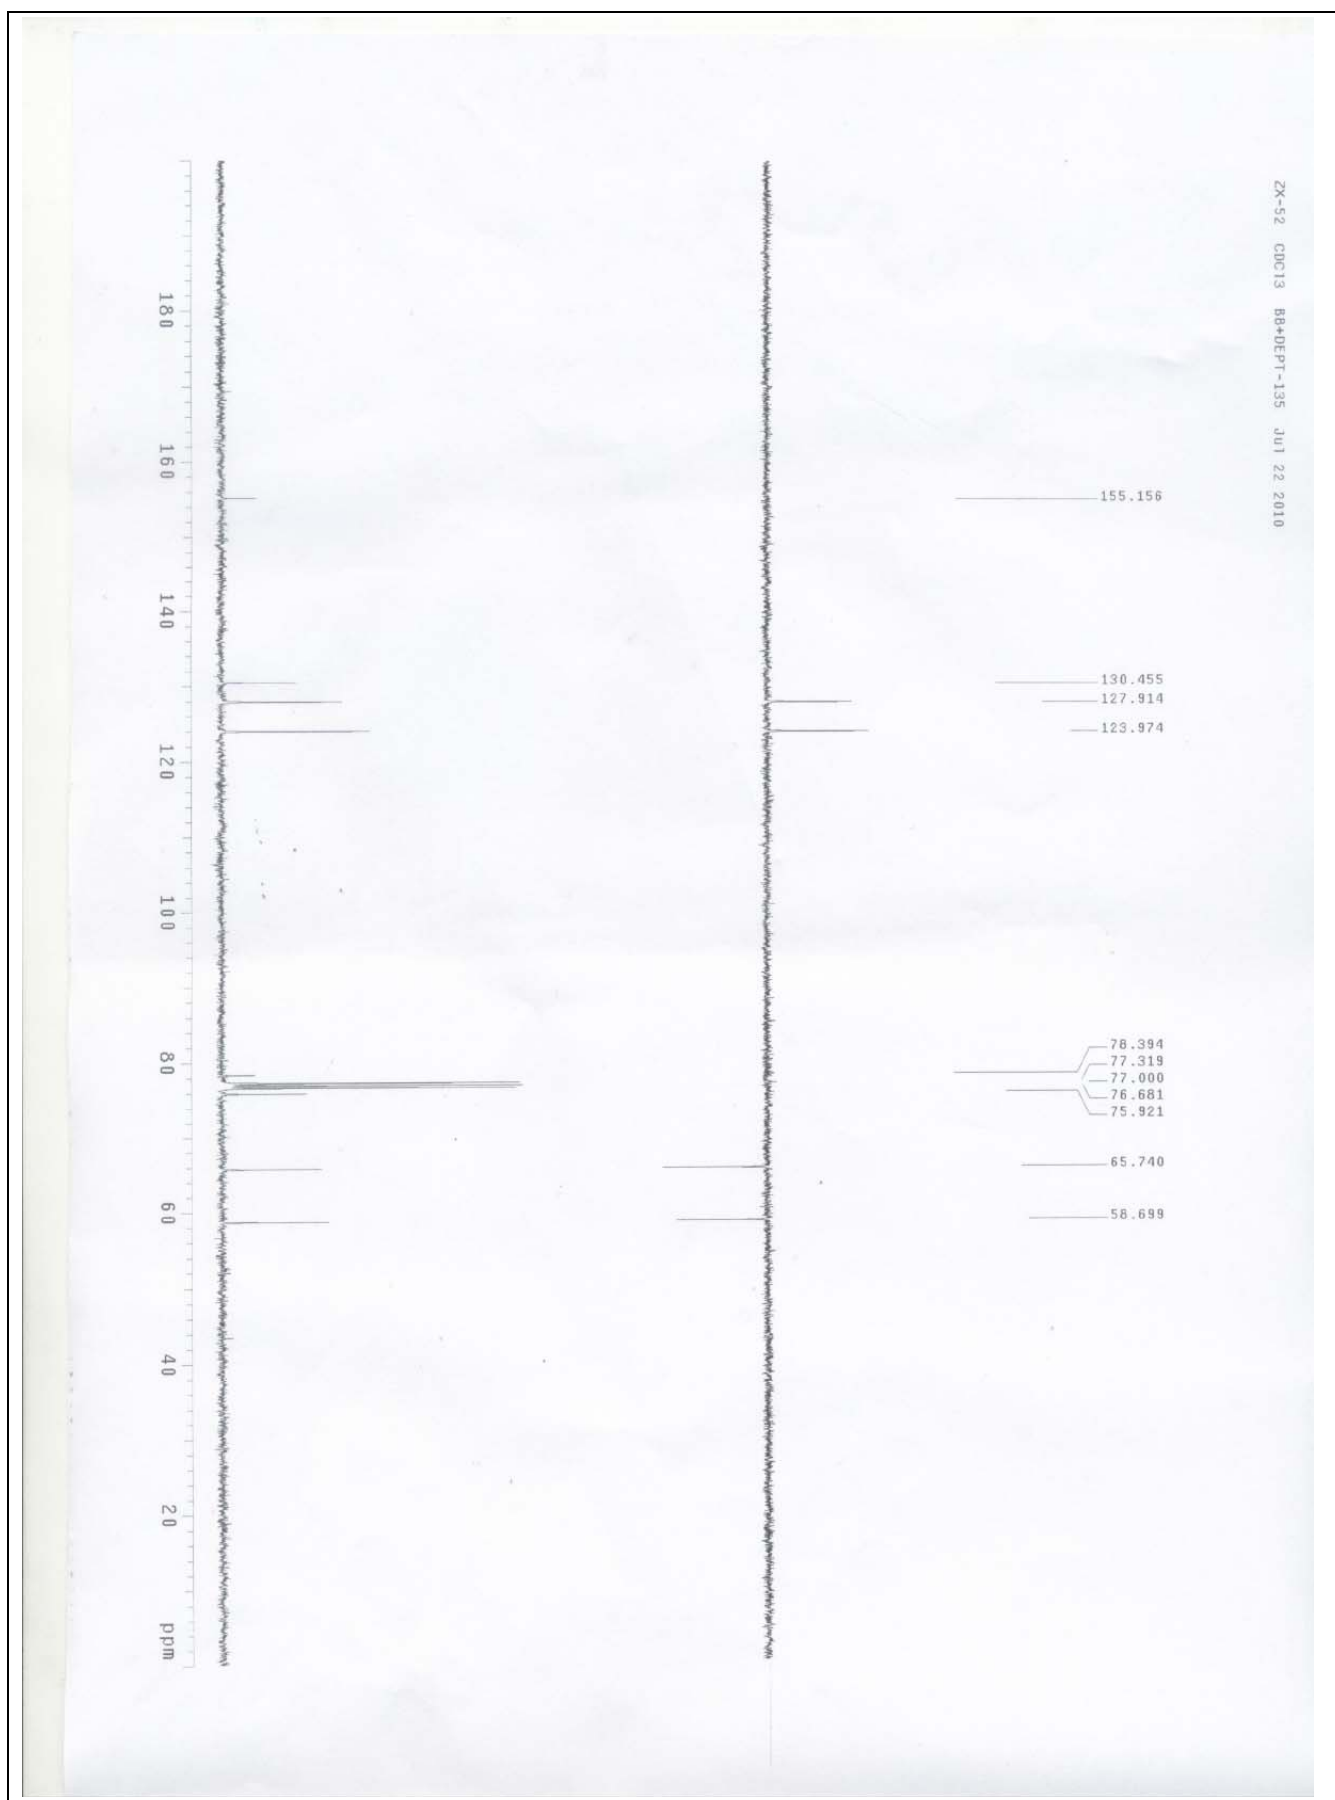

Supplement: c0gc00668h-1.pdf [file c0gc00668h-1.pdf]
