# Supplementary material for: Silver-catalyzed intramolecular hydroamination of alkynes in aqueous media: efficient and regioselective synthesis for fused benzimidazoles
Source: Royal Society of Chemistry journal article supplement (doi:10.1039/c0gc00668h), 2010-12-23

*Supporting Information for*

**Silver-catalyzed intramolecular hydroamination of alkynes in aqueous media: efficient and regioselective synthesis for fused benzimidazoles**

Xu Zhang,<sup>a, b</sup> Yu Zhou,<sup>b</sup> Hengshuai Wang,<sup>b</sup> Diliang Guo,<sup>a, b</sup> Deju Ye,<sup>b</sup> Yungen Xu,<sup>a</sup>  
Hualiang Jiang,<sup>b</sup> and Hong Liu<sup>a, b\*</sup>

<sup>a</sup> *Department of Medicinal Chemistry, China Pharmaceutical University, 24 Tong jia Xiang, Nanjing, 210009, P. R. China*

<sup>b</sup> *State Key Laboratory of Drug Research, Shanghai Institute of Materia Medica, Chinese Academy of Sciences, Shanghai, 201203, China*

Email: [hliu@mail.shcnc.ac.cn](mailto:hliu@mail.shcnc.ac.cn).

# Contents

|                                                                                                          |            |
|----------------------------------------------------------------------------------------------------------|------------|
| <b>X-ray Crystallographic Structure of B11 and C17.....</b>                                              | <b>S3</b>  |
| <b>General Information .....</b>                                                                         | <b>S7</b>  |
| <b>General Procedure for Synthesis of B1-B27 (C27).....</b>                                              | <b>S7</b>  |
| <b>Labeling studies with deuterated solvents.....</b>                                                    | <b>S8</b>  |
| <b>Labeling studies with deuterated starting materials.....</b>                                          | <b>S10</b> |
| <b>Copies of <math>^1\text{H}</math> NMR and <math>^{13}\text{C}</math> NMR of B1-[<i>d</i>]C23.....</b> | <b>S11</b> |

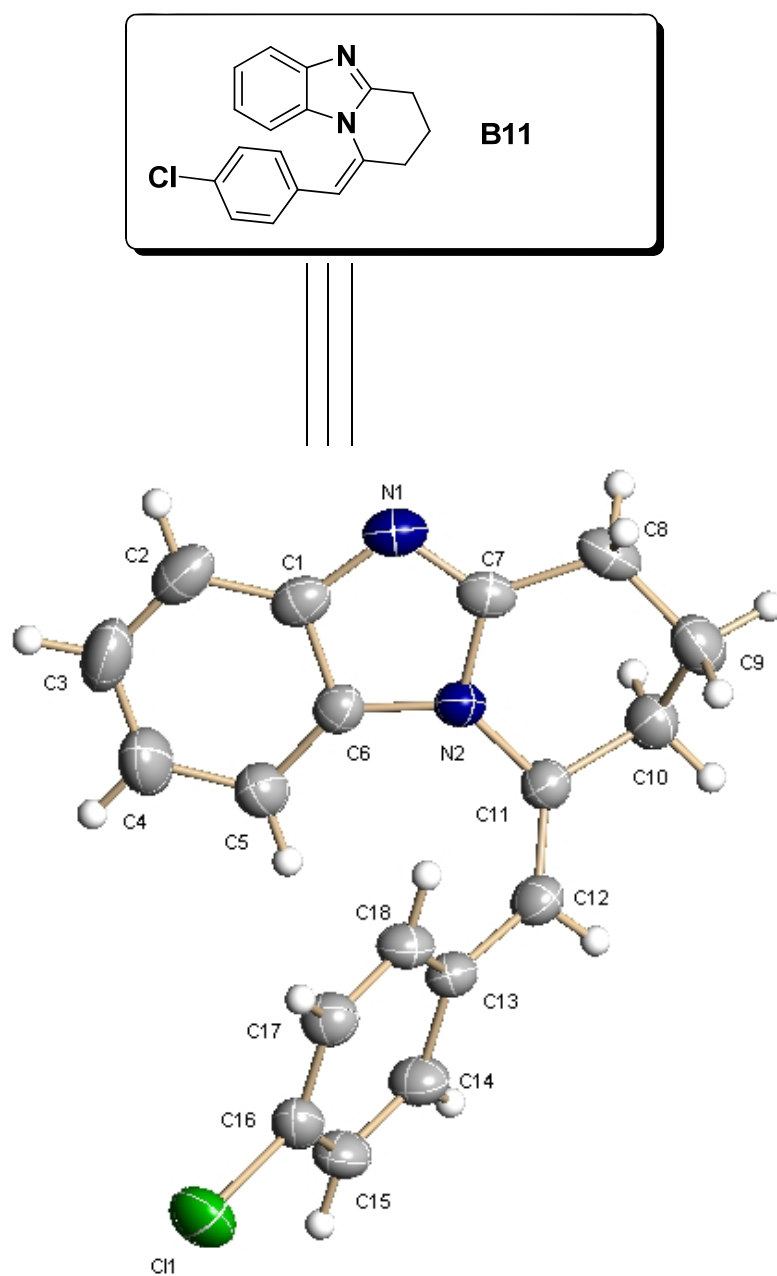

**Figure S1.** X-ray crystallographic structure of **B11**

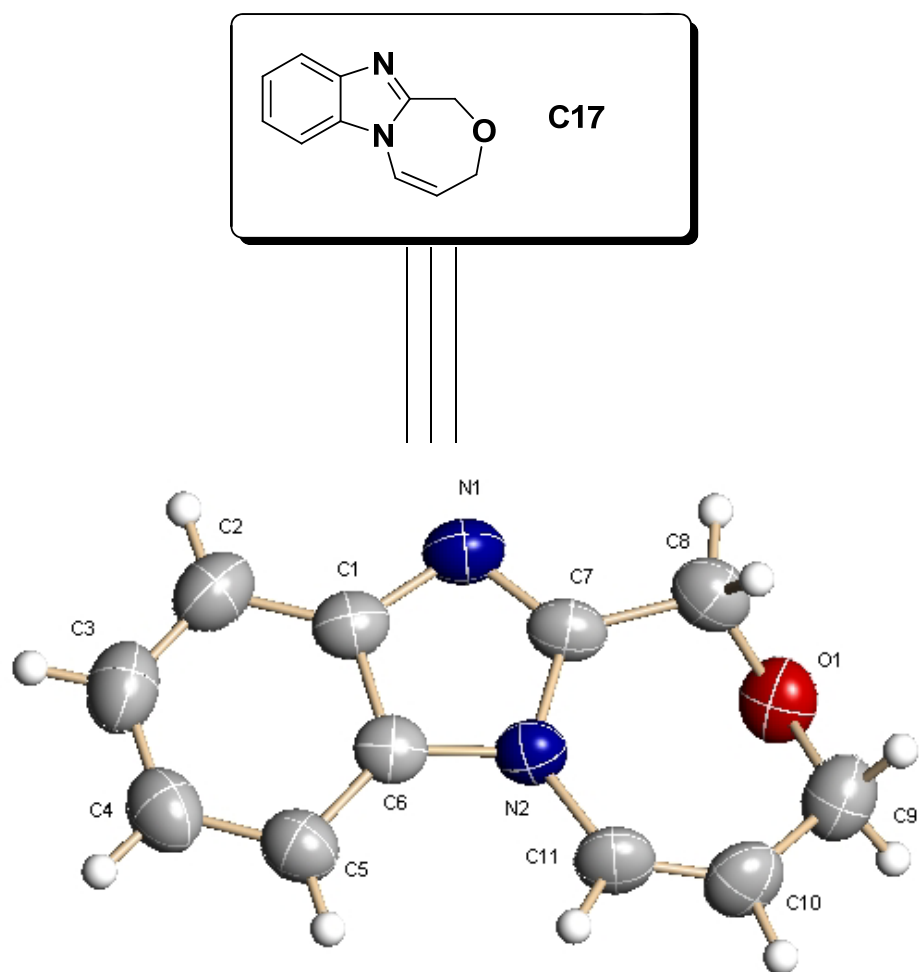

**Figure S2.** X-ray crystallographic structure of **C17**

## The Details of X-ray Crystallographic Structure of B11

Bond precision: C-C = 0.0022 Å Wavelength=0.71073

Cell: a=7.0977(9) b=9.8929(12) c=10.5583(13)  
alpha=81.903(2) beta=84.345(2) gamma=84.315(2)

Temperature: 293 K

|                | Calculated    | Reported      |
|----------------|---------------|---------------|
| Volume         | 727.67(16)    | 727.67(16)    |
| Space group    | P -1          | P-1           |
| Hall group     | -P 1          | ?             |
| Moiety formula | C18 H15 Cl N2 | ?             |
| Sum formula    | C18 H15 Cl N2 | C18 H15 Cl N2 |
| Mr             | 294.77        | 294.77        |
| Dx,g cm-3      | 1.345         | 1.345         |
| Z              | 2             | 2             |
| Mu (mm-1)      | 0.257         | 0.257         |
| F000           | 308.0         | 308.0         |
| F000'          | 308.39        |               |
| h,k,lmax       | 8,12,13       | 8,12,13       |
| Nref           | 2854          | 2802          |
| Tmin,Tmax      | 0.923,0.949   | 0.800,1.000   |
| Tmin'          | 0.923         |               |

Correction method= EMPIRICAL

Data completeness= 0.982 Theta(max)= 26.000

R(reflections)= 0.0450( 2315) wR2(reflections)= 0.1316( 2802)

S = 1.075 Npar= 190

CCDC 781700 contains the supplementary crystallographic data for this paper. These data can be also obtained free of charge from The Cambridge Crystallographic Data Centre via

[www.ccdc.cam.ac.uk/data\\_request/cif](http://www.ccdc.cam.ac.uk/data_request/cif).

### The Details of X-ray Crystallographic Structure of C17

Bond precision: C-C = 0.0041 Å Wavelength=0.71073

Cell: a=8.3263(15) b=5.9839(11) c=9.1599(16)  
alpha=90 beta=94.155(3) gamma=90

Temperature: 293 K

|                | Calculated   | Reported     |
|----------------|--------------|--------------|
| Volume         | 455.18(14)   | 455.18(14)   |
| Space group    | P 21         | P2(1)        |
| Hall group     | P 2yb        | ?            |
| Moiety formula | C11 H10 N2 O | ?            |
| Sum formula    | C11 H10 N2 O | C11 H10 N2 O |
| Mr             | 186.21       | 186.21       |
| Dx,g cm-3      | 1.359        | 1.359        |
| Z              | 2            | 2            |
| Mu (mm-1)      | 0.090        | 0.090        |
| F000           | 196.0        | 196.0        |
| F000'          | 196.08       |              |
| h,k,lmax       | 10,7,11      | 10,7,11      |
| Nref           | 1090[ 1985]  | 1080         |
| Tmin,Tmax      | 0.964,0.987  | 0.822,1.000  |
| Tmin'          | 0.964        |              |

Correction method= EMPIRICAL

Data completeness= 0.99/0.54 Theta(max)= 27.000

R(reflections)= 0.0421( 844) wR2(reflections)= 0.0942( 1080)

S = 0.925 Npar= 127

CCDC 781699 contains the supplementary crystallographic data for this paper. These data can be also obtained free of charge from The Cambridge Crystallographic Data Centre via [www.ccdc.cam.ac.uk/data\\_request/cif](http://www.ccdc.cam.ac.uk/data_request/cif).

### **General Information**

Commercially available reagents and solvents were used without further purification. Column chromatography was carried out on silica gel.  $^1\text{H}$  and  $^{13}\text{C}$  NMR spectra were obtained on Varian Mercury-300 and/or Varian Mercury-400 spectrometers (TMS as IS). Chemical shifts were reported in parts per million (ppm,  $\delta$ ) downfield from tetramethylsilane. Proton coupling patterns are described as singlet (s), doublet (d), triplet (t), quartet (q), multipet (m) and broad (br). Low- and high-resolution mass spectra (LRMS and HRMS) were measured on Finnigan MAT 95 spectrometer.

### **General Procedure for Synthesis of B1-B27 (C27)**

#### **Classical method using a thermostate oil bath (Method A)**

A mixture of **A** (0.40 mmol), AgOTf (0.02 mmol) was stirred in water (3-5 mL) under  $\text{N}_2$ . The vial was sealed and the mixture was then stirred at 80 °C with oil heating for 8-60 h. After the reaction was cooled to ambient temperature, the crude reaction mixture was extracted three times with EA (15 mL  $\times$  3). The combined organic phase was wash with saturated  $\text{NaHCO}_3$  solution, brine, dried with  $\text{Na}_2\text{SO}_4$  and concentrated. The residue was purified by column chromatography on combiflash to provide the desired product **B**.

#### **Microwave method (Method B)**

A mixture of **A** (0.40 mmol), AgOTf (0.02 mmol) was stirred in water (3-5 mL) under  $\text{N}_2$ . The vial was sealed and the mixture was then irradiated for 15 min at 150 °C. After the reaction was cooled to ambient temperature, the crude reaction mixture was extracted three times with EA (15 mL  $\times$  3). The combined organic phase was wash with saturated  $\text{NaHCO}_3$  solution, brine, dried with  $\text{Na}_2\text{SO}_4$  and concentrated. The residue was purified by column chromatography on combiflash to provide the desired product **B(C)**.

### Labeling studies with deuterated solvents.

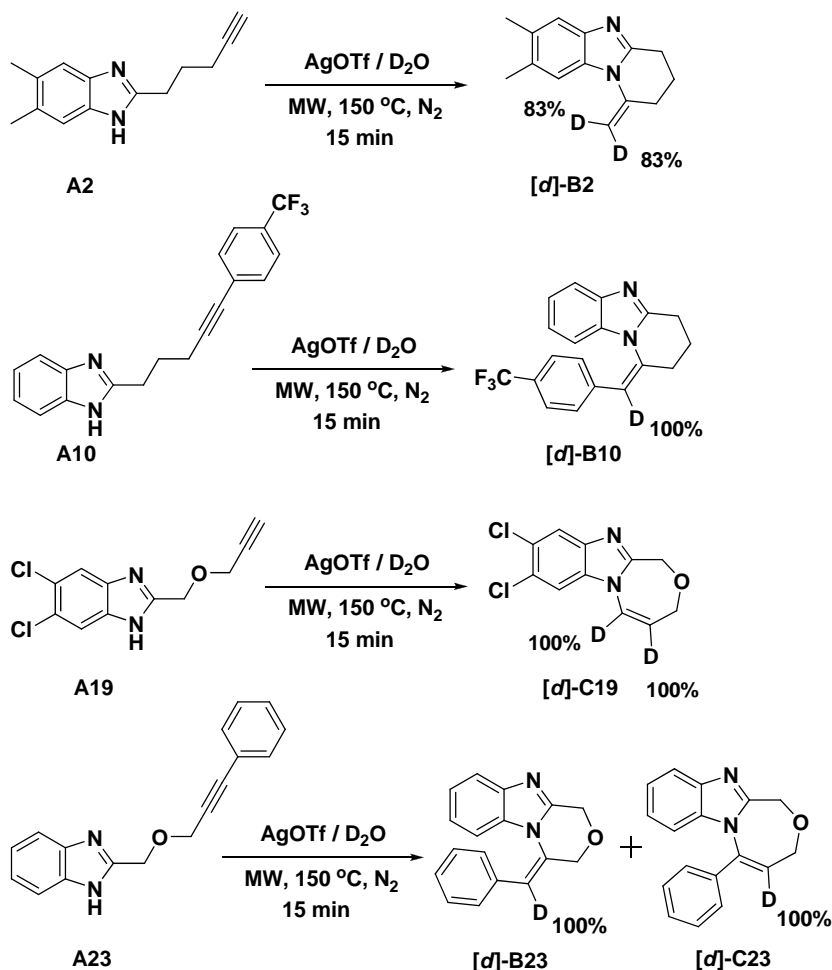

A mixture of substituted benzimidazoles **A2**, **A10**, **A19**, or **A23** (0.1 mmol),  $\text{AgOTf}$  (0.005 mmol) was stirred in  $\text{D}_2\text{O}$  (2 mL) under  $\text{N}_2$  atmosphere, respectively. The vial was sealed and the mixture was then irradiated for 15 min at 150 °C. After the reaction was cooled to ambient temperature, the crude reaction mixture was extracted three times with EA (15 mL  $\times$  3). The combined organic phase was wash with saturated  $\text{NaHCO}_3$  solution, brine, dried with  $\text{Na}_2\text{SO}_4$  and concentrated. The residue was purified by column chromatography on combiflash to provide the desired products **[d]-B2**, **[d]-B10**, **[d]-C19**, **[d]-B23** and **[d]-C23** which were analyzed using  $^1\text{H}$  NMR spectroscopy to determine the content of the deuterium incorporation.

**[d]-B2:**  $^1\text{H}$  NMR (300 MHz,  $\text{CDCl}_3$ ):  $\delta$  2.00-2.08 (m, 2H,  $\text{CH}_2$ ), 2.35 (s, 3H,  $\text{CH}_3$ ), 2.37 (s, 3H,  $\text{CH}_3$ ), 2.61-2.65 (m, 2H,  $\text{CH}_2$ ), 3.11 (t, 2H,  $\text{CH}_2$ ), 7.44-7.45 (m, 2H, ArH);



LC-MS:  $m/z$  215  $[M + H]^+$ .

**[d]-B10:**  $^1\text{H}$  NMR (300 MHz,  $\text{CDCl}_3$ ):  $\delta$  2.24-2.28 (m, 2H,  $\text{CH}_2$ ), 2.69 (t, 2H,  $\text{CH}_2$ ), 3.31 (t, 2H,  $\text{CH}_2$ ), 6.27-6.30 (d,  $J = 8.4$  Hz, 1H, ArH), 6.80-6.86 (m, 1H, ArH), 7.04-7.07 (d, 2H, ArH), 7.11-7.16 (m, 1H, ArH), 7.35-7.38 (d, 2H, ArH), 7.64-7.66 (d,  $J = 7.5$  Hz, 1H, ArH); LC-MS:  $m/z$  330  $[M + H]^+$ .

**[d]-C19:**  $^1\text{H}$  NMR (300 MHz,  $\text{CDCl}_3$ ):  $\delta$  4.61 (s, 2H,  $\text{CH}_2$ ), 4.94 (s, 2H,  $\text{CH}_2$ ), 7.48 (s, 1H, ArH), 7.79 (s, 1H, ArH); LC-MS:  $m/z$  257  $[M + H]^+$ .

**[d]-B23:**  $^1\text{H}$  NMR (300 MHz,  $\text{CDCl}_3$ ):  $\delta$  4.46 (s, 2H,  $\text{CH}_2$ ), 5.24 (s, 2H,  $\text{CH}_2$ ), 6.22-6.25 (d,  $J = 8.4$  Hz, 1H, ArH), 6.81-6.86 (m, 1H, ArH), 7.01-7.16 (m, 2H, ArH), 7.19-7.23 (m, 4H, ArH), 7.67-7.70 (d,  $J = 8.1$  Hz, 1H, ArH); LC-MS:  $m/z$  264  $[M + H]^+$ .

**[d]-C23:**  $^1\text{H}$  NMR (300 MHz,  $\text{CDCl}_3$ ):  $\delta$  4.18 (s, 2H,  $\text{CH}_2$ ), 4.94 (s, 2H,  $\text{CH}_2$ ), 6.50-6.53 (d,  $J = 8.4$  Hz, 1H, ArH), 7.01-7.07 (m, 1H, ArH), 7.23-7.28 (m, 1H, ArH), 7.34-7.49 (m, 5H, ArH), 7.80-7.83 (d,  $J = 7.8$  Hz, 1H, ArH); LC-MS:  $m/z$  264  $[M + H]^+$ .

### Labeling studies with deuterated starting materials.

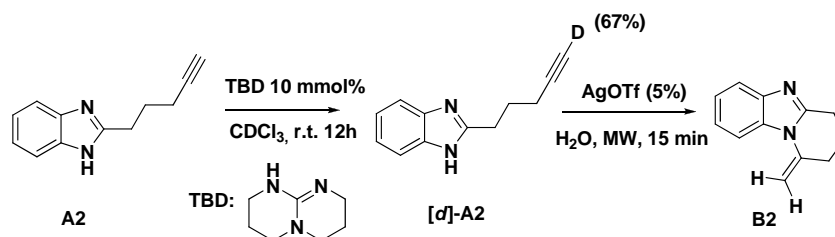

Deuterated 5,6-Dimethyl-2-(pent-4-ynyl)-1*H*-benzo[*d*]imidazole [***d***]-**A2** was prepared in 85% yield with 67% deuterium incorporation at the terminal alkynyl site according to the method reported in ref S(1). A mixture of [***d***]-**A2** (0.1 mmol), AgOTf (0.005 mmol) was stirred in H<sub>2</sub>O (2 mL) under N<sub>2</sub> atmosphere. The vial was sealed and the mixture was then irradiated for 15 min at 150 °C. After the reaction was cooled to ambient temperature, the crude reaction mixture was extracted three times with EA (15 mL × 3). The combined organic phase was wash with saturated NaHCO<sub>3</sub> solution, brine, dried with Na<sub>2</sub>SO<sub>4</sub> and concentrated. The residue was purified by column chromatography on combiflash to provide the desired product **B2**, which was analyzed using <sup>1</sup>H NMR spectroscopy to determine the content of the deuterium incorporation.

**[d]-A2:** <sup>1</sup>H NMR (300 MHz, CDCl<sub>3</sub>): δ 1.93-1.96 (m, 0.33H, CH), 2.03-2.11 (m, 2H, CH<sub>2</sub>), 2.24-2.83 (m, 2H, CH<sub>2</sub>), 2.34 (s, 6H, CH<sub>3</sub>), 3.02-3.07 (m, 2H, CH<sub>2</sub>), 7.32(s, 2H, ArH); LC-MS: *m/z* 214 [M + H]<sup>+</sup>.

Ref S(1). Sabot, C.; Kumar, K. A.; Antherume, C.; Mioskowski, C. *J. Org. Chem.* **2007**, 72, 5001-5007.

# Copies of $^1\text{H}$ NMR and $^{13}\text{C}$ NMR of B1-[*d*]C24

## 1-Methylene-1,2,3,4-tetrahydro-pyrido[1,2-*a*]benzimidazole (B1)

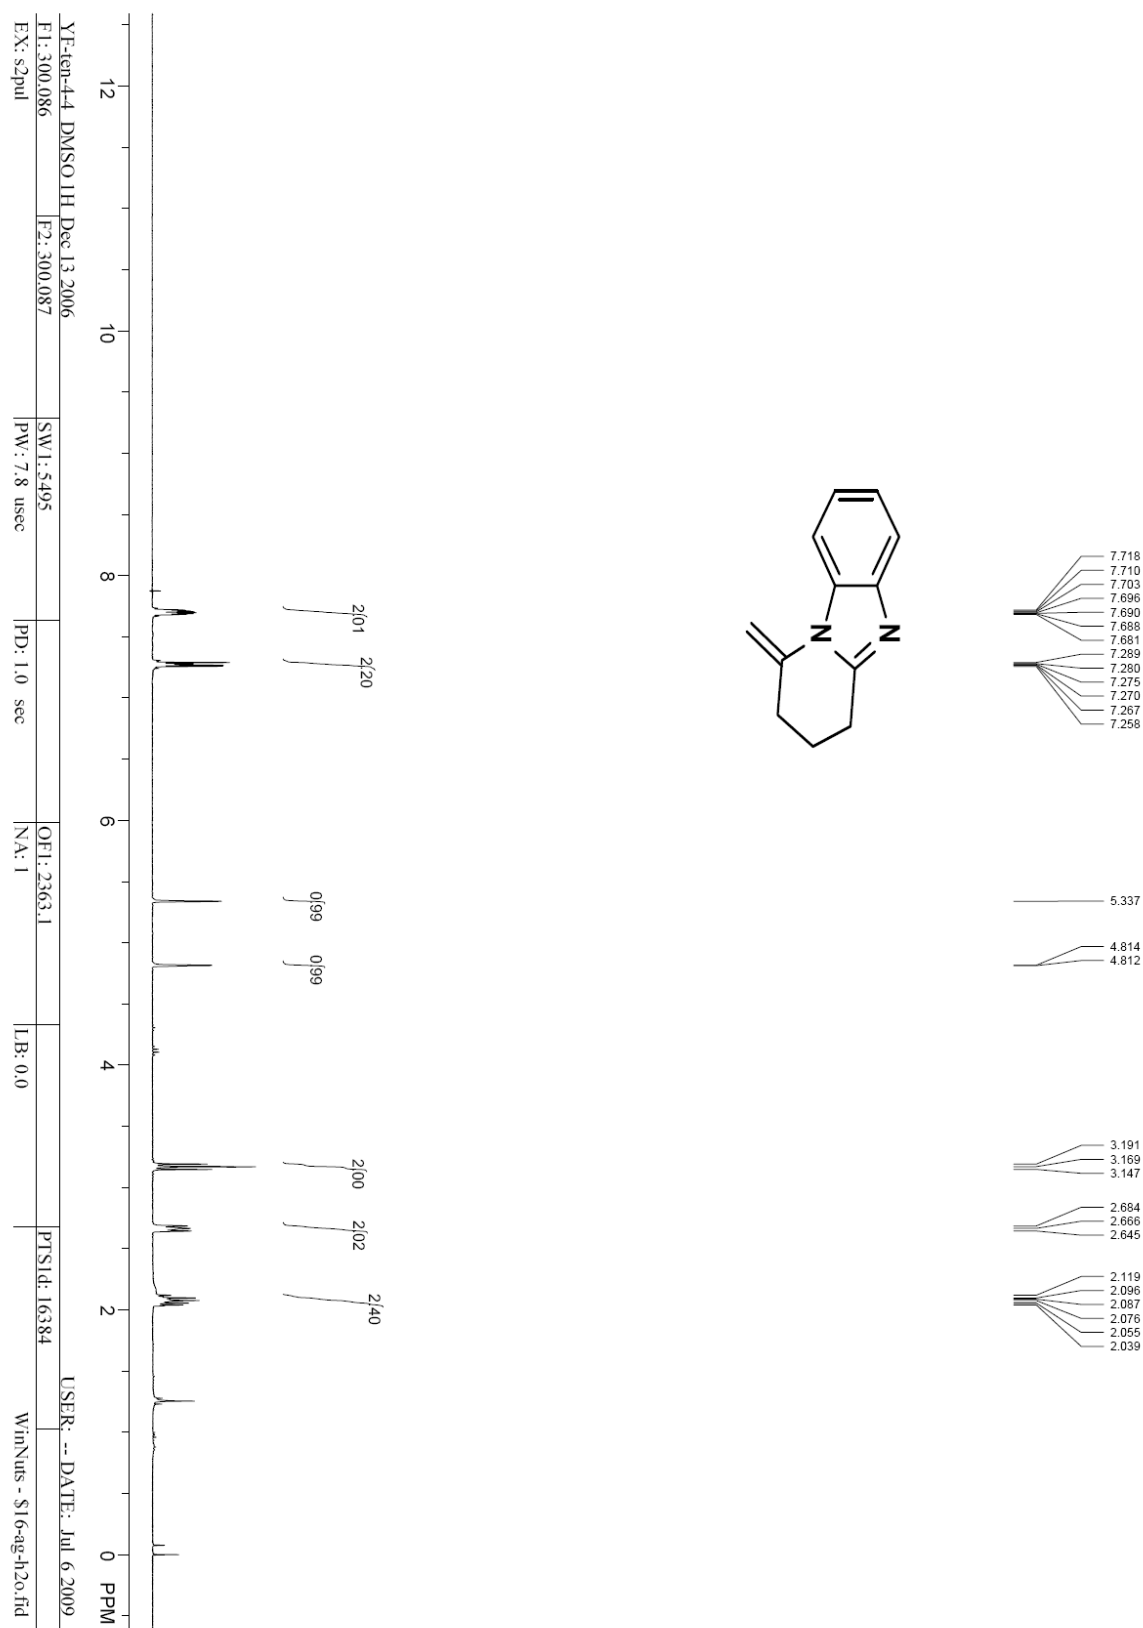

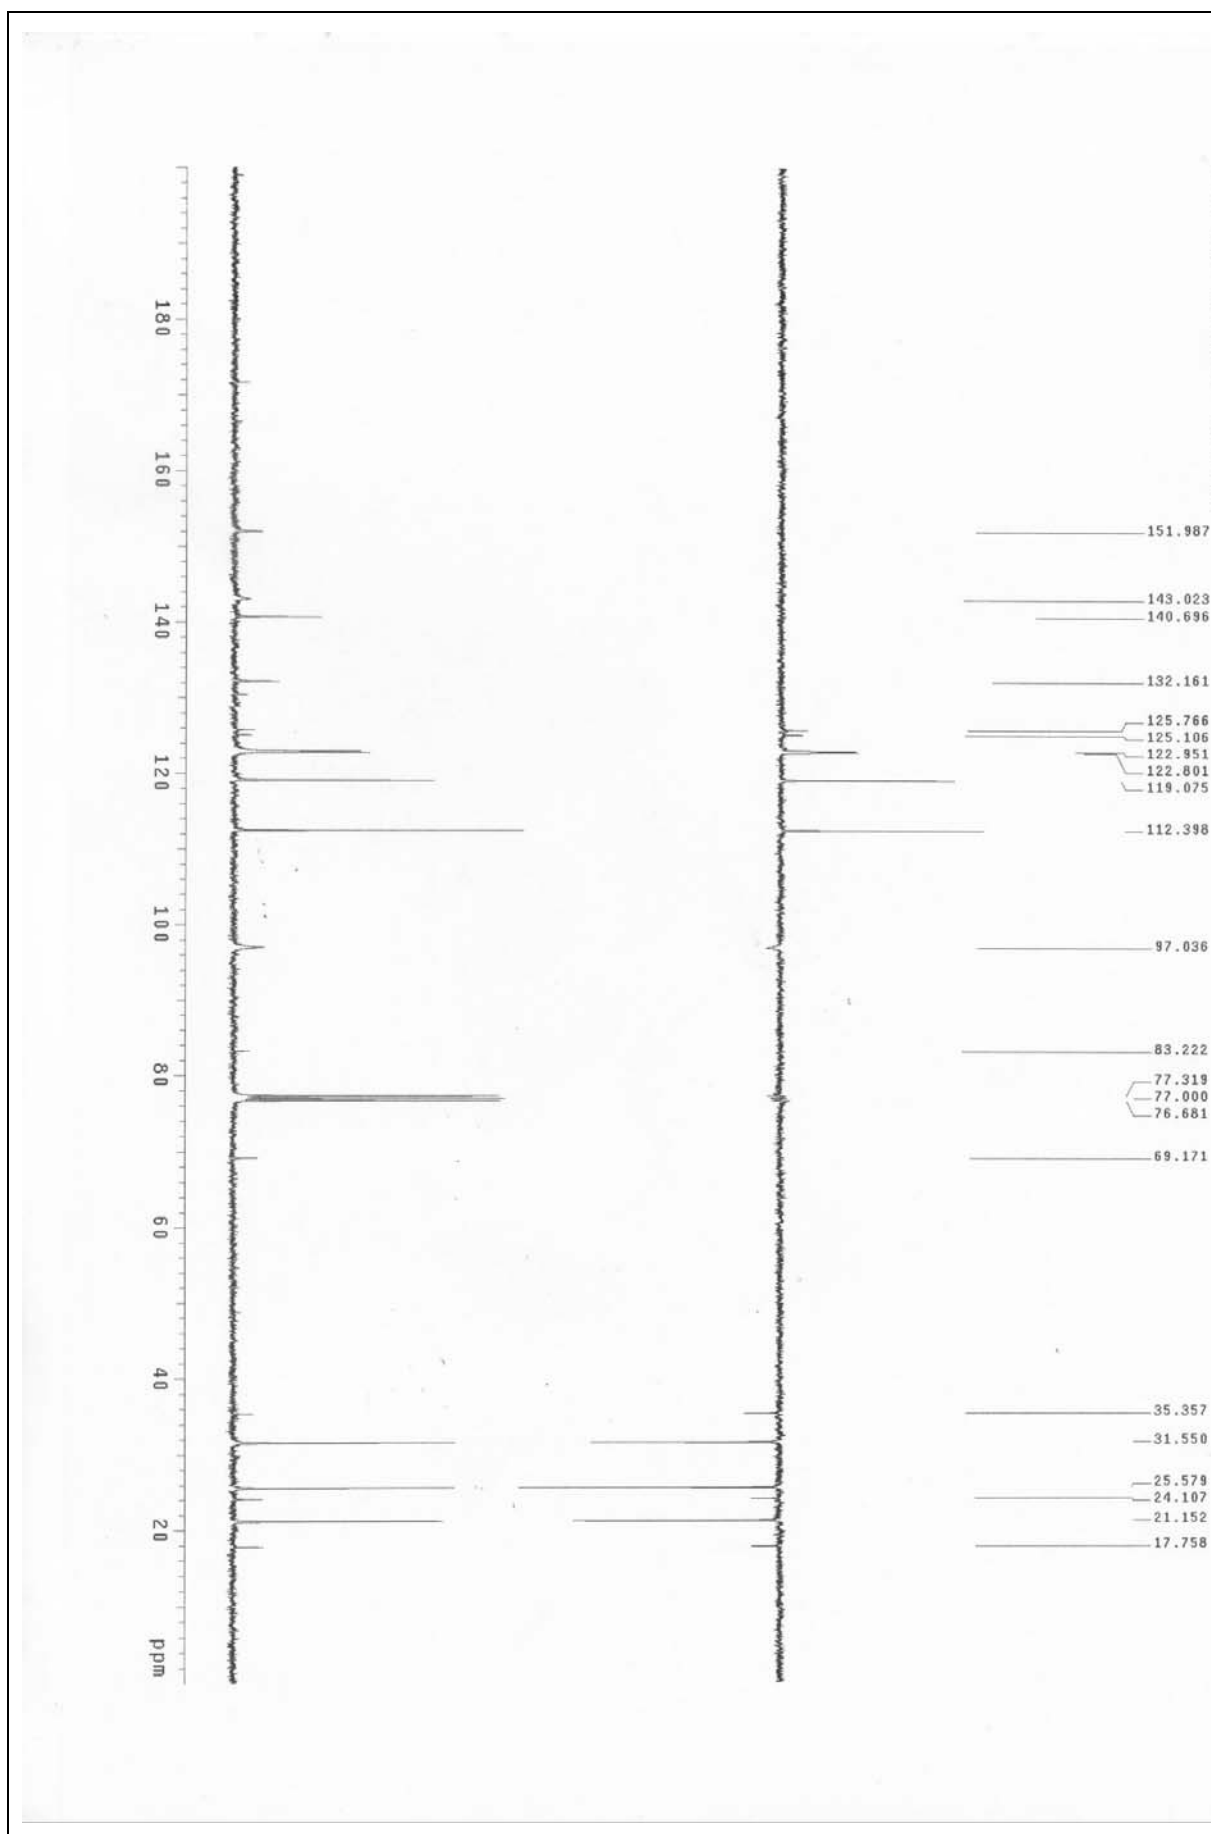

# 7,8-Dimethyl-1-methylene-1,2,3,4-tetrahydro-pyrido[1,2-*a*]benzimidazole (B2)

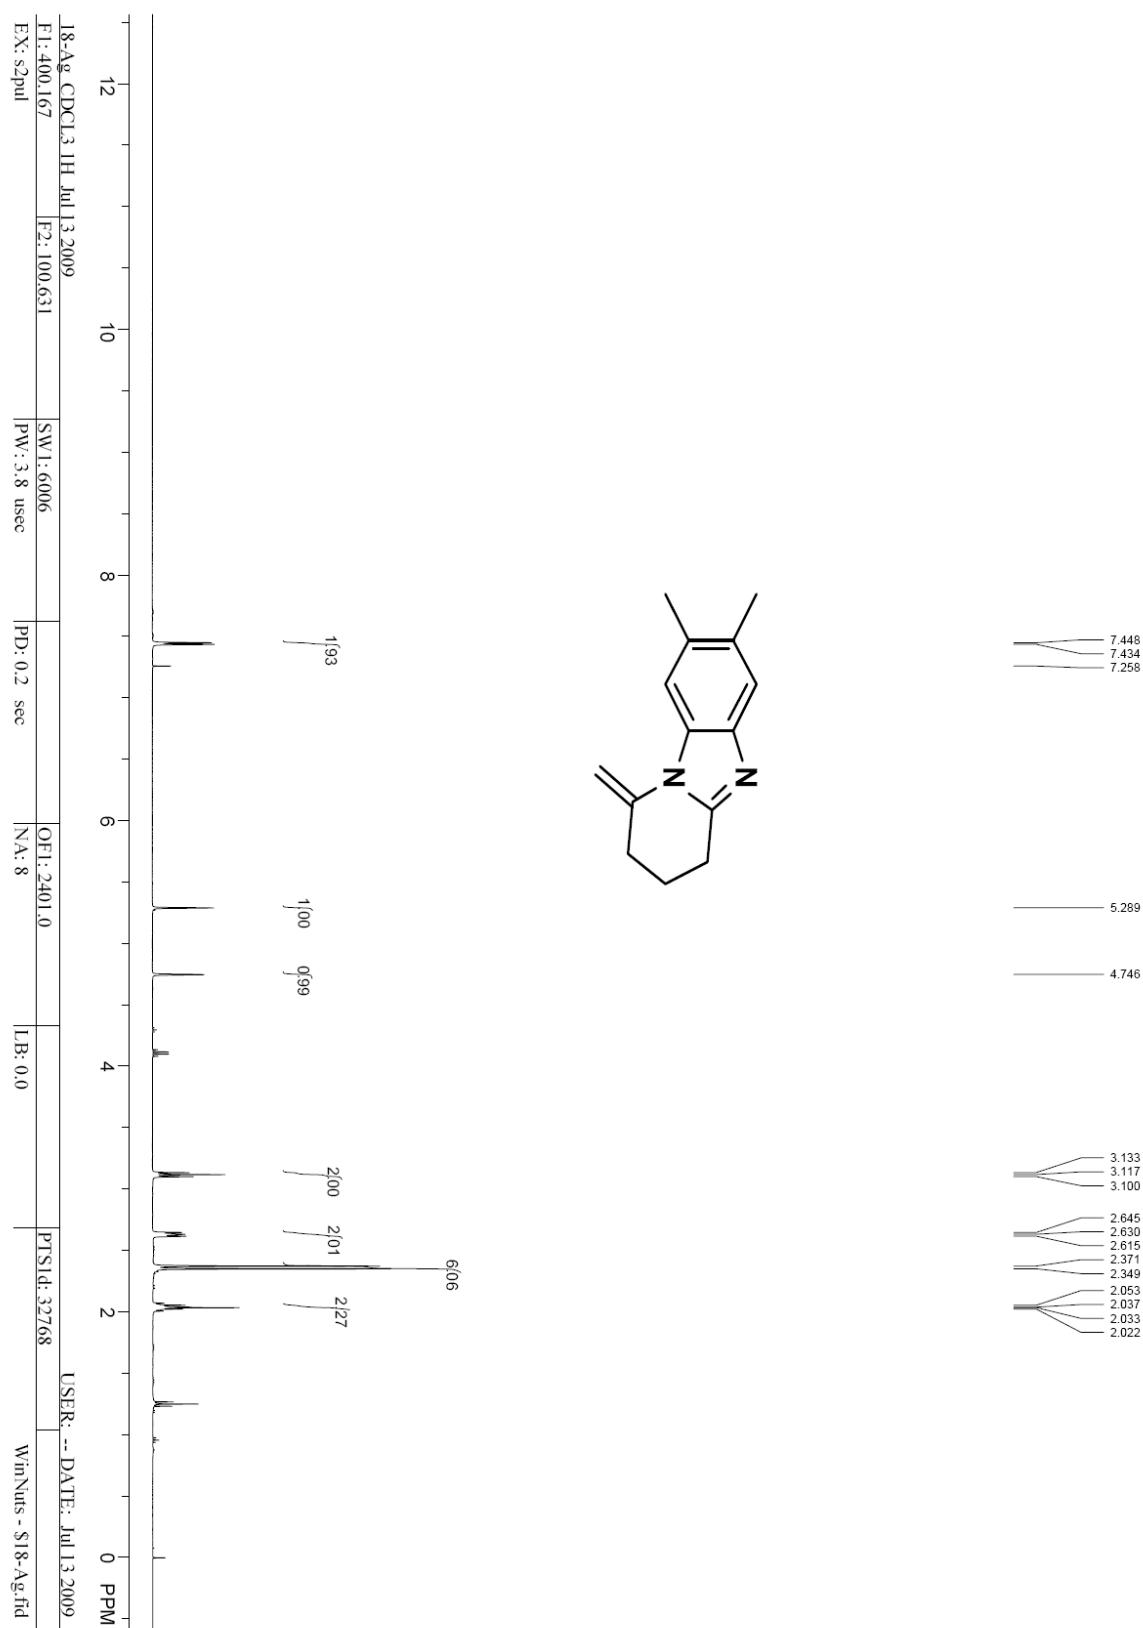

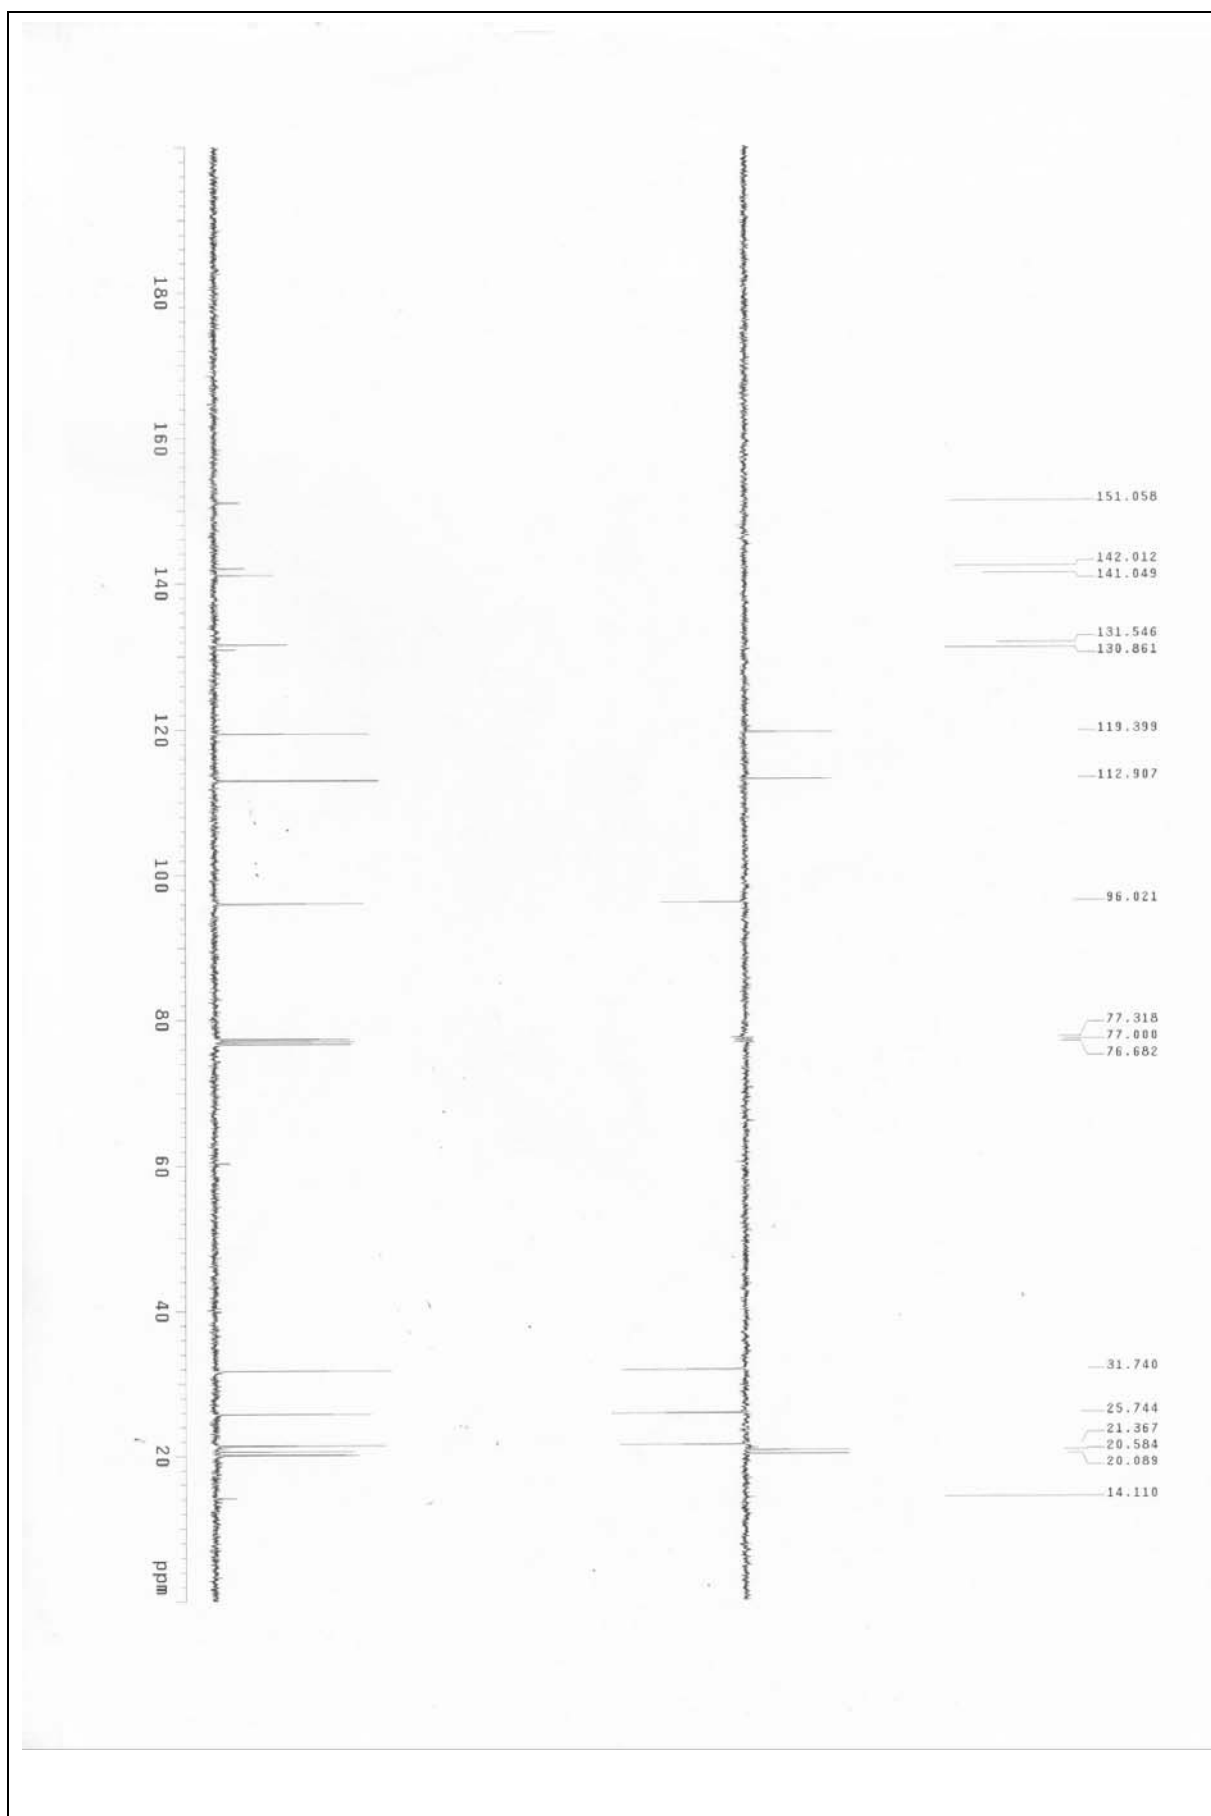

# 7,8-Dichloro-1-methylene-1,2,3,4-tetrahydro-pyrido[1,2-*a*]benzimidazole (B3)

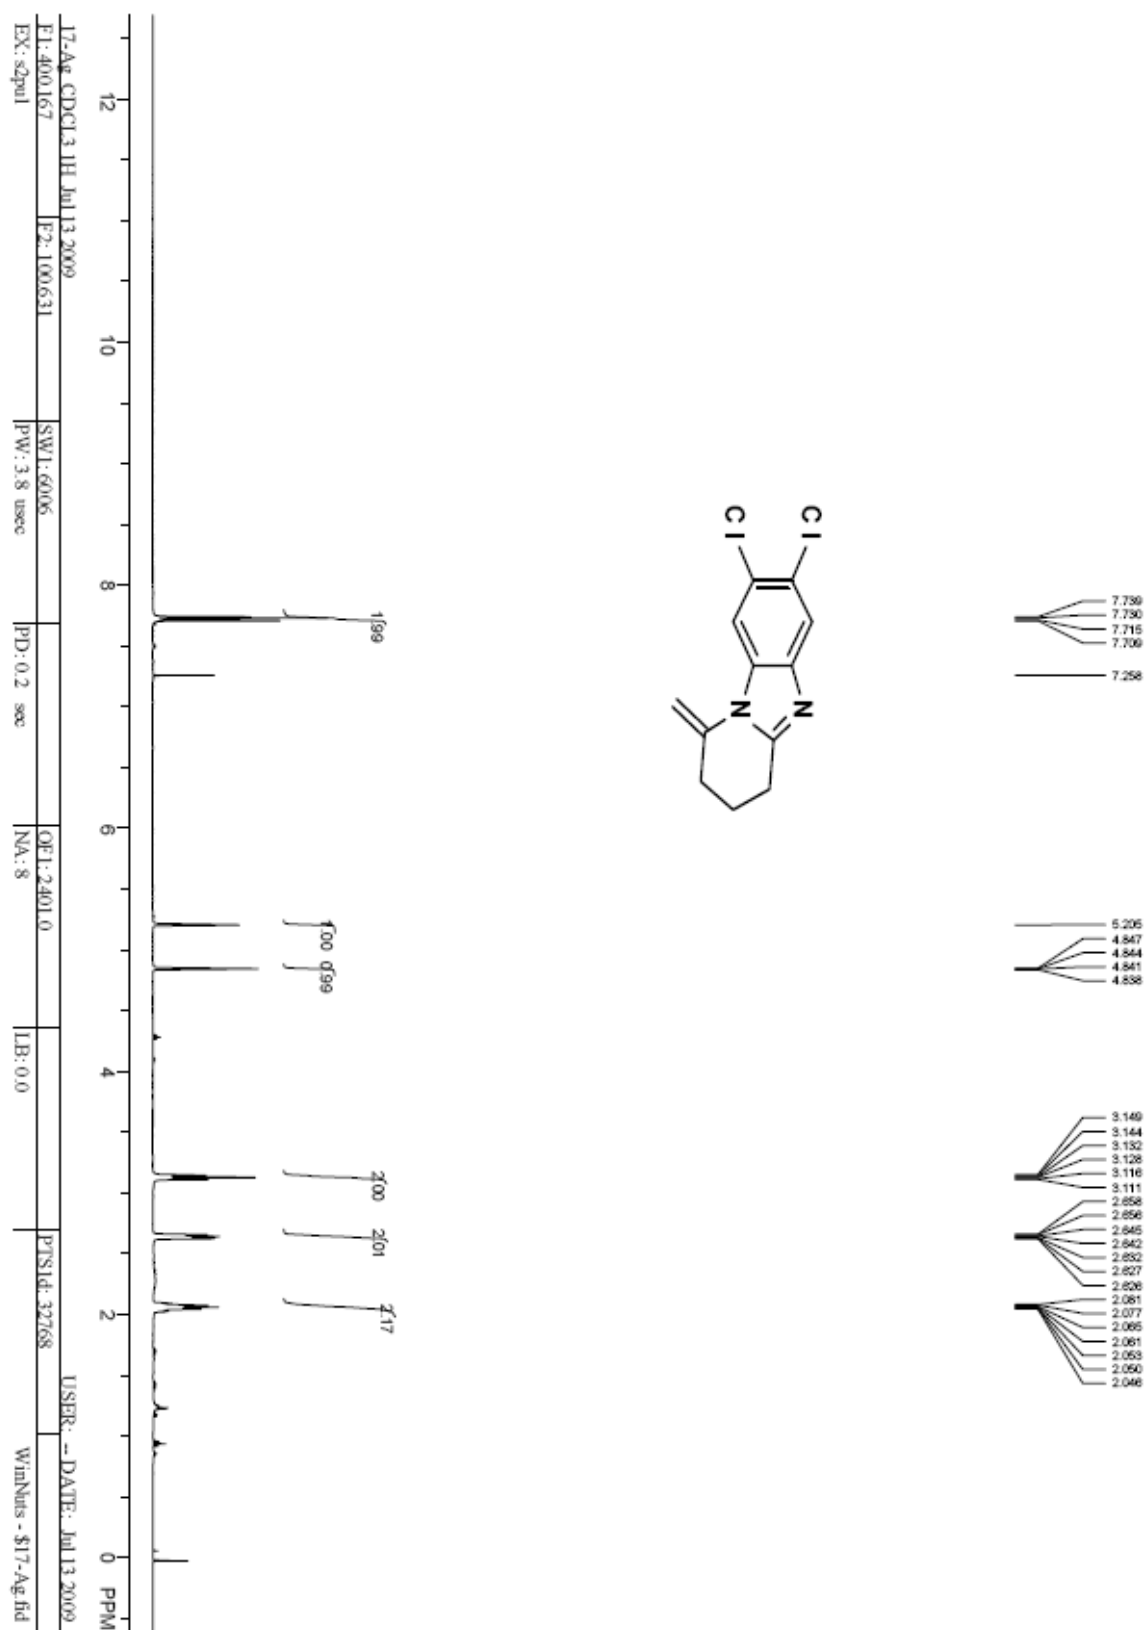

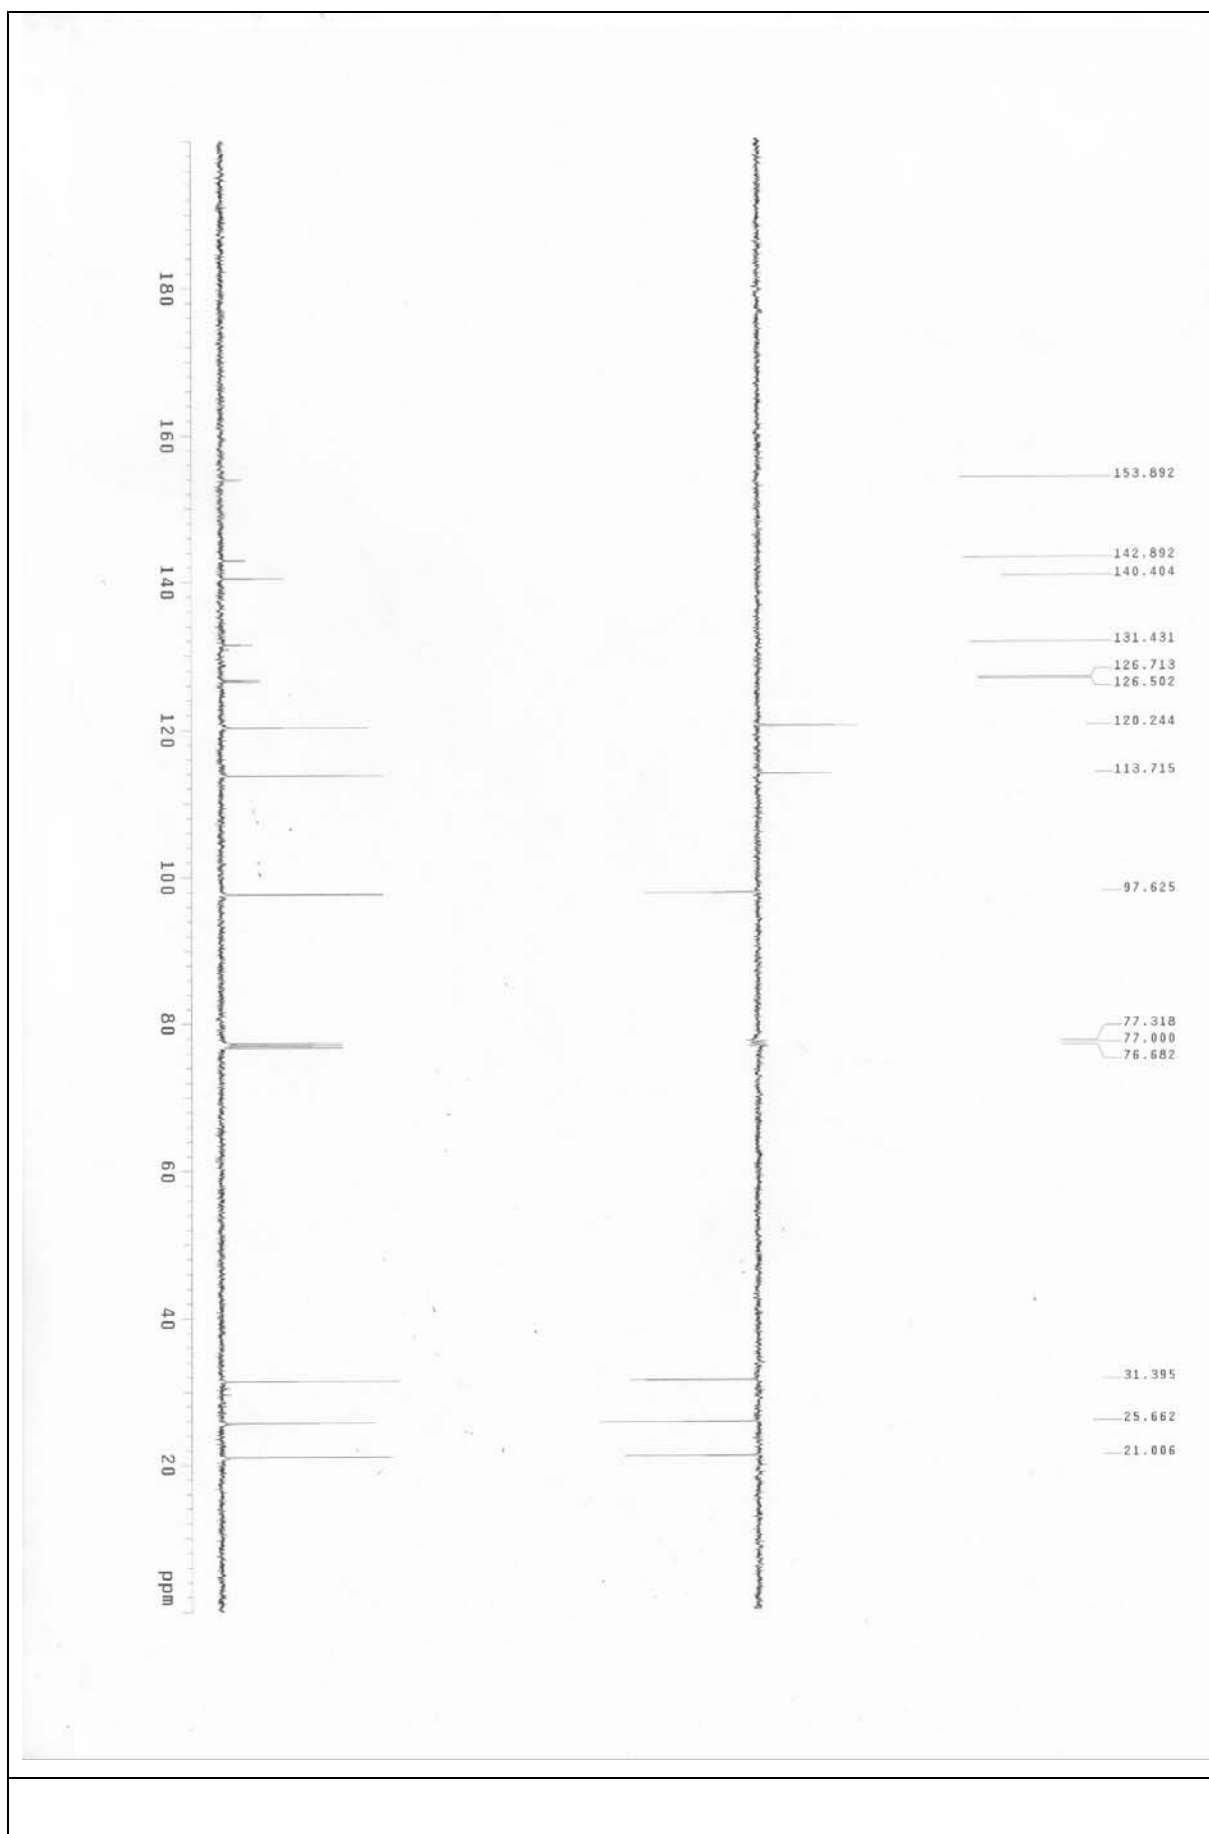





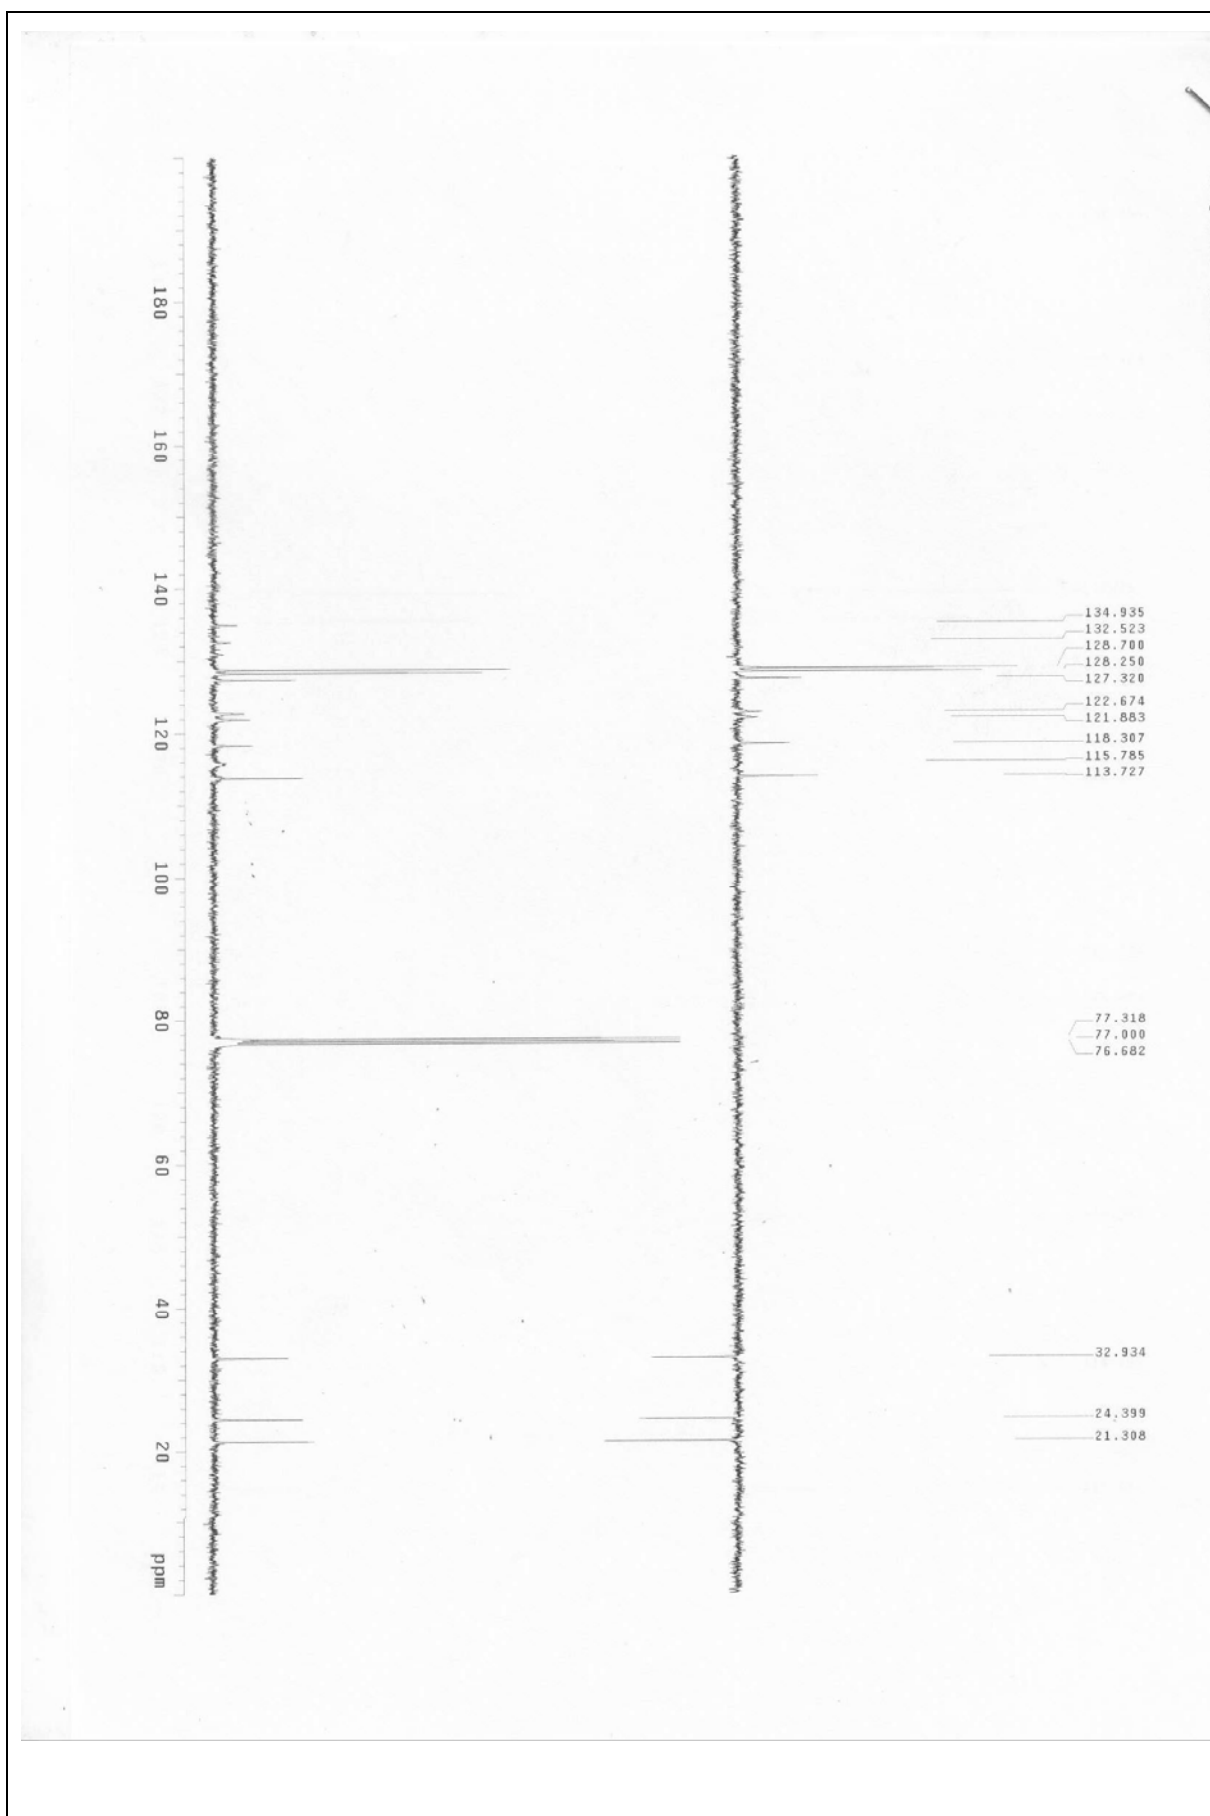

# 7,8-Dimethyl-1-[1-phenyl-meth-(Z)-ylidene]-1,2,3,4-tetrahydro-pyrido[1,2-a]benzimidazole (B5)

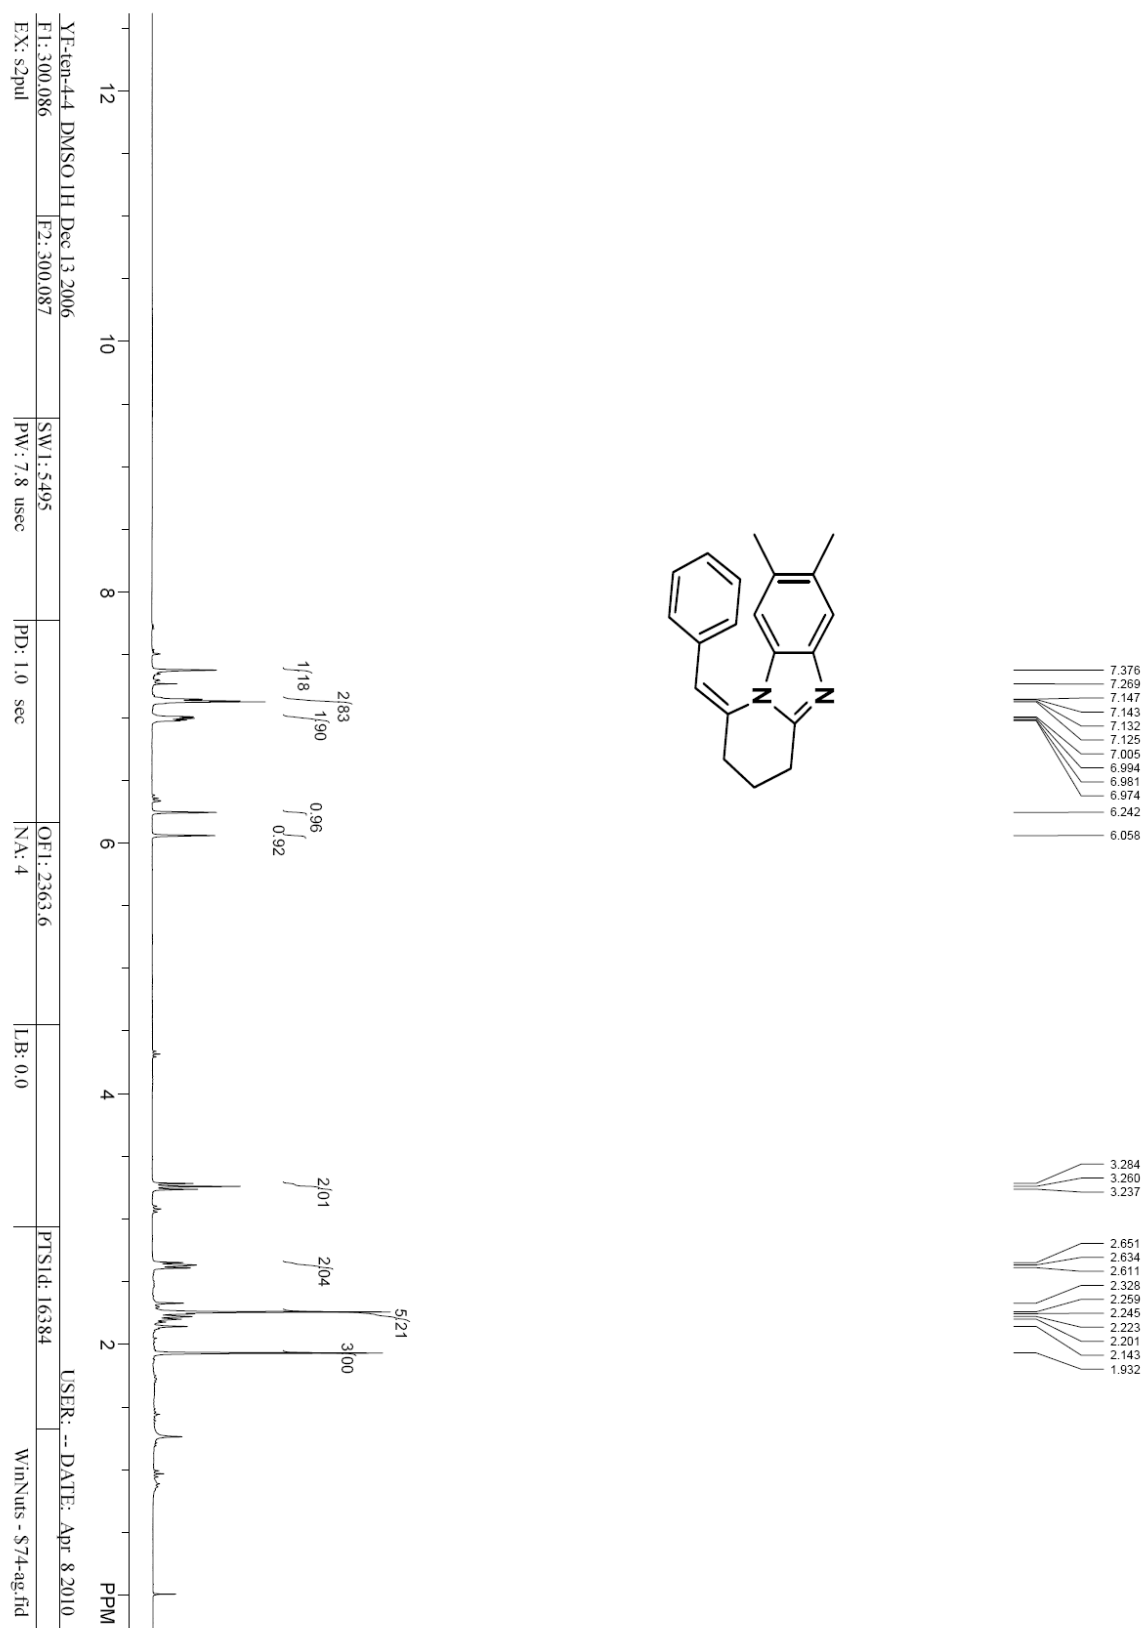

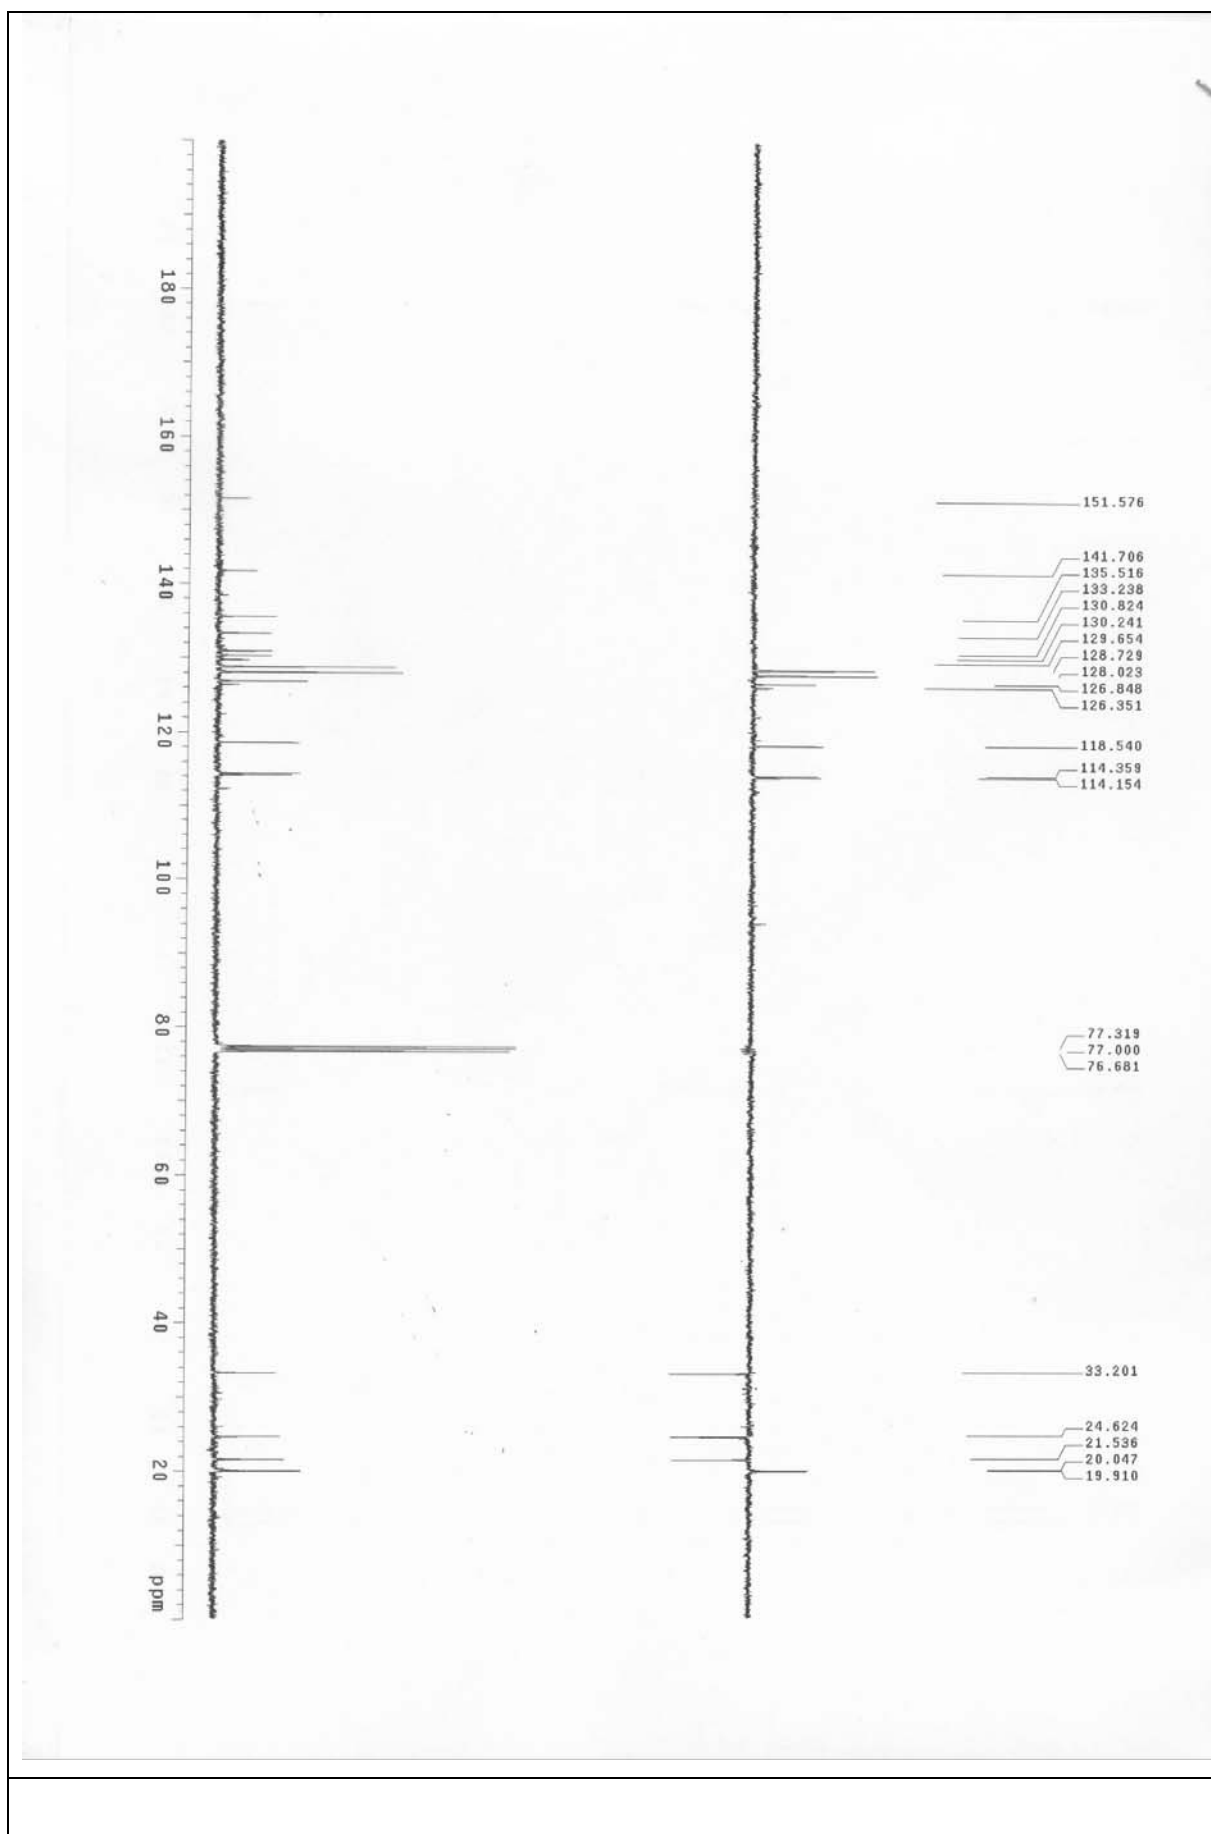

**7,8-Dichloro-1-[1-phenyl-meth-(Z)-ylidene]-1,2,3,4-tetrahydro-pyrido[1,2-*a*]benzimidazole (B6)**

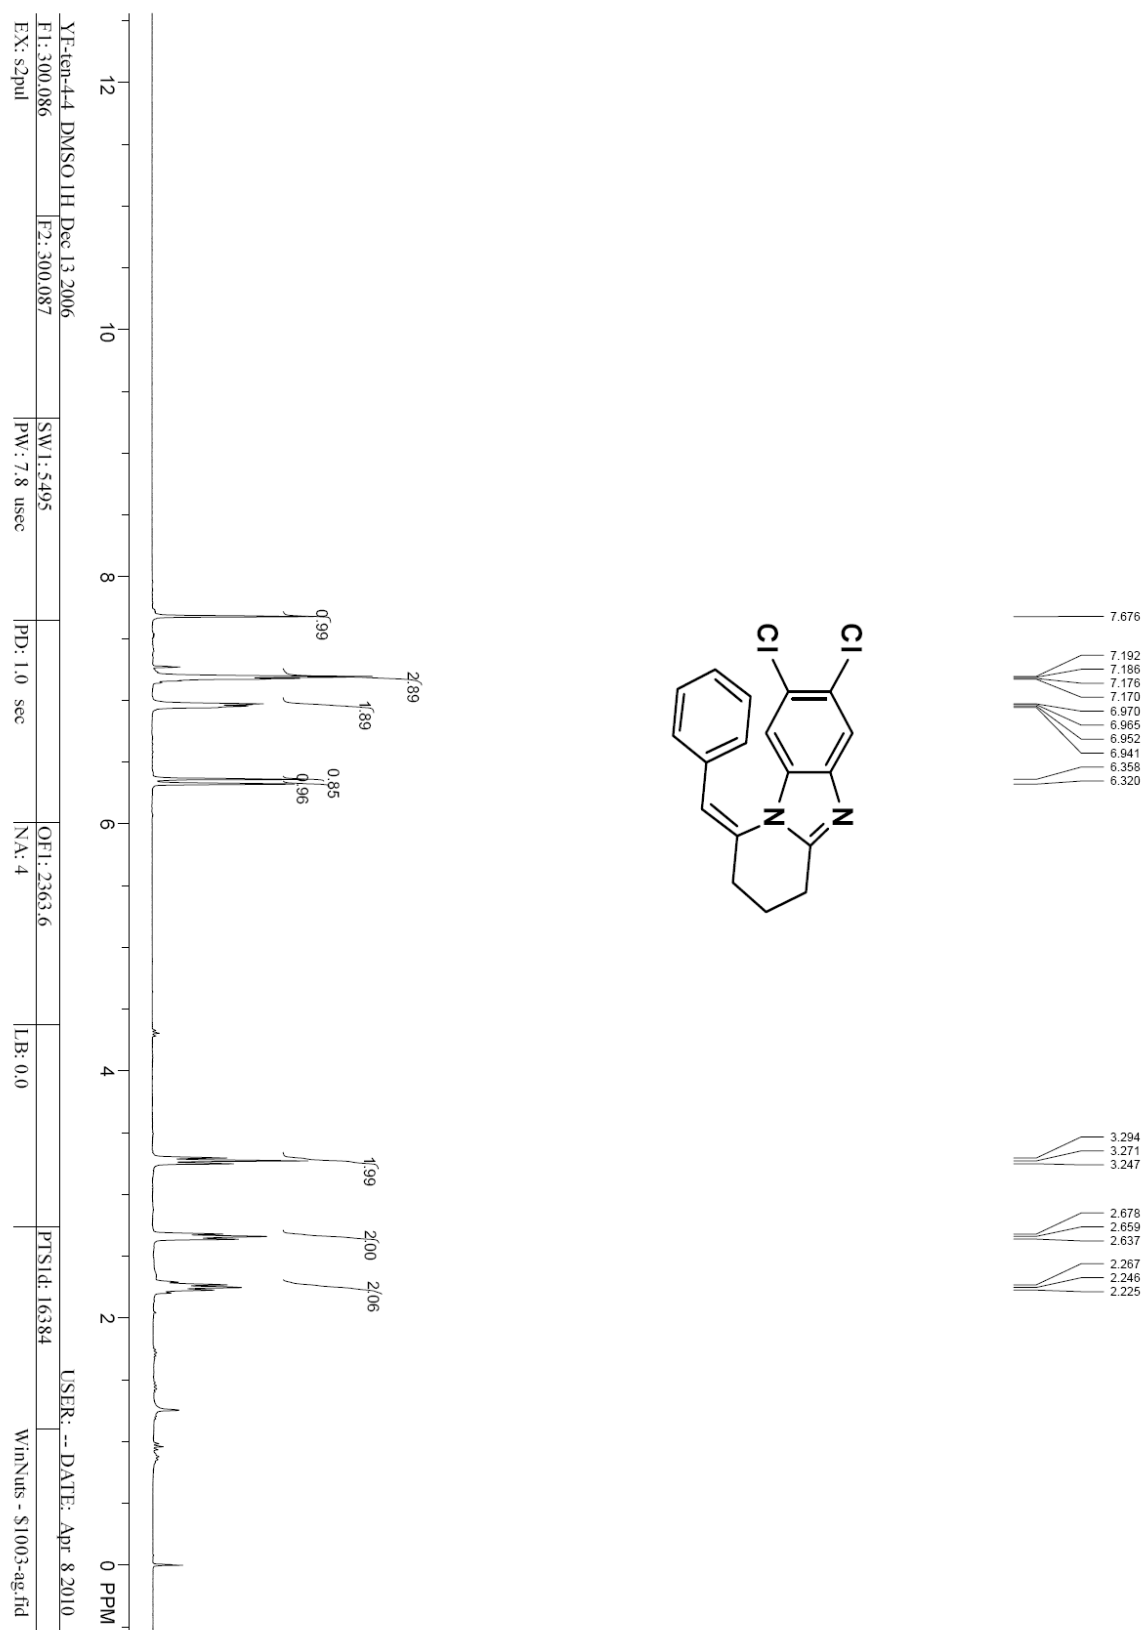

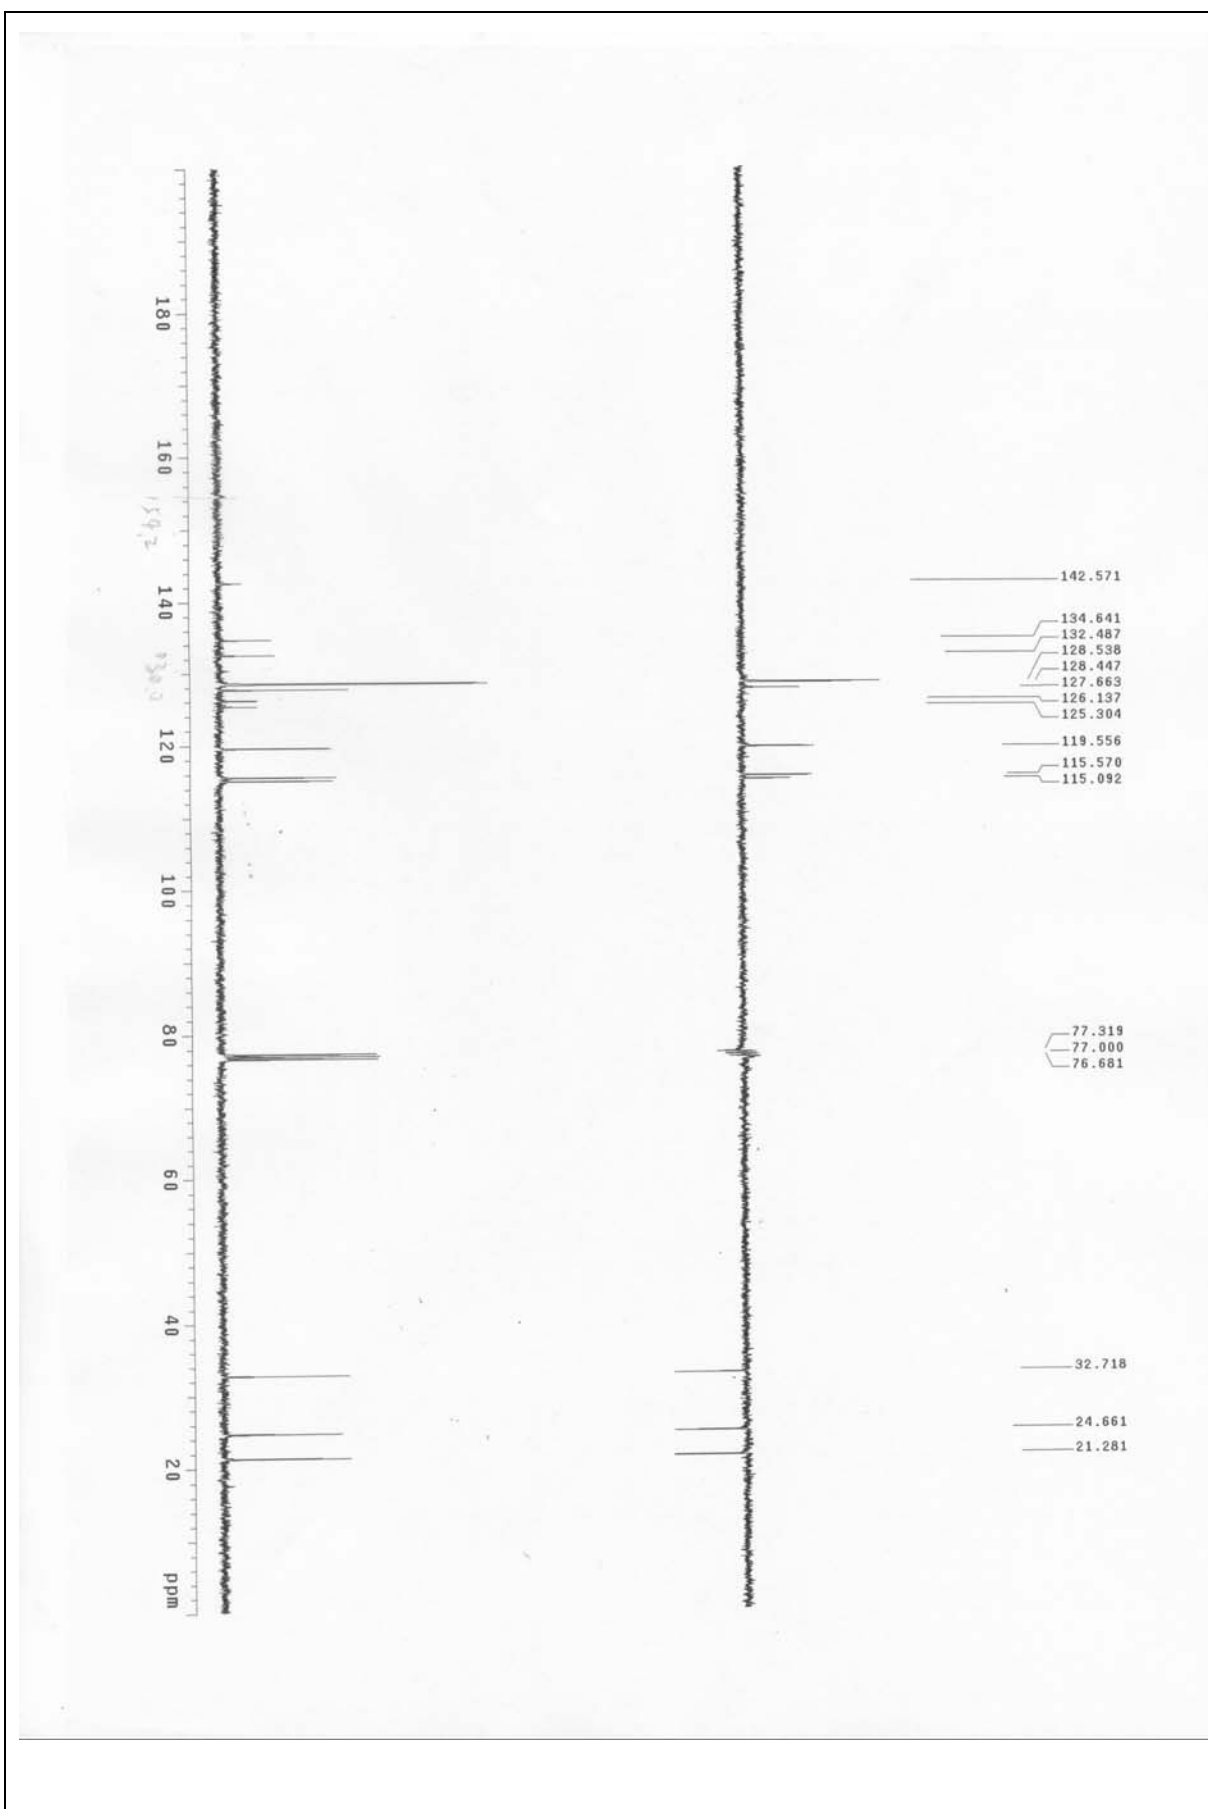

**1-[1-(4-Methoxy-phenyl)-meth-(Z)-ylidene]-1,2,3,4-tetrahydro-pyrido[1,2-*a*]benzimidazole (B7)**

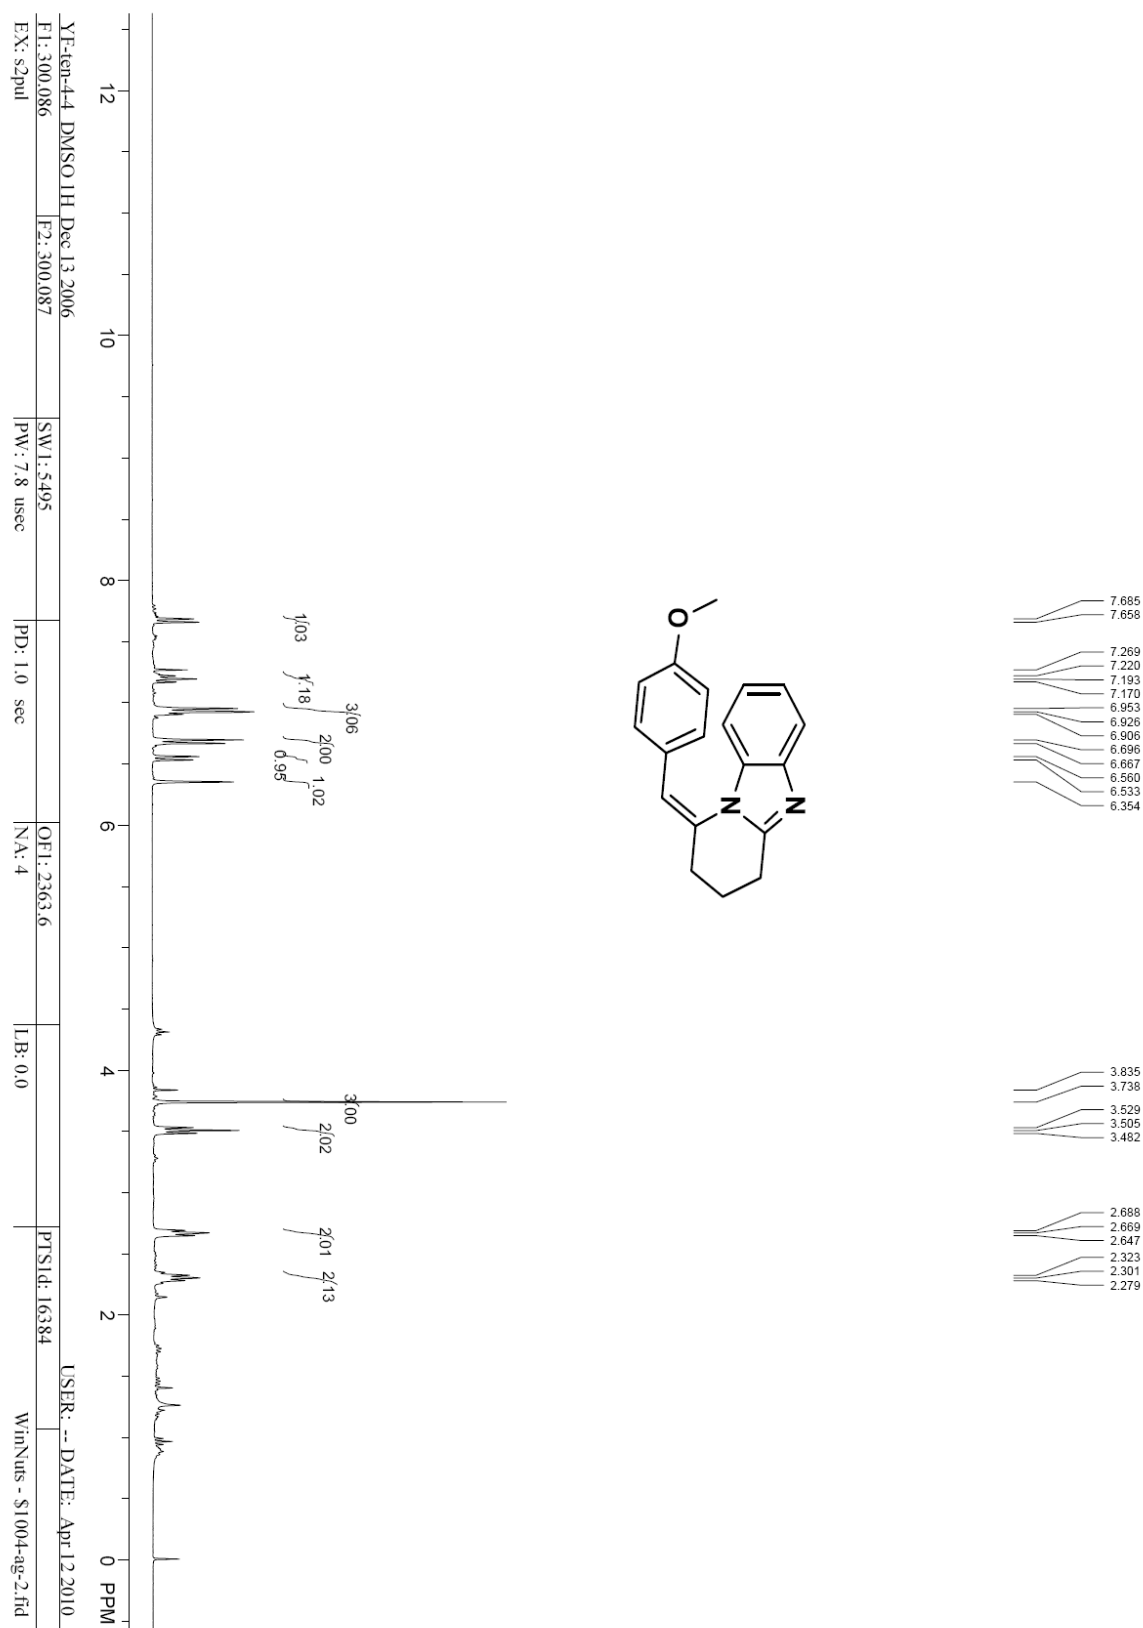

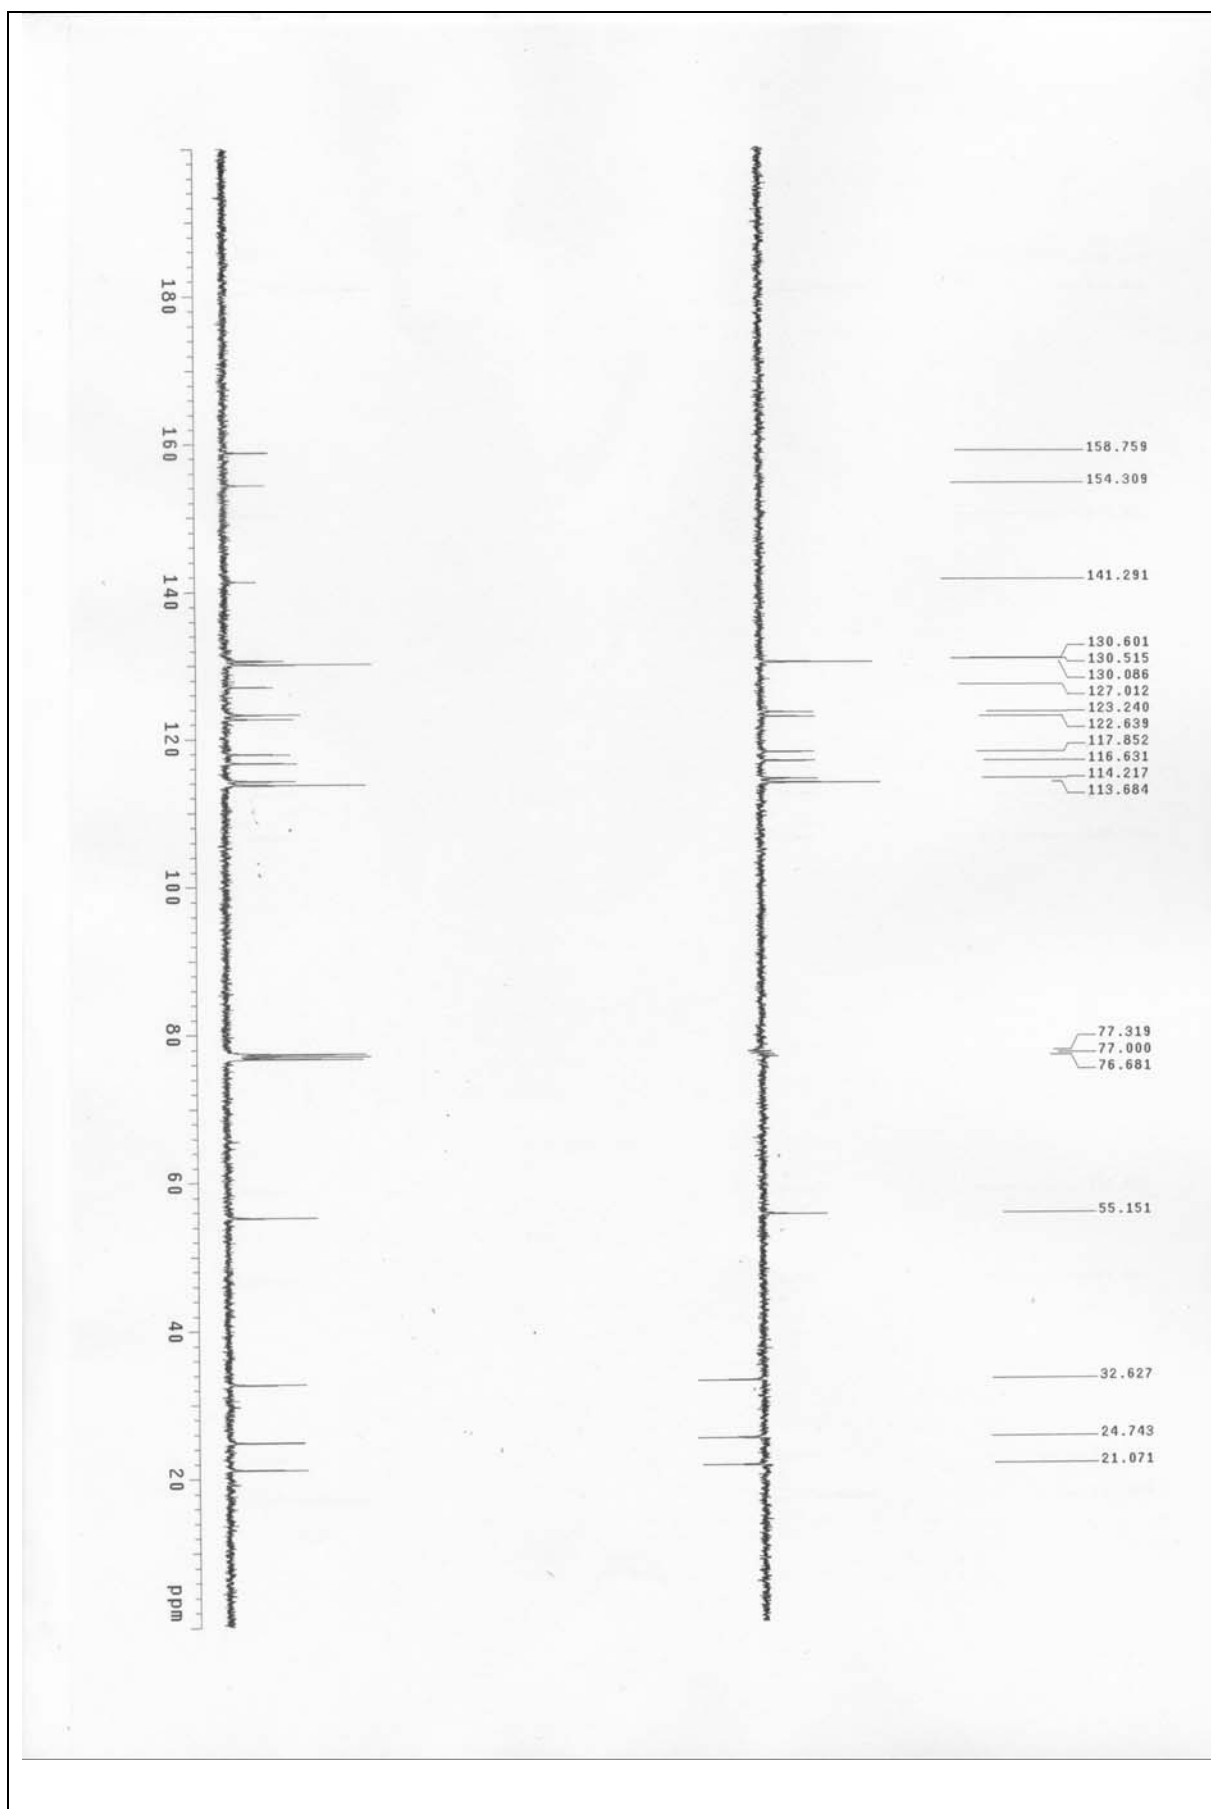



**1-[1-(2-Trifluoromethyl-phenyl)-meth-(Z)-ylidene]-1,2,3,4-tetrahydro-pyrido[1,2-*a*]benzimidazole (B8)**

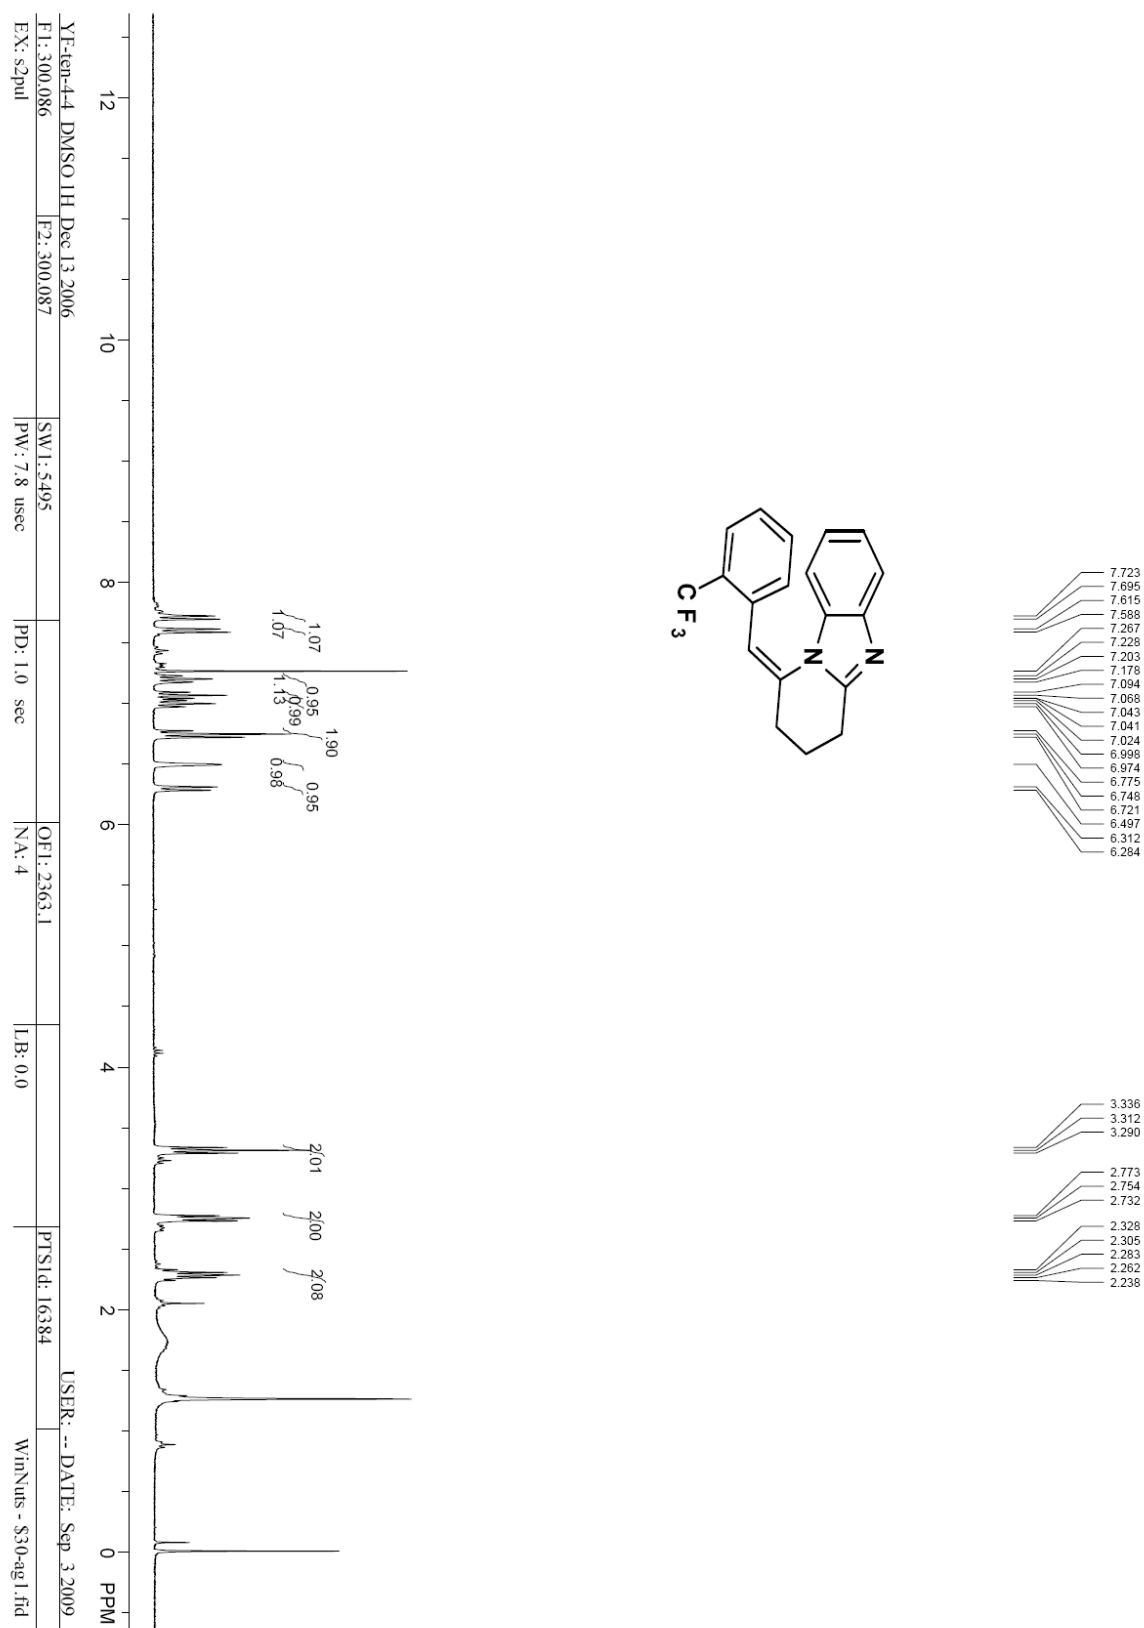

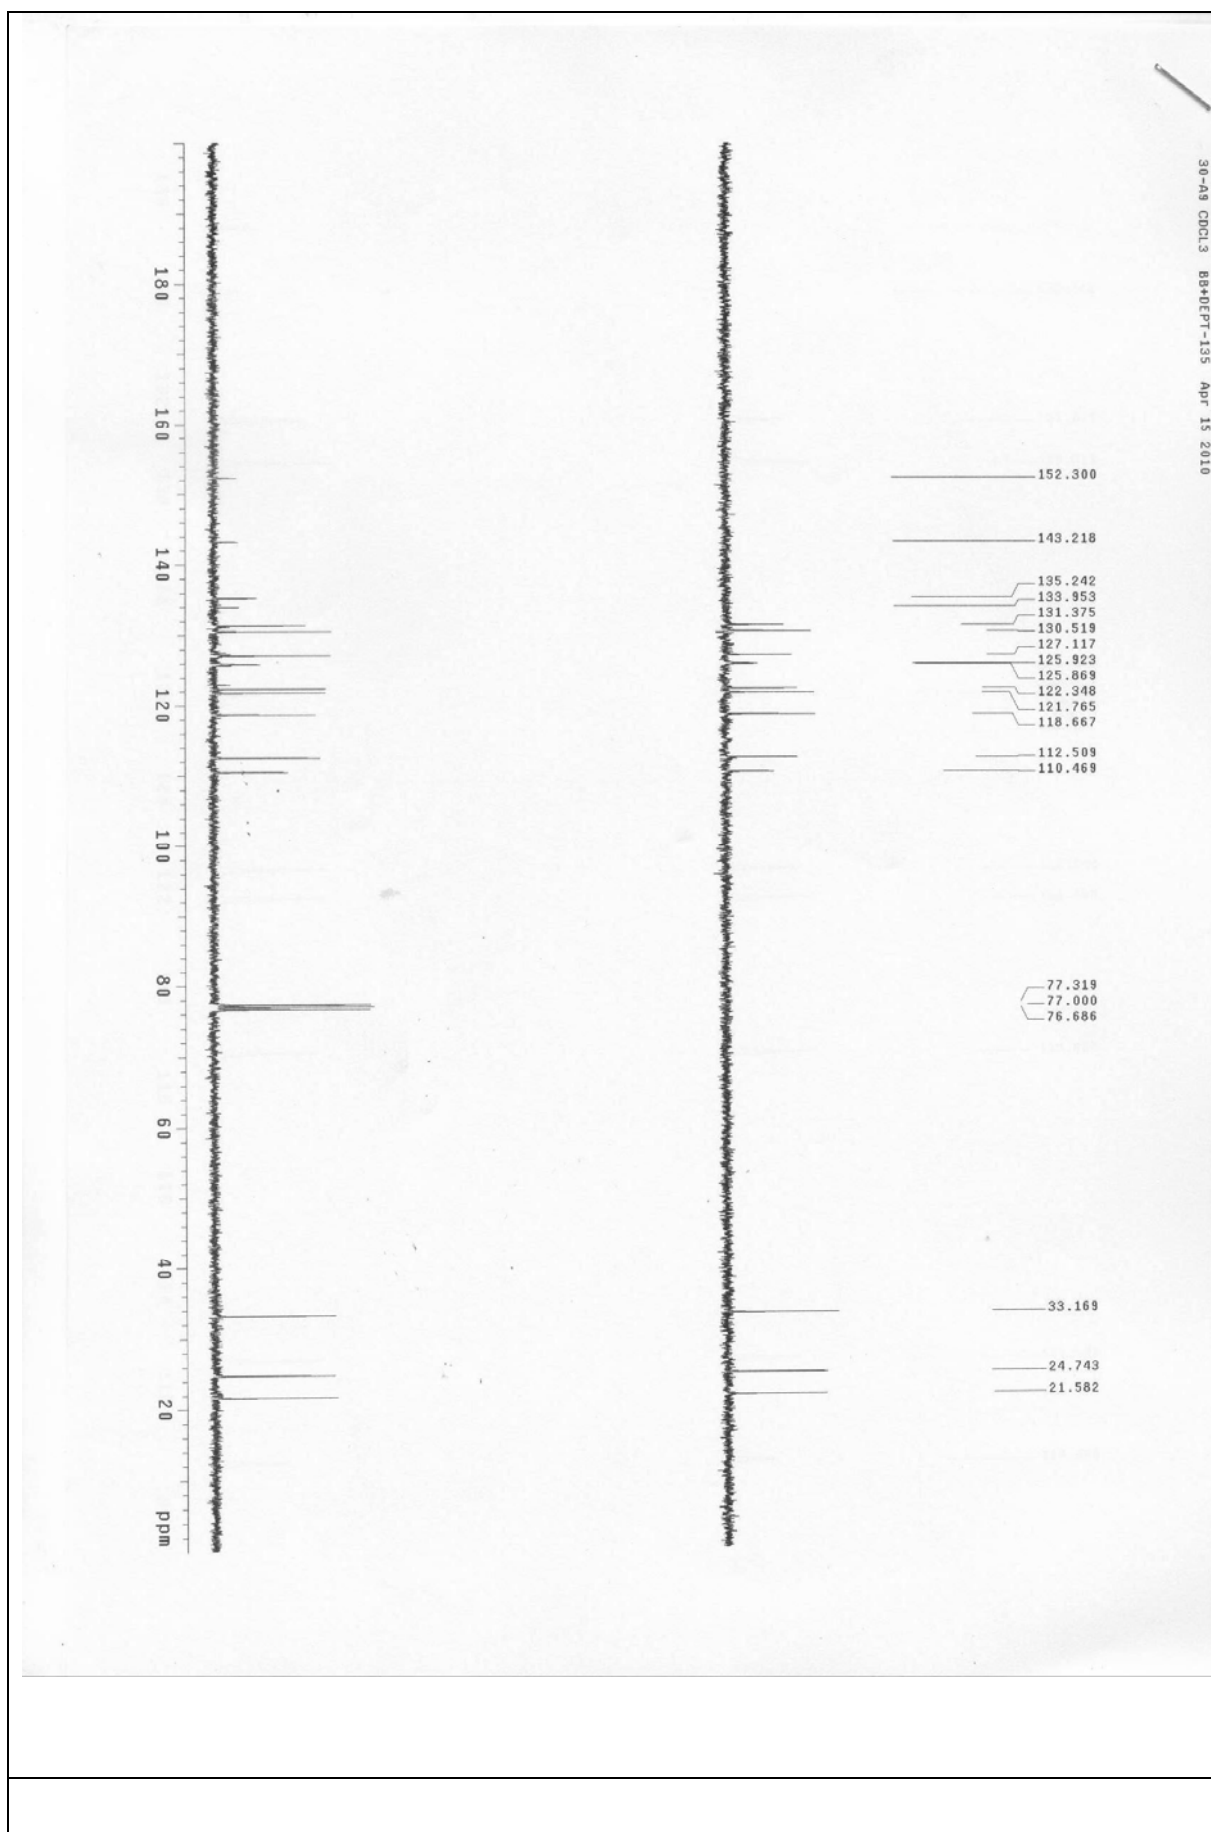

**1-[1-(3-Trifluoromethyl-phenyl)-meth-(Z)-ylidene]-1,2,3,4-tetrahydro-pyrido[1,2-*a*]benzimidazole (B9)**

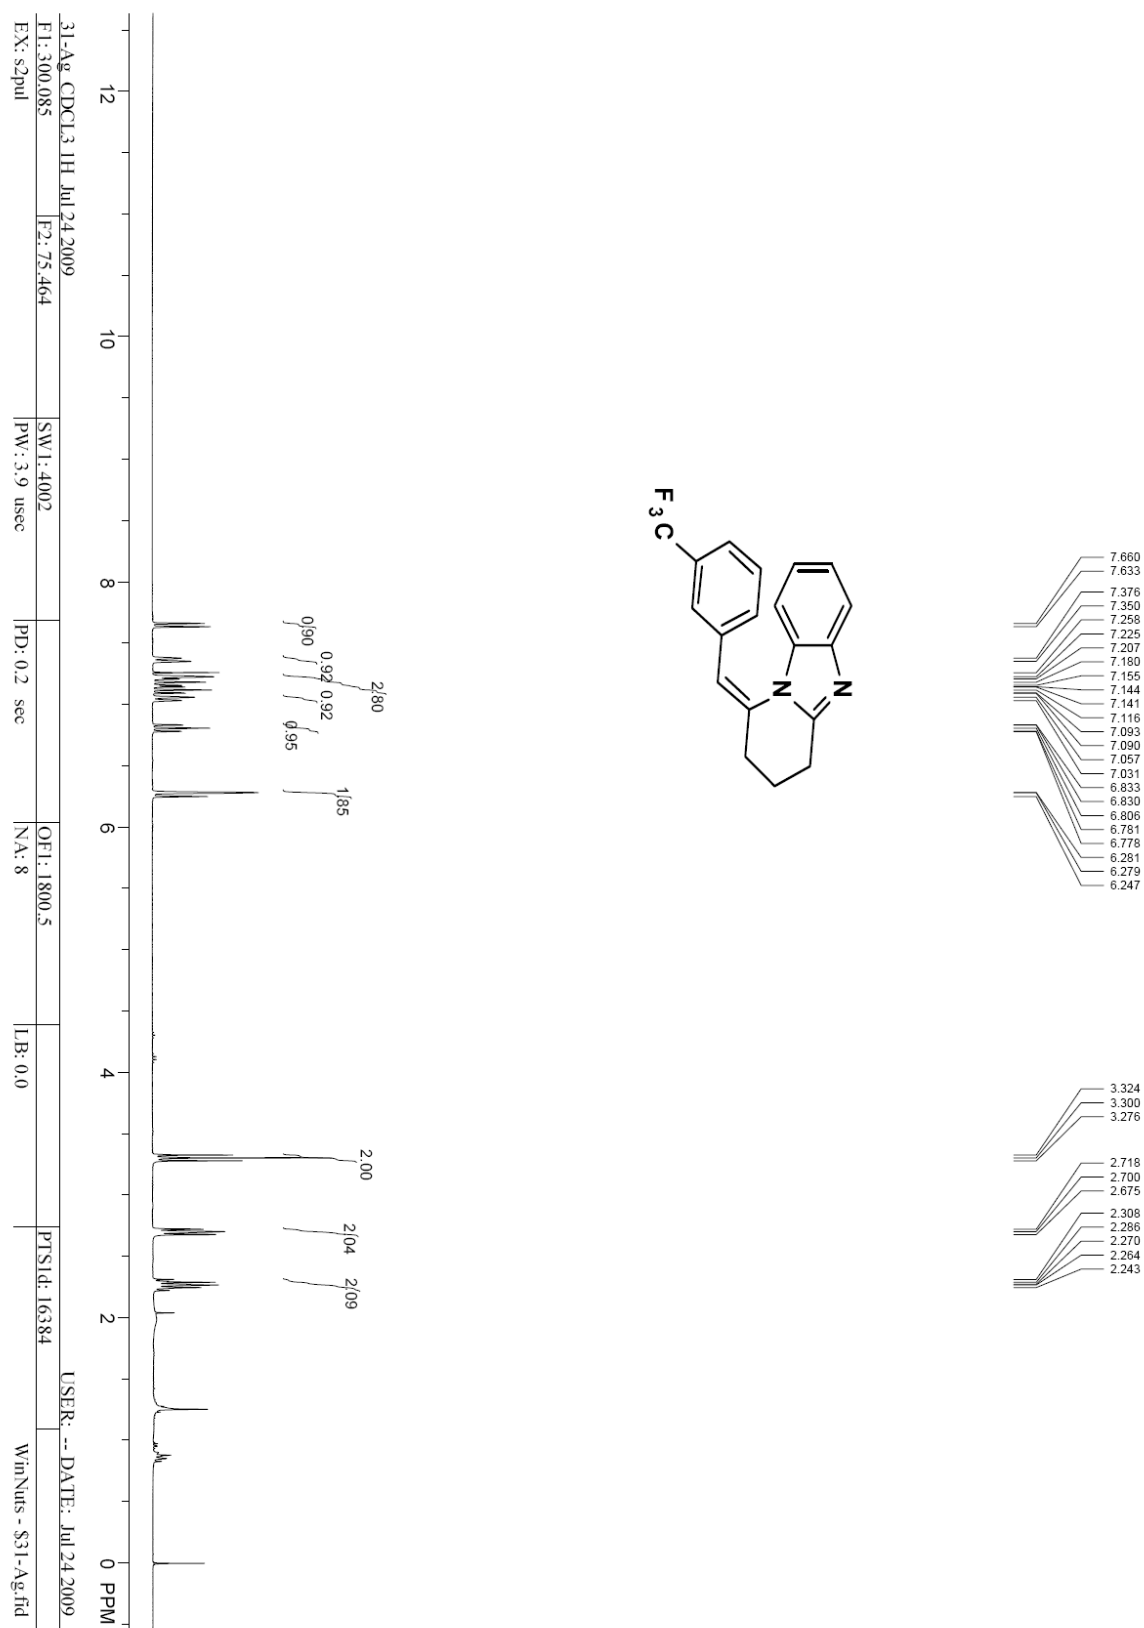

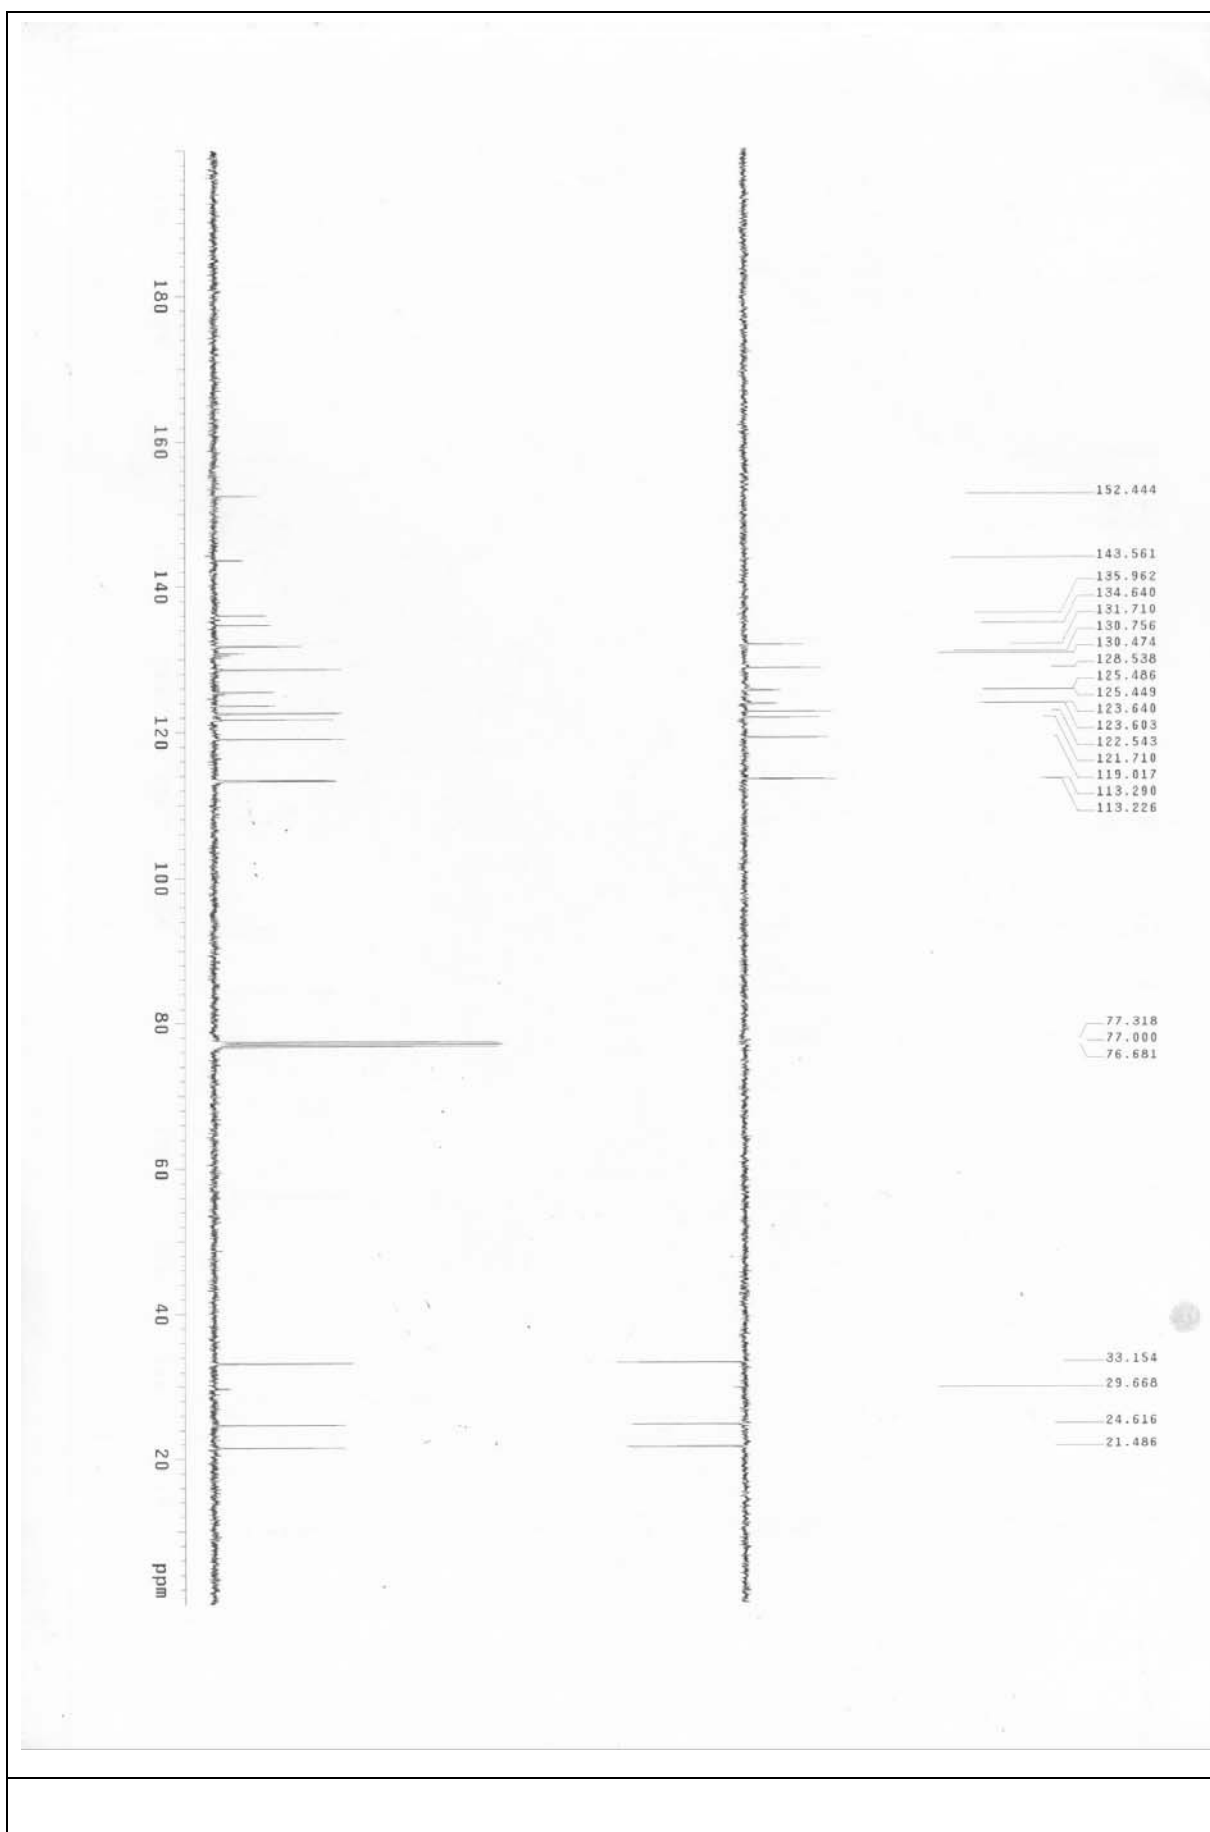

**1-[1-(4-Trifluoromethyl-phenyl)-meth-(Z)-ylidene]-1,2,3,4-tetrahydro-pyrido[1,2-*a*]benzimidazole (B10)**

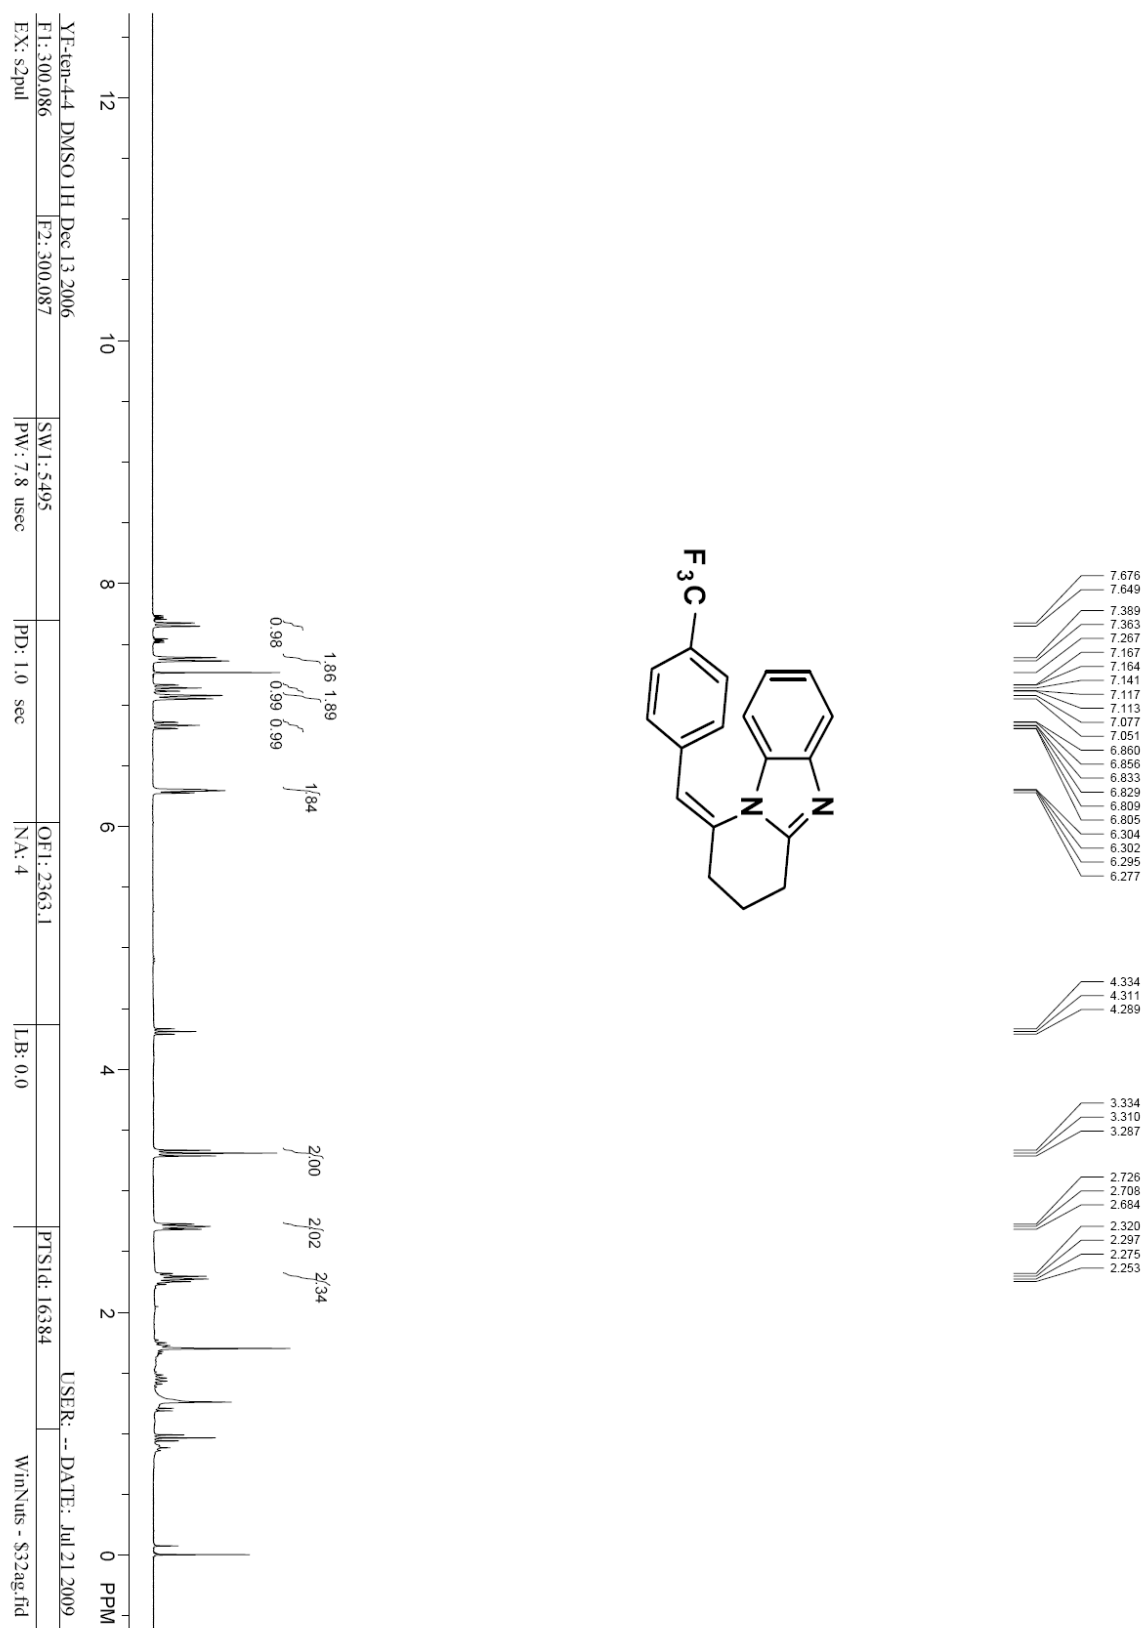

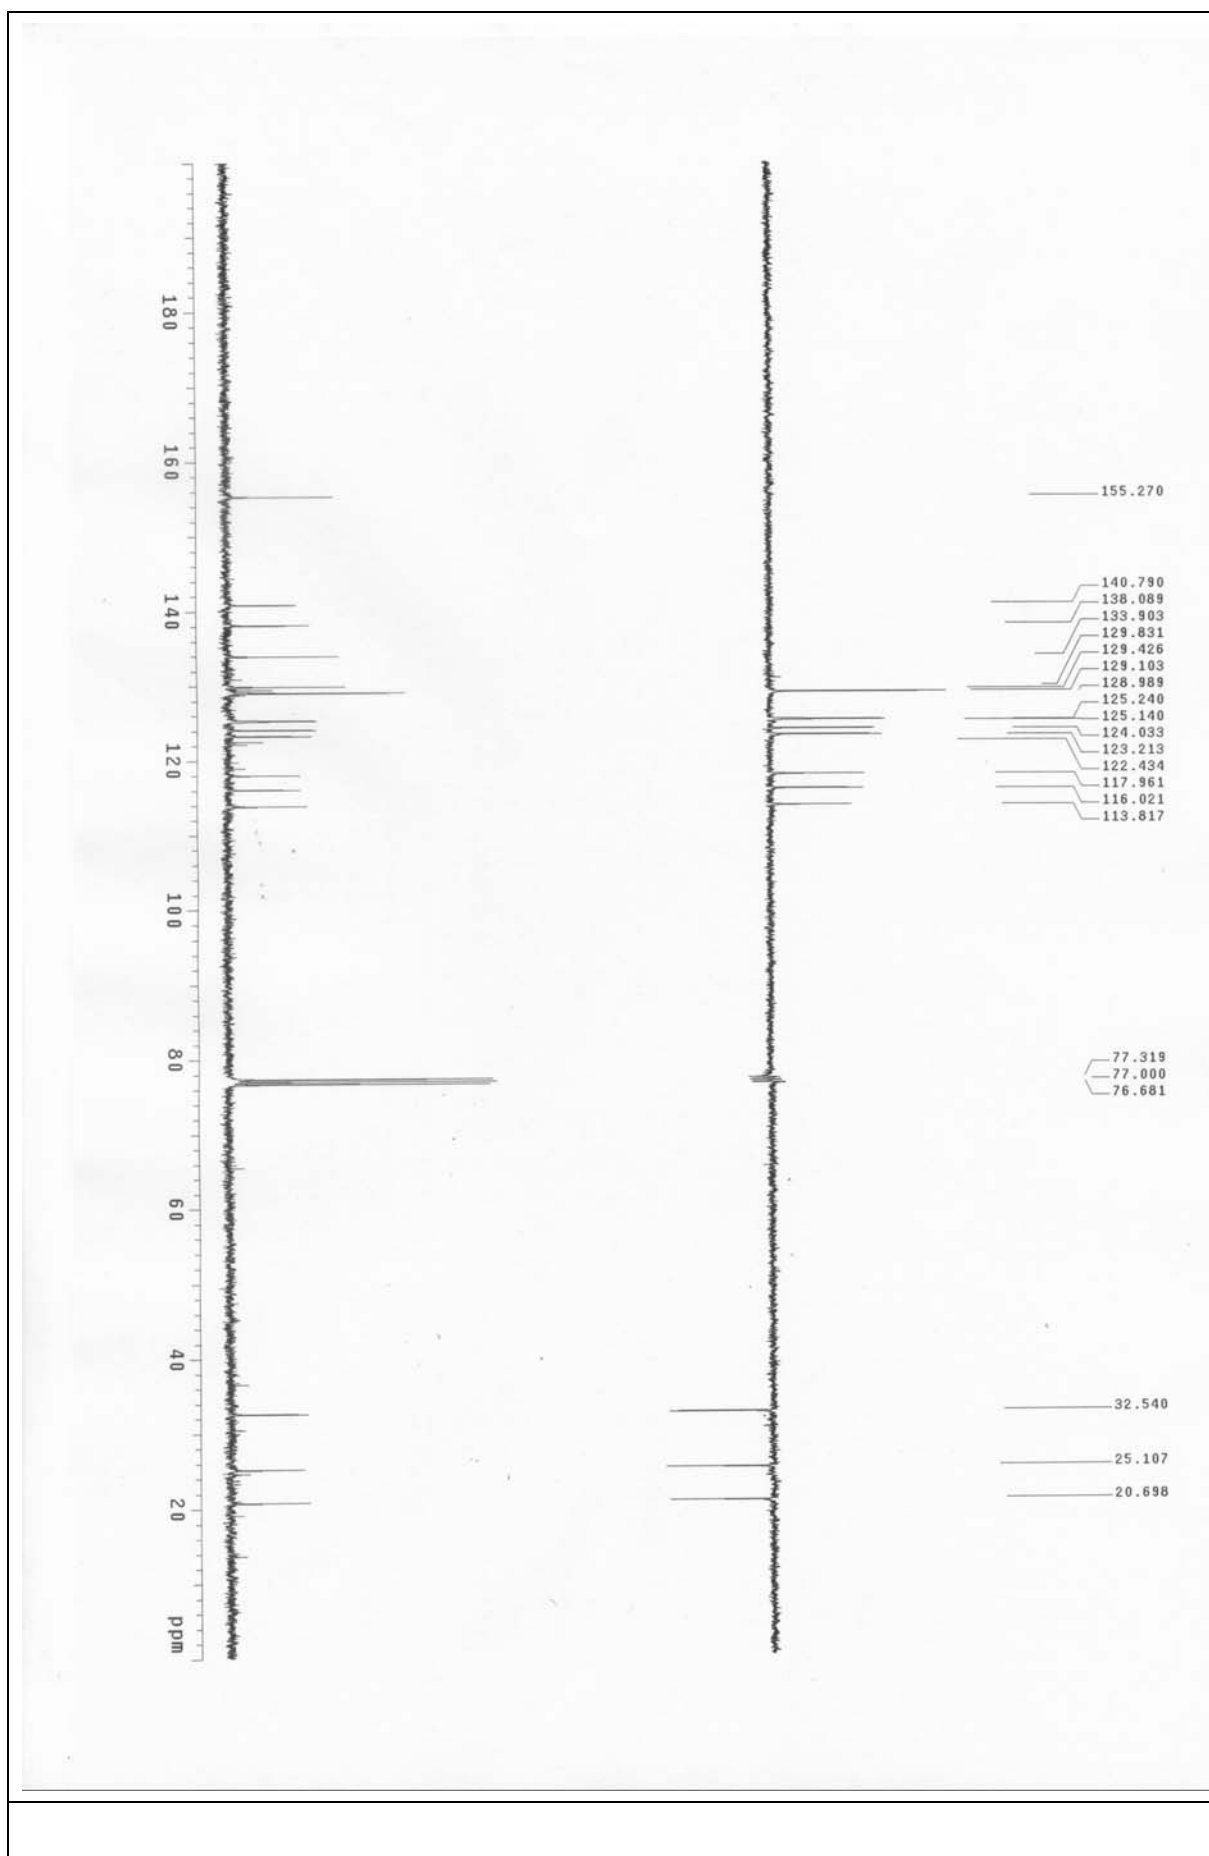

**1-[1-(4-Chloro-phenyl)-meth-(Z)-ylidene]-1,2,3,4-tetrahydro-pyrido[1,2-*a*]benzimidazole (B11)**

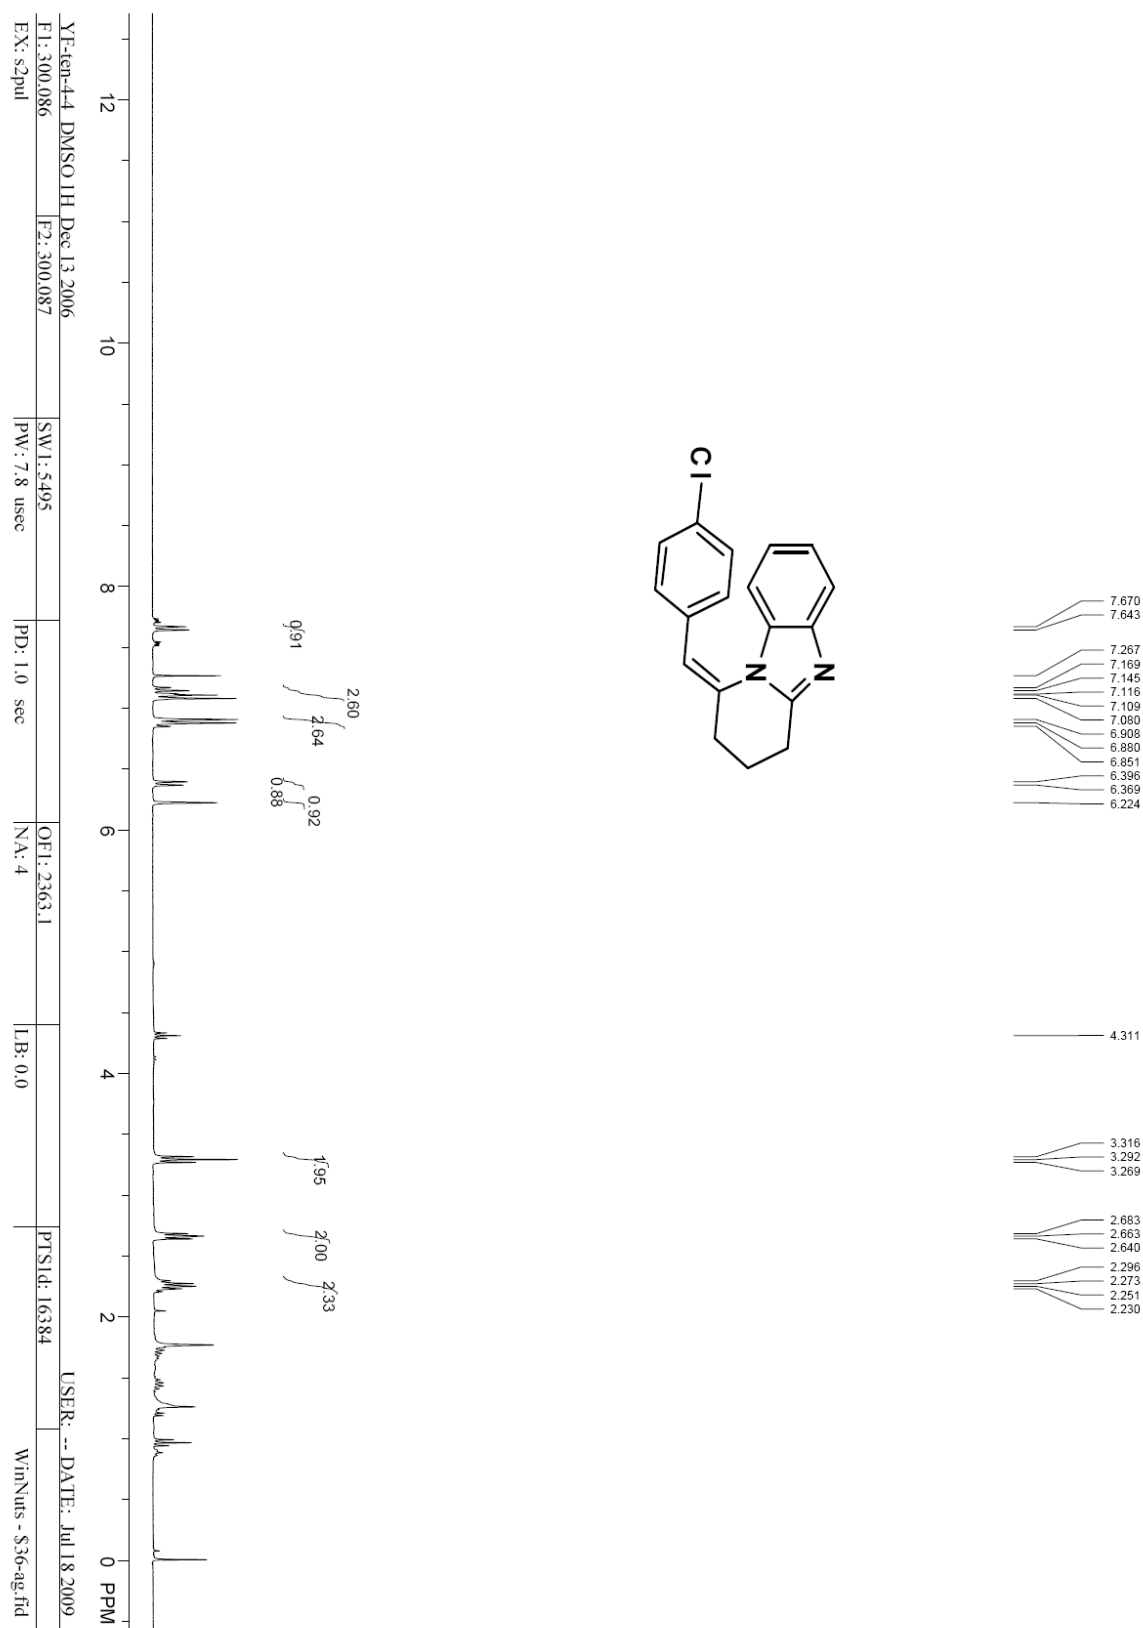

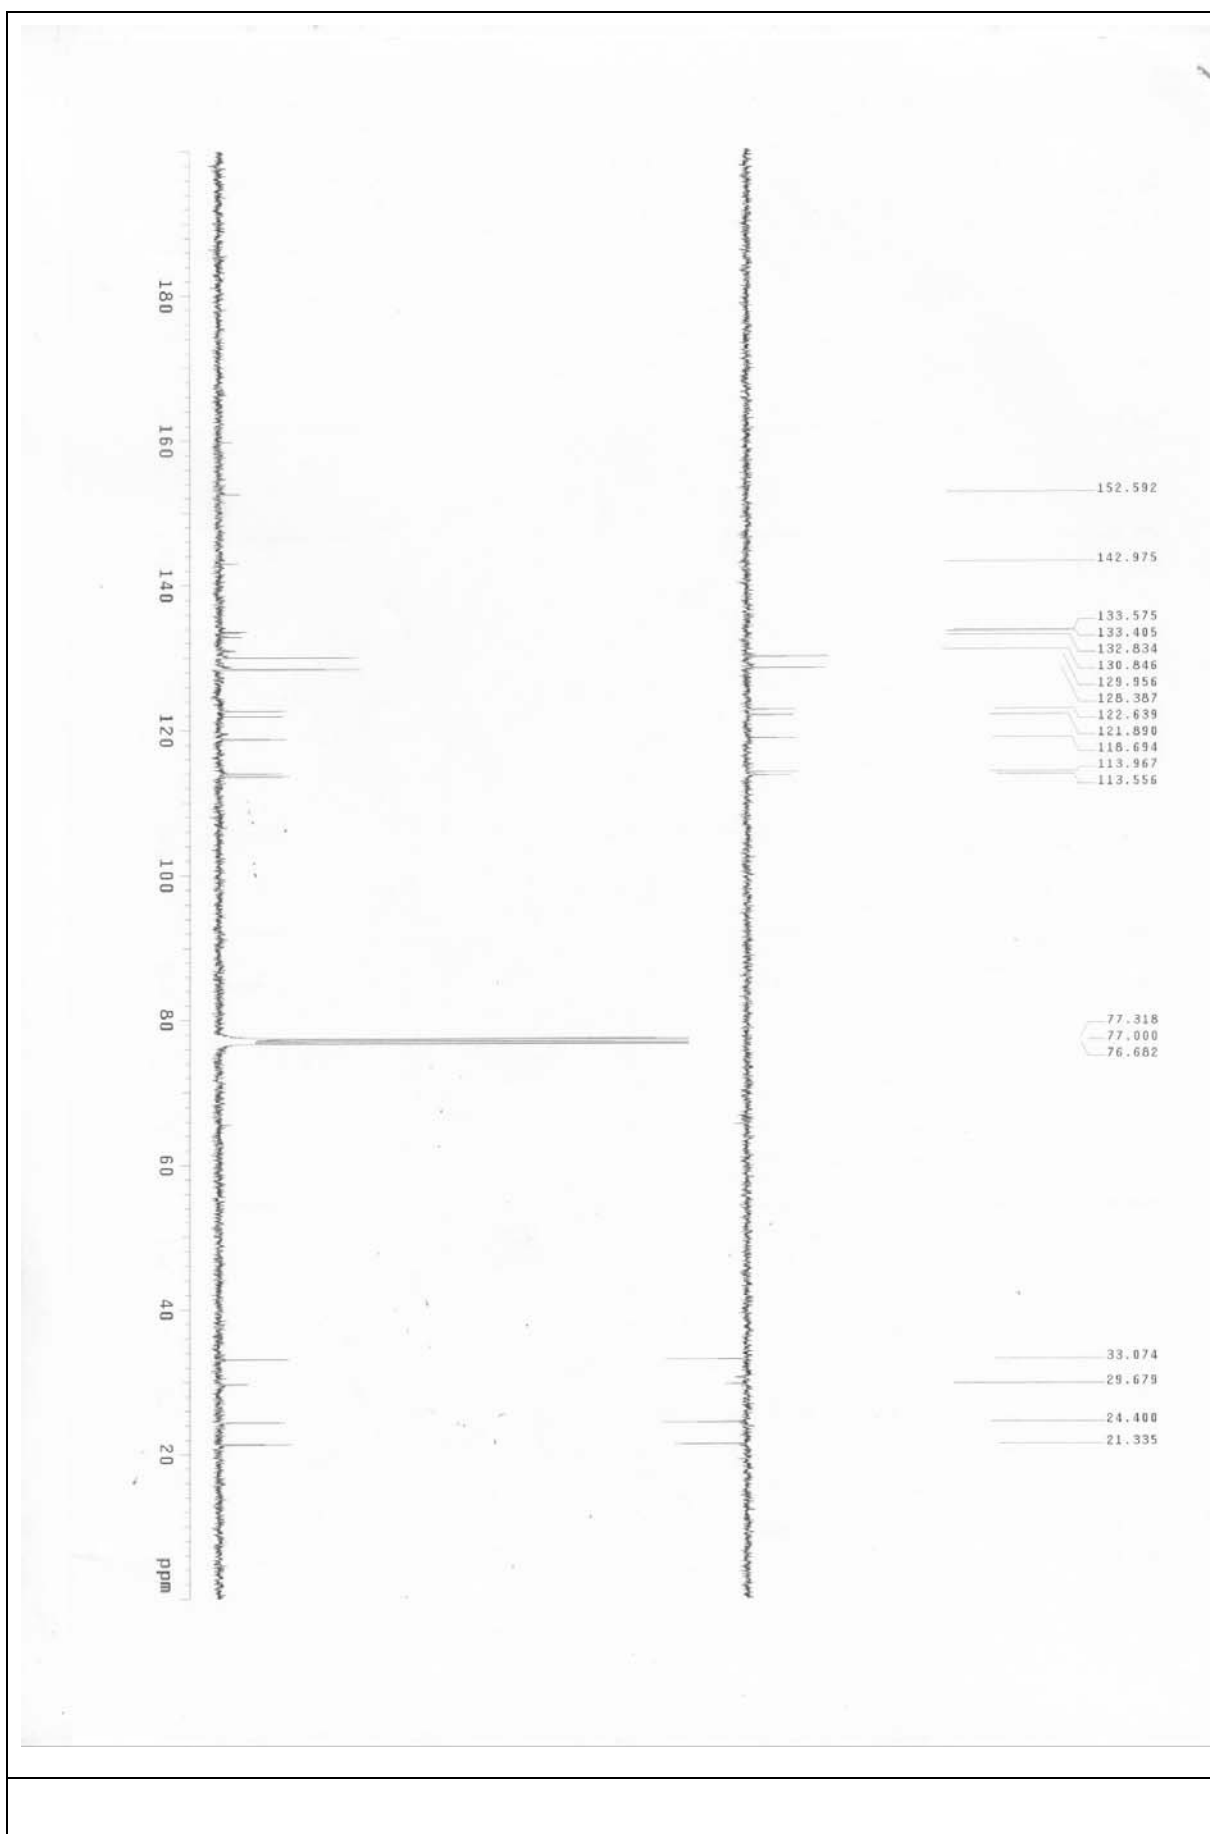



**1-[1-Pyridin-3-yl-meth-(Z)-ylidene]-1,2,3,4-tetrahydro-pyrido[1,2-*a*]benzimidazole  
(B12)**

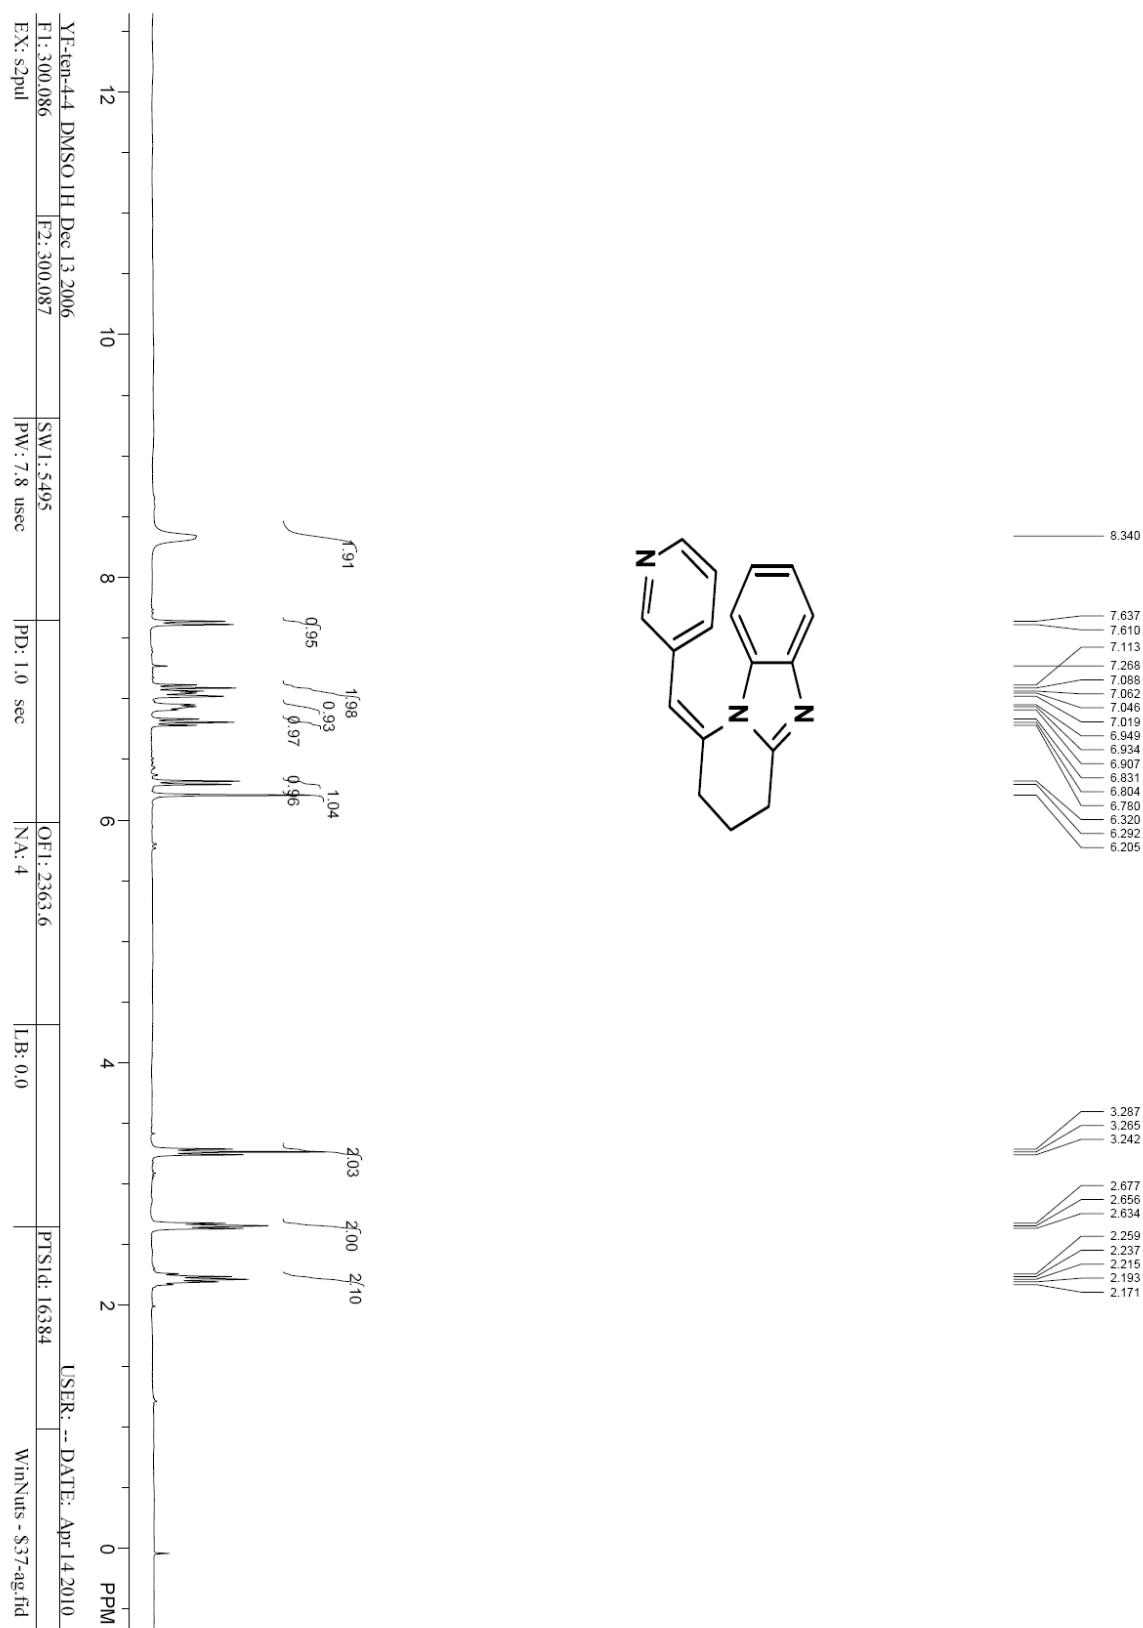

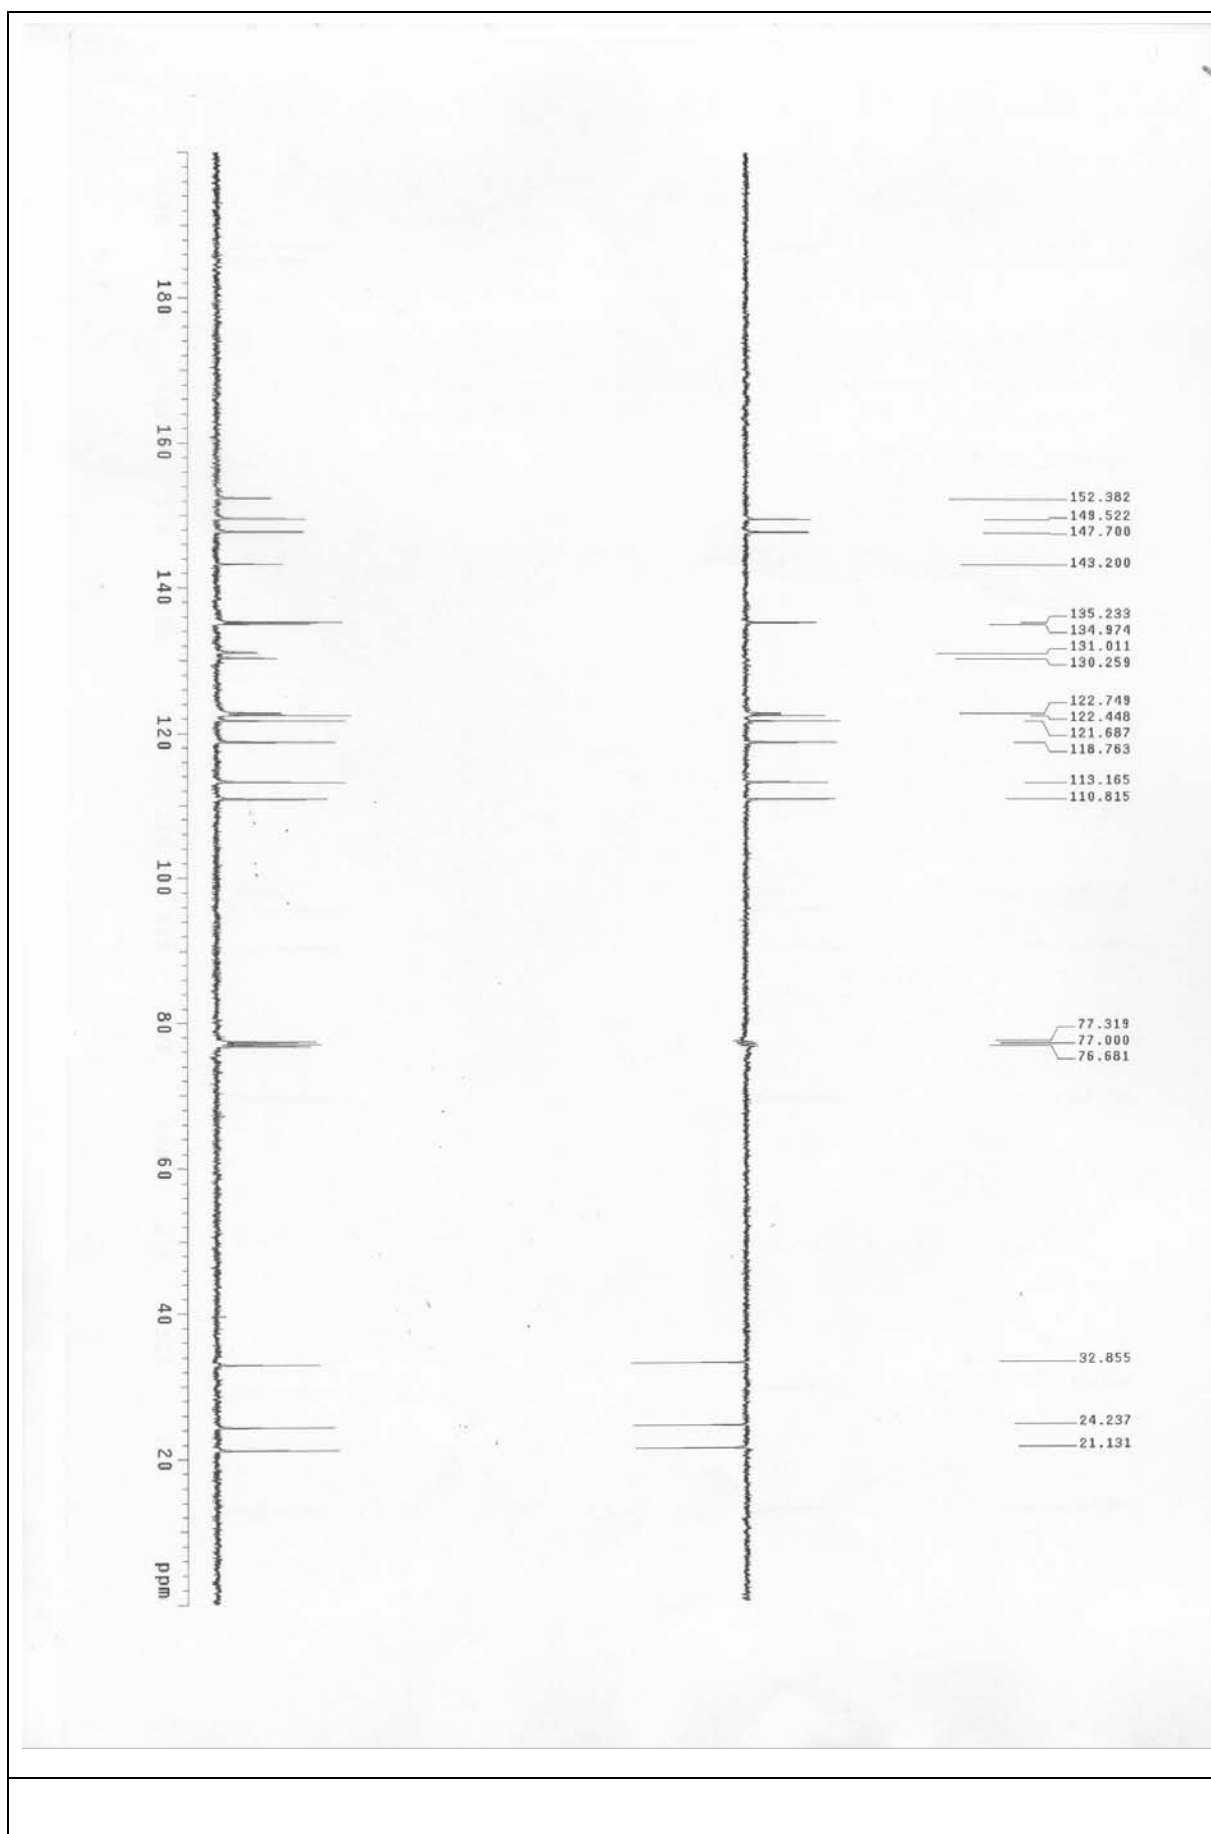

# 1-Methylene-1,2,3,4-tetrahydro-naphth[2',3':4,5]imidazo[1,2-a]pyridine (B13)

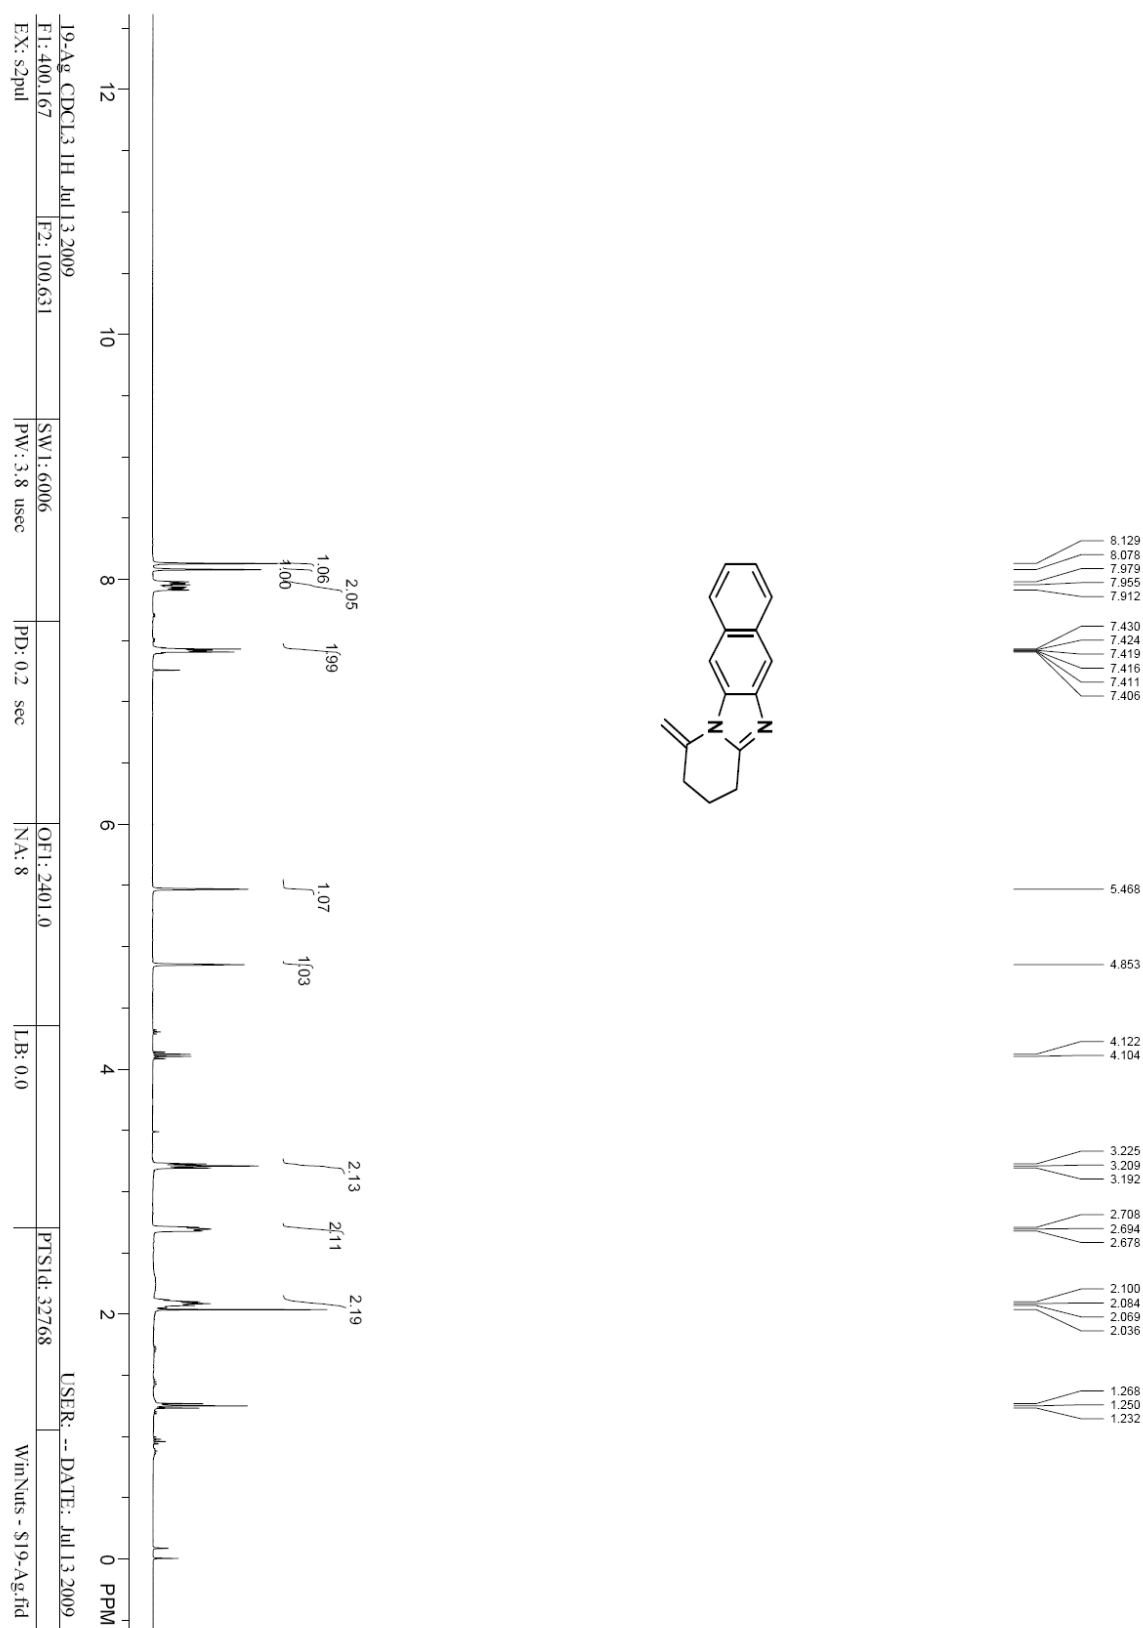

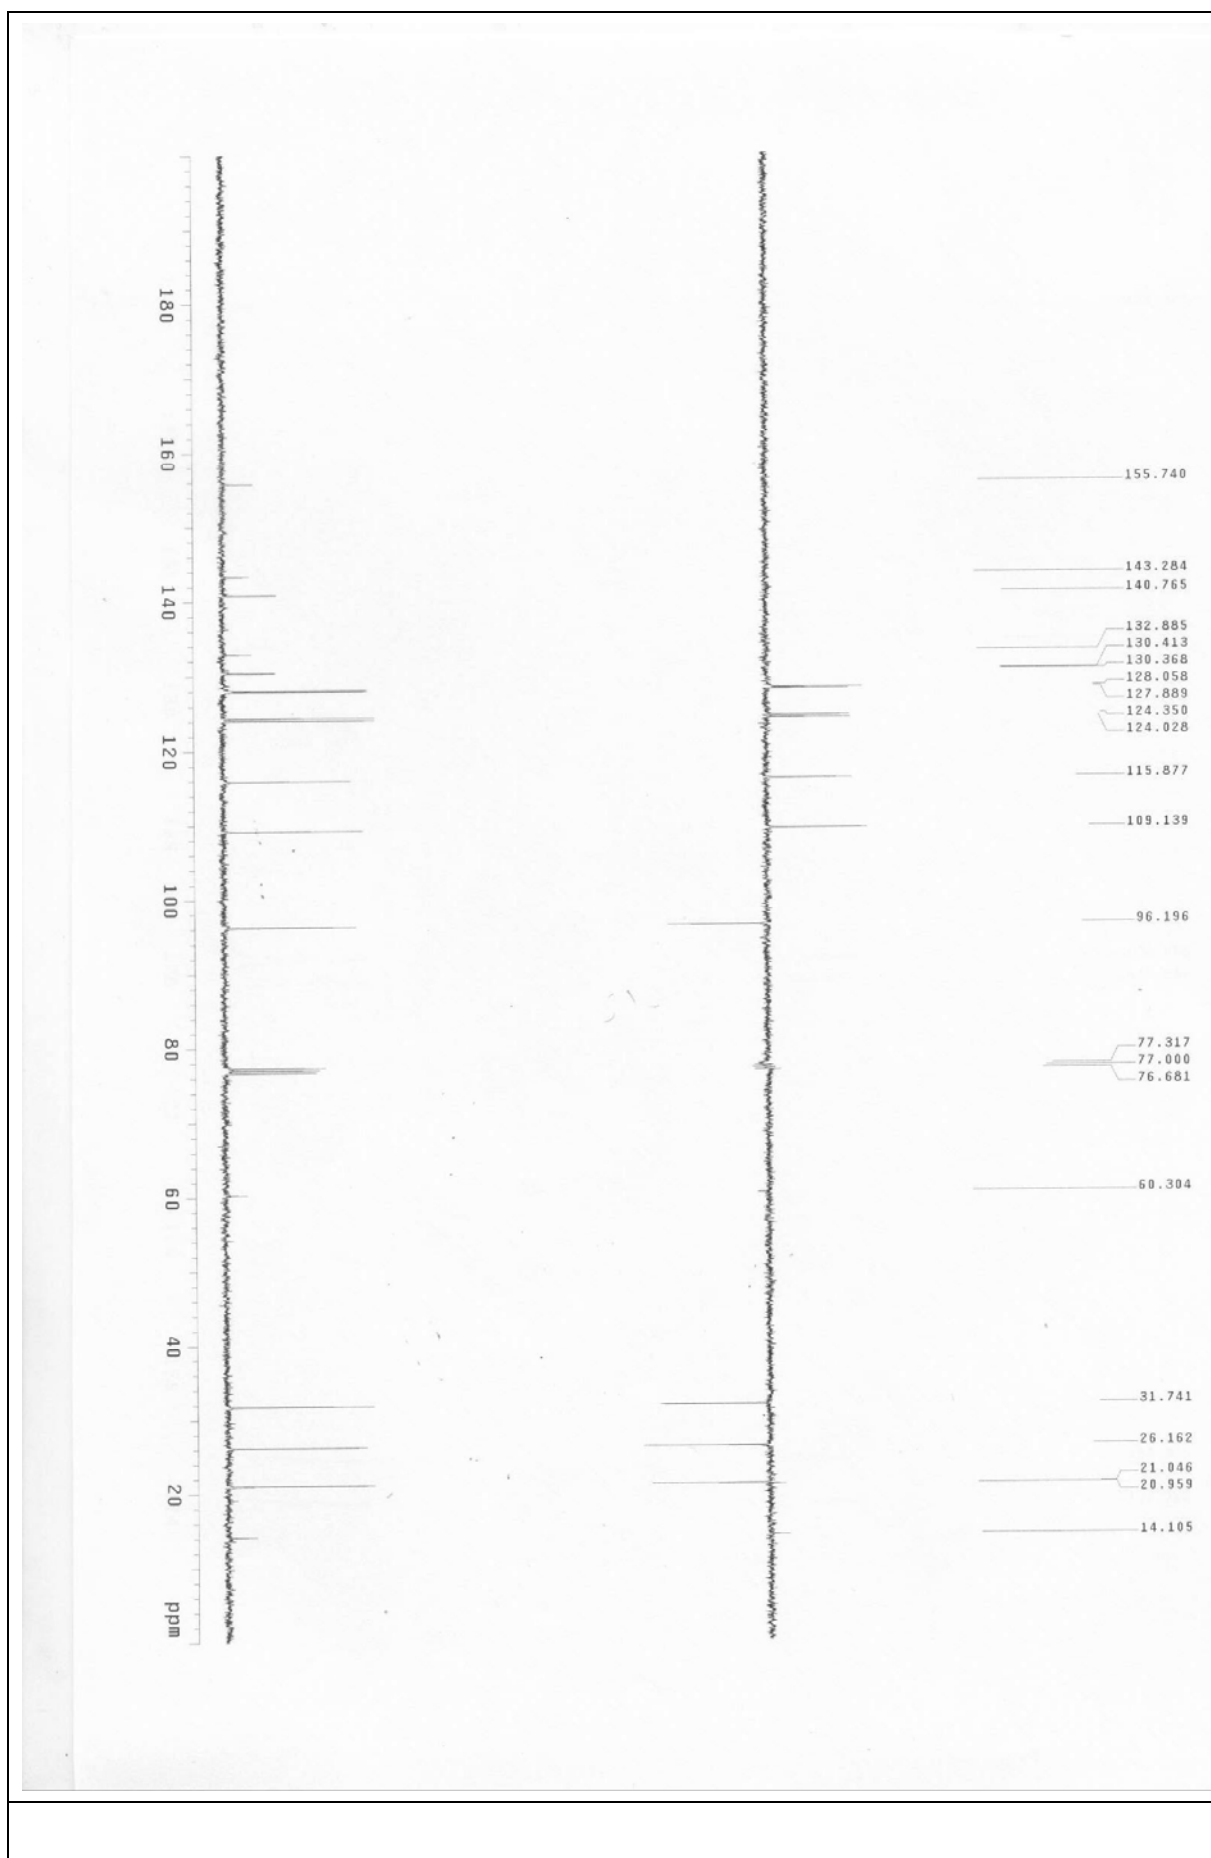

**1-[1-Phenyl-meth-(Z)-ylidene]-1,2,3,4-tetrahydro-naphth[2',3':4,5]imidazo[1,2-a]pyridine (B14)**

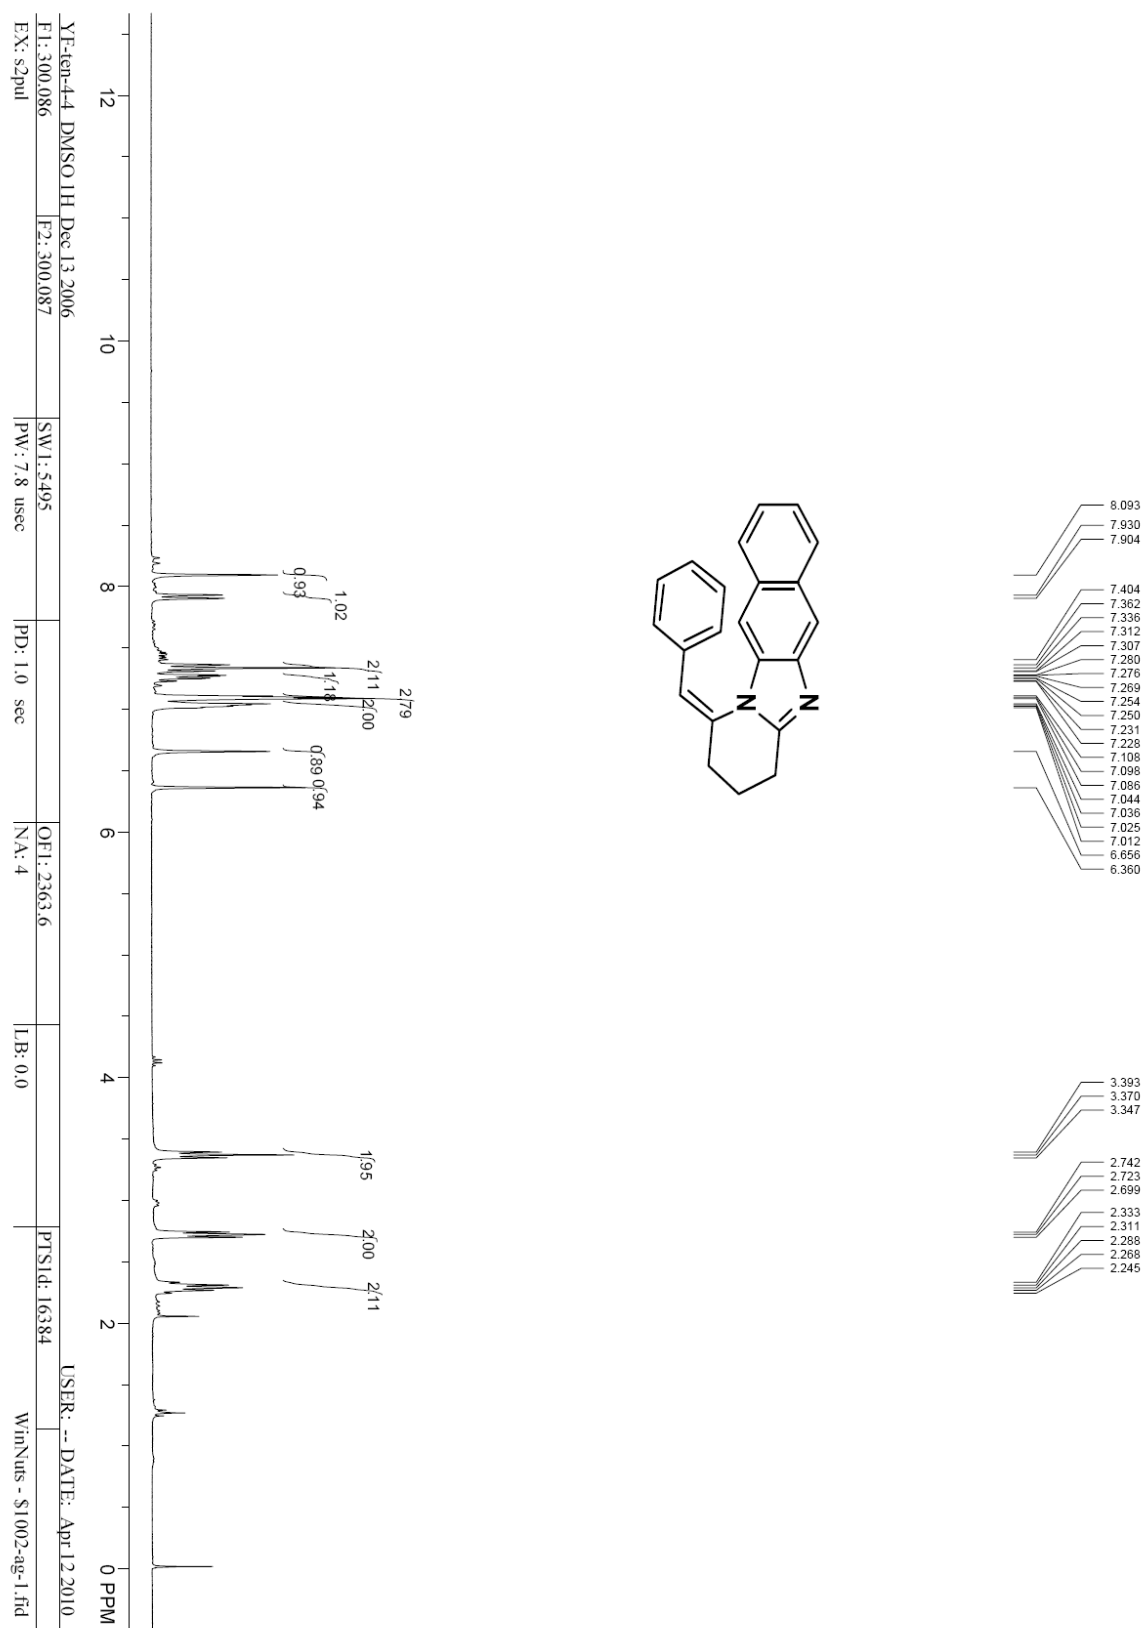

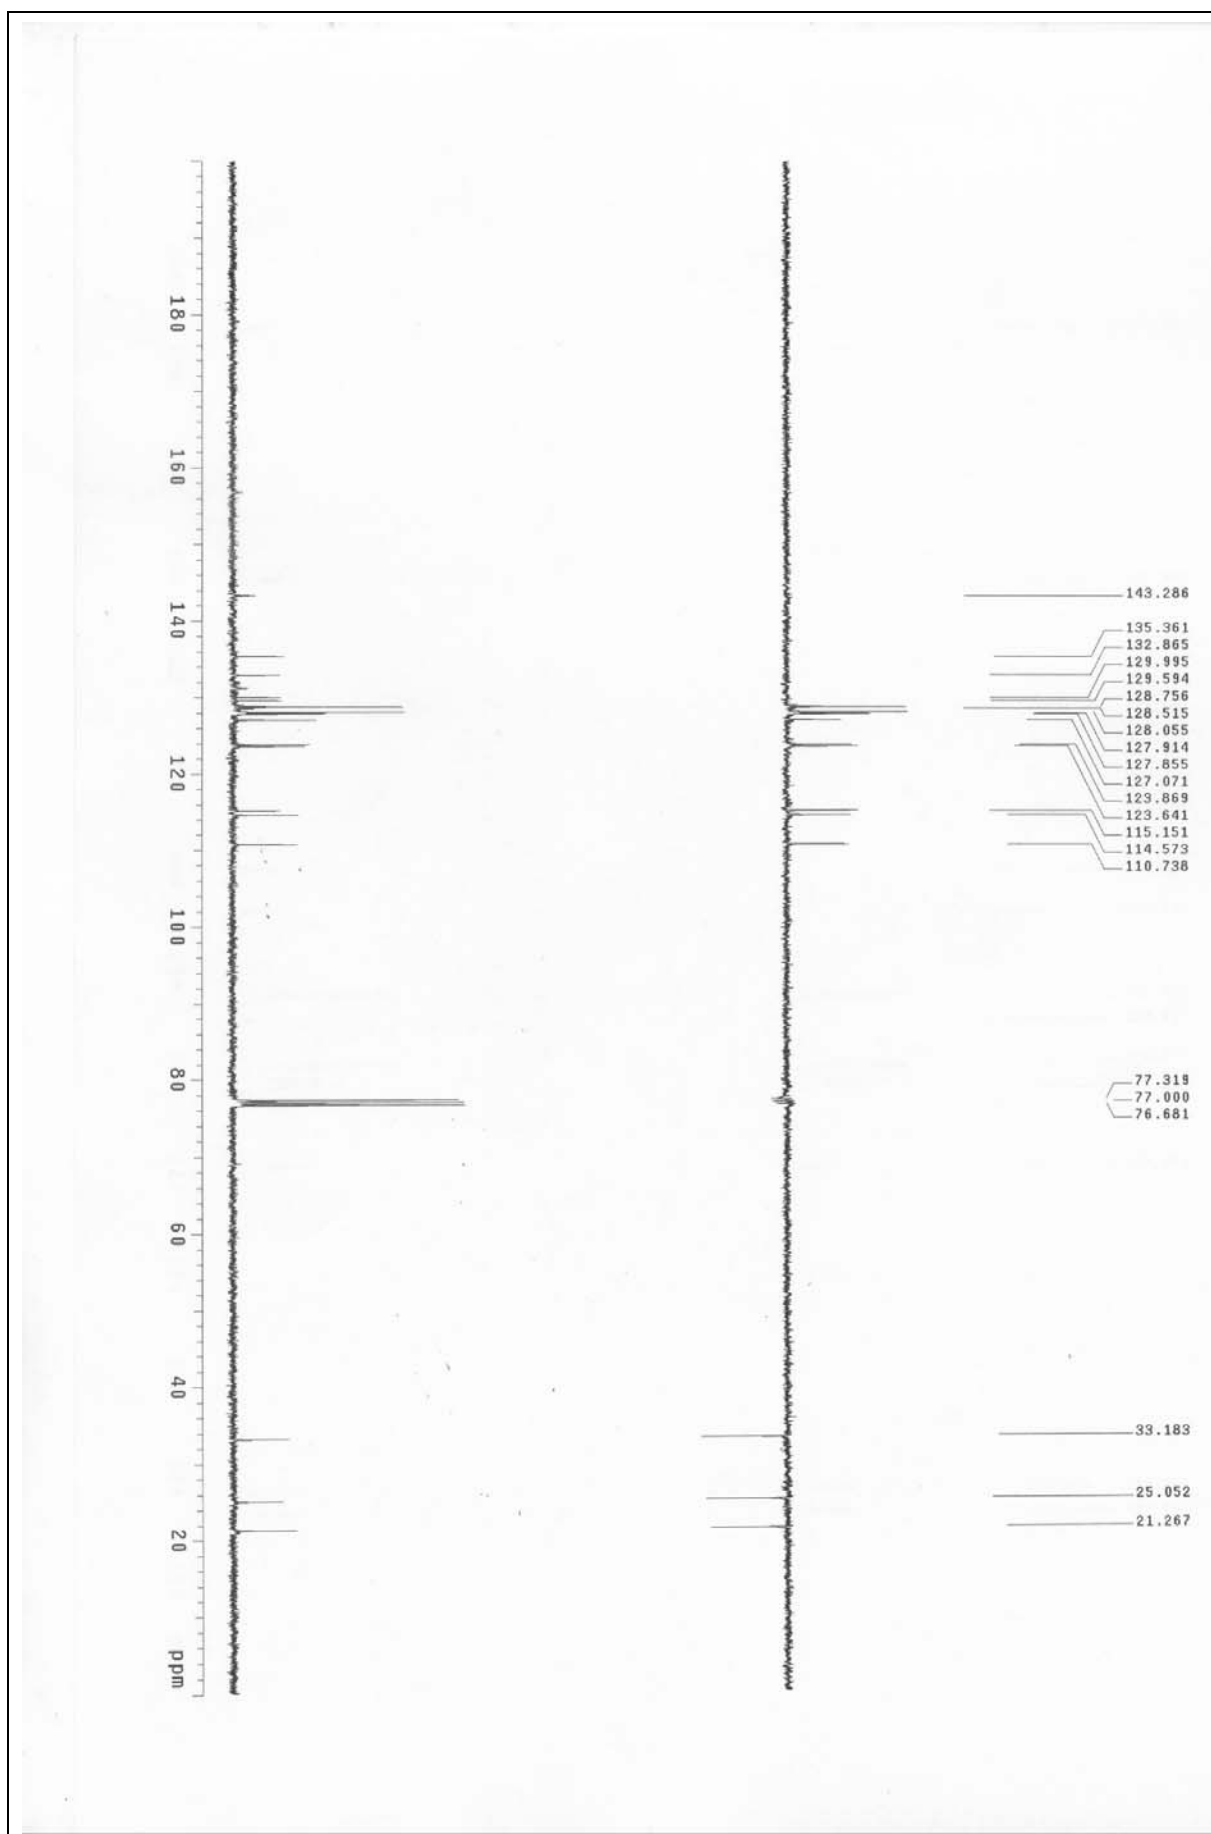

**7H,9H-8-Oxa-4b,10-diaza-benz[a]azulene (C17)**

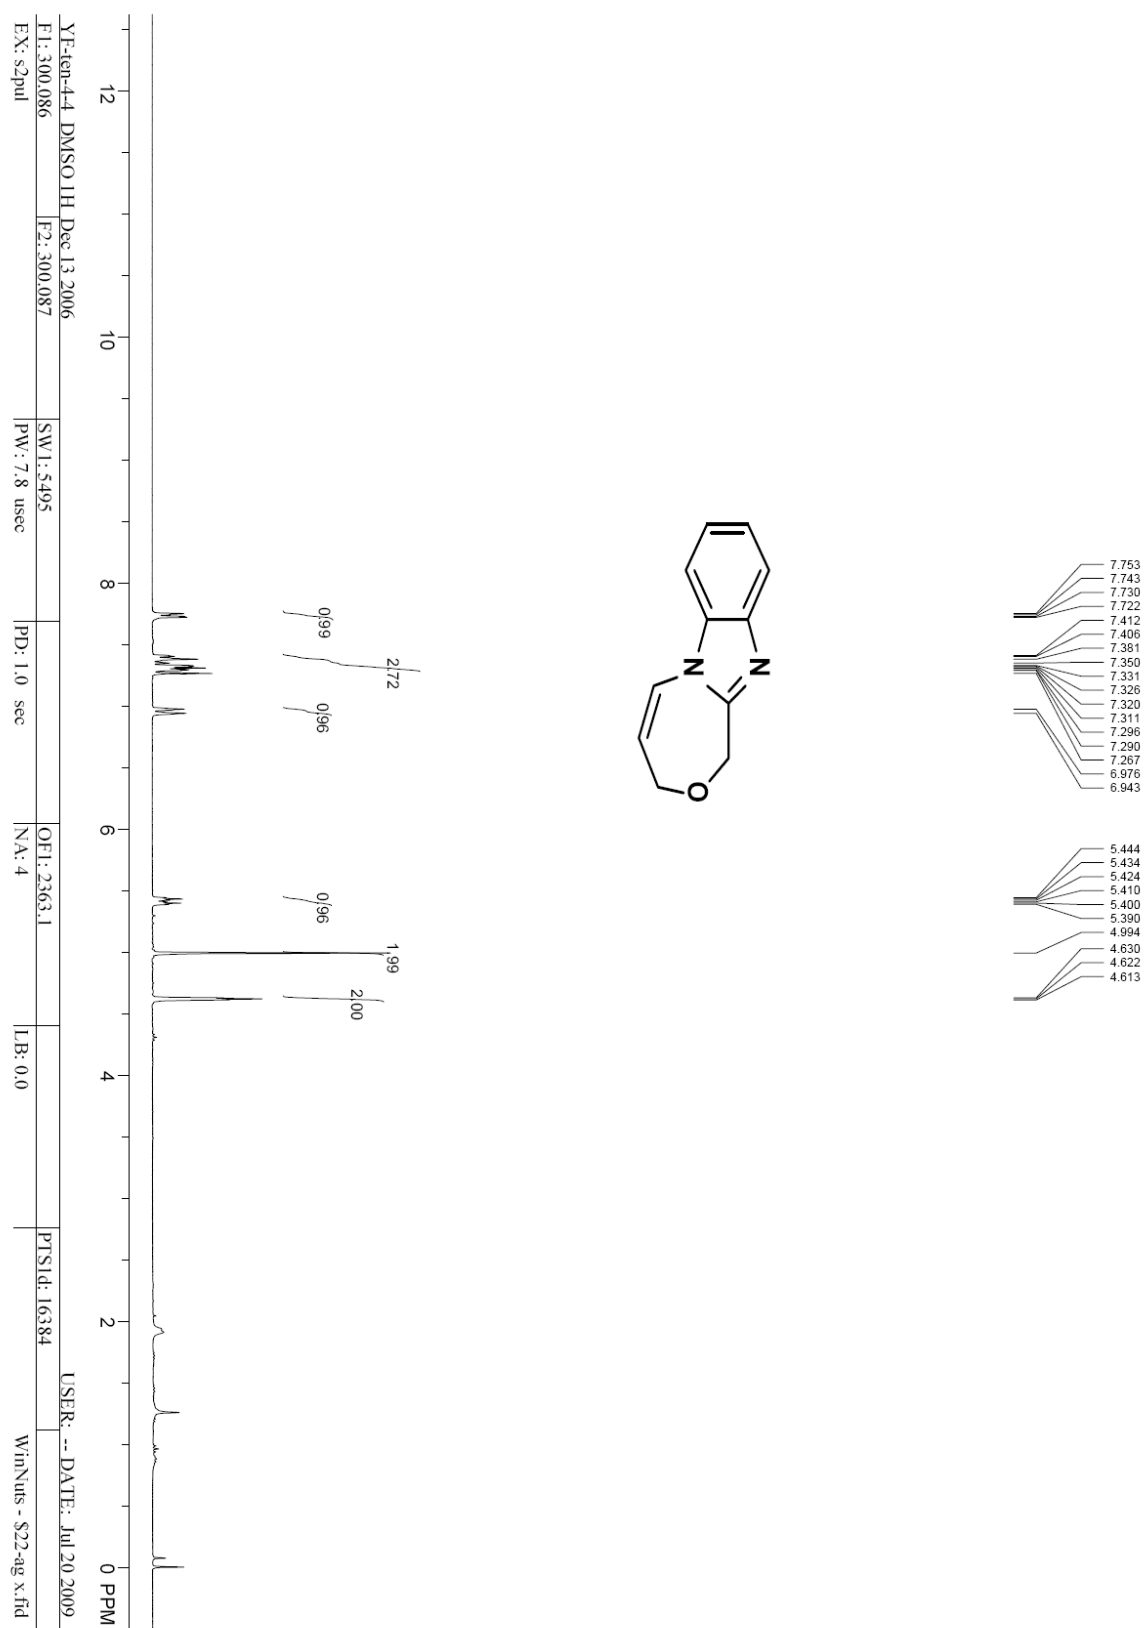

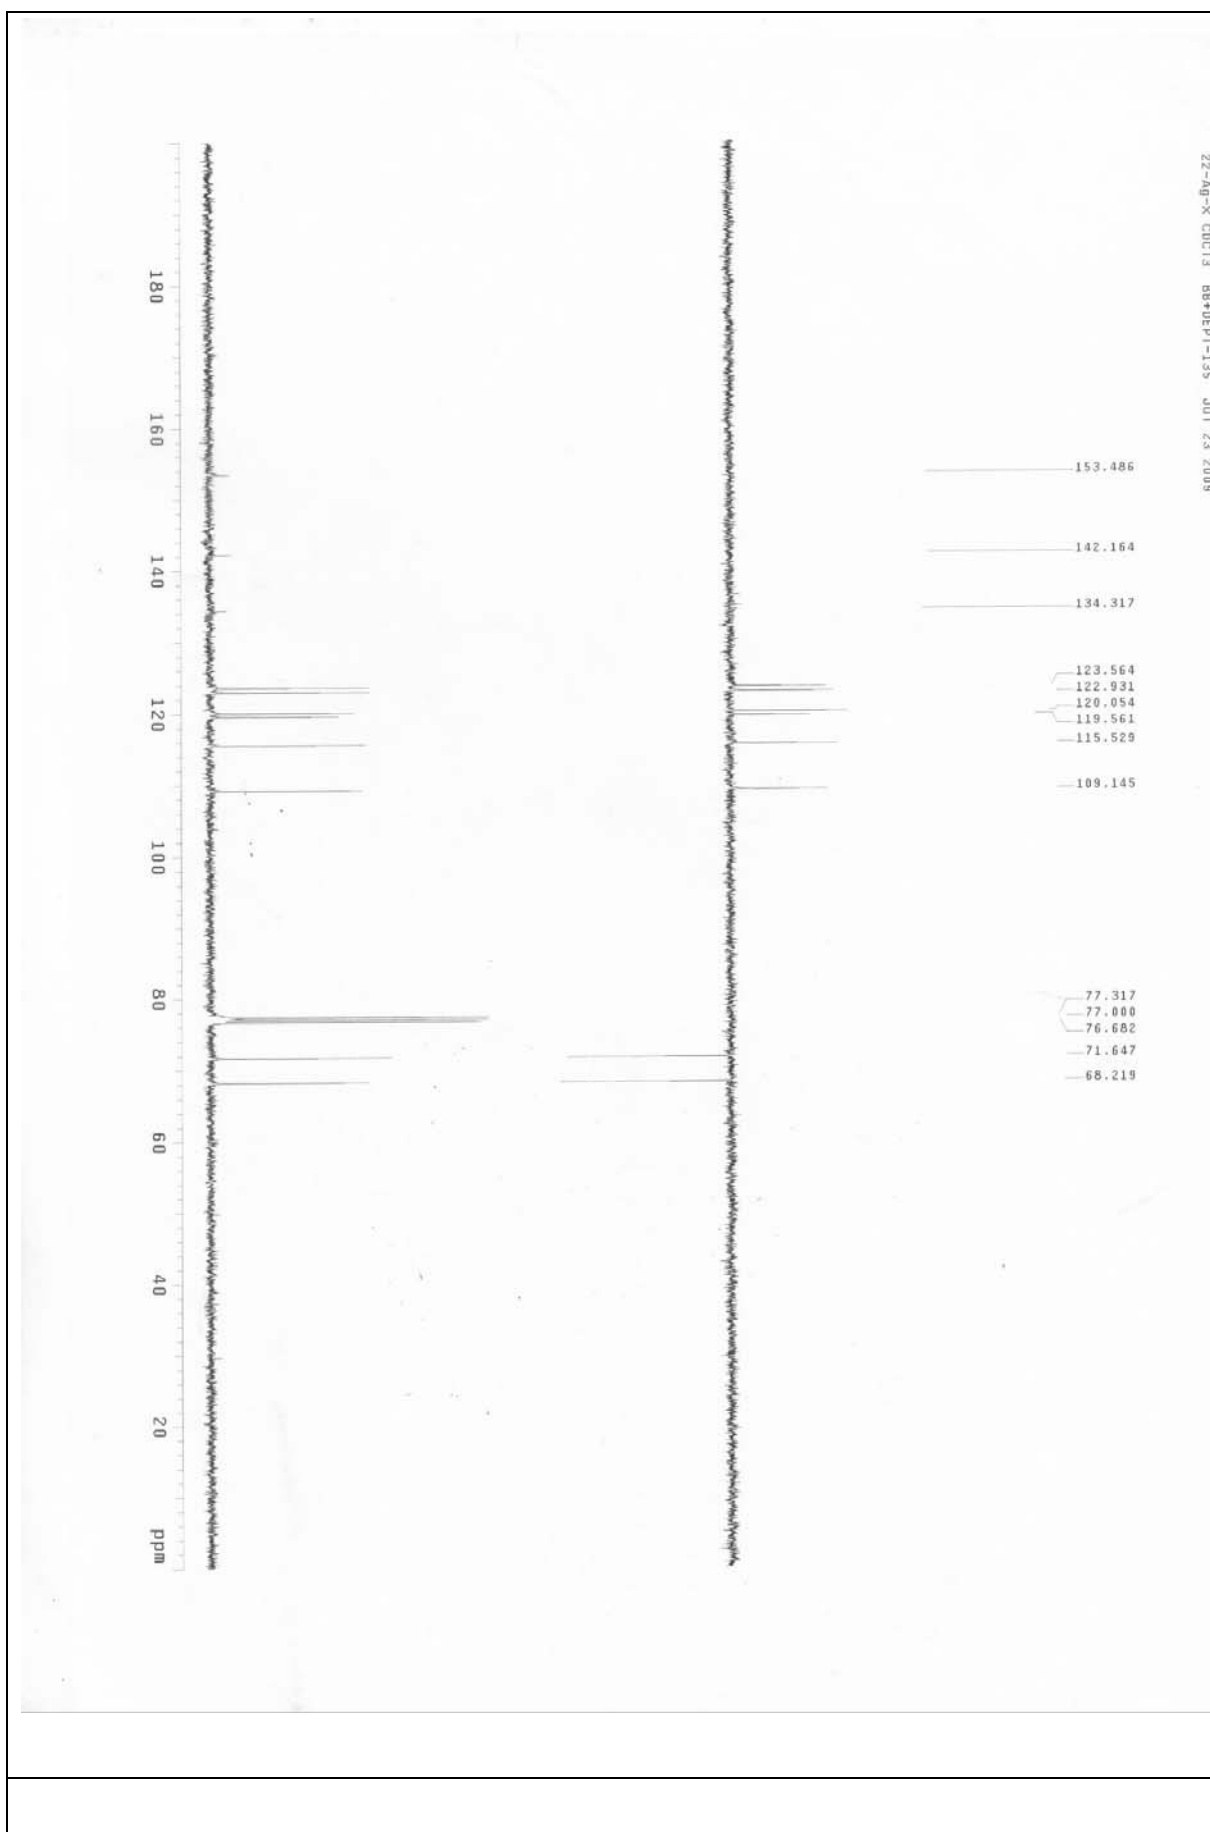



# 2,3-Dimethyl-7*H*,9*H*-8-oxa-4*b*,10-diaza-benz[*a*]azulene (C18)

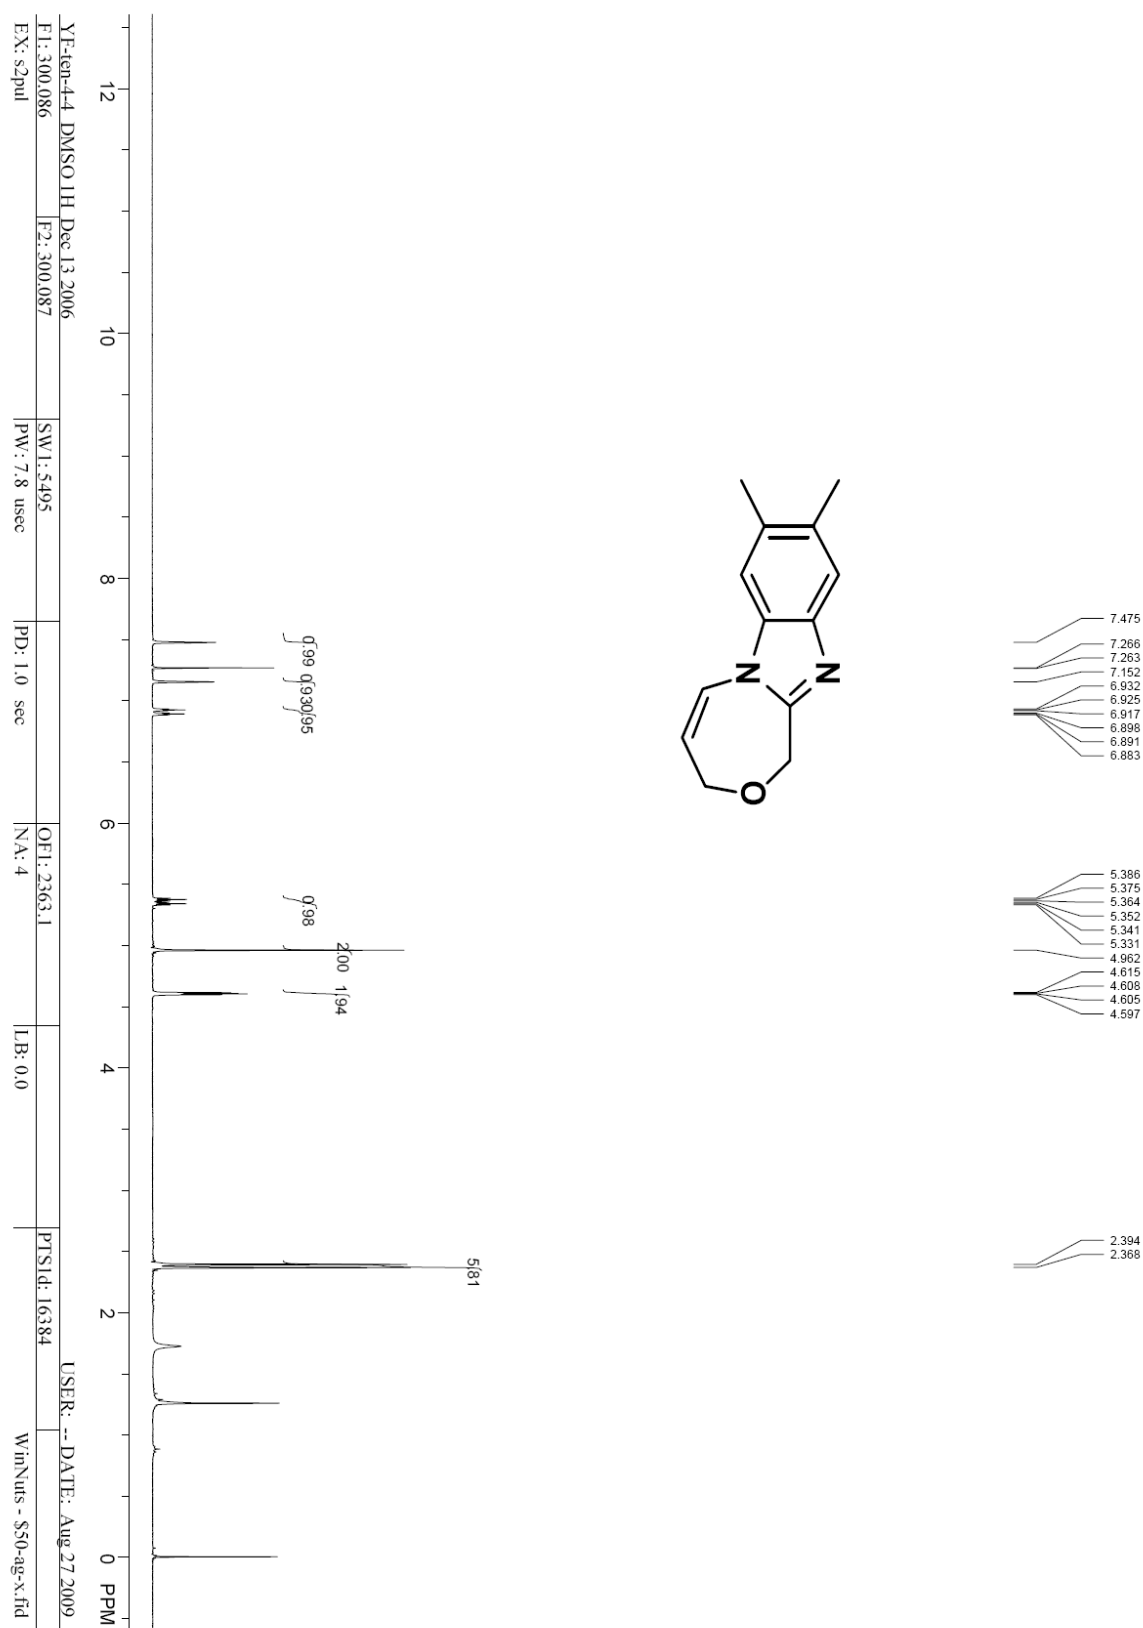

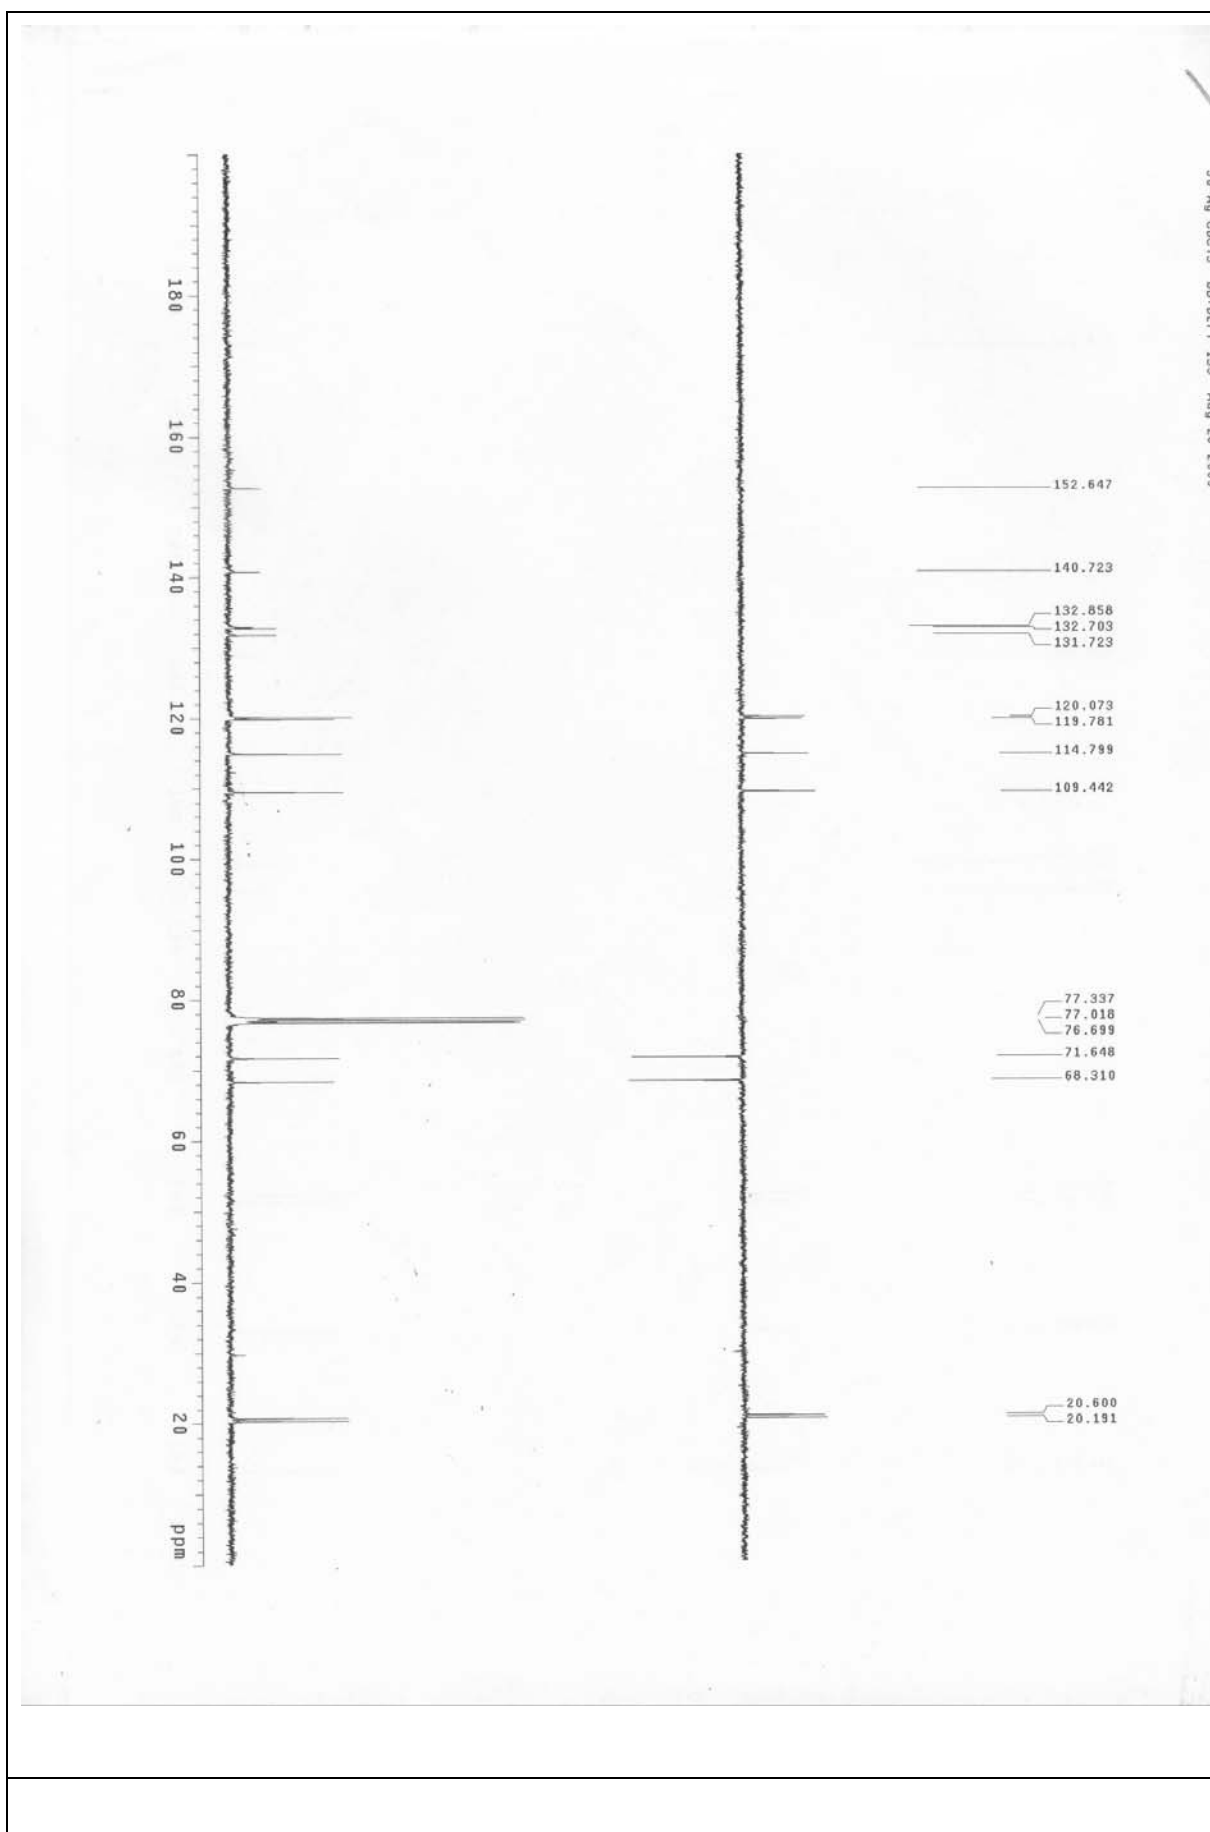

# **2,3-Dichloro-7H,9H-8-oxa-4b,10-diaza-benz[a]azulene (C19)**

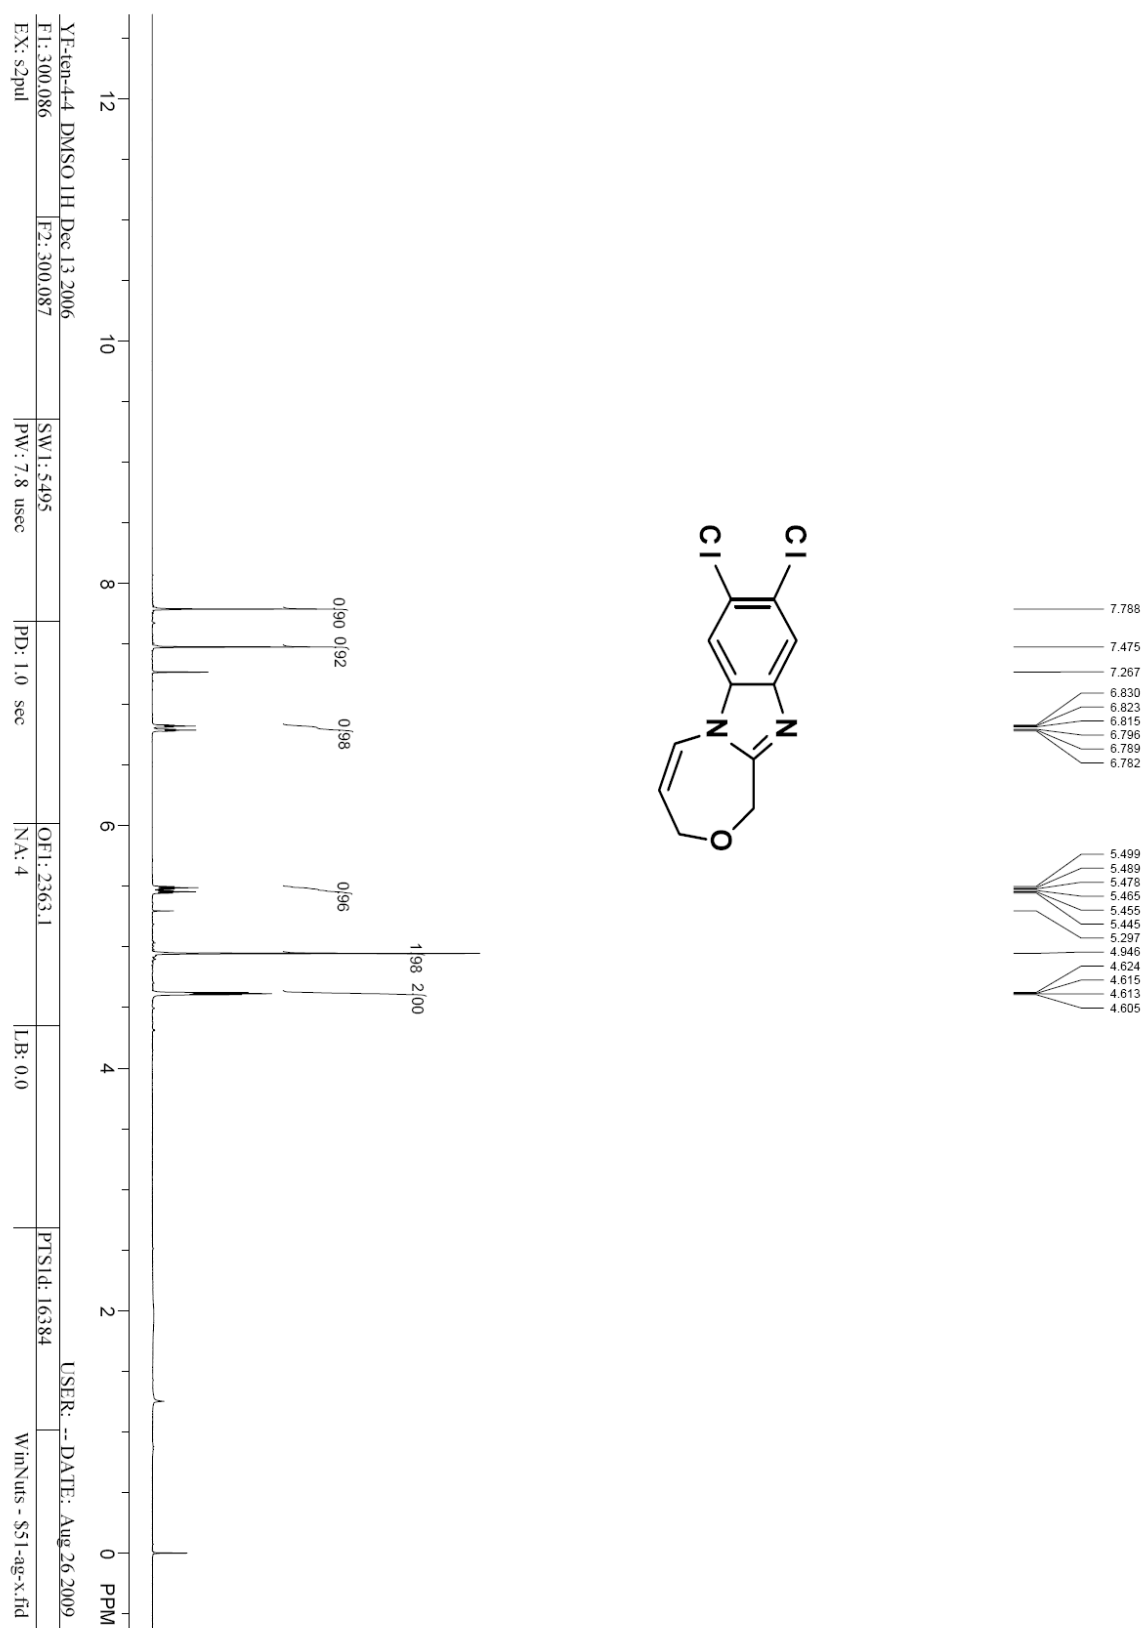

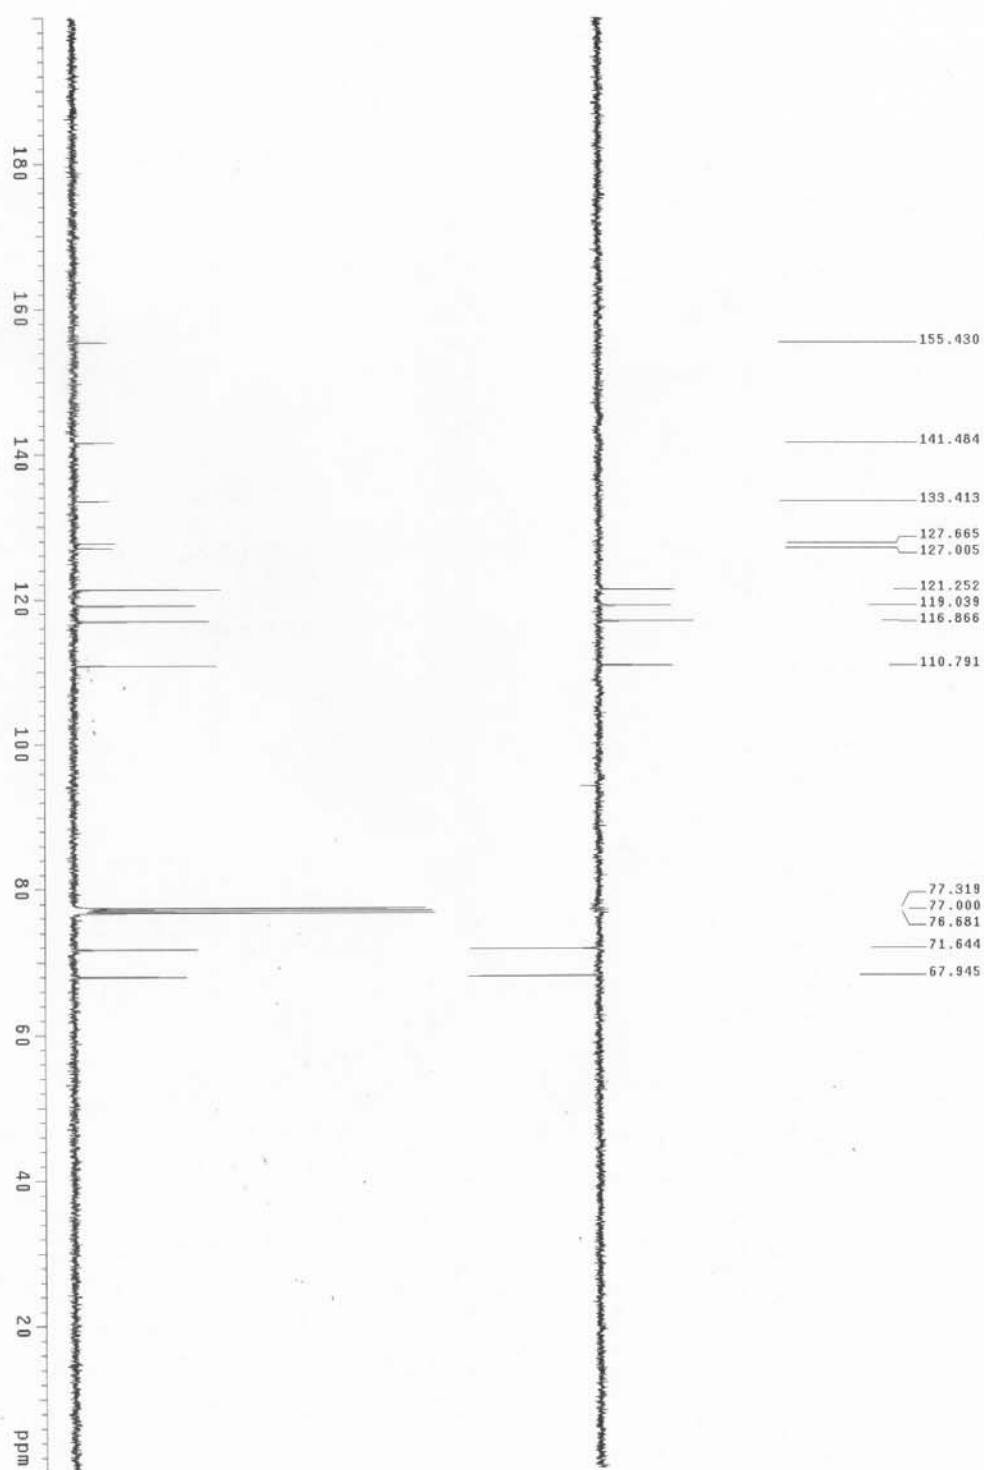

# 5-Methyl-7H,9H-8-oxa-4b,10-diaza-benz[a]azulene (C20)

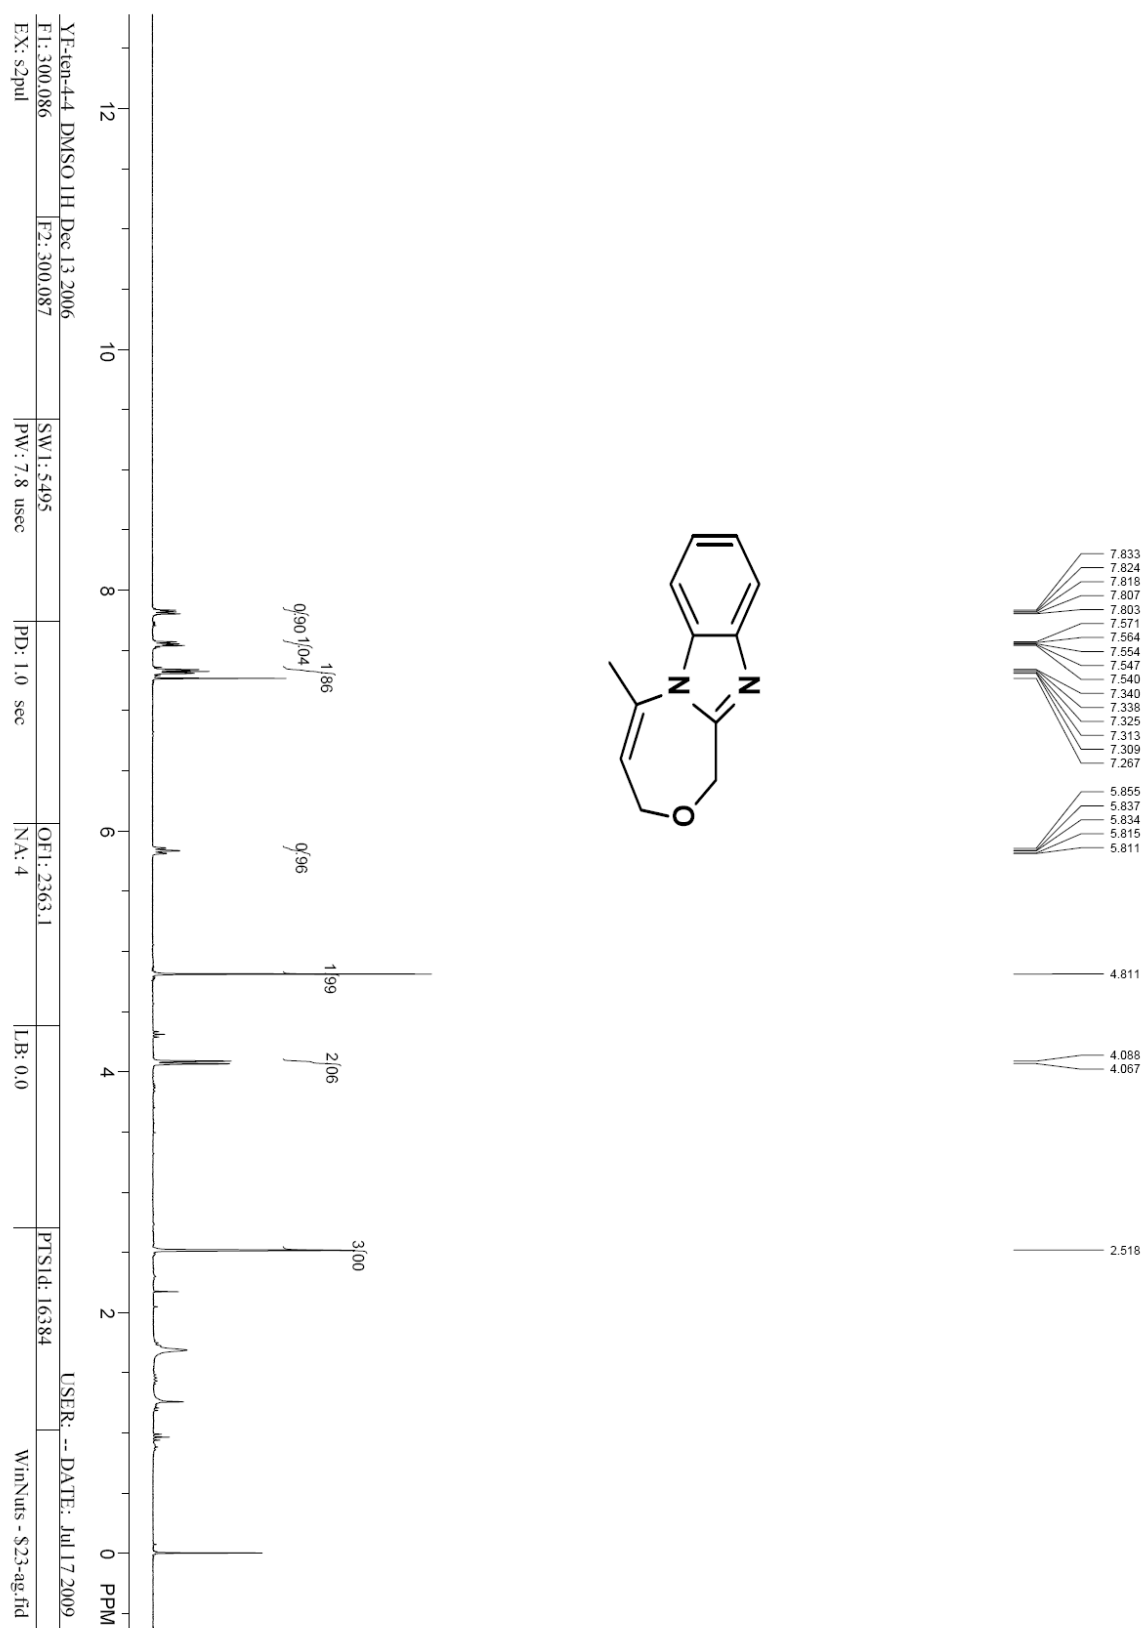

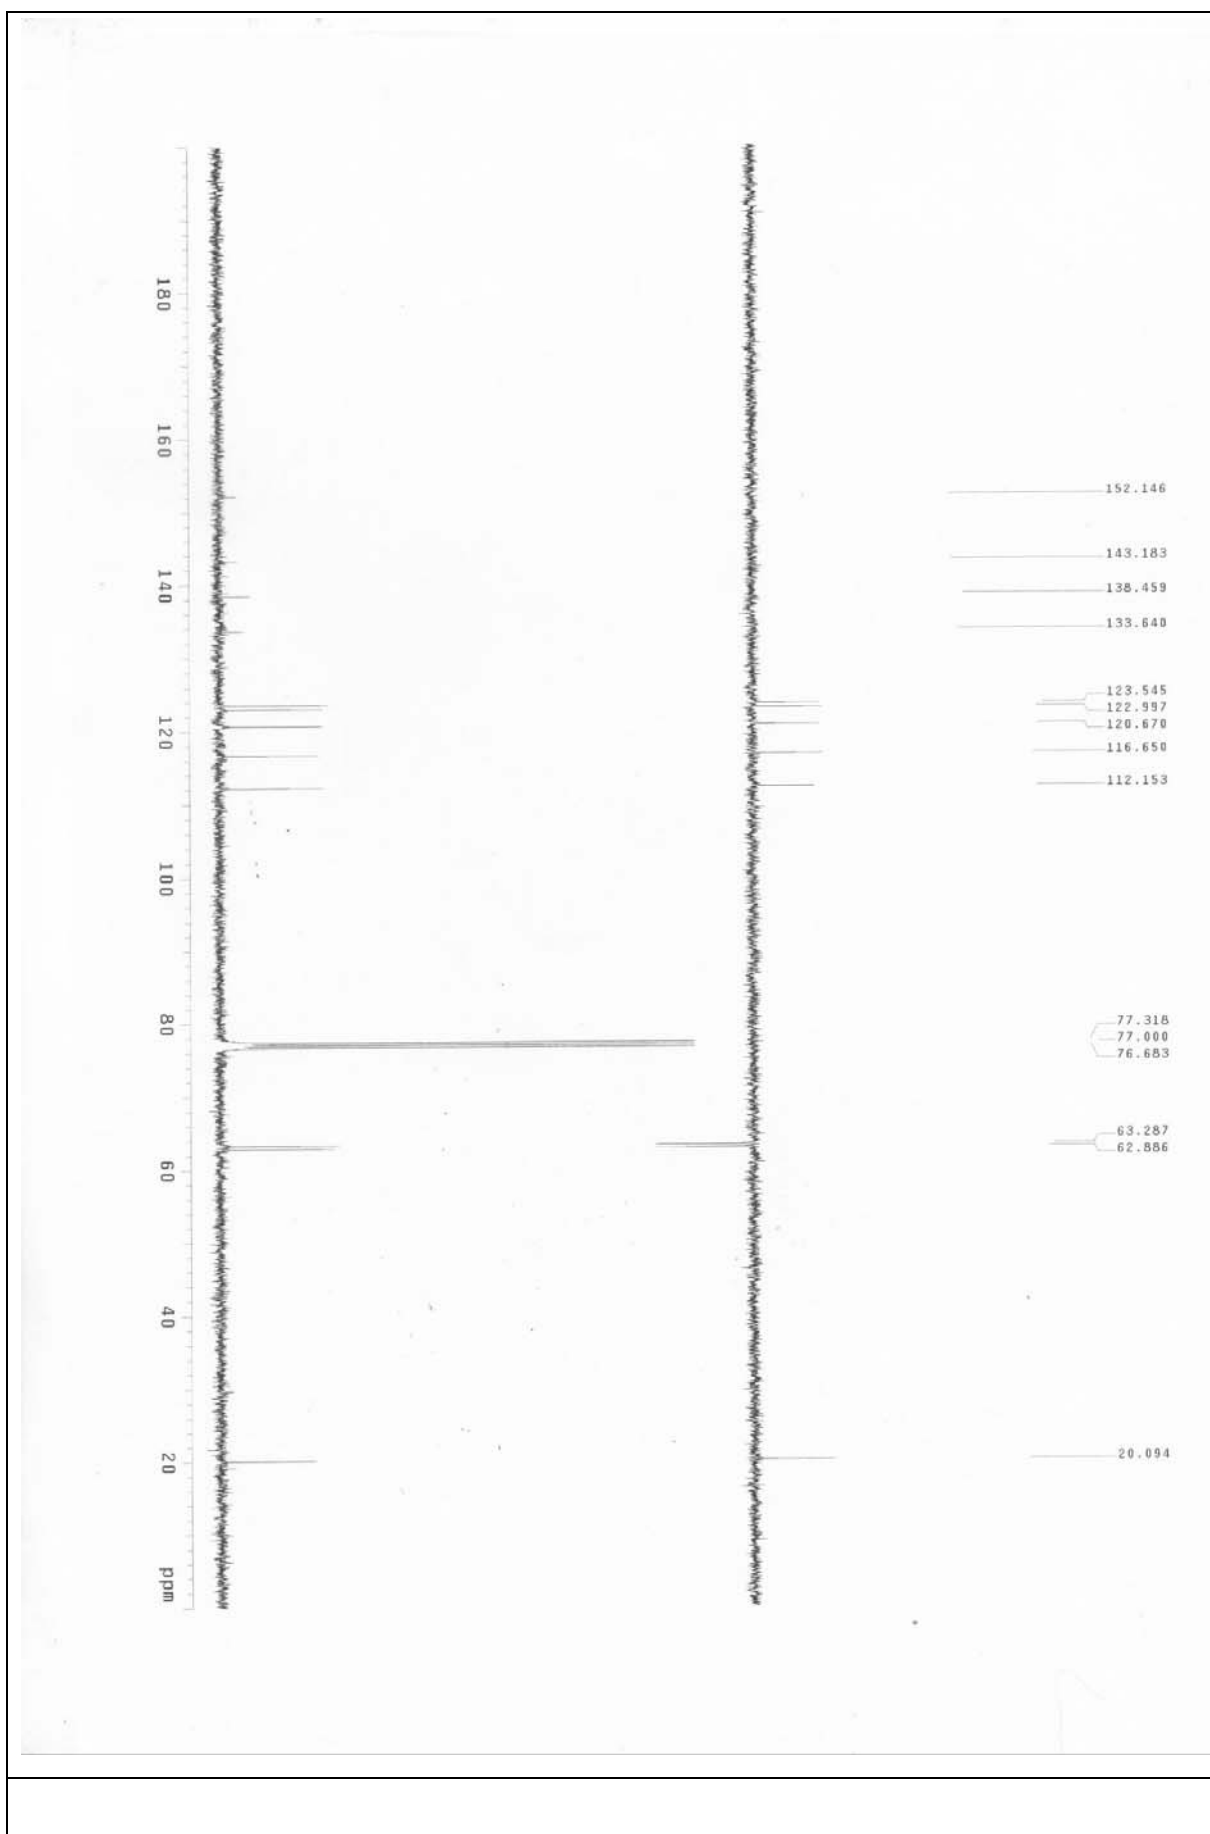

**2,3,5-Trimethyl-7H,9H-8-oxa-4b,10-diaza-benz[a]azulene (C21)**

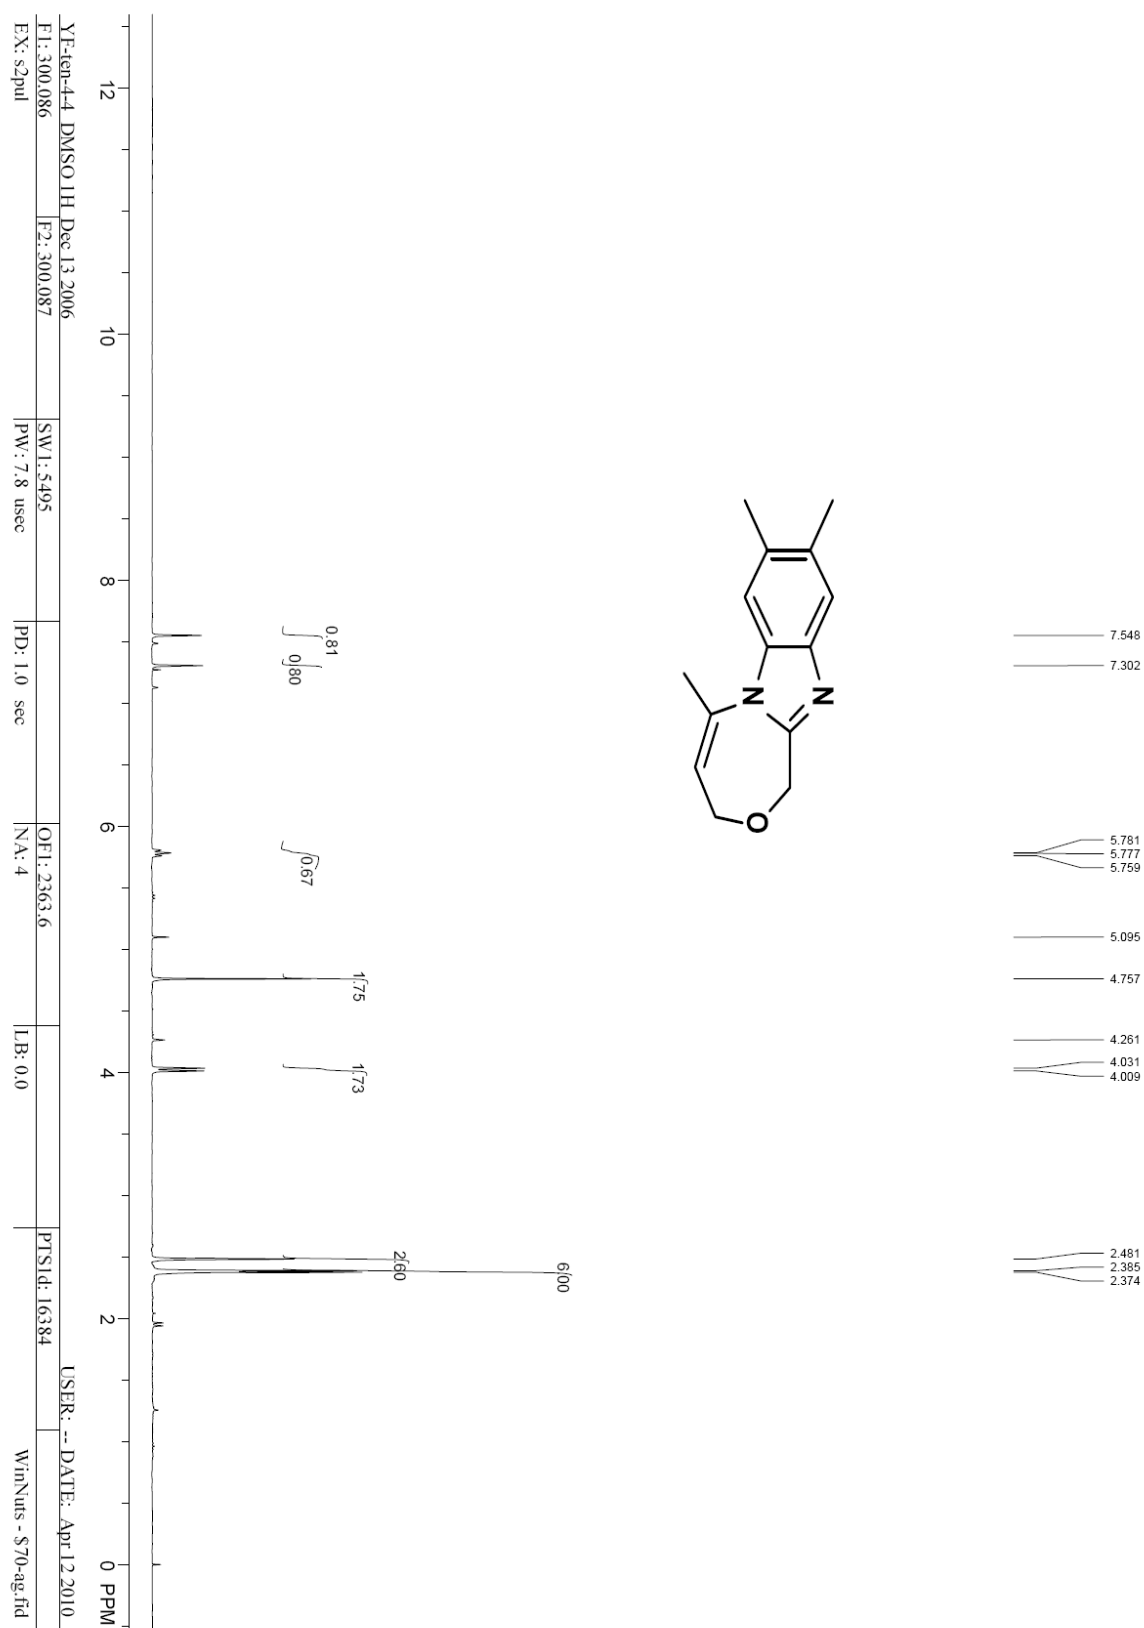

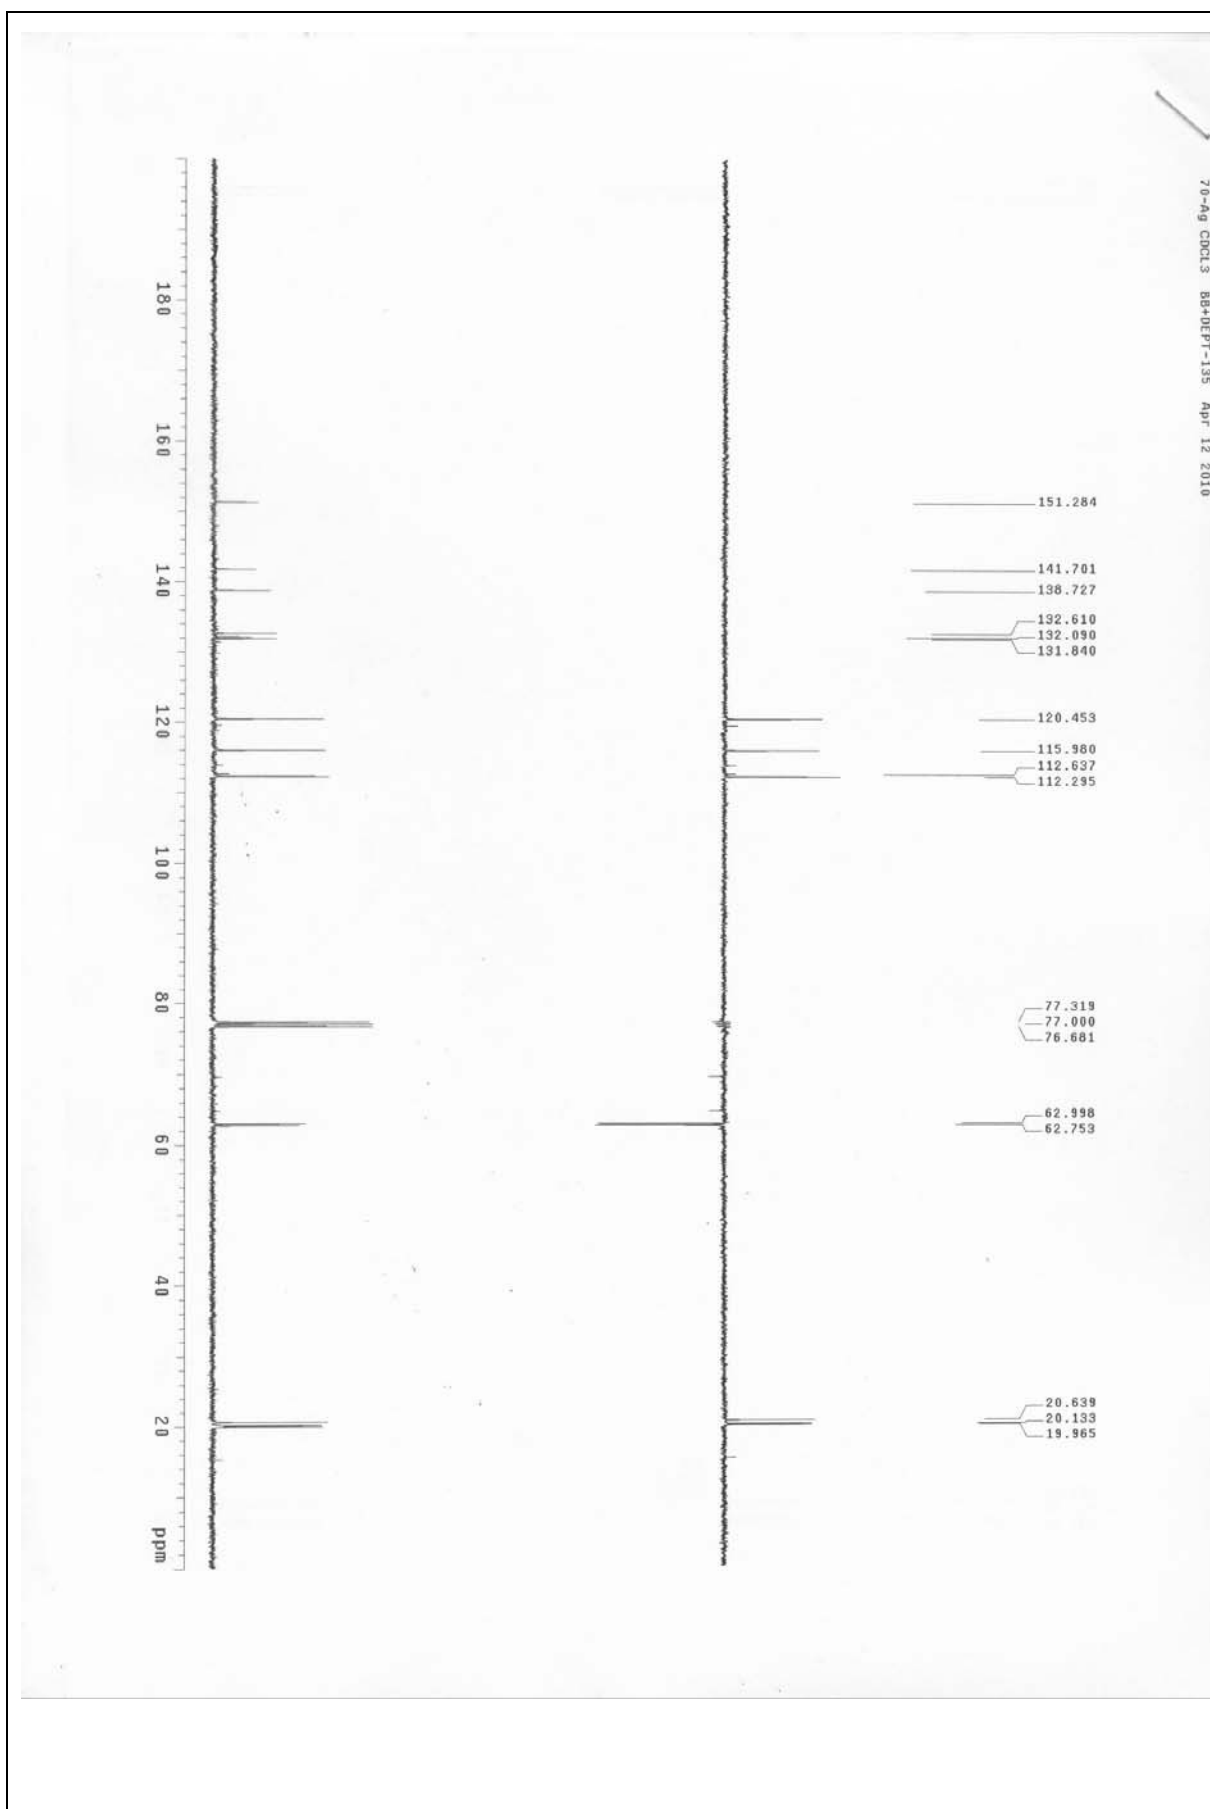



# 2,3-Dichloro-5-methyl-7*H*,9*H*-8-oxa-4*b*,10-diaza-benz[*a*]azulene (C22)

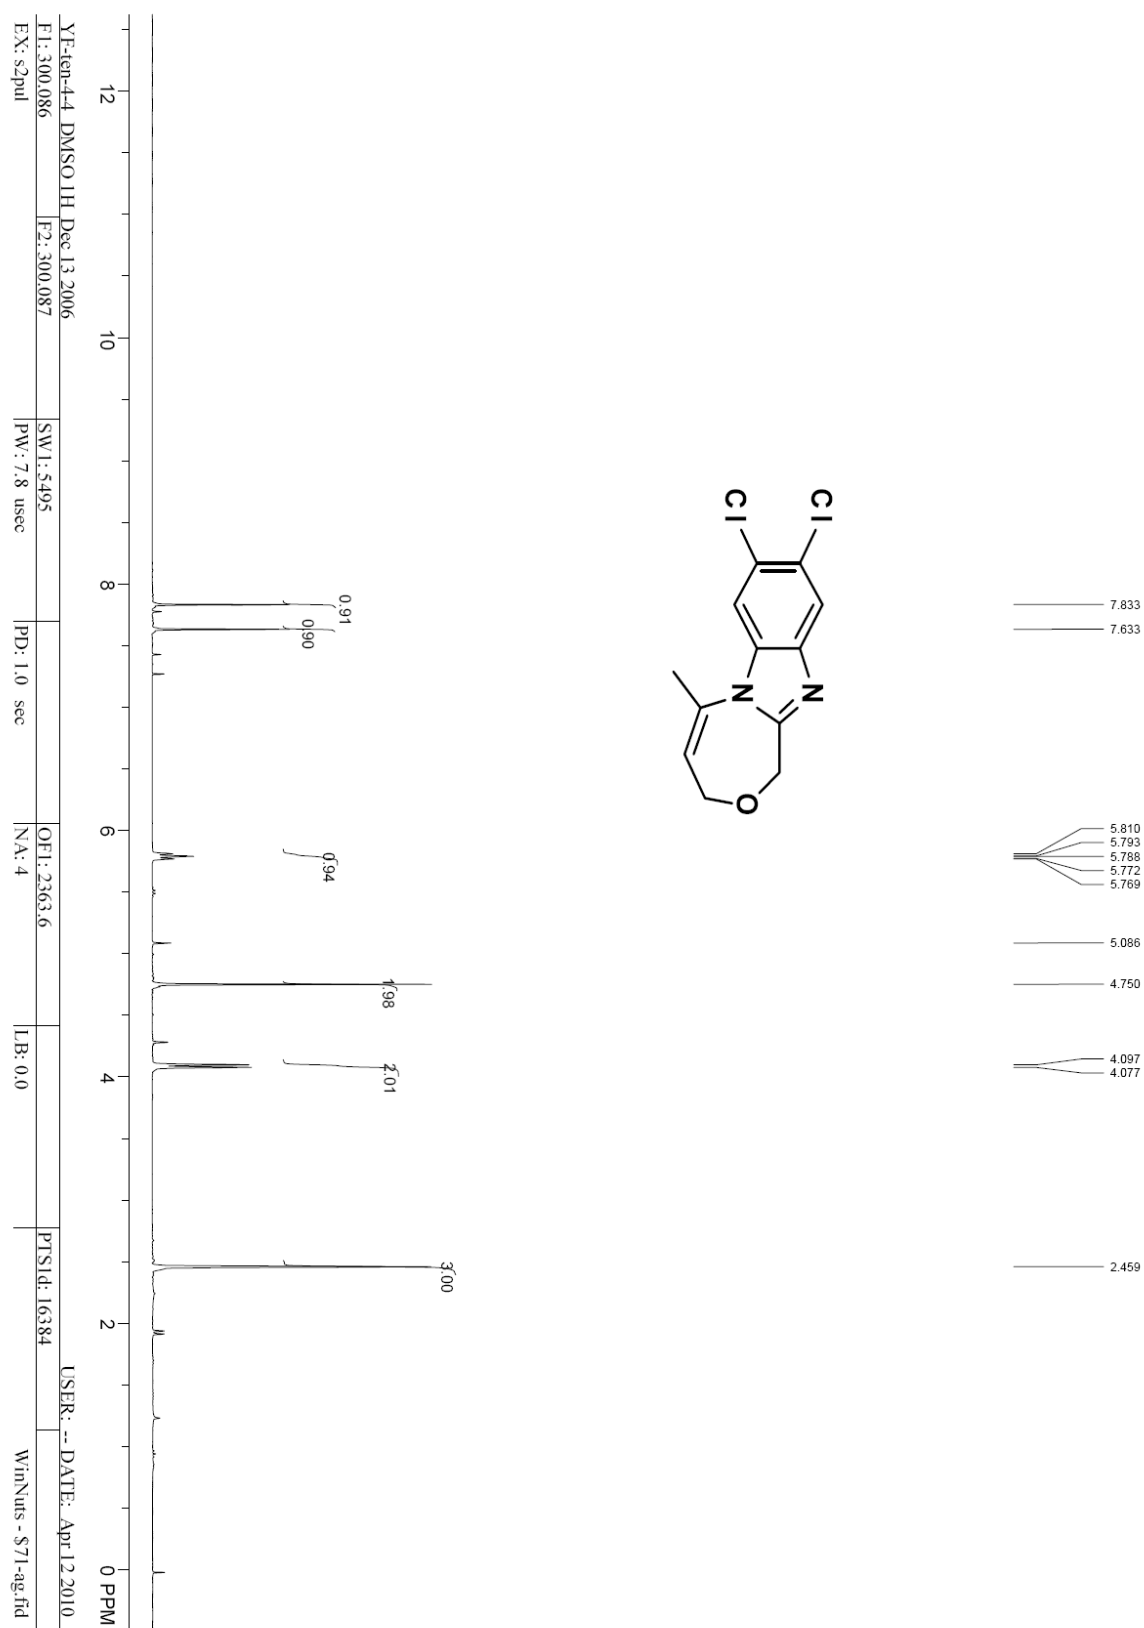

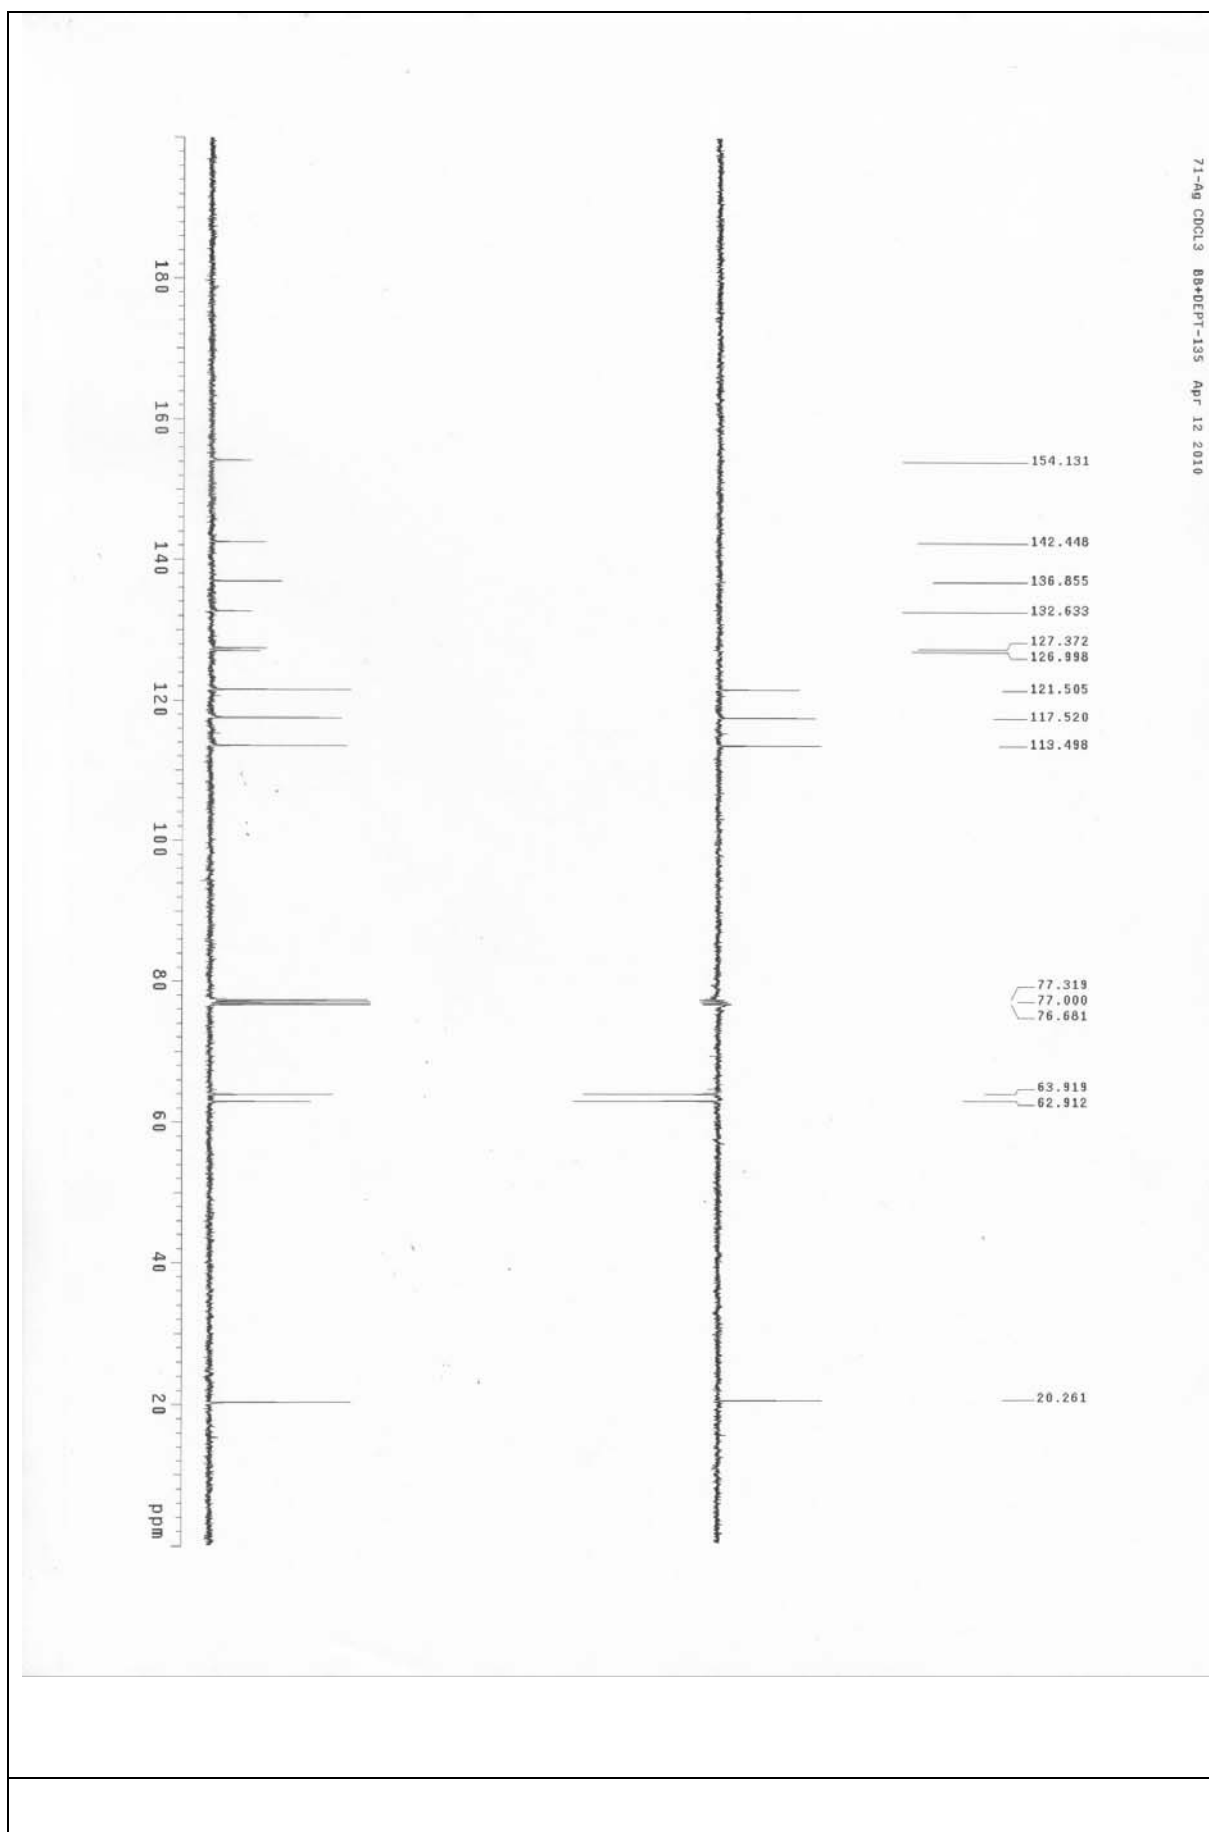

**4-[1-Phenyl-meth-(Z)-ylidene]-3,4-dihydro-1H-2-oxa-4a,9-diaza-fluorene (B23)**

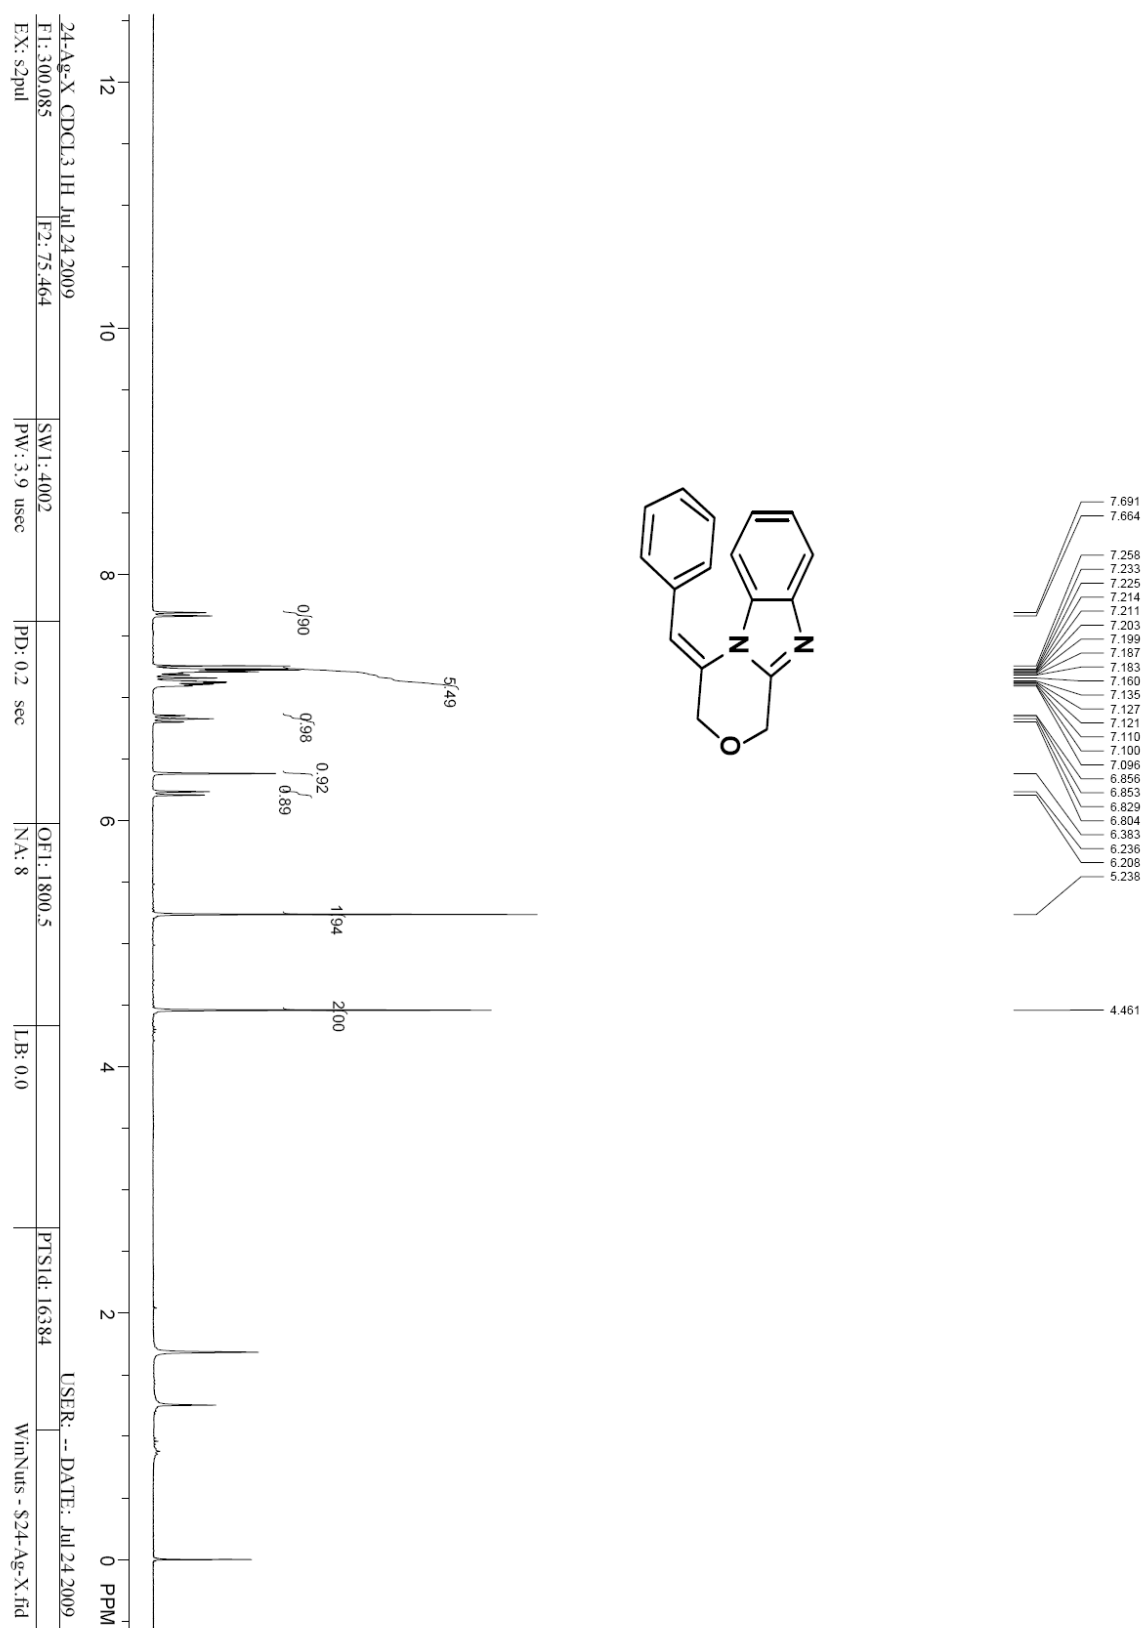

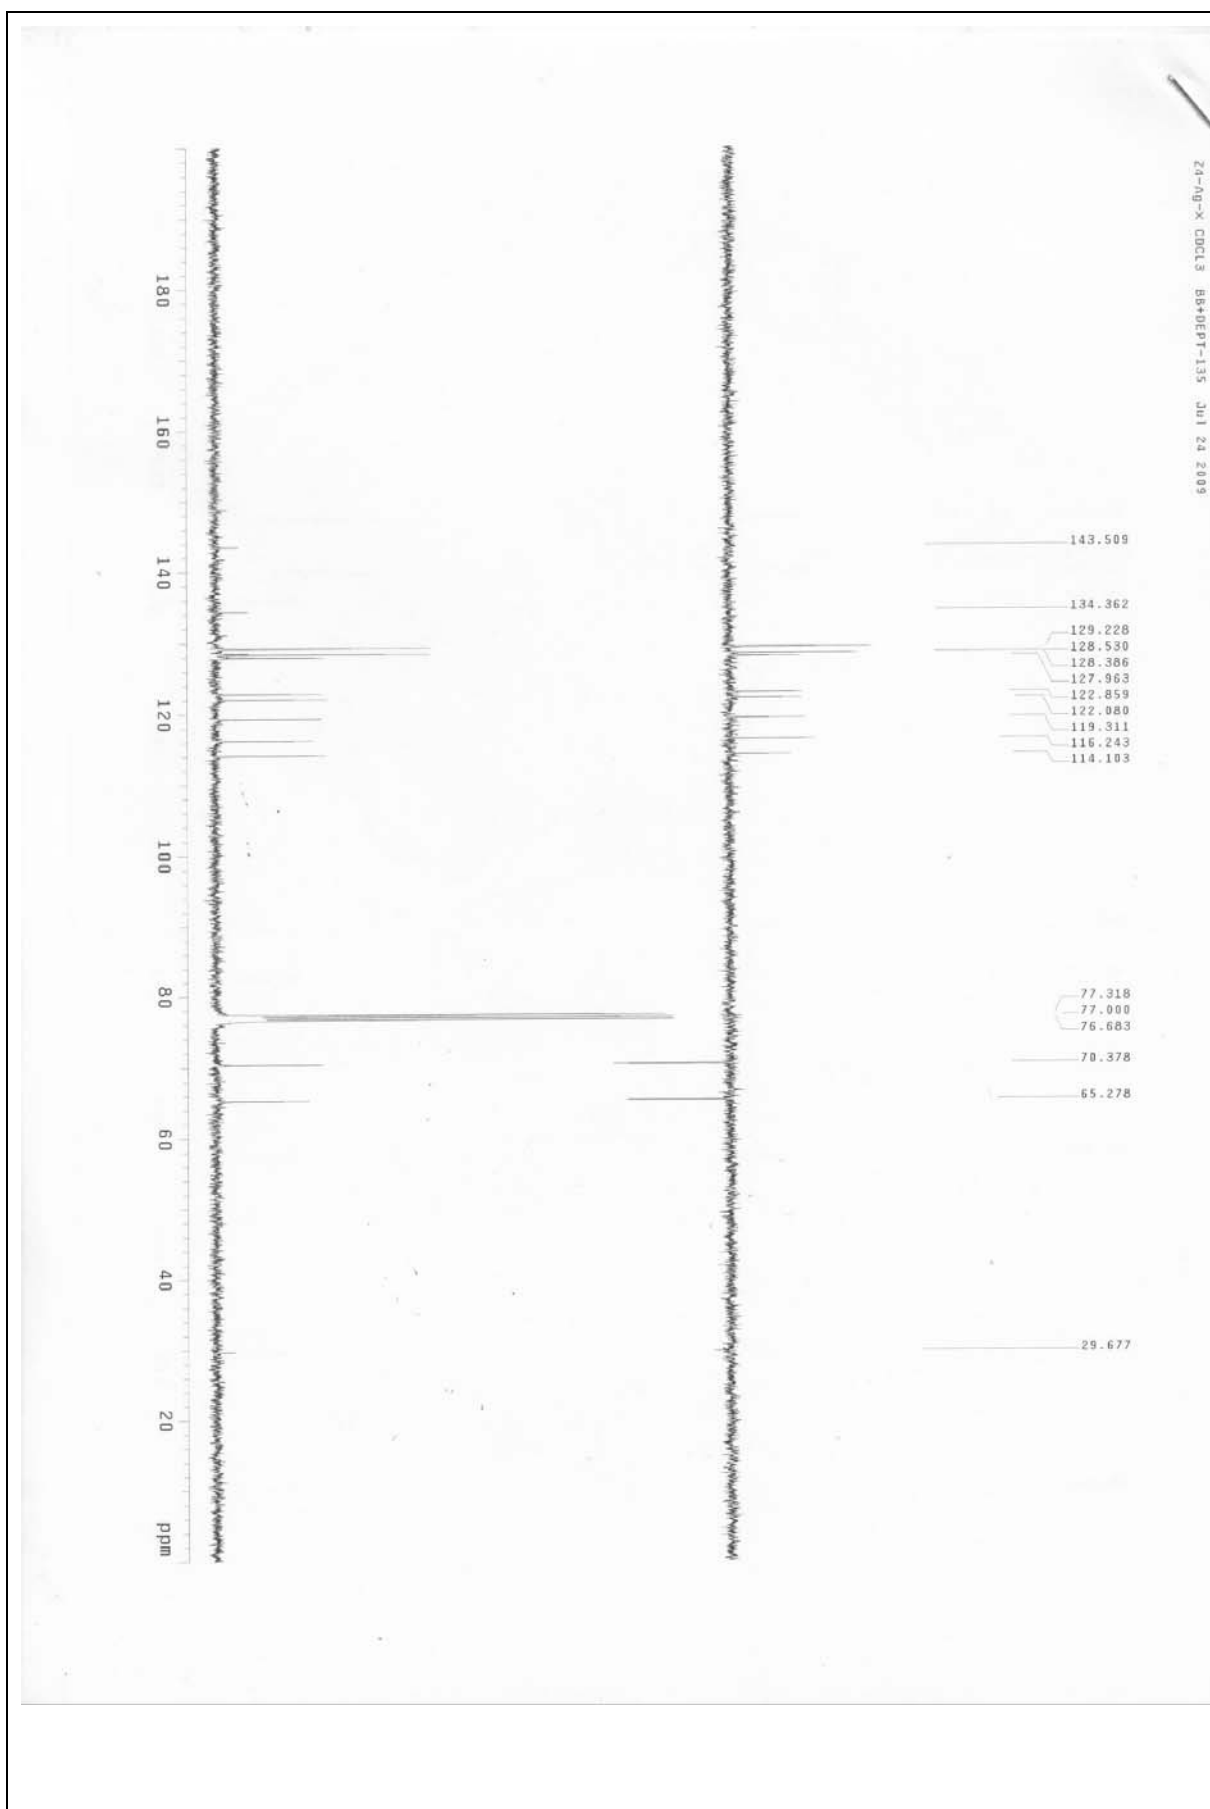

# 5-Phenyl-7H,9H-8-oxa-4b,10-diaza-benz[a]azulene (C23)

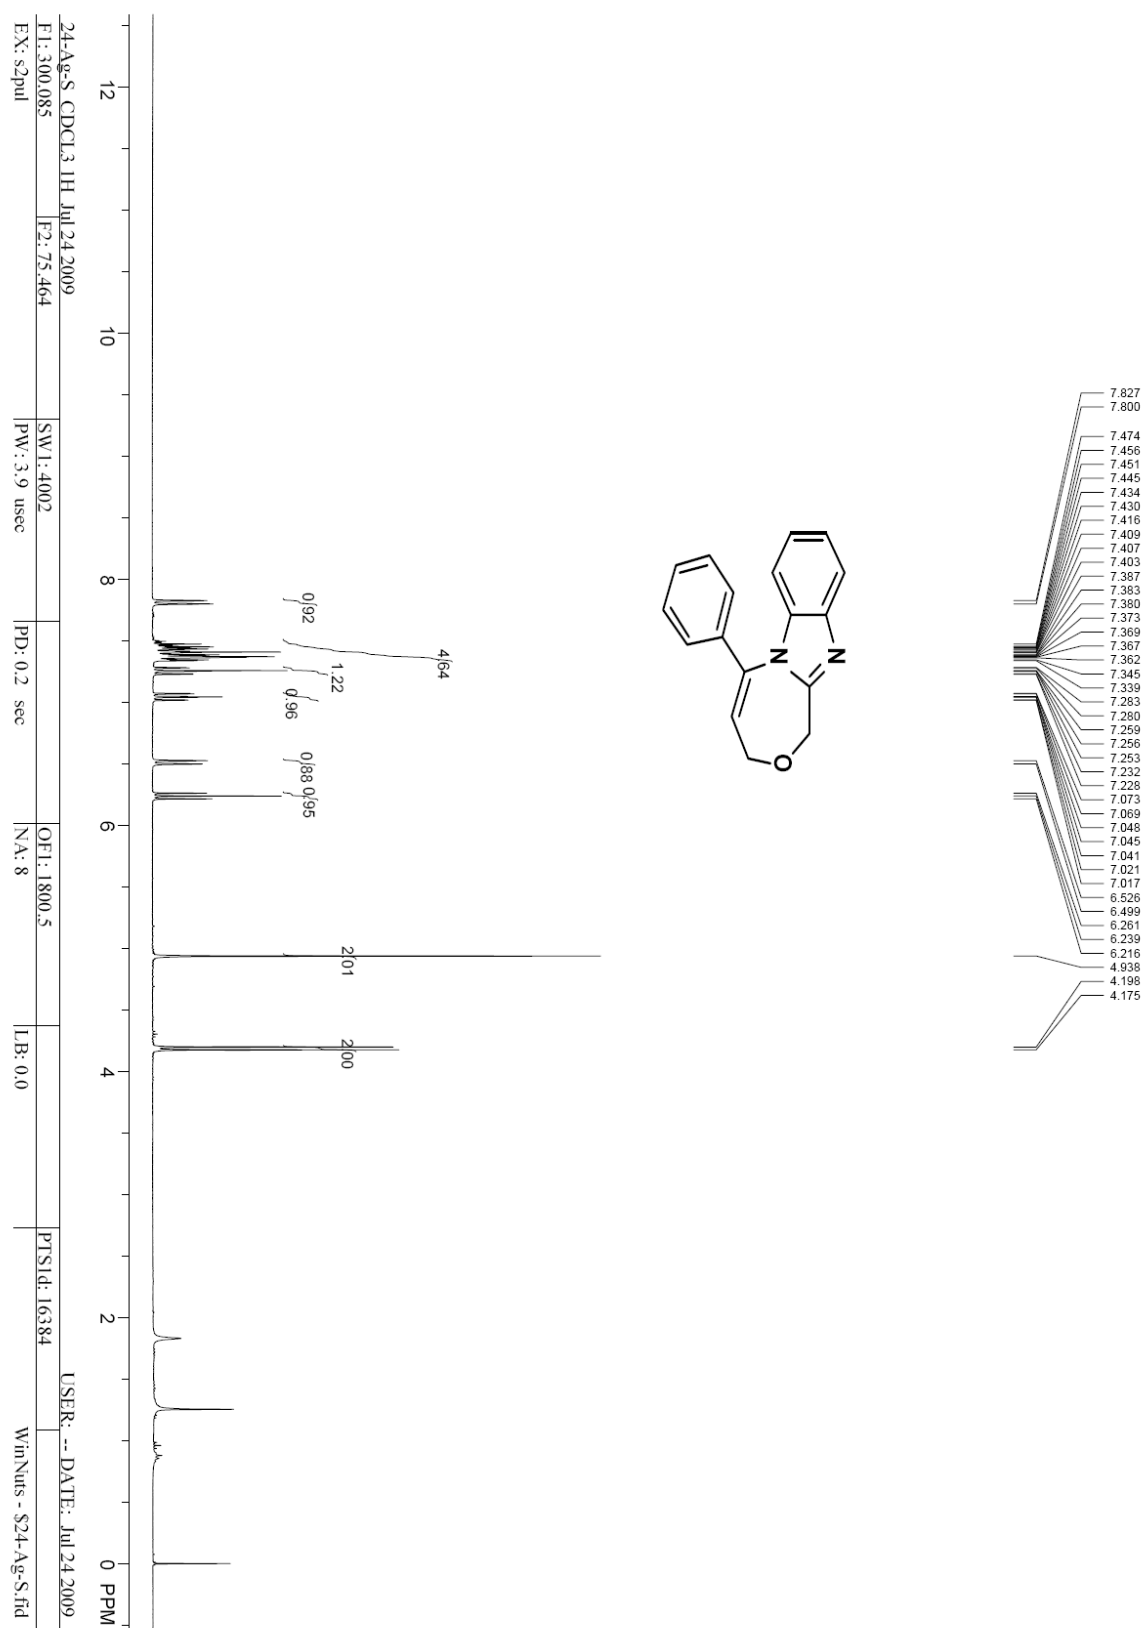

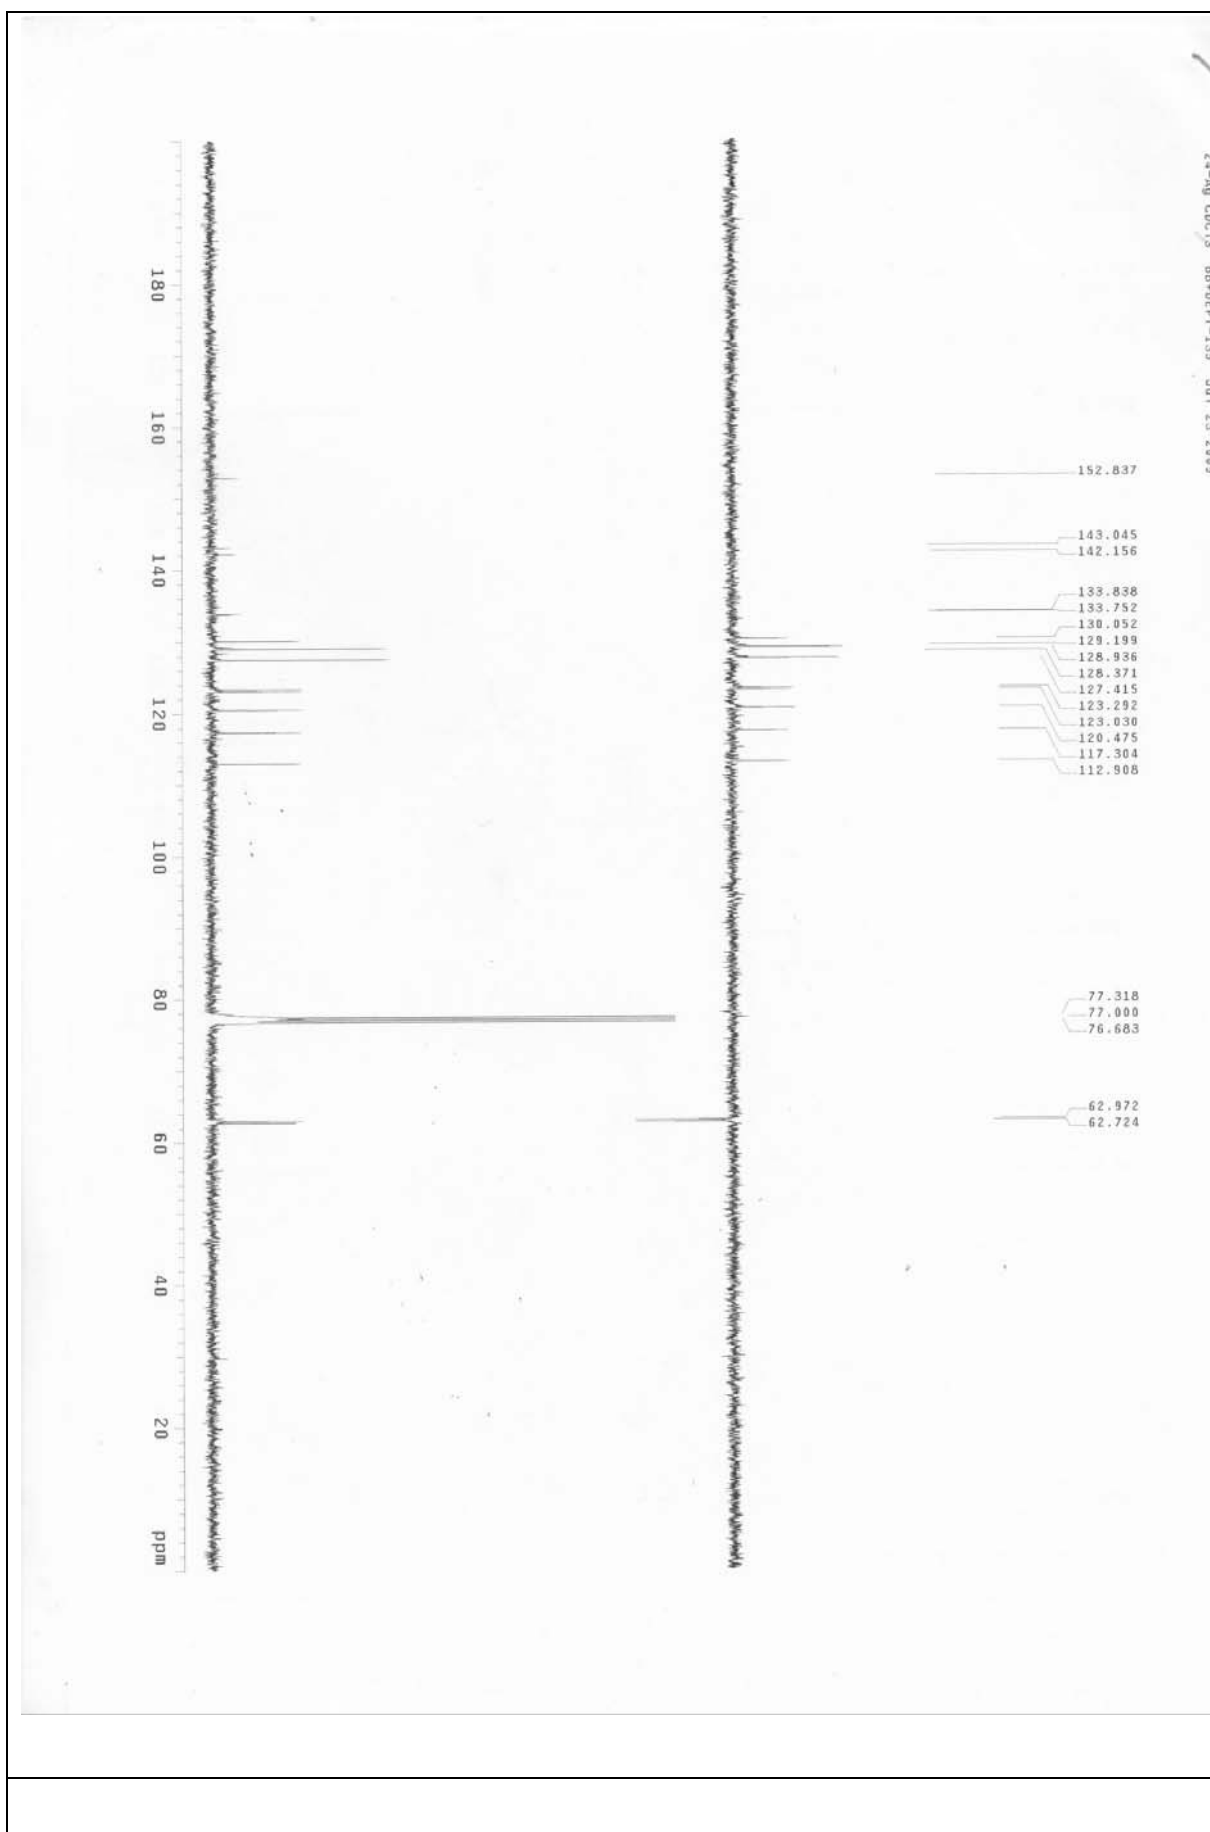

**4-[1-(2-Trifluoromethyl-phenyl)-meth-(Z)-ylidene]-3,4-dihydro-1H-2-oxa-4a,9-diaza-fluorene (B24)**

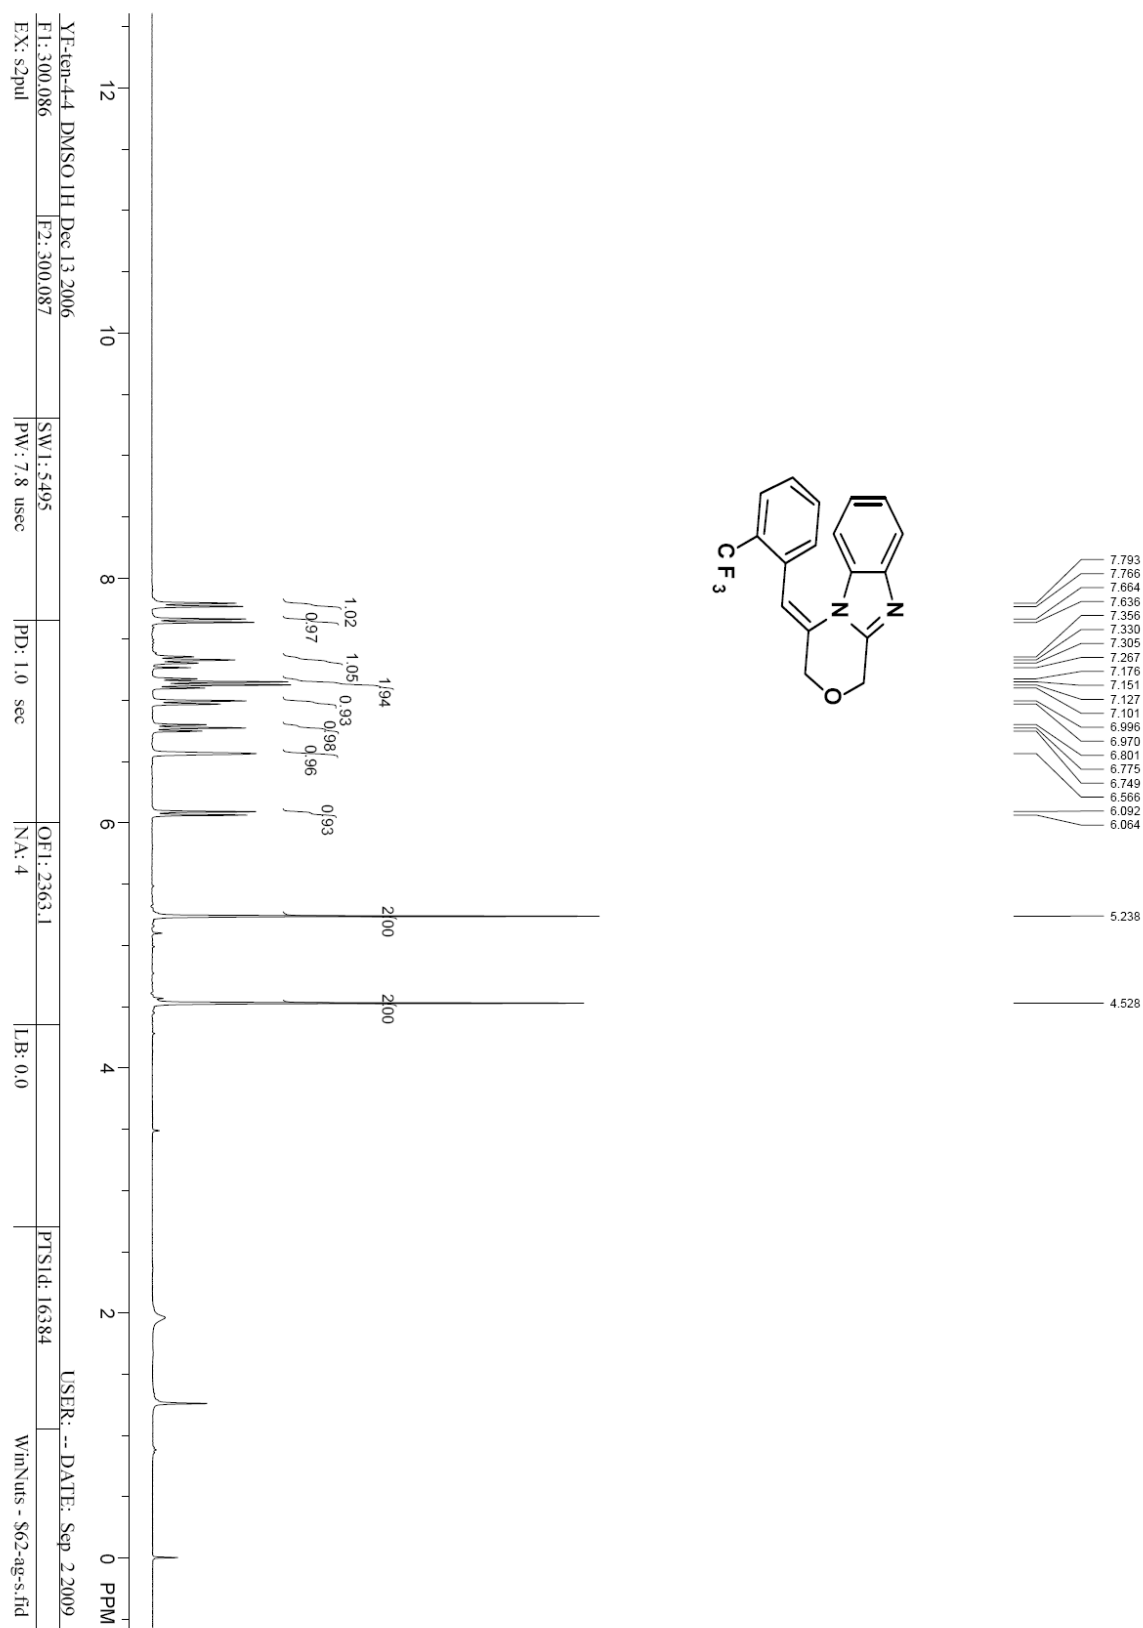

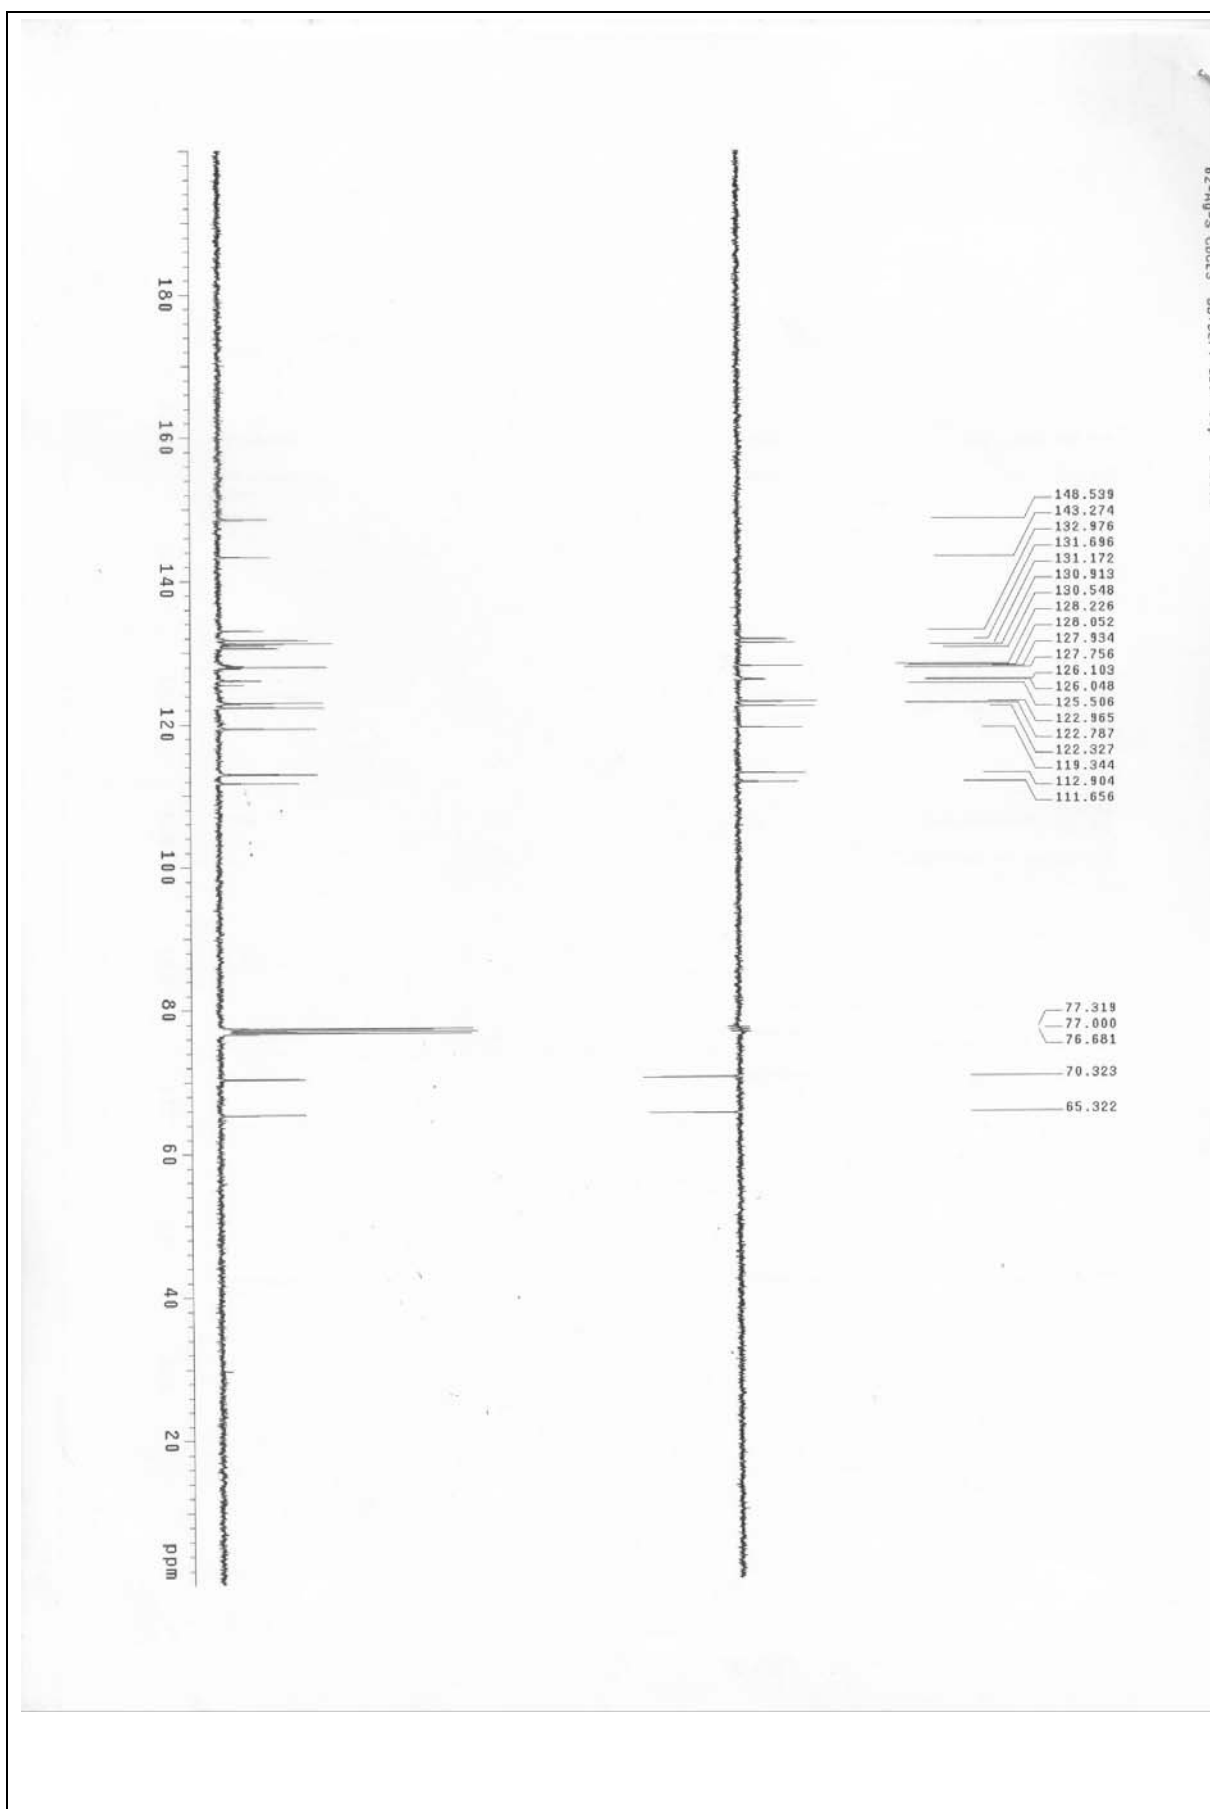



# 5-(2-tert-Butyl-phenyl)-7H,9H-8-oxa-4b,10-diaza-benz[a]azulene (C24)

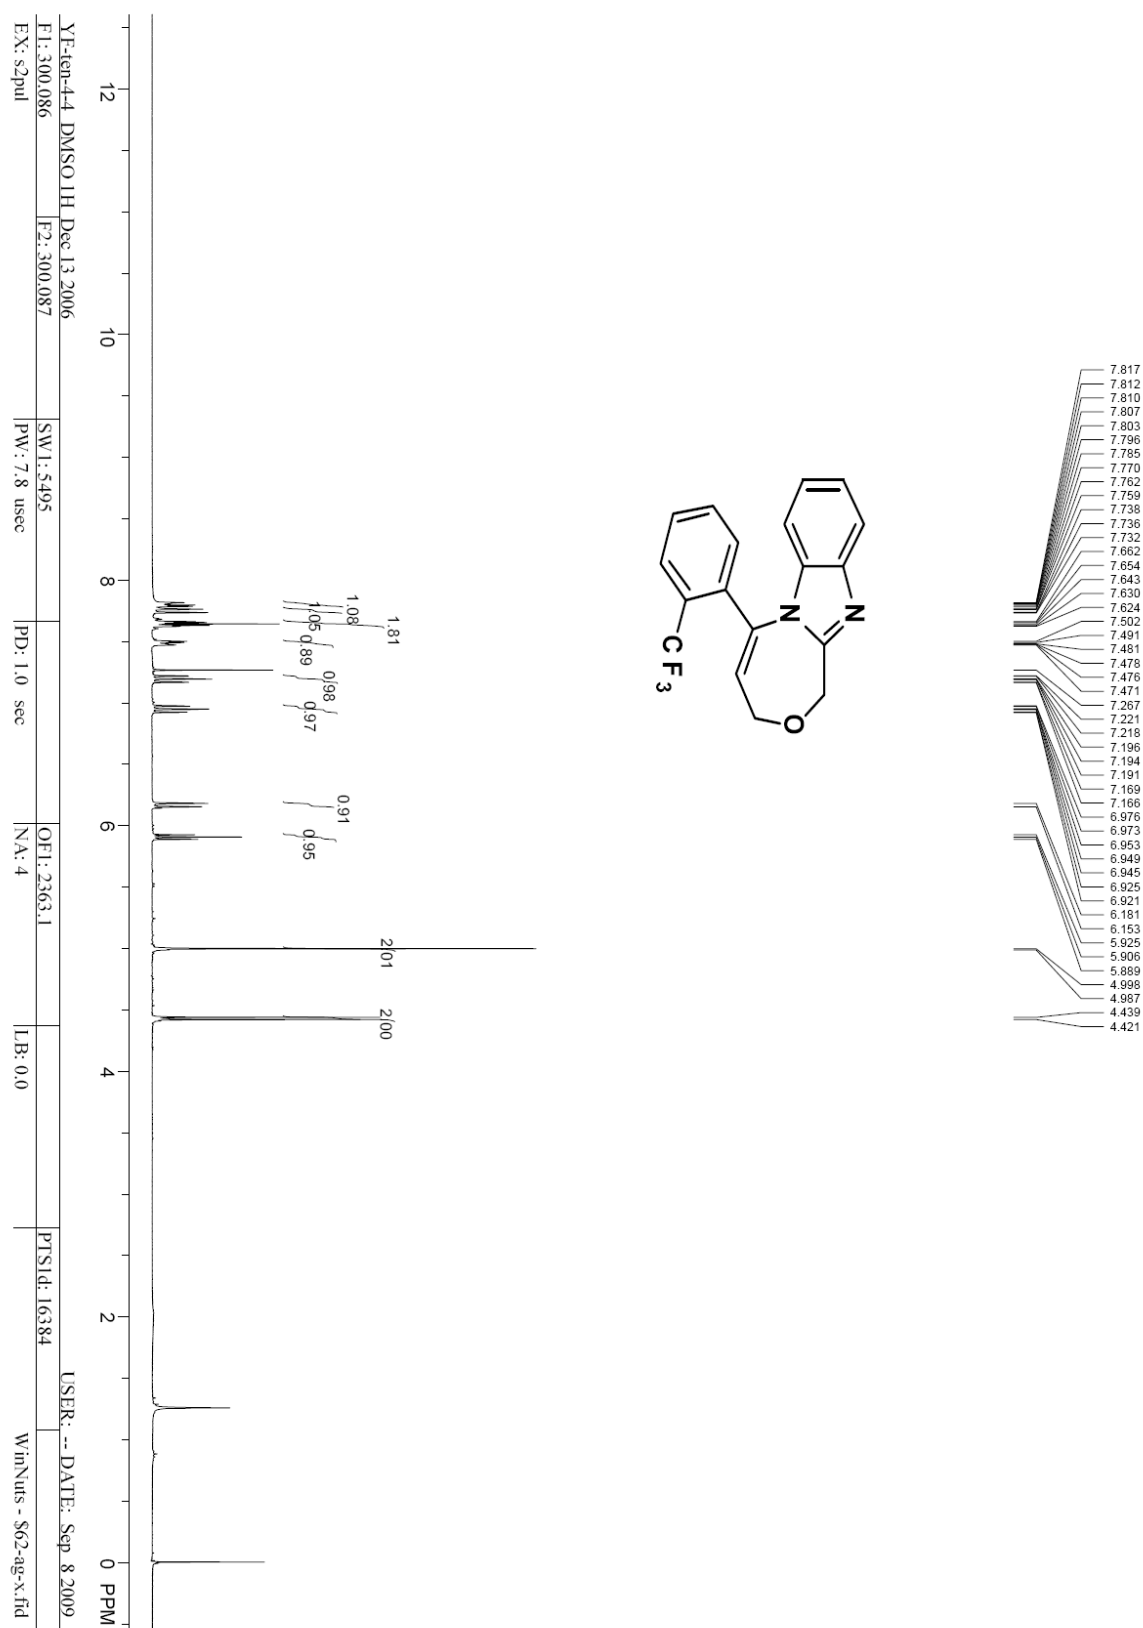

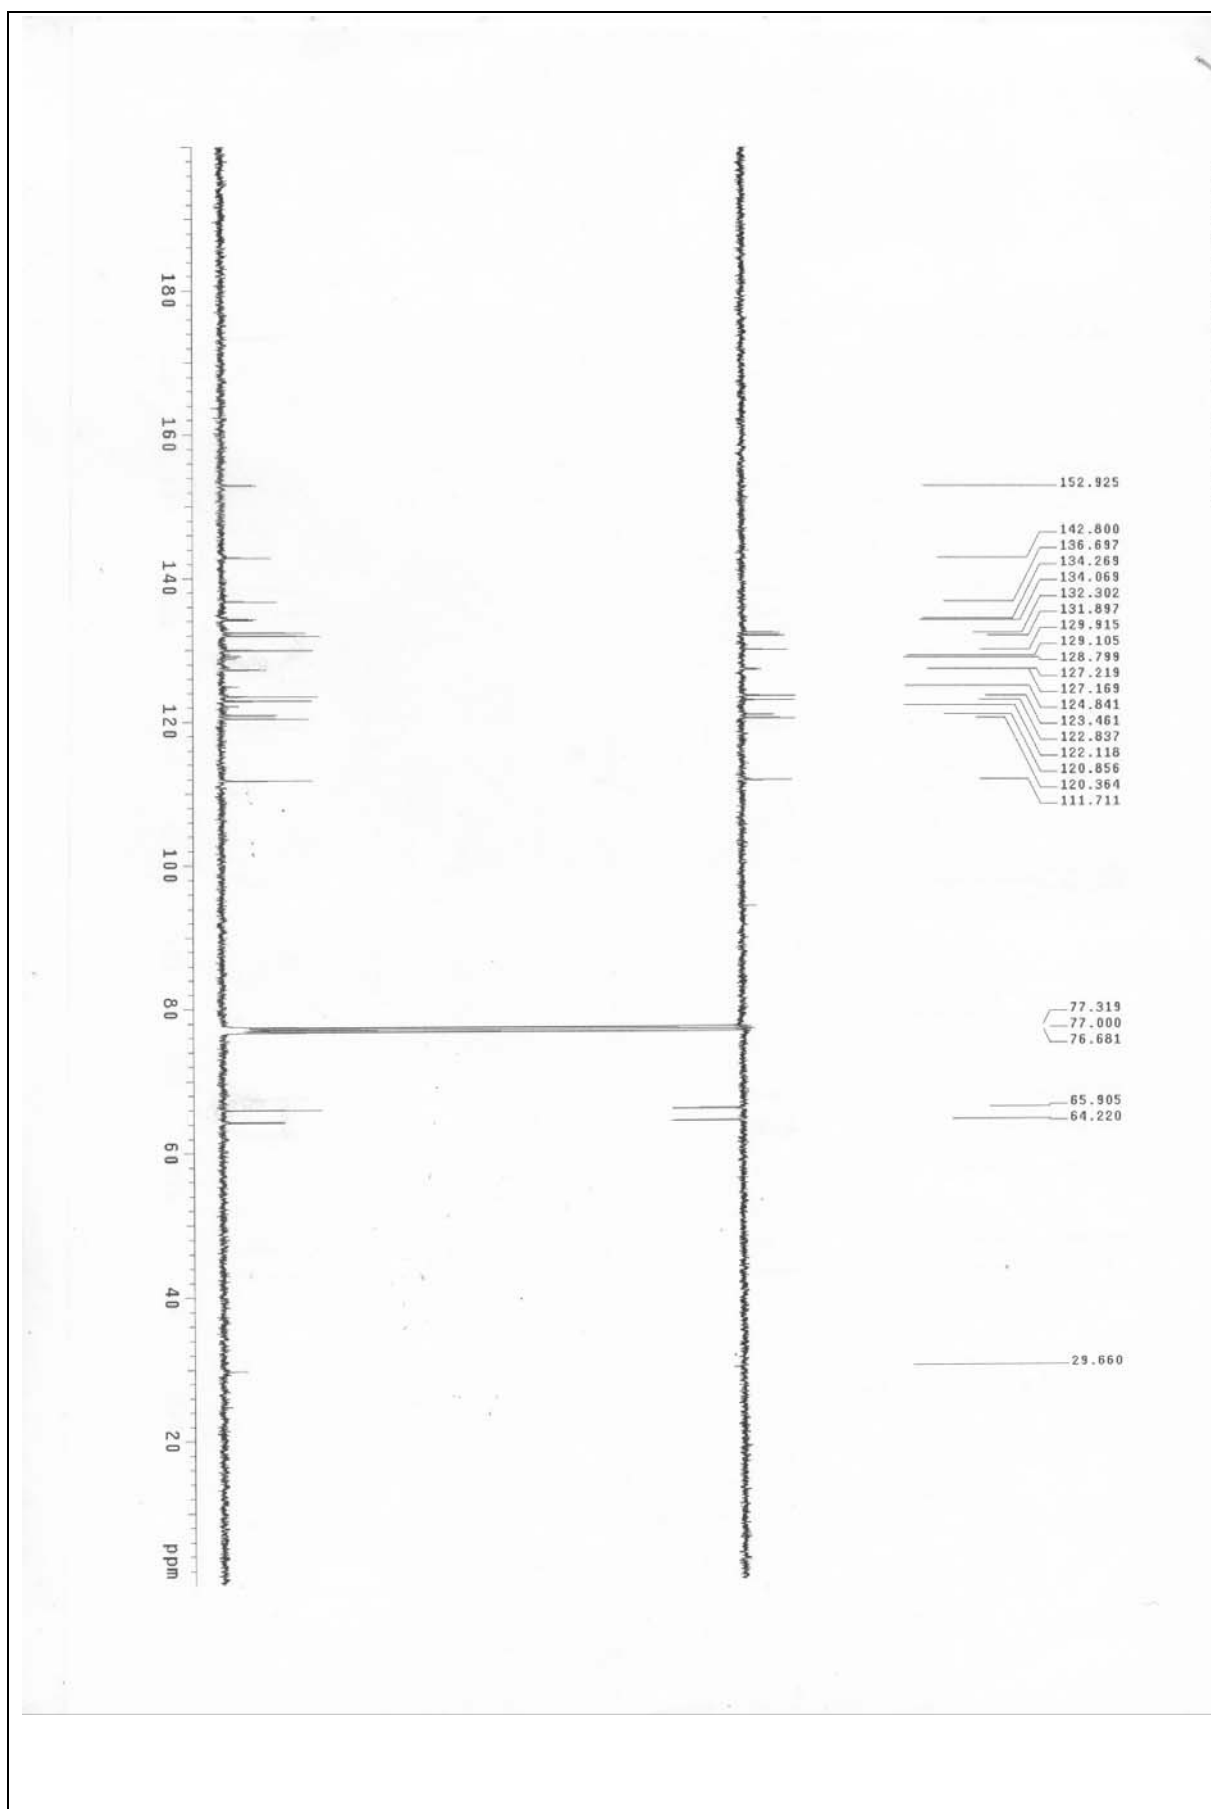

**4-[1-(4-Trifluoromethyl-phenyl)-meth-(Z)-ylidene]-3,4-dihydro-1H-2-oxa-4a,9-diaza-fluorene (B25)**

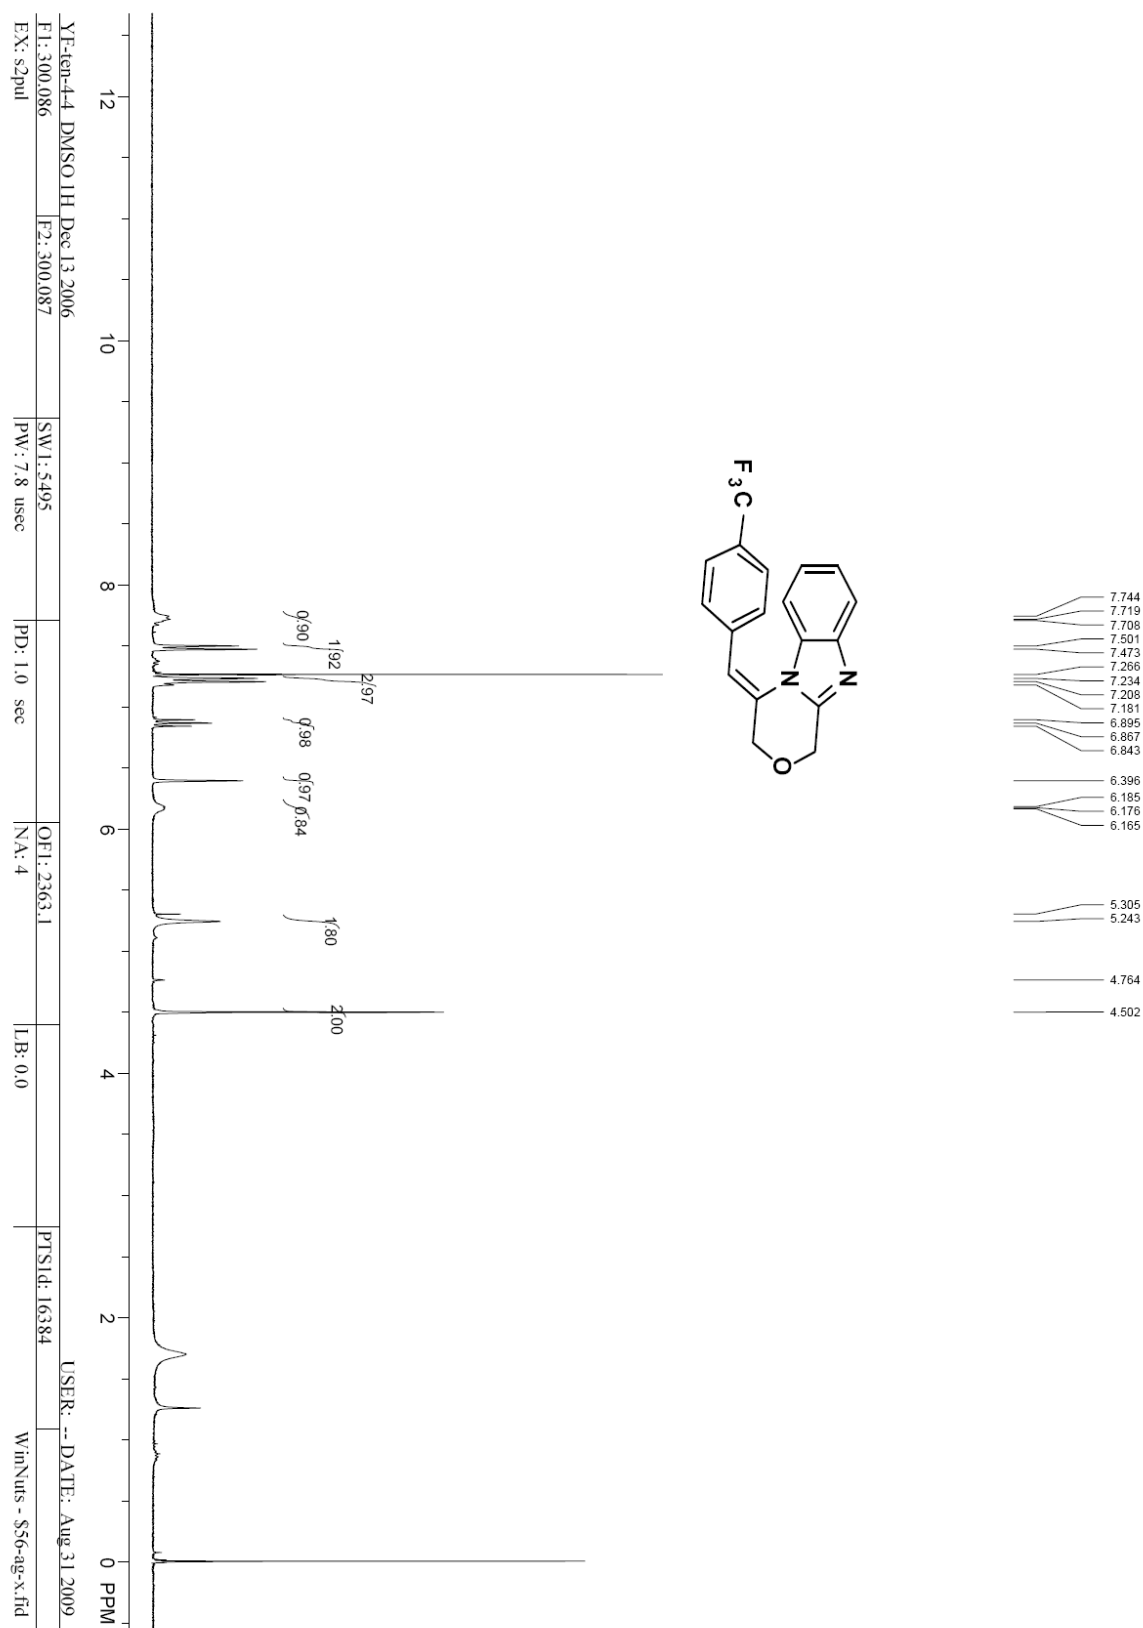

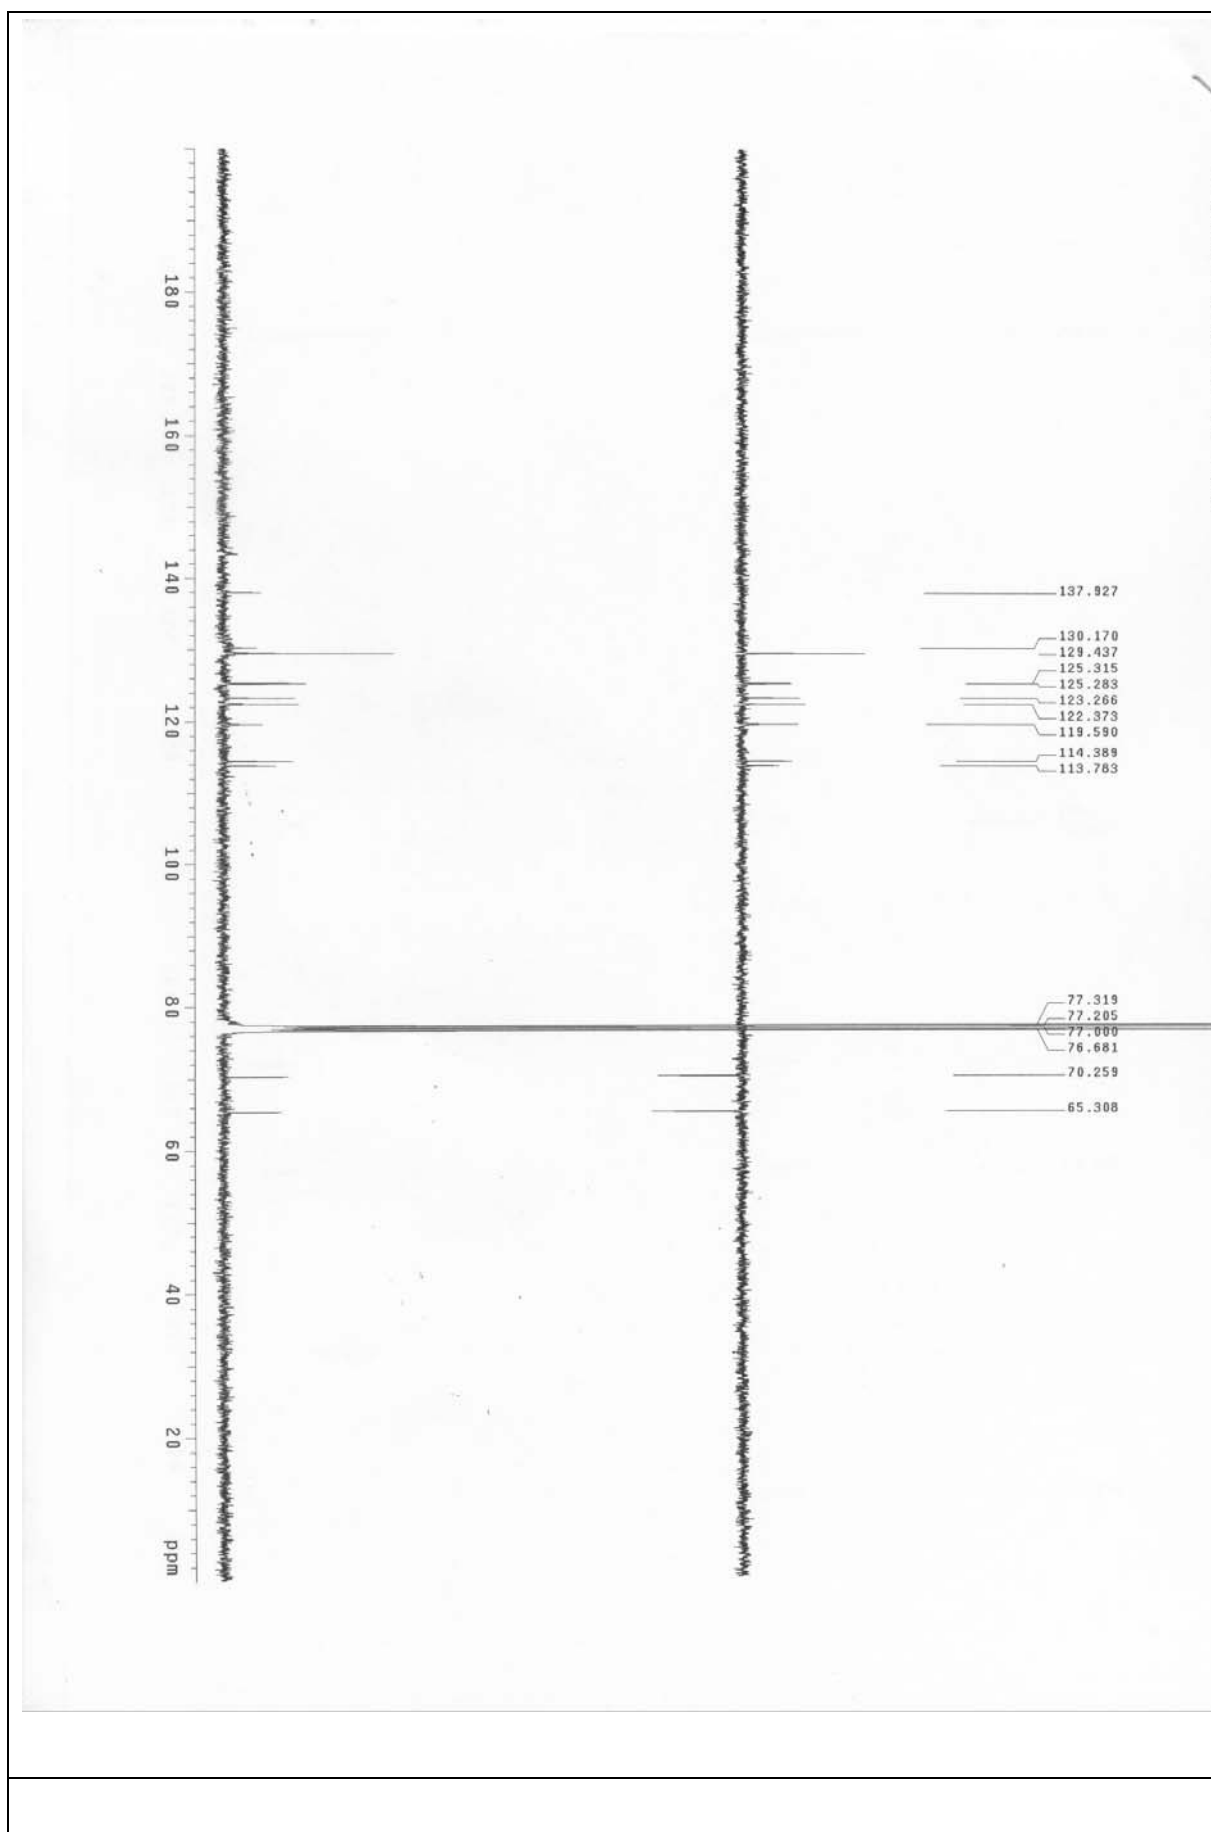

**5-(4-Trifluoromethyl-phenyl)-7*H*,9*H*-8-oxa-4*b*,10-diaza-benz[*a*]azulene (C25)**

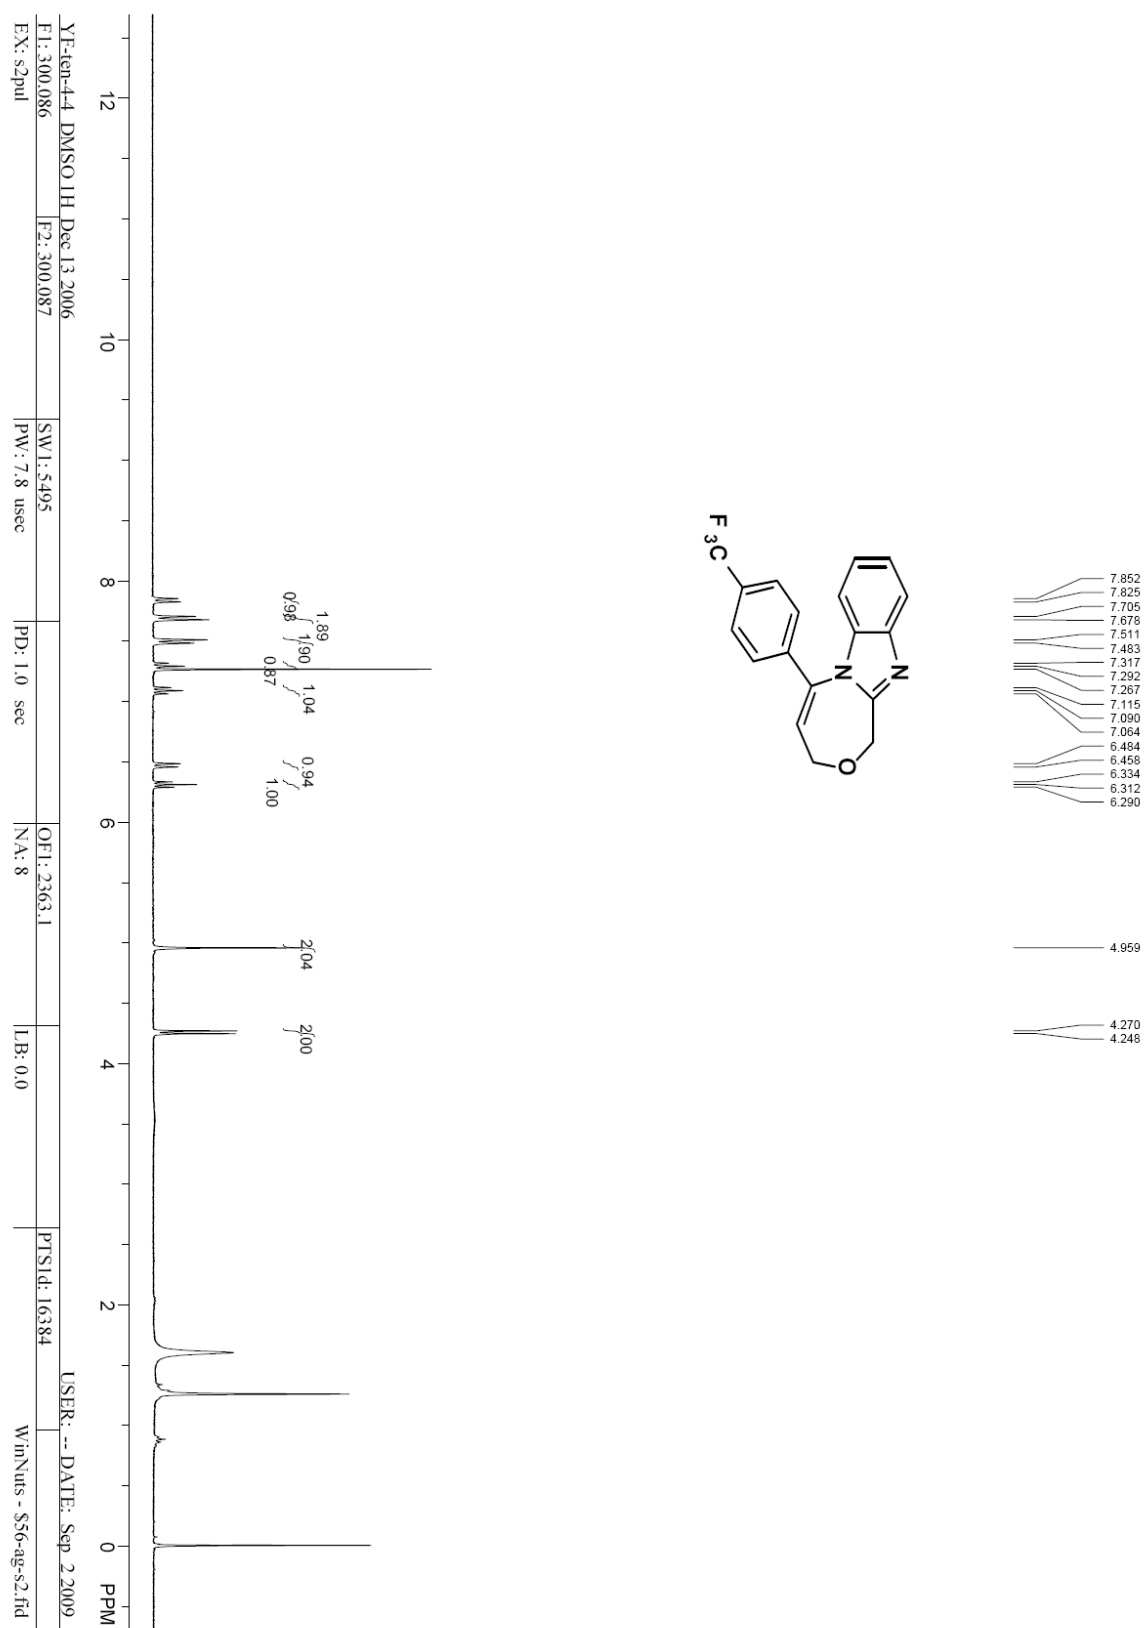

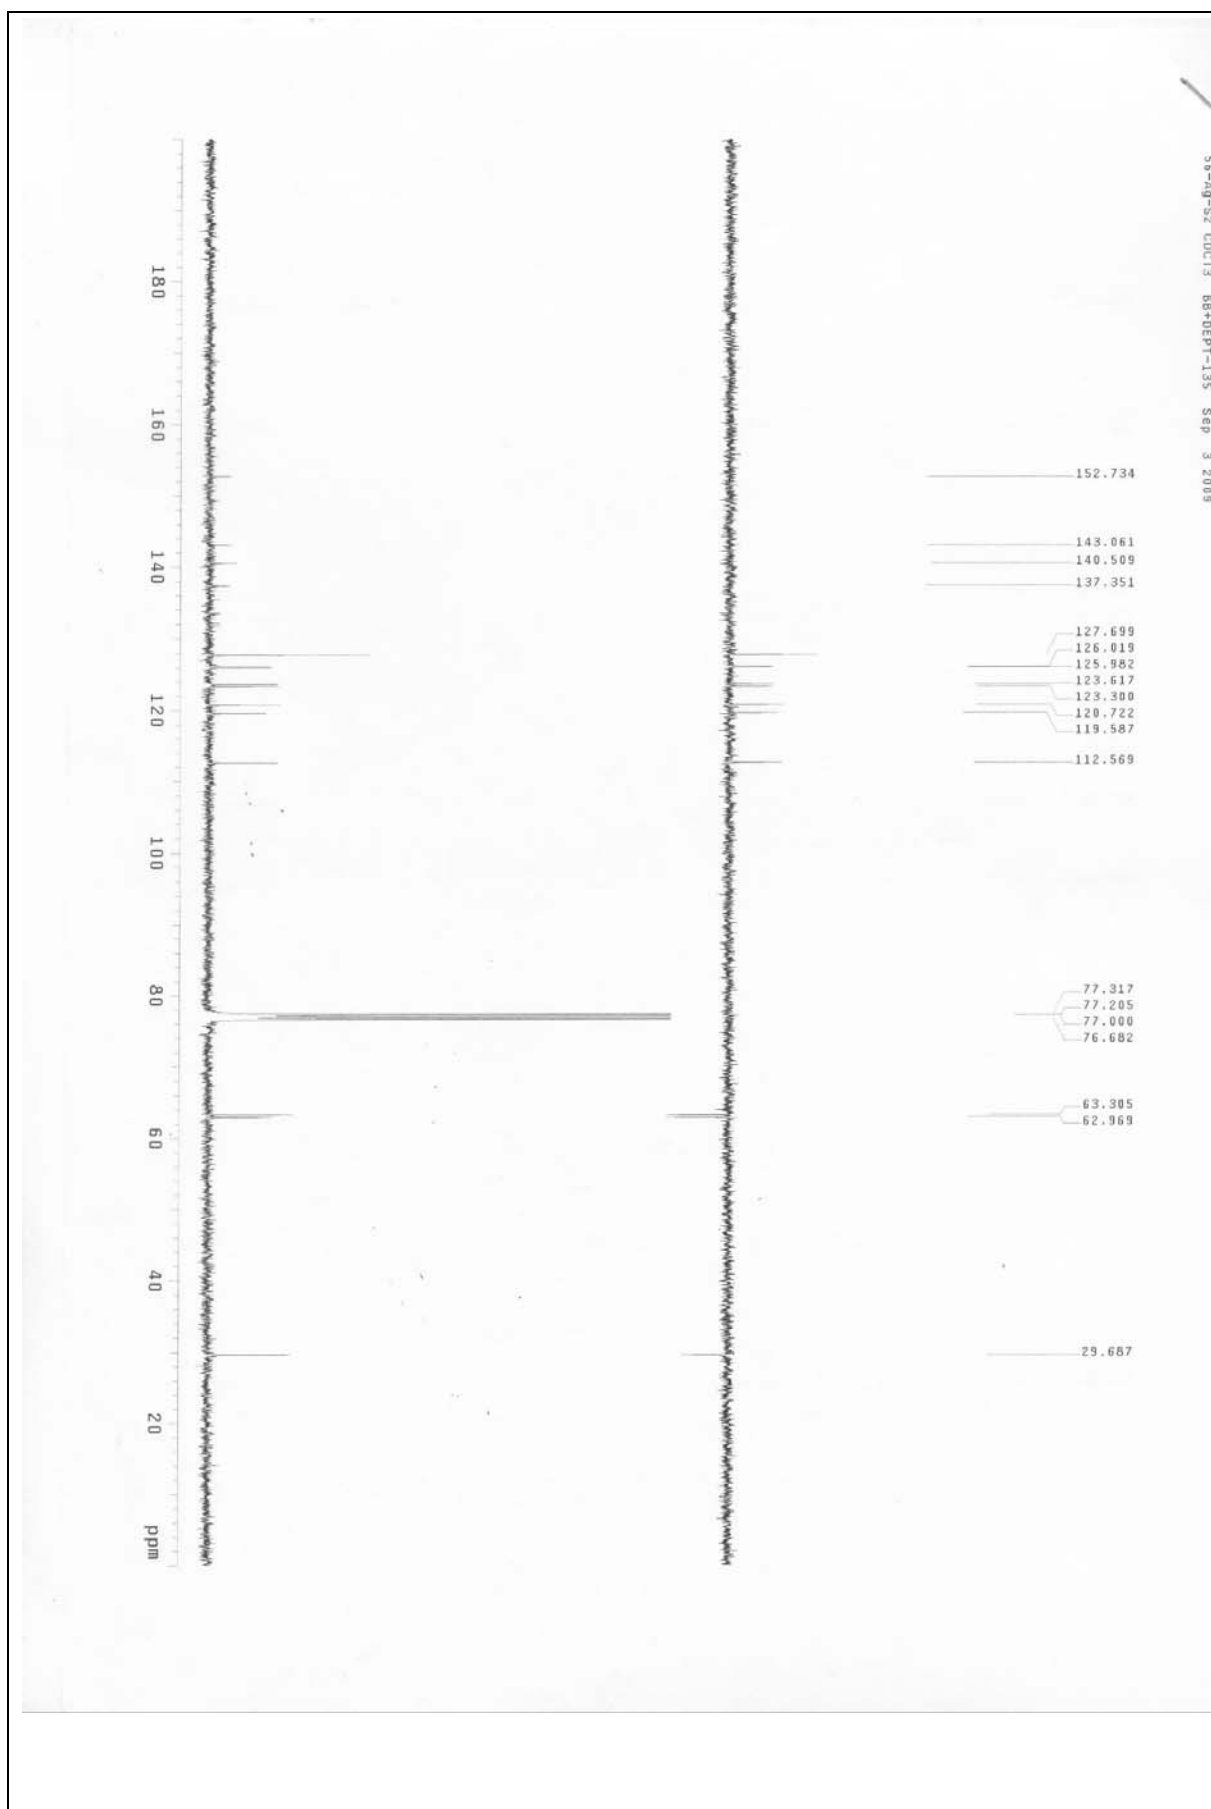

**4-[1-(4-Chloro-phenyl)-meth-(Z)-ylidene]-3,4-dihydro-1H-2-oxa-4a,9-diaza-fluorene  
(B26)**

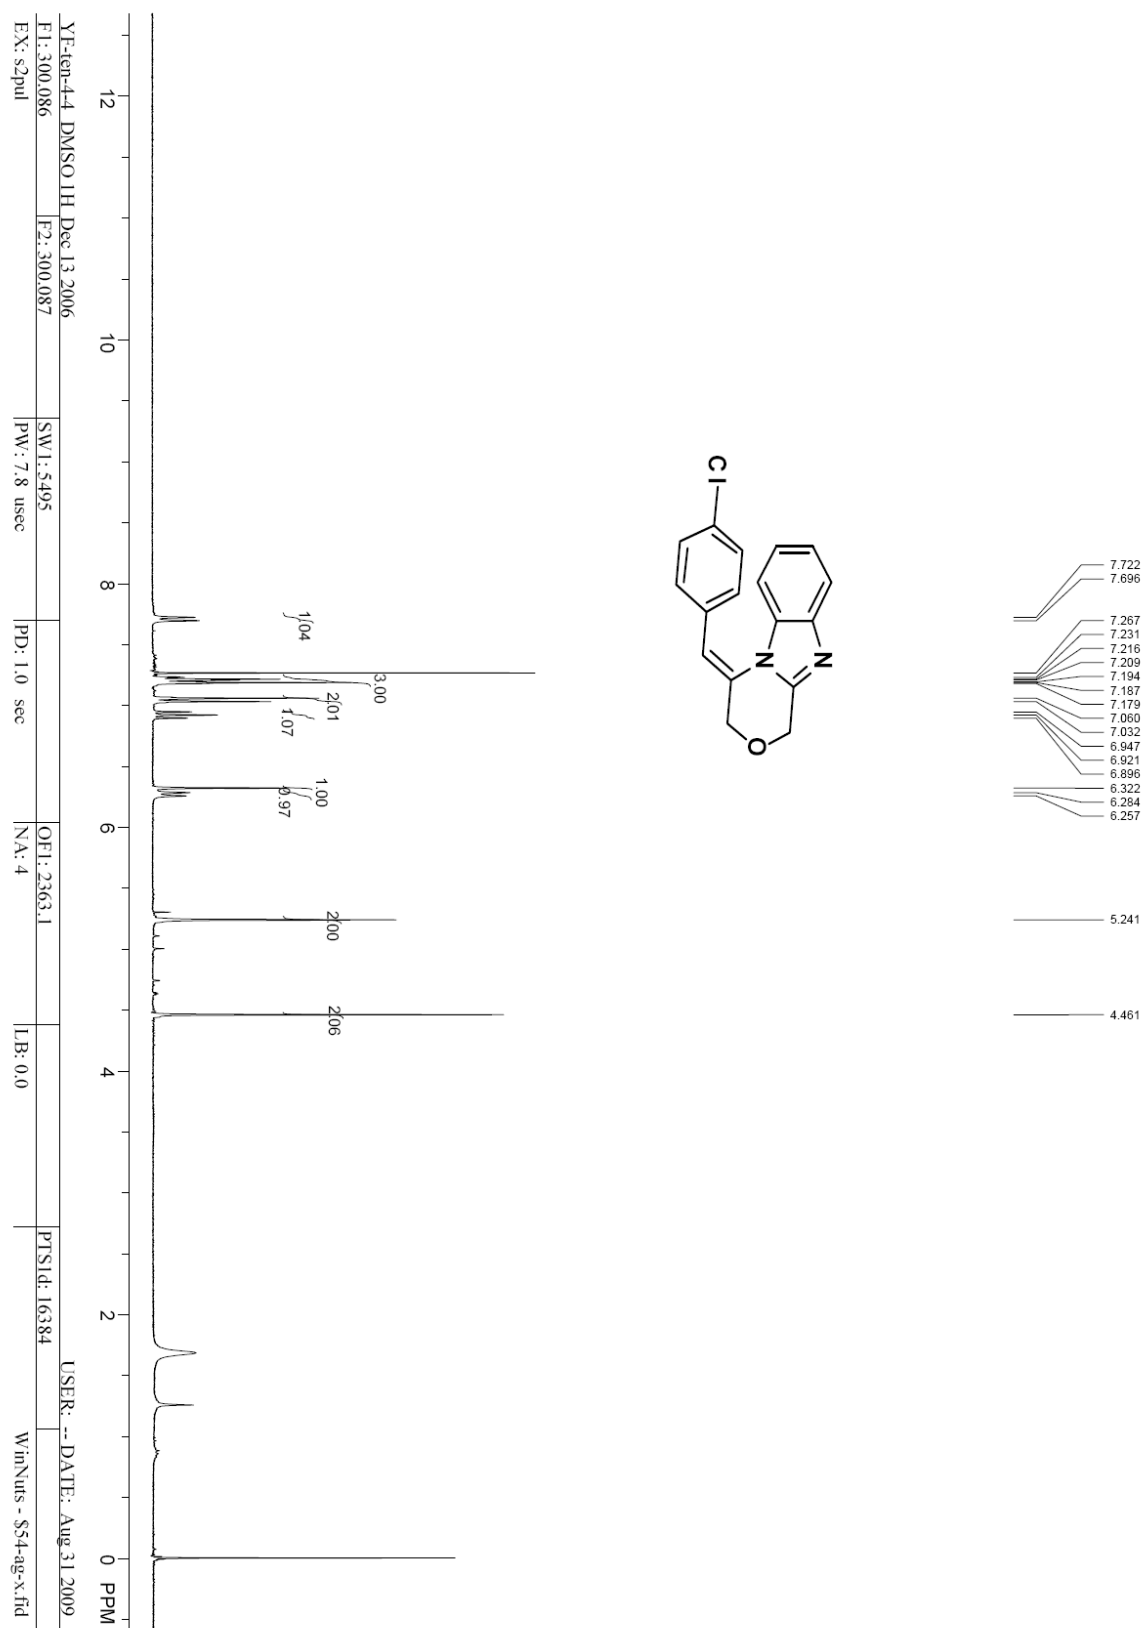

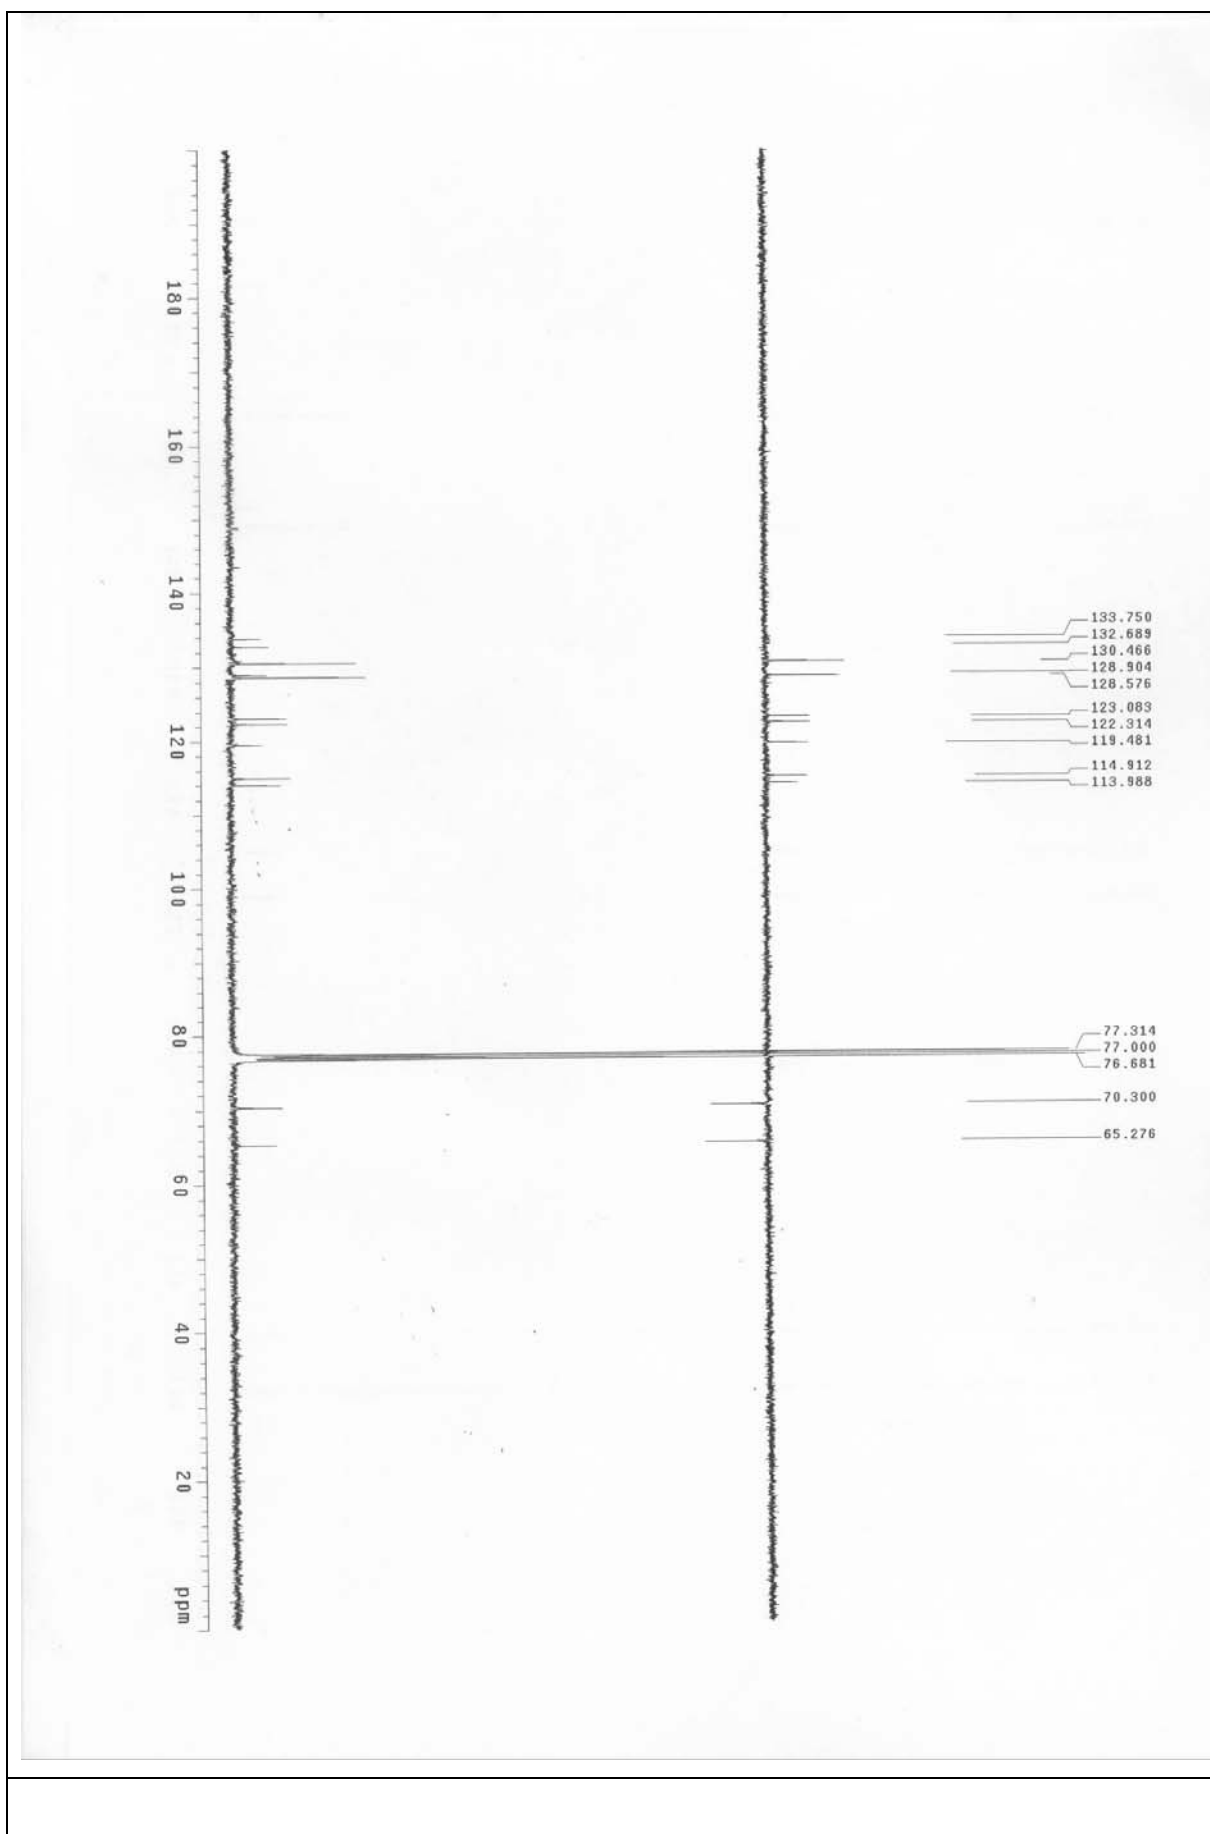



**5-(4-Chloro-phenyl)-7H,9H-8-oxa-4b,10-diaza-benz[a]azulene (C26)**

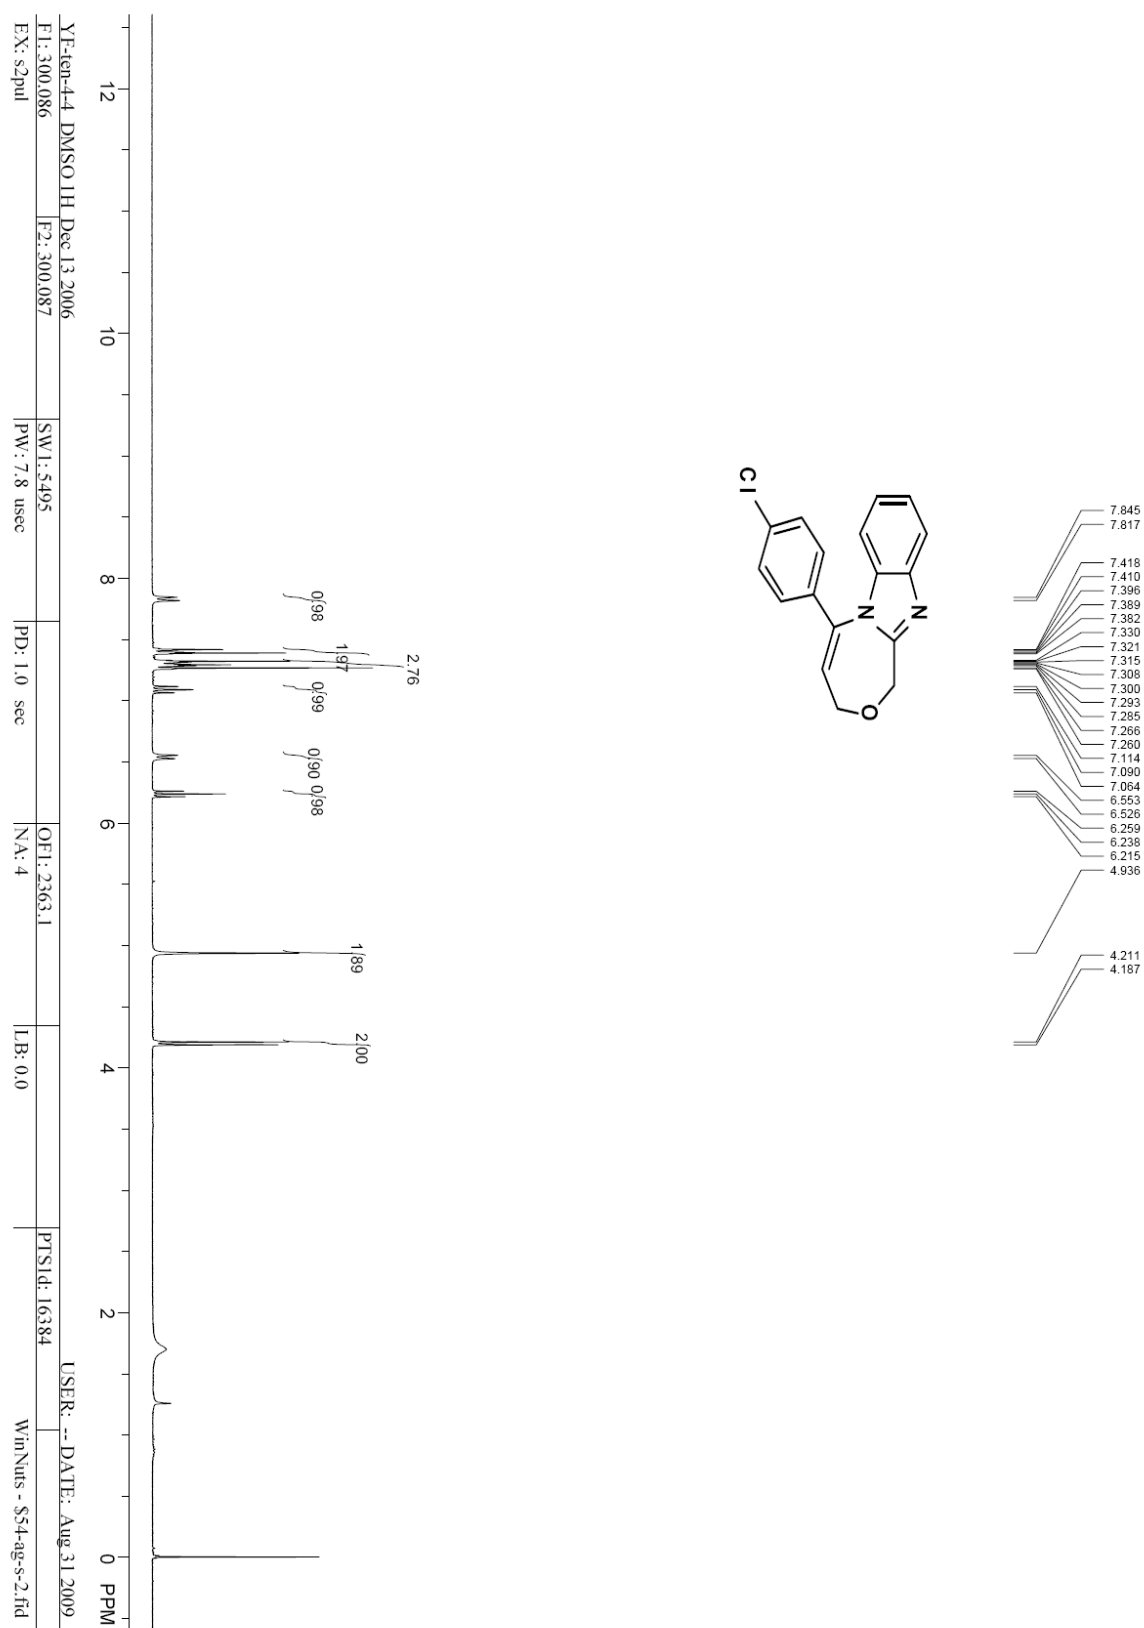

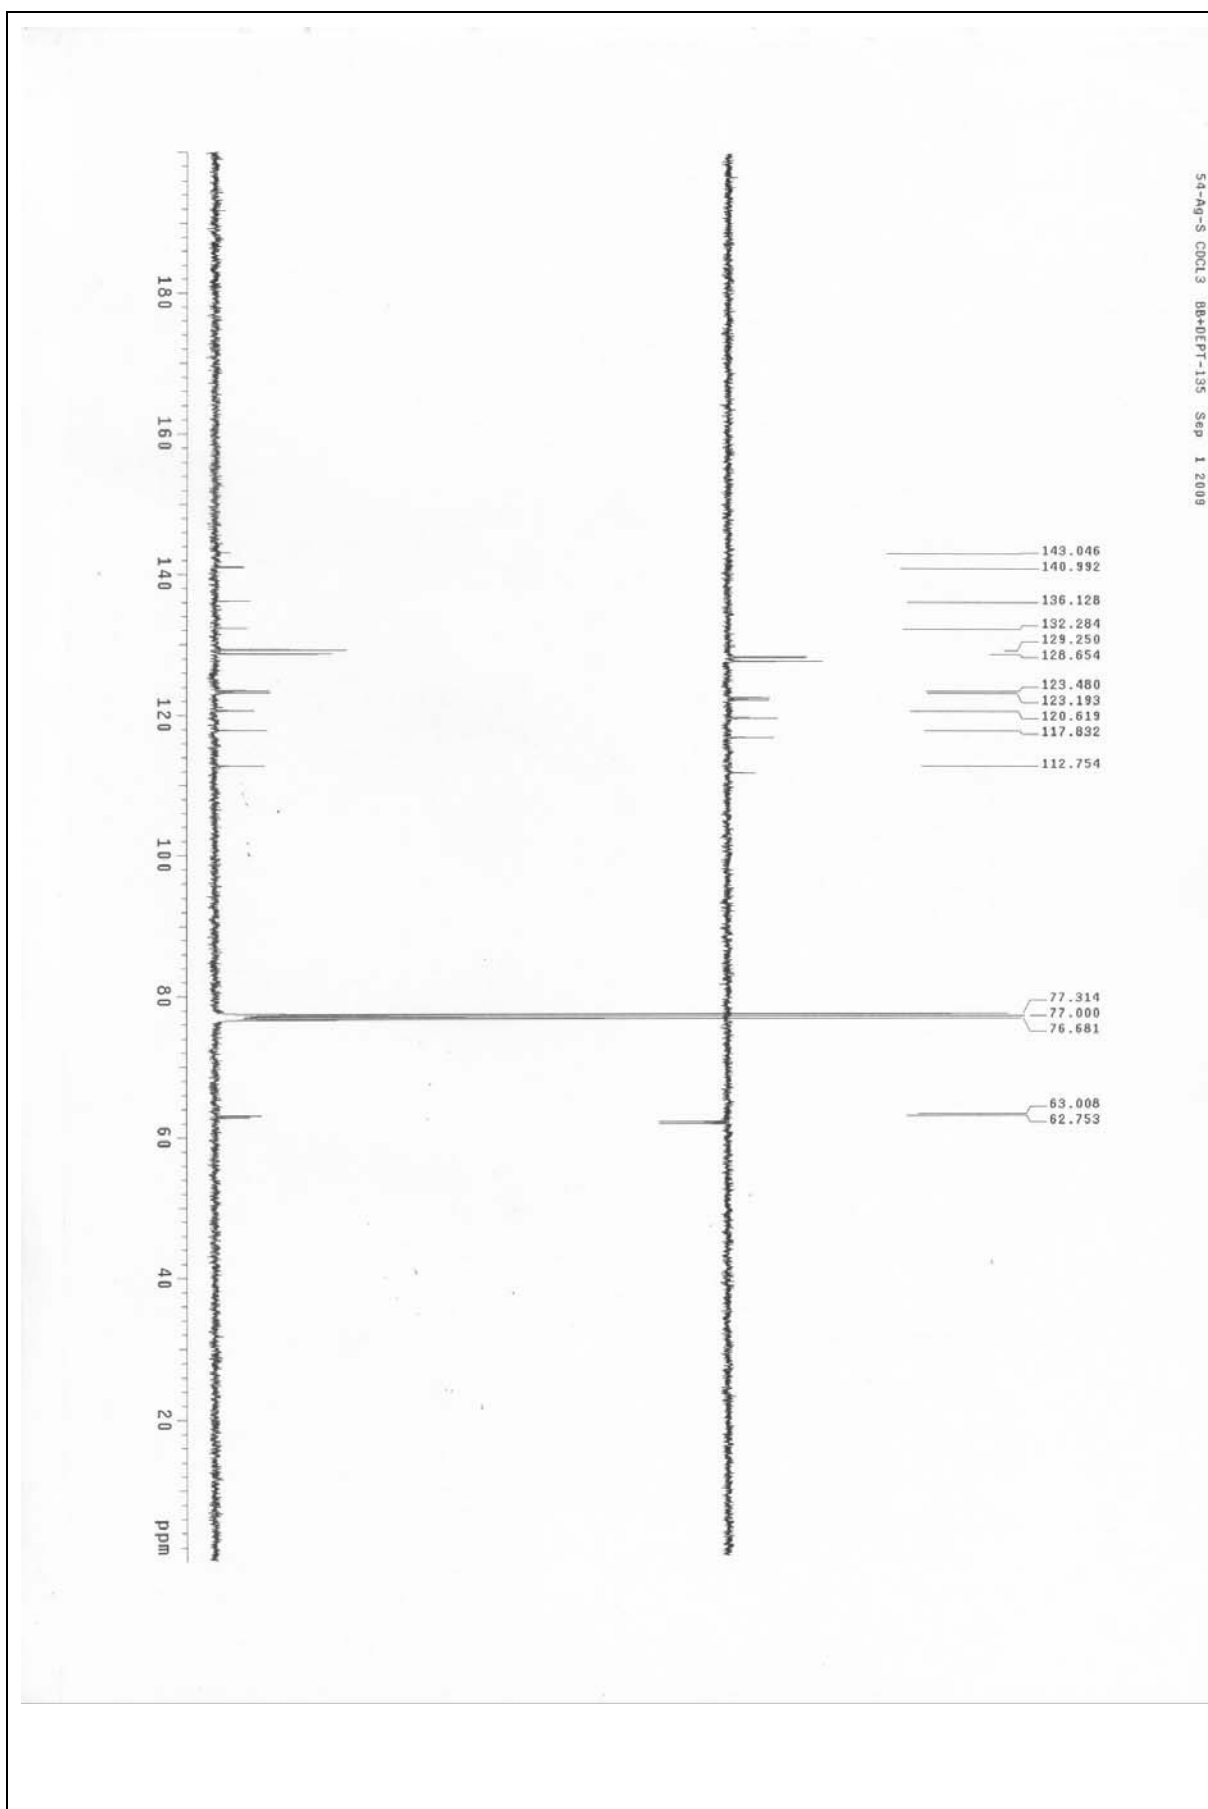

**8H,10H-9-Oxa-5b,11-diaza-naphth[2,3-a]azulene (C27)**

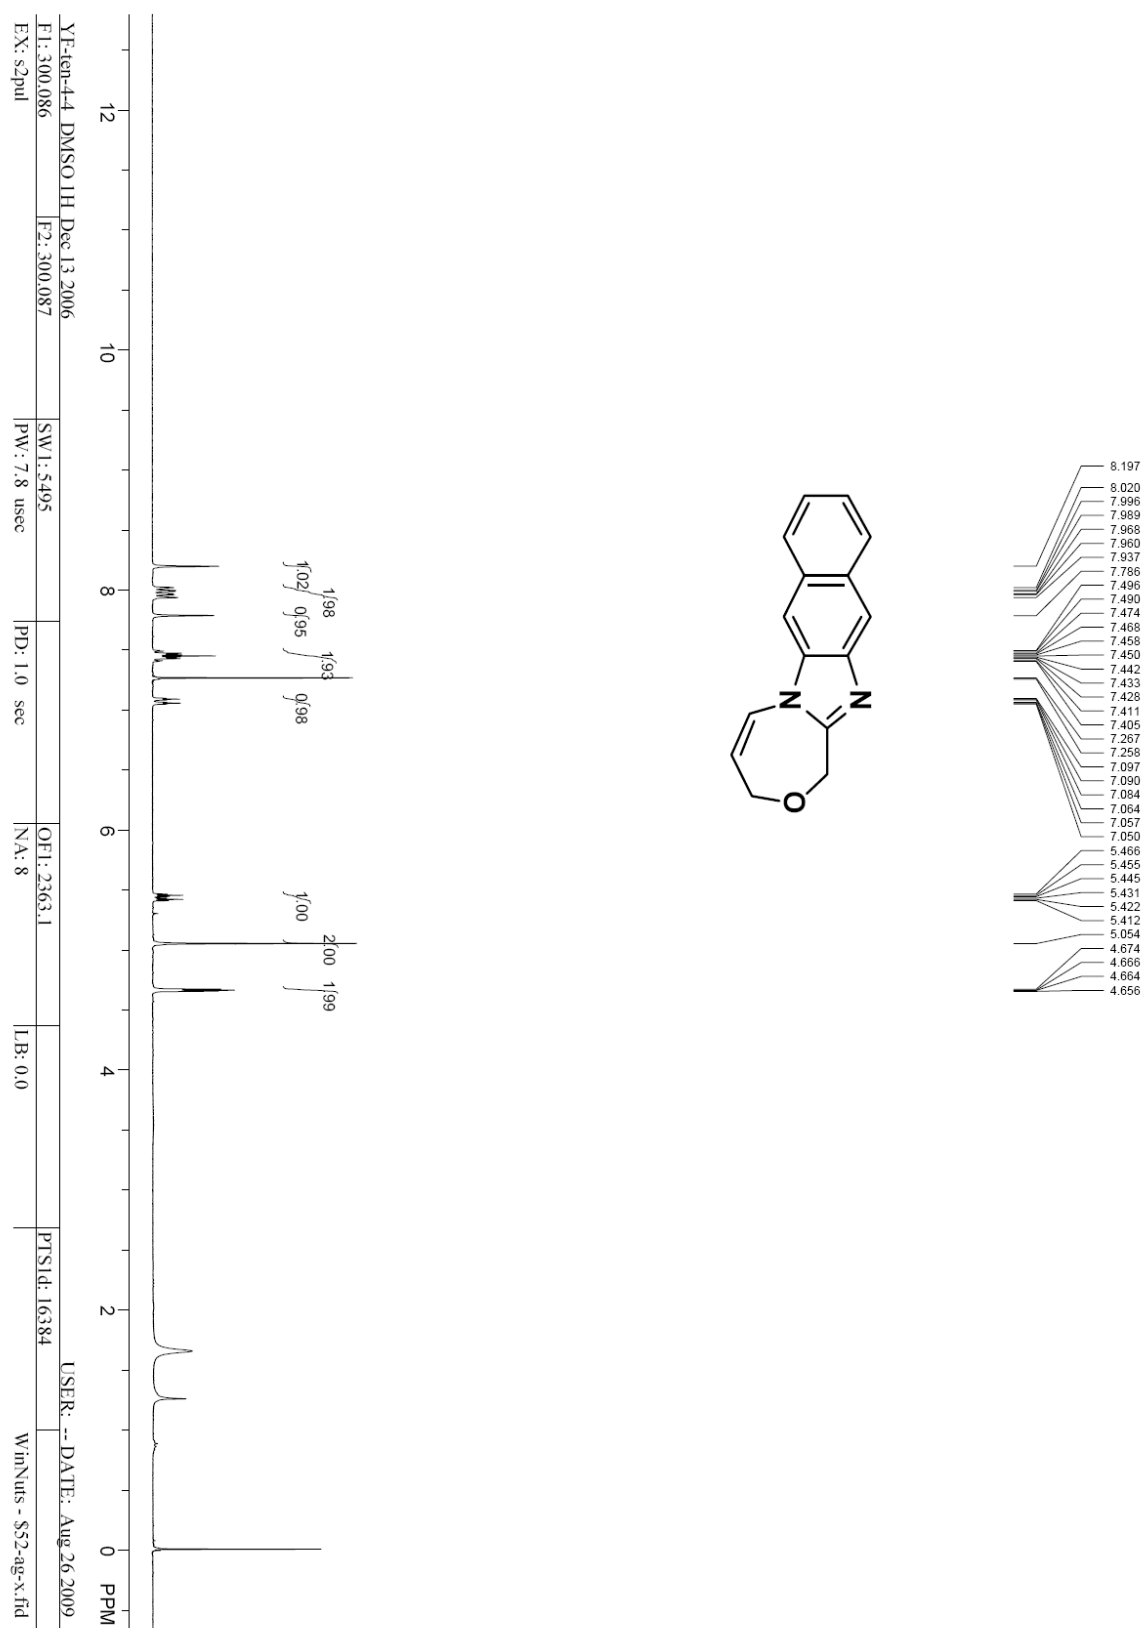

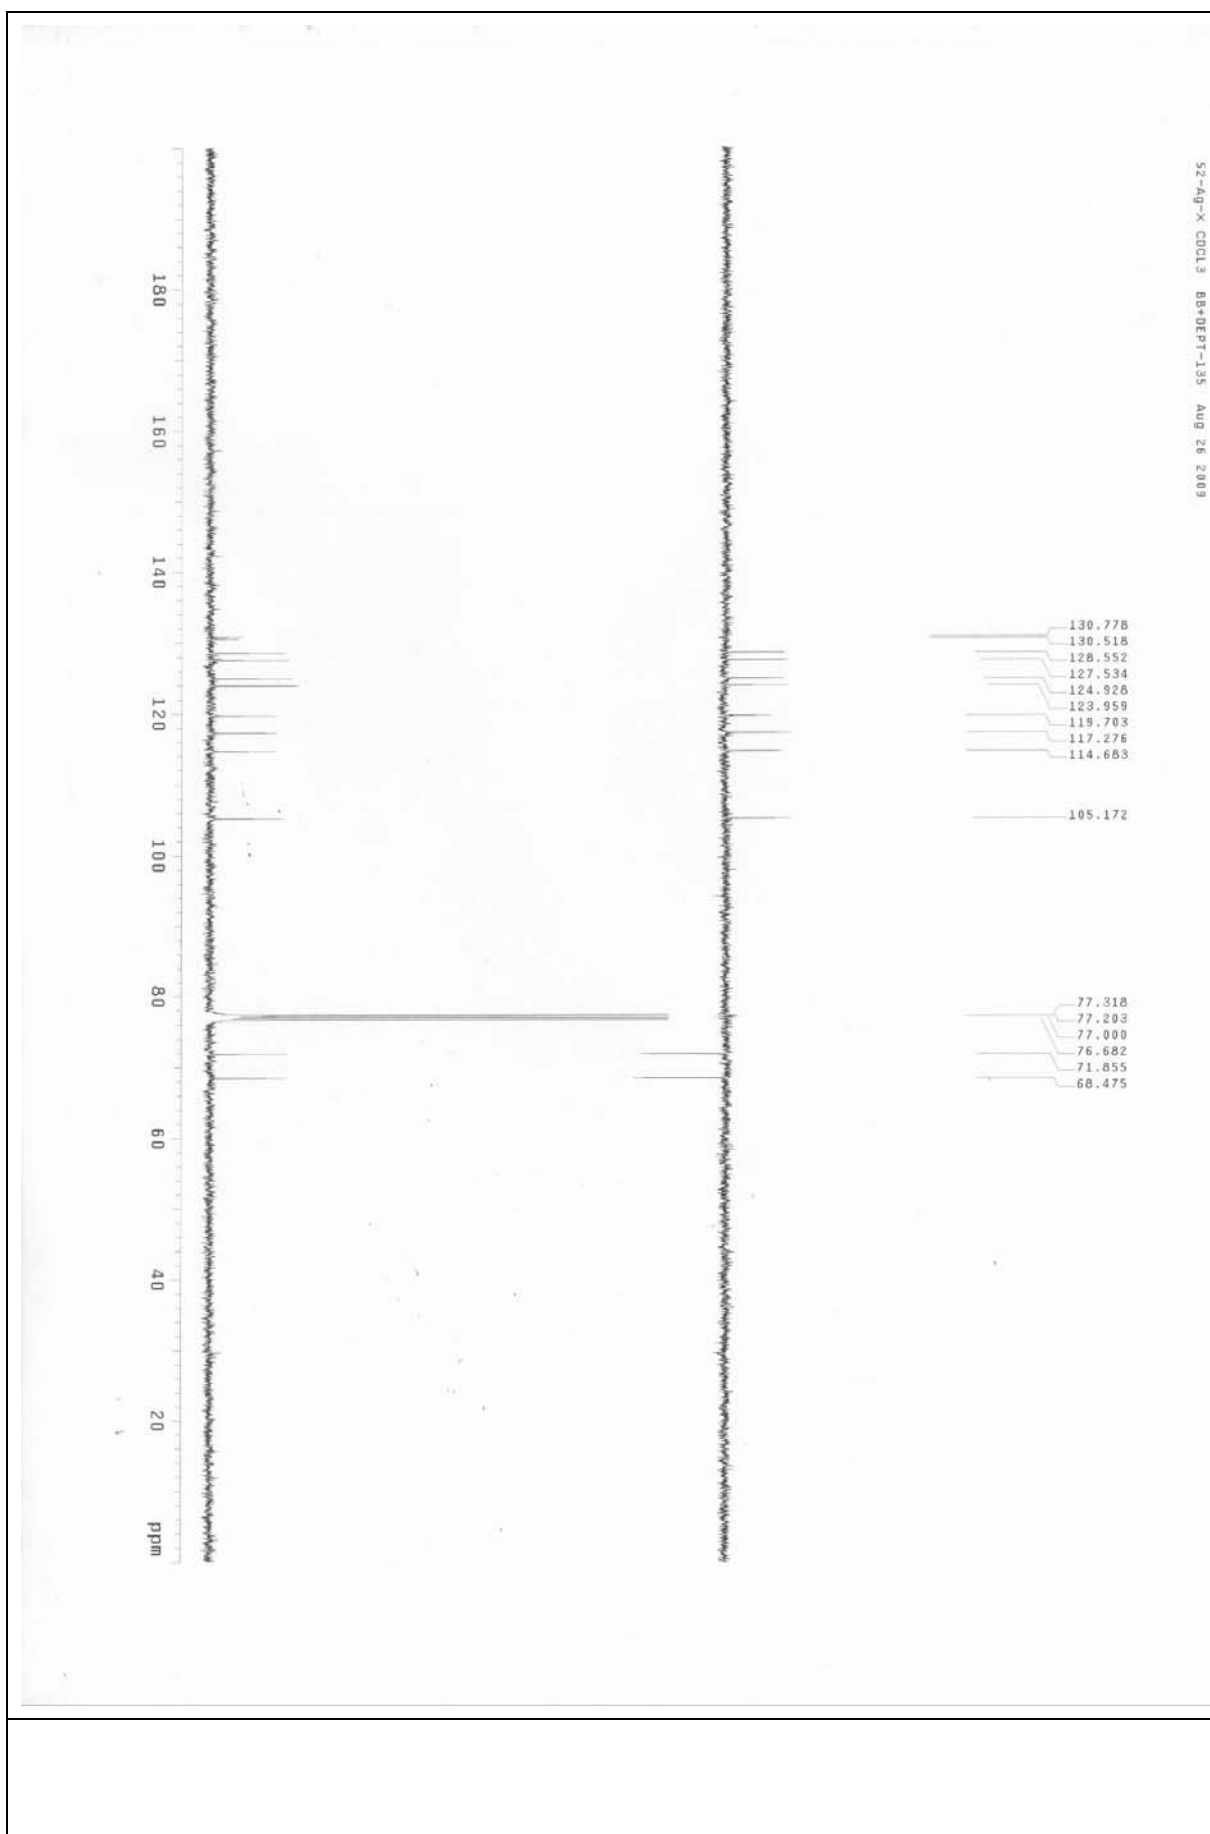

[d]-A2

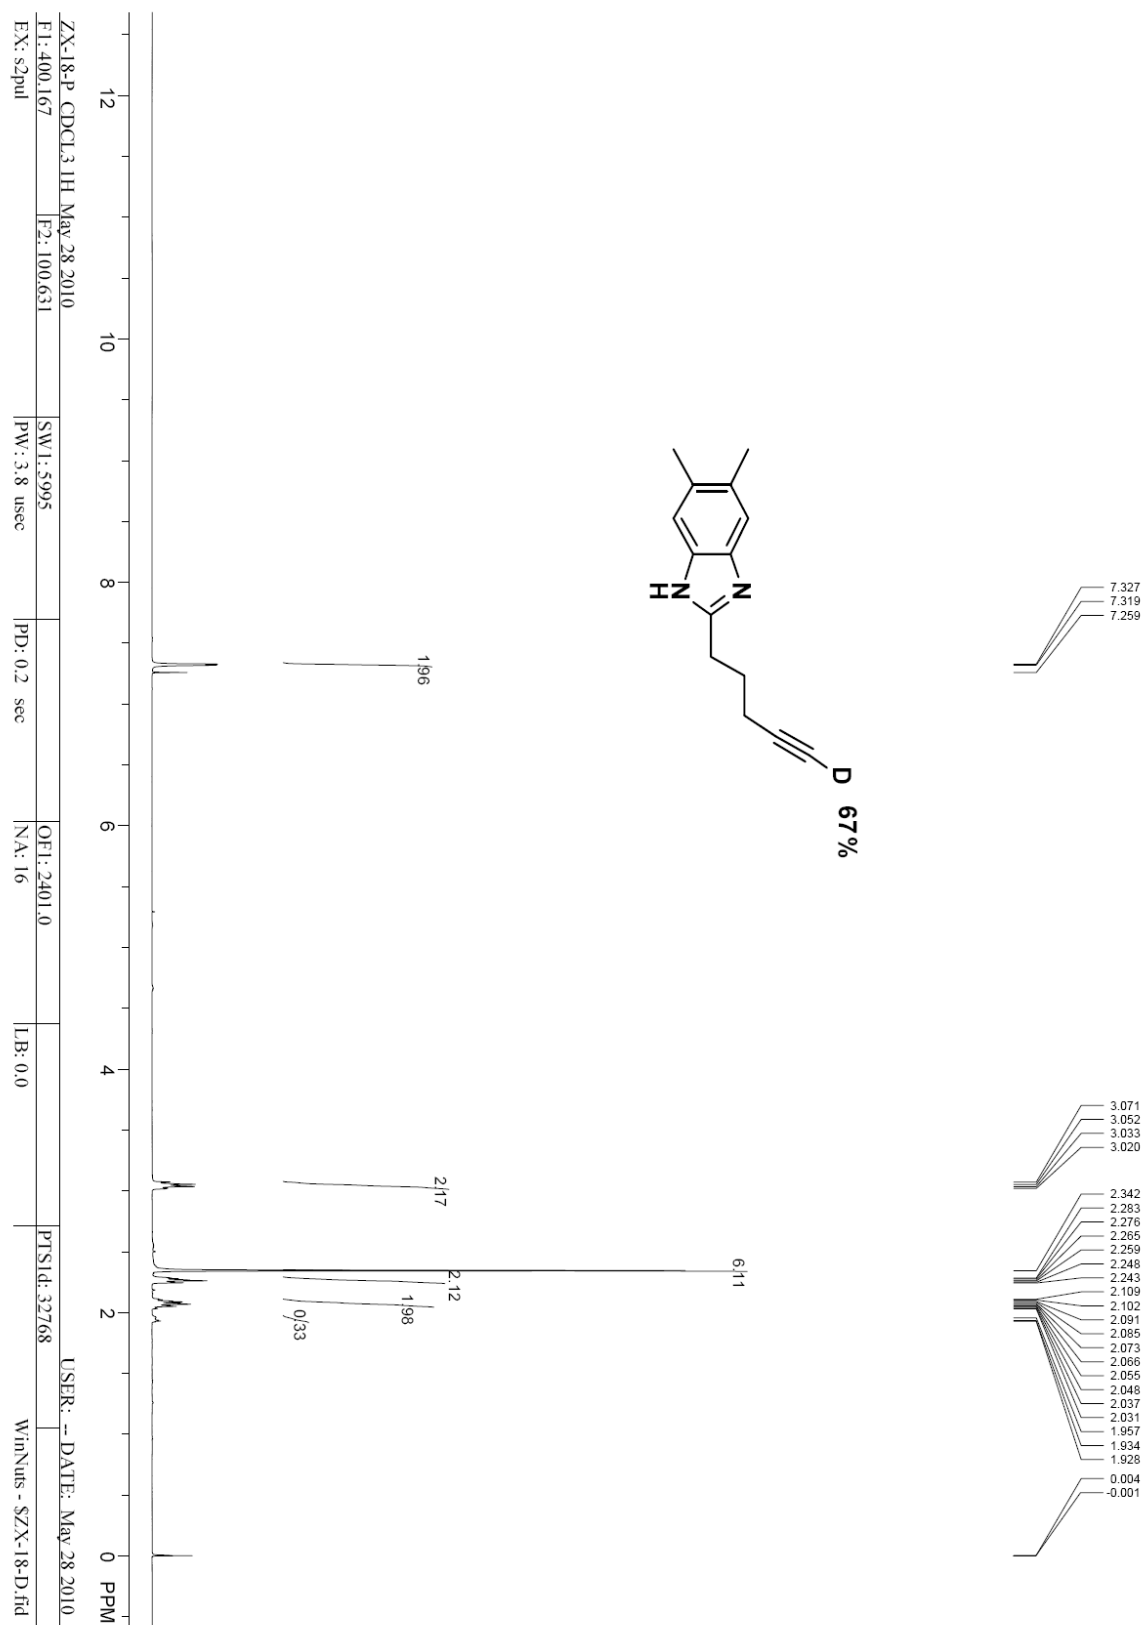

[d]-B2

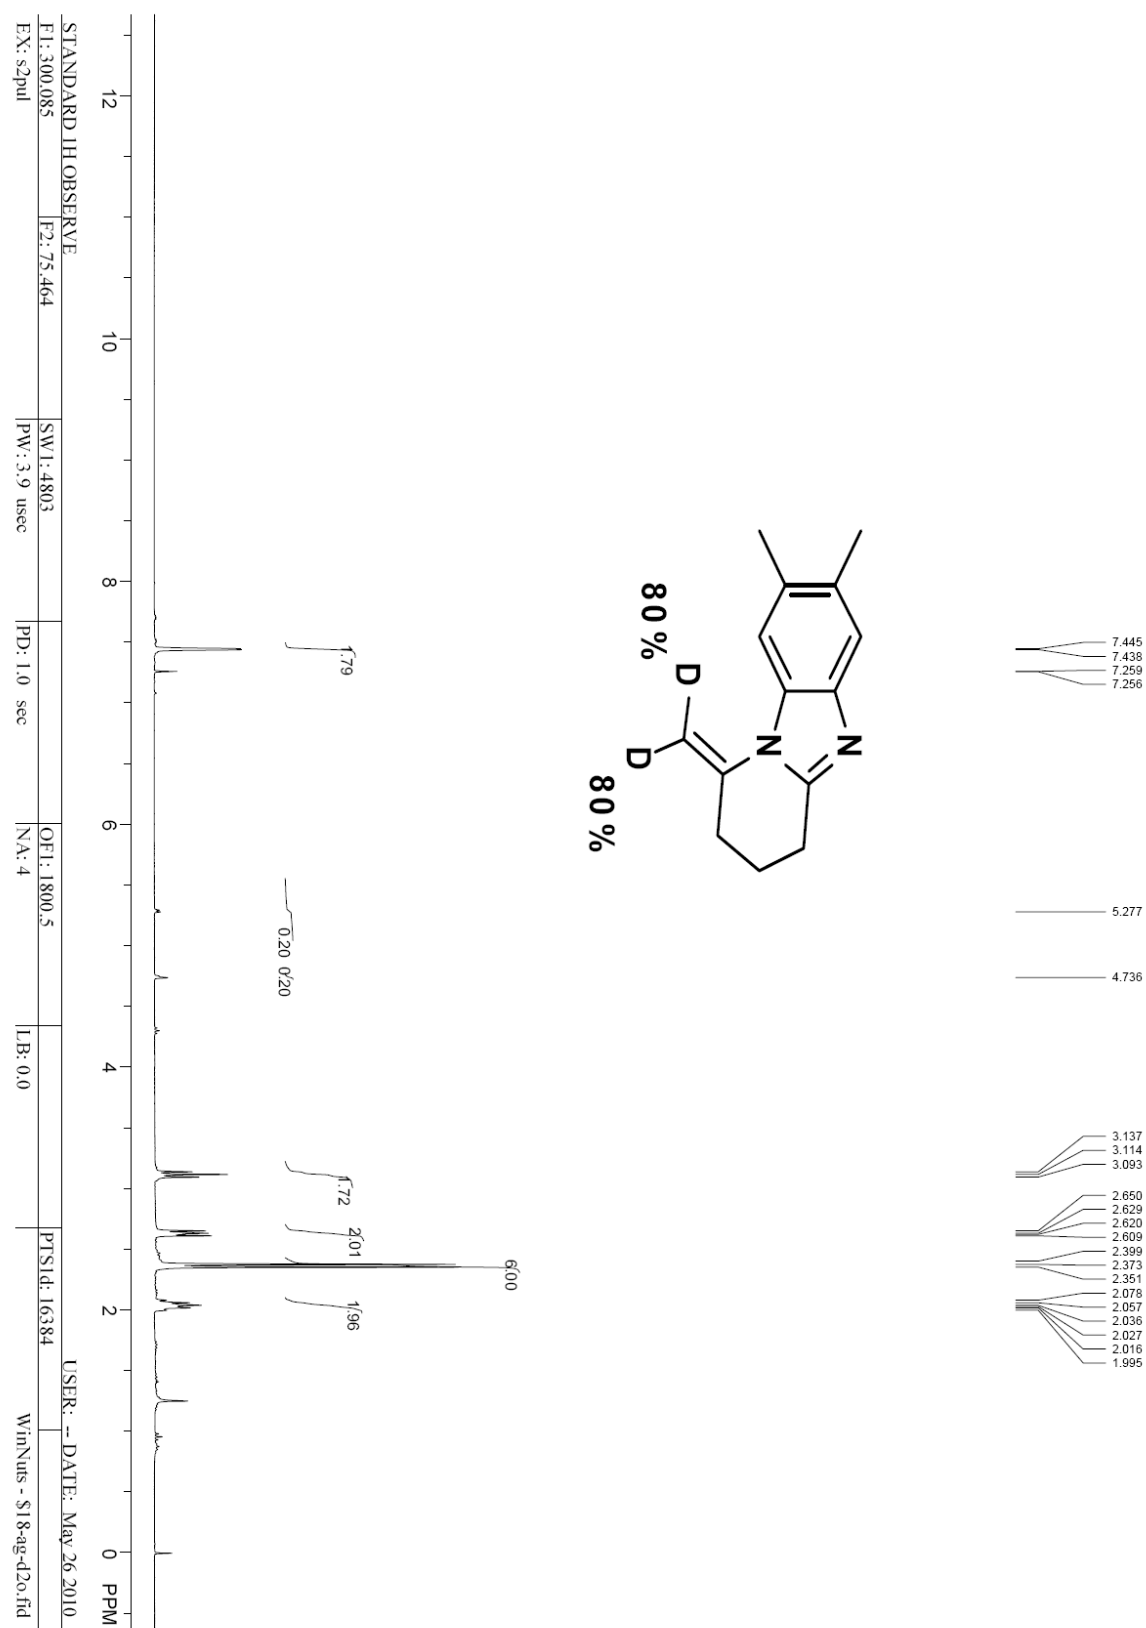

**[d]-B10**

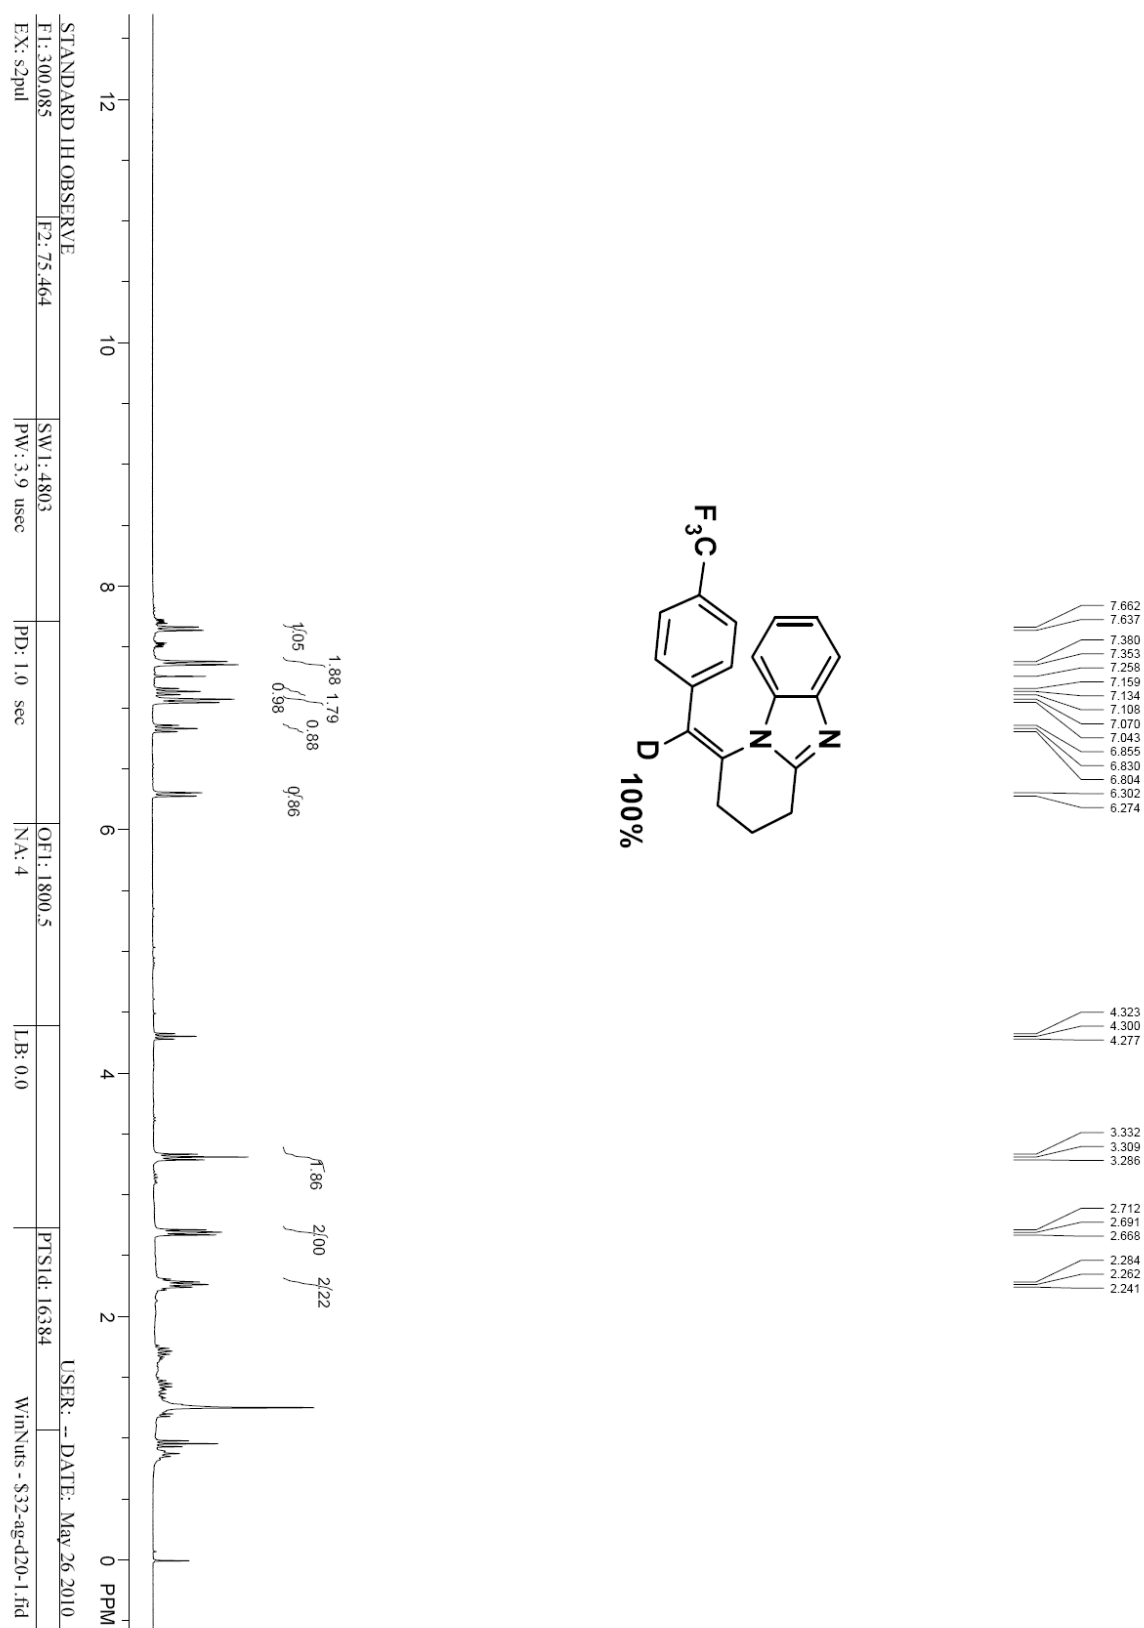

[d]-C19

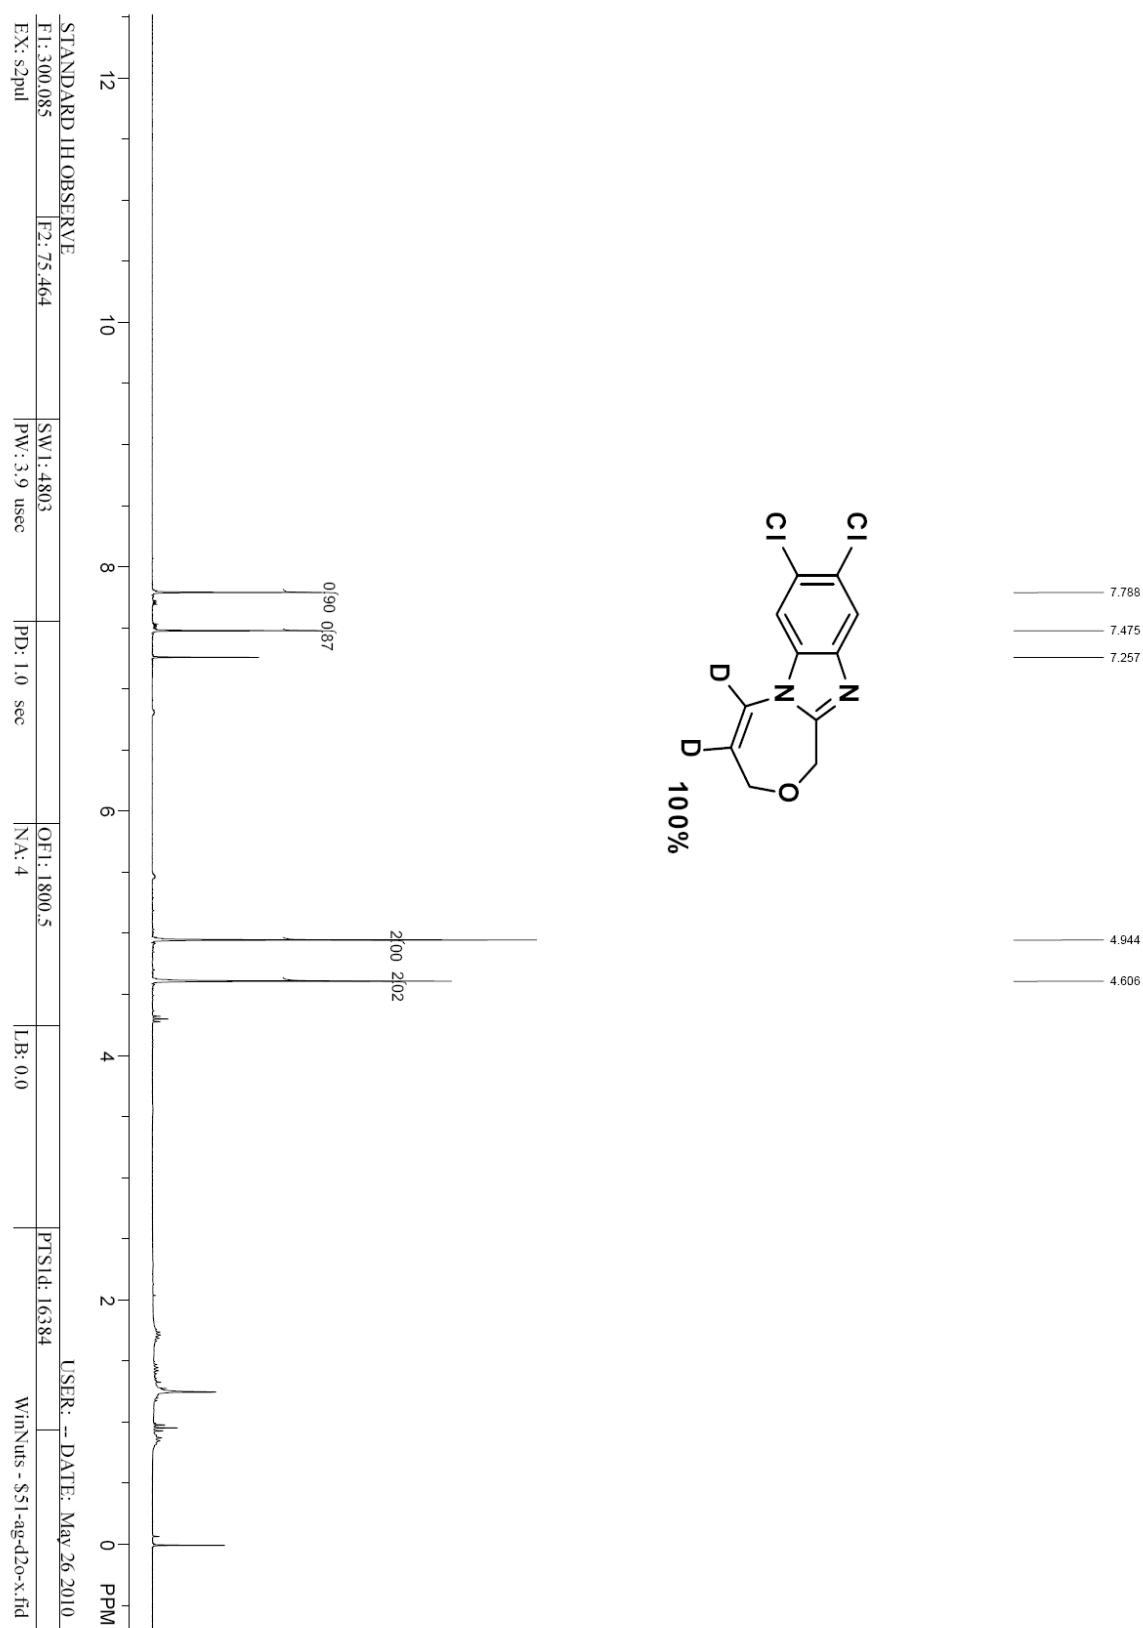



[d]-B23

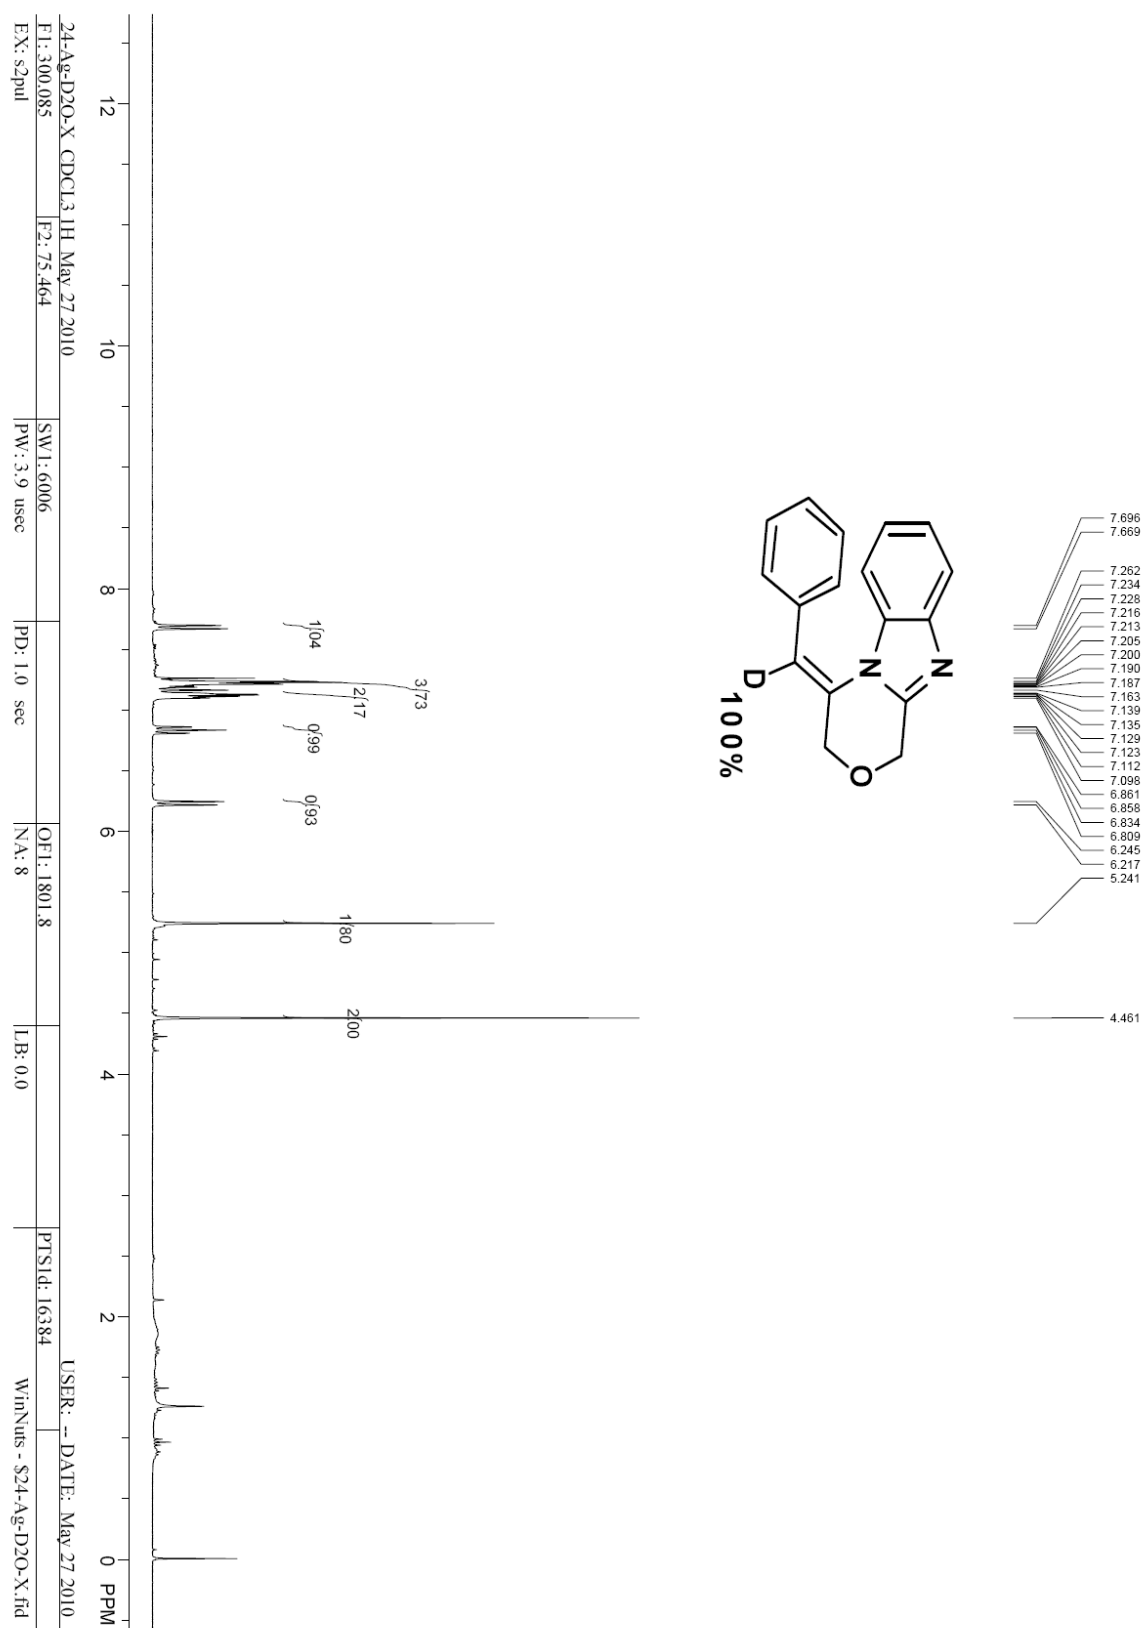

Supplement: c0gc00668h-2.pdf [file c0gc00668h-2.pdf]
